# Supplementary material for: Bioinformatics Analysis of Oral, Vaginal, and Rectal Microbial Profiles during Pregnancy: A Pilot Study on the Bacterial Co-Residence in Pregnant Women
Source: MDPI journal article supplement (doi:10.3390/microorganisms9051027), 2021-05-11
Supplement: s1 [file s1]

Table S1. Analysis workflow and QIIME2 parameter settings used in this study\*

| QIIME2 command (A)                           | Options                                                                                                                                                                                                                                                      |
|----------------------------------------------|--------------------------------------------------------------------------------------------------------------------------------------------------------------------------------------------------------------------------------------------------------------|
| qiime tools import                           | --type 'SampleData[PairedEndSequencesWithQuality]'<br>--input-path manifest_XX.csv<br>--output-path demux_XX.qza<br>--input-format PairedEndFastqManifestPhred33                                                                                             |
| qiime demux summarize                        | --i-data demux_XX.qza<br>--o-visualization demux.qzv                                                                                                                                                                                                         |
| qiime dada2 denoise-paired                   | --i-demultiplexed-seqs demux_XX.qza<br>--o-table table_XX.qza<br>--o-representative-sequences rep-seqs_XX.qza<br>--p-trim-left-f 0<br>--p-trim-left-r 0<br>--p-trunc-len-f 250<br>--p-trunc-len-r 250<br>--o-denoising-stats stats_XX.qza<br>--p-n-threads 0 |
| qiime metadata tabulate                      | --m-input-file stats_XX.qza<br>--o-visualization stats_XX.qzv                                                                                                                                                                                                |
| qiime feature-table summarize                | --i-table table_XX.qza<br>--o-visualization table_XX.qzv<br>--m-sample-metadata-file XX.txt                                                                                                                                                                  |
| qiime feature-table tabulate-seqs            | --i-data rep-seqs_XX.qza<br>--o-visualization rep-seqs_XX.qzv                                                                                                                                                                                                |
| qiime feature-classifier classify-sklearn    | --i-classifier (B).qza<br>--i-reads rep-seqs_XX.qza<br>--o-classification taxonomy.rep-seqs_XX.qza<br>--p-n-jobs 18                                                                                                                                          |
| qiime metadata tabulate                      | --m-input-file taxonomy.rep-seqs_XX.qza<br>--o-visualization taxonomy.rep-seqs_XX.qzv                                                                                                                                                                        |
| qiime taxa barplot                           | --i-table table_XX.qza<br>--i-taxonomy taxonomy.rep-seqs_XX.qza<br>--m-metadata-file XX.txt<br>--o-visualization taxa-bar-plots_XX.qzv                                                                                                                       |
| qiime phylogeny align-to-tree-mafft-fasttree | --i-sequences rep-seqs_XX.qza                                                                                                                                                                                                                                |

|                                                                            |                                                                                                                                                                                         |
|----------------------------------------------------------------------------|-----------------------------------------------------------------------------------------------------------------------------------------------------------------------------------------|
|                                                                            | --o-alignment aligned-rep-seqs_XX.qza<br>--o-masked-alignment masked-aligned-rep-seqs_XX.qza<br>--o-tree unrooted-tree_XX.qza<br>--o-rooted-tree rooted-tree_XX.qza<br>--p-n-threads 0  |
| qiime diversity alpha-rarefaction                                          | --i-table table_XX.qza<br>--i-phylogeny rooted-tree_XX.qza<br>--p-max-depth XXXXX<br>--m-metadata-file XX.txt<br>--o-visualization alpha-rarefaction_XX.qzv                             |
| qiime diversity core-metrics-phylogenetic                                  | --i-phylogeny rooted-tree_XX.qza<br>--i-table table_XX.qza<br>--p-sampling-depth XXXX<br>--m-metadata-file XX.txt<br>--output-dir core-metrics-results-XX                               |
| qiime diversity beta-group-significance<br>(for bray curtis distance)      | --i-distance-matrix bray_curtis_distance_matrix.qza<br>--m-metadata-file XX.txt<br>--m-metadata-column XX<br>--o-visualization bray_curtis_distance_Group.qzv<br>--p-pairwise           |
| qiime diversity beta-group-significance<br>(for weighted unifrac distance) | --i-distance-matrix weighted_unifrac_distance_matrix.qza<br>--m-metadata-file XX.txt<br>--m-metadata-column XX<br>--o-visualization weighted_unifrac_distance_Group.qzv<br>--p-pairwise |

A : QIIME2 version 2019.4 (<https://docs.qiime2.org/2019.4/>) was used in this study.

B : silva-132-99-nb-classifier

\*The default setting of QIIME2 software, where the confidence of the taxon classification was 0.7, was used in this study.
