# Supplementary material for: Bioinformatics Analysis of Oral, Vaginal, and Rectal Microbial Profiles during Pregnancy: A Pilot Study on the Bacterial Co-Residence in Pregnant Women
Source: MDPI journal article supplement (doi:10.3390/microorganisms9051027), 2021-05-11
Supplement: s1 [file s1]

A

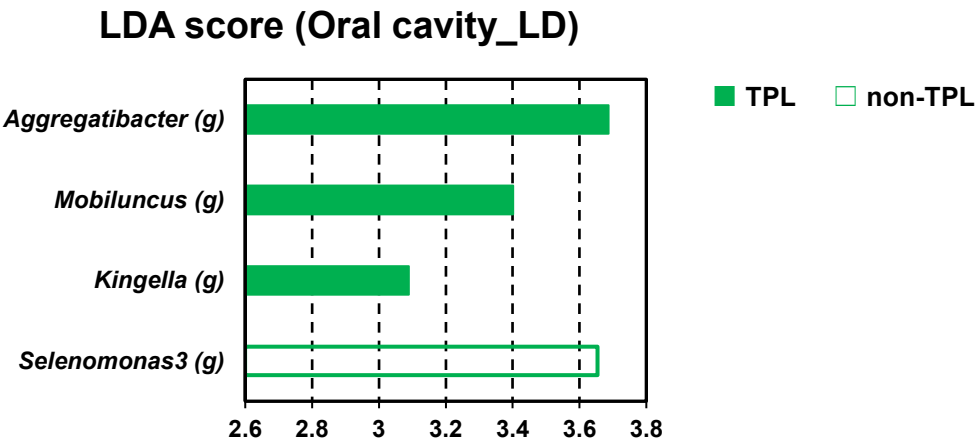

B

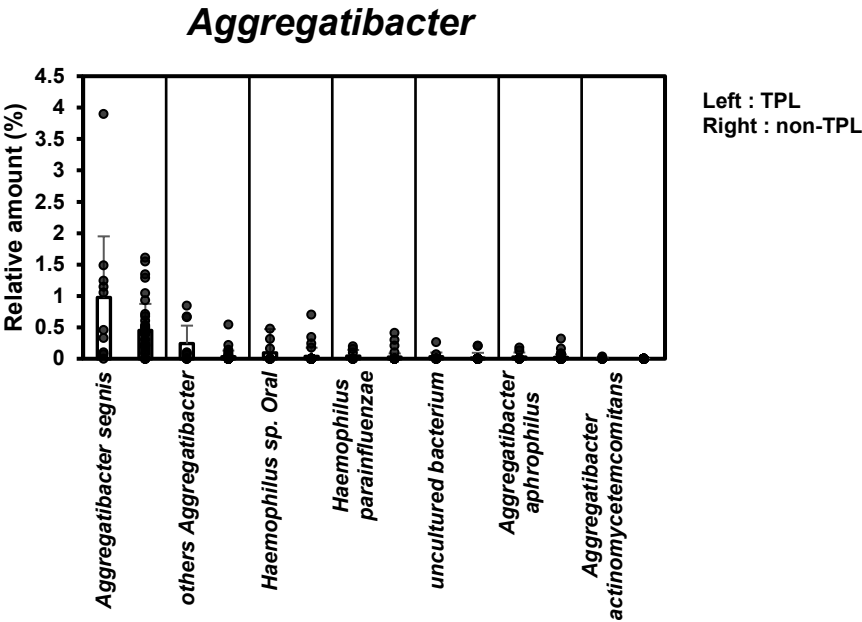

**Figure S1. The significant different genera were found in oral cavity of the LD group in the TPL group.**

(A) Differences in oral microbiota composition of the LD group at the genus level were determined using the linear discriminant analysis (LDA) effect size (LEfSe) analysis (LDA score > 2). The bar graph shows the significantly different genera in the non-TPL and TPL group. (B) The bar graph showing the relative abundance at the species level from *Aggregatibacter*. Data show the mean  $\pm$  SEM, and Dunn's multiple comparisons test was applied. Left, TPL group; Right, non-TPL group.
