# Supplementary material for: Bioinformatics Analysis of Oral, Vaginal, and Rectal Microbial Profiles during Pregnancy: A Pilot Study on the Bacterial Co-Residence in Pregnant Women
Source: Microorganisms. 2021 May 11;9(5):1027. doi: 10.3390/microorganisms9051027 (PMC8151423; doi:10.3390/microorganisms9051027)
Supplement: Supplementary file 1 [file microorganisms-09-01027-s001.zip]

Archive with 5 entries (5 files):
- Figure S1.pdf
- Table S1 20210504.pdf
- Table S2 Patients' information in table1_20210504.xlsx
- Table S3 Raw data of Fig S1.xlsx
- Table S4 Raw data of Fig 1,2 and 3.xlsx
