# Supplementary material for: Bioinformatics Analysis of Oral, Vaginal, and Rectal Microbial Profiles during Pregnancy: A Pilot Study on the Bacterial Co-Residence in Pregnant Women
Source: Microorganisms. 2021 May 11;9(5):1027. doi: 10.3390/microorganisms9051027 (PMC8151423; doi:10.3390/microorganisms9051027)
Supplement: Supplementary file 1 [file microorganisms-09-01027-s001.zip › Table S2 Patients' information in table1_20210504.xlsx]

## Sheet: Sheet1
No	CST	LD	age	pre-BMI(kg/m2)	post-BMI(kg/m2)	gain weight(kg)	IVF-ET	Parity	Diabetes Mellitus	Uterine Leiomyoma	hypothyroidism	hyperthyroidism	Threatened Preterm Labor	Gestational Diabetes Mellites	Hyperhensive Disorders of Pregnancy	Premature rapture of membrane	Gestational age at delivary	spontaneous preterm birth	birth weight of neonate
1	1	1	38	23.2335	26.6784	8.6	0	1	0	0	0	0	0	0	0	0	37.7143	0	2650
2	1	1	31	18.0697	22.9592	13.8	0	0	0	0	0	0	0	0	1	0	39.4286	0	3085
3	1	1	40	25.8478	29.397	9.2	0	0	0	0	0	0	0	0	0	0	38.7143	0	3020
5	3	1	31	25.7117	29.7521	11	0	1	0	0	0	0	0	1	0	0	40.1429	0	4030
7	3	1	29	18.7795	22.4555	9.2	0	0	0	0	1	0	0	0	0	0	39.8571	0	3215
9	1	1	34	21.5019	28.561	17.4	0	1	0	0	0	0	0	1	1	0	39.7143	0	2890
10	4	0	38	18.3655	22.4059	11	1	0	0	0	0	0	0	0	0	0	34.8571	0	2660
11	3	1	37	22.2719	25.8268	8.3	0	1	0	0	0	0	0	0	0	0	41.4286	0	3550
12	3	1	35	19.1953	23.4107	11.2	0	1	0	0	0	0	0	0	0	0	38.2857	0	2650
13	1	1	35	17.558	22.5886	12.75	0	0	0	0	0	0	0	0	0	0	38.1429	0	2620
14	2	1	33	22.4323	25.5568	7.8	0	1	0	1	0	0	0	1	0	0	38.7143	0	3375
15	3	1	40	30.3498	33.9716	8.95	0	0	1	0	0	0	0	1	0	0	39.8571	0	2755
16	2	1	30	23.0681	26.8914	8.95	1	0	0	0	0	0	0	0	0	0	39	0	3250
17	3	1	38	23.833	25.5999	4.3	0	1	0	0	0	0	0	0	0	0	38.7143	0	3200
18	3	1	33	19.7055	22.8659	8.5	0	0	0	0	0	0	0	0	0	0	39.1429	0	2610
19	2	1	31	16.0584	19.0916	8.5	0	0	0	0	0	0	0	0	0	0	38.4286	0	2597
21	2	1	29	16.2031			0	1	0	0	0	0	1	0	0	0	37.4286	0
22	4	0	31	18.0657	21.0465	6.6	0	0	1	0	0	0	1	0	0	0	35.1429	1	2070
23	2	1	29	19.2277	25.1162	14.7	0	0	0	0	0	0	0	0	0	0	37.2857	0	3120
24	4	0	32	23.3091			0	0	0	0	0	0	1	0	0	0	36.7143	1
25	4	0	30				0	1	0	0	0	0	0	0	0	0	39.5714		2406
28	5	0	36	27.3909	29.6478	5.85	1	1	0	0	0	0	1	0	0	0	36.5714	0	2680
29	2	1	33	22.2222	28.4667	14.05	0	0	0	0	0	0	0	0	0	0	40.2857	0	3090
30	1	1	37	21.2585	24.9787	10.5	0	1	0	1	0	0	0	0	0	0	38.4286	0	2970
31	5	0	40	21.6413	24.6278	6.9	0	1	0	0	0	0	1	1	0	0	37.4286	0	2890
34	3	1	30	32.8731	33.7566	2.15	0	1	0	0	0	0	0	0	0	0	38.7143	0	2560
35	4	0	40	20.3186	24.6363	10.2	1	0	0	0	1	0	0	0	0	0	39.2857	0	3095
37	1	1	23	23.7374	28.0027	11.5	0	0	0	0	0	0	0	1	0	0	38.5714	0	2580
38	3	1	41	27.4714	27.6795	0.5	1	0	0	1	0	0	0	1	0	0	37.8571	0	2725
39	1	1	32	18.577	21.5324	7	0	0	0	0	0	0	0	0	0	0	38.1429	0	3115
40	3	1	30	22.3478	25.9529	8.55	0	1	1	0	0	0	1	0	0	1	39.1429	0	3240
43	2	1	36	24.7156	33.1477	21.05	0	1	0	0	0	0	0	1	0	0	38.5714	0	3975
45	1	1	38	24.6548	30.2022	13.5	0	0	0	0	0	0	0	0	0	0	37.8571	0	2990
46	1	1	36	25.9107	28.7304	7.4	0	0	0	1	0	0	0	0	0	0	41.5714	0	4035
47	1	1	35	20.5044	23.0129	5.75	1	1	0	1	0	0	0	0	0	0	38.7143	0	2645
48	1	1	33	23.0518	28.8891	15.7	0	0	0	1	0	0	1	0	0	0	35.8571	1	2620
49	4	0	33	24.671	29.1745	11.5	1	0	0	0	1	0	0	0	0	0	40	0	3524
50	1	1	37	18.2868	22.3206	11.25	0	1	0	0	0	0	1	0	0	0	37.5714	0	2590
52	4	0	33	20.4946	24.8637	9.7	1	1	0	0	0	0	0	0	0	0	38	0	3325
55	1	1	41	20.8118	24.7224	11.65	1	0	0	0	1	0	1	0	0	0	38	0	2560
57	4	0	36	22.7732	28.2828	15	1	1	0	0	0	0	0	0	0	0	41.1429	0	3455
59	2	1	35	27.7344	31.582	9.85	0	1	0	0	0	0	0	0	0	0	38.1429	0	3835
60	1	1	28	30.2243	28.1959	-5	0	0	0	0	0	0	0	0	0	0	41.2857	0	2895
63	3	1	33	18.4265	21.3507	7.3	1	0	0	0	0	0	1	0	0	0	37.1429	0	2740
64	4	0	30	28.3795	32.4214	9.4	0	0	0	1	1	0	0	0	1	0	38.1429	0	2885
65	1	1	41	18.3655	24.9036	17.8	1	0	0	0	0	0	0	0	0	0	39.4286	0	3385
67	1	1	28	19.433	22.2908	7.5	0	0	0	0	0	0	0	0	0	0	40.1429	0	2285
68	1	1	21	19.1327	25.5456	18.1	0	0	0	0	0	0	0	0	0	0	40.5714	0	3125
69	2	1	32	20.9998	24.9748	10.6	0	0	0	0	0	1	0	0	0	0	39.1429	0	3895
70	3	1	31	19.9481	26.3465	17	0	0	0	0	0	0	0	0	0	0	41.1429	0	3135
71	2	1	27	20.5457	26.5039	14.5	0	0	0	0	0	0	0	0	0	0	40.1429	0	2860
72	3	1	36	22.8928	28.7617	14.1	1	0	0	0	0	0	0	0	0	0	39.7143	0	3915
73	3	1	33	25.711	28.8754	8	0	0	0	0	0	0	0	0	0	0	40.8571	0	3235
74	4	0	34	28.3039	29.4693	2.8	0	0	0	0	0	0	1	0	0	1	34	1	2343
75	1	1	36	20.83	24.0346	8	1	0	0	0	1	0	1	0	1	0	37.8571	0	2925
76	4	0	30				0	1	0	0	0	0	1	0	0	0	36.4286	1
79	2	1	32	31.9214	33.3914	3.5	0	1	0	0	1	0	1	0	0	0	38.4286	0	3000
80	4	0	36	18.2423	21.6081	6.55	1	0	0	0	1	0	1	0	0	0	34.8571	1	2056
