# Supplementary material for: Bioinformatics Analysis of Oral, Vaginal, and Rectal Microbial Profiles during Pregnancy: A Pilot Study on the Bacterial Co-Residence in Pregnant Women
Source: Microorganisms. 2021 May 11;9(5):1027. doi: 10.3390/microorganisms9051027 (PMC8151423; doi:10.3390/microorganisms9051027)
Supplement: Supplementary file 1 [file microorganisms-09-01027-s001.zip › Table S4 Raw data of Fig 1,2 and 3.xlsx]

## Sheet: FIG1
index	vagina_1B	vagina_2B	vagina_3B	vagina_5B	vagina_7B	vagina_9B	vagina_10B	vagina_11B	vagina_12B	vagina_13B	vagina_14B	vagina_15B	vagina_16B	vagina_17B	vagina_18B	vagina_19B	vagina_21B	vagina_22B	vagina_23B	vagina_24B	vagina_25B	vagina_28B	vagina_29B	vagina_30B	vagina_31B	vagina_34B	vagina_35B	vagina_37B	vagina_38B	vagina_39B	vagina_40B	vagina_43B	vagina_45B	vagina_46B	vagina_47B	vagina_48B	vagina_49B	vagina_50B	vagina_52B	vagina_55B	vagina_57B	vagina_59B	vagina_60B	vagina_63B	vagina_64B	vagina_65B	vagina_67B	vagina_68B	vagina_69B
Patient No.	1	2	3	5	7	9	10	11	12	13	14	15	16	17	18	19	21	22	23	24	25	28	29	30	31	34	35	37	38	39	40	43	45	46	47	48	49	50	52	55	57	59	60	63	64	65	67	68	69
TPL	non.TPL	non.TPL	non.TPL	non.TPL	non.TPL	non.TPL	non.TPL	non.TPL	non.TPL	non.TPL	non.TPL	non.TPL	non.TPL	non.TPL	non.TPL	non.TPL	repeated.TPL	primary.TPL	non.TPL	primary.TPL	non.TPL	repeated.TPL	non.TPL	non.TPL	repeated.TPL	non.TPL	non.TPL	non.TPL	non.TPL	non.TPL	primary.TPL	non.TPL	non.TPL	non.TPL	non.TPL	primary.TPL	non.TPL	primary.TPL	non.TPL	primary.TPL	non.TPL	non.TPL	non.TPL	primary.TPL	non.TPL	non.TPL	non.TPL	non.TPL	non.TPL
CST	CST1	CST1	CST1	CST3	CST3	CST1	CST4	CST3	CST3	CST1	CST2	CST3	CST2	CST3	CST3	CST2	CST2	CST4	CST2	CST4	CST4	CST5	CST2	CST1	CST5	CST3	CST4	CST1	CST3	CST1	CST3	CST2	CST1	CST1	CST1	CST1	CST4	CST1	CST4	CST1	CST4	CST2	CST1	CST3	CST4	CST1	CST1	CST1	CST2
LD	LD	LD	LD	LD	LD	LD	non.LD	LD	LD	LD	LD	LD	LD	LD	LD	LD	LD	non.LD	LD	non.LD	non.LD	LD	LD	LD	LD	LD	non.LD	LD	LD	LD	LD	LD	LD	LD	LD	LD	non.LD	LD	non.LD	LD	non.LD	LD	LD	LD	non.LD	LD	LD	LD	LD
delivery.week	TB	TB	TB	TB	TB	TB	PTB	TB	TB	TB	TB	TB	TB	TB	TB	TB	TB	PTB	TB	PTB	TB	PTB	TB	TB	TB	TB	TB	TB	TB	TB	TB	TB	TB	TB	TB	PTB	TB	TB	TB	TB	TB	TB	TB	TB	TB	TB	TB	TB	TB
Lactobacillus iners AB-1 (s)	0	0	0	99.0722	99.1742	0	21.5124	77.1576	98.2561	2.19313	0.00712048	98.1911	0	99.1631	98.6905	0	0	0	0	0	0	0	0	0	0	98.0876	0	0	89.9252	0	98.8544	0.0918307	0	0	0	0	0	0.17381	0	0	0	0	0	87.0242	29.9348	0	0	1.20509	0
Lactobacillus gasseri (s)	0.444044	0	0	0.219956	0	1.0971	0	0.592529	0	0	40.3482	0.0952047	83.9939	0	0	94.8669	88.0806	0	82.2542	0	34.2928	0.0671051	60.1579	0	0	0	0	0	0	0	0.356775	98.6997	0	0	0	0	0	0	0	0	0	82.8382	0	0	0	0	0	0.02826	51.5132
Lactobacillus crispatus (s)	98.3268	70.3619	98.198	0	0	74.5832	0	17.7501	0	95.1311	0.256337	0	0	0	0	0	0	0	0.100105	0	0	0	0	98.5089	0	0	0	98.5681	0	84.295	0.0118925	0	98.9161	99.0382	49.8526	96.1168	0.0129859	77.327	0.0409968	98.9763	0	0	99.7921	0	0	99.461	99.8087	96.6209	0
Bifidobacterium (g)	0	0	0	0	0	0	0	0	0	0	0	0	0	0	0	0.664492	0	0	0	7.63018	0.0287829	1.10388	0	0	0.0254243	0	97.9001	0	0.0477732	13.6347	0	0	0	0	19.097	0	0	0.040679	0	0	0	2.6221	0	0	0	0	0	0	0
Lactobacillus jensenii (s)	1.06184	25.6596	0	0	0	0	0	0	0	0	0	0	0	0	0	0	0	0	3.49911	0	0	91.7796	0.0947202	0	73.6191	0	0	0	0	0	0	0	0	0	0	0.858233	0	0	0	0	0	0	0	0	0	0	0	0	0
Atopobium vaginae (s)	0	0	0	0	0	0.507555	4.16667	0	0	0	0	0	0	0	0	0	0	9.41835	2.81658	37.2462	63.1127	4.13032	0	0	0	0	0	0	0	0	0	0	0	0	0	0	9.18102	0	45.1902	0	46.9728	0	0	0	3.34032	0.0173857	0	0.04239	0.00870499
Streptococcus (g)	0	0	0	0	0	0	0	0	0	0.0154446	0	0	0	0.0159401	0	0	0	0	0.0364017	0	0	0	0	0	0	0	0	0	0	0	0	0	0	0	0	0	0	0	0.161059	0.0299057	0	0	0	0	0	0	0	0.0262414	0
Gardnerella uncultured bacterium (s)	0	0	0	0	0	19.4042	16.0664	0	0	0.880343	19.8021	0	0	0	0	0	0	29.0544	1.44242	0	0	0.0167763	34.2536	0	8.75548	0	0	0.0123442	0	0	0	0	0	0	0	0	27.1838	0	54.2476	0	20.7537	0	0	3.75127	35.3546	0	0	1.23335	17.645
Gardnerella (g)	0	0	0	0	0	0.843322	11.834	0	0	1.31279	36.2005	0	0	0	0	0	0	5.95759	3.1442	0	0	0	0	0	15.8266	0	0	0	0	0	0	0	0	0	0	0	46.1215	0	0	0	30.9488	0	0	5.38629	4.69041	0	0	0.24021	26.6895
Prevotella bivia (s)	0	0	0	0	0	0	31.1164	0	0	0	0	0	0	0	0	0	0	4.37297	0	0	0	0	0	0	0	0	0	0	0	0	0	0	0	0	0	0	0	0	0	0	0	0	0	2.62647	0	0	0	0	0
Streptococcus agalactiae (s)	0	0	0	0	0	0	0	0	0	0	0	0	0	0	0	0	0	0	0	0	0	0	0	0	0	0	0	0	0	0	0	0	0	0	0	0	0	0	0	0	0	0	0	0	0	0	0	0	0
Rhizobiaceae (f)	0	0.219855	0.598176	0.0839832	0.56247	0.714481	0.153347	2.07815	0.510576	0.370671	1.07163	0.360776	0.350799	0.414442	0.717117	1.0516	2.50083	0.0752339	2.31606	17.4573	1.18421	0.46638	0.217506	0.598712	0.429035	0.327249	0.546093	0.35798	3.03625	0.508392	0.384524	0.426095	0.413946	0.394445	1.04739	1.20788	0.233746	9.38575	0.0351401	0.140327	0.0197305	0.22226	0.15417	0.0869691	0	0	0.13169	0.143319	0
Aerococcus christensenii (s)	0	0	0	0	0	0	0.105152	0	0	0	0.0498433	0	0	0	0	0	0	1.70217	0.0364017	0	0	0	0	0	0	0	0	0	0	0	0	0	0	0	0	0	8.41918	0	0	0	0	9.28427	0	0	2.17644	0	0	0	0
Dialister unidentified (s)	0	0	0	0	0	1.12833	0.547669	0	0	0.0386115	0	0	15.2896	0	0	0	0.10783	0.71002	0	4.2701	0	0	0	0	0	0.0153398	0	0	0	0	0	0	0	0	0	0	0.627651	0	0	0	1.28812	0	0	0.240615	0.849628	0	0	0	2.25459
Prevotella_Chlamydia trachomatis (s)	0	0	0	0	0	0	0.714161	0	0	0	0	0	0	0	0	0	0	12.5312	0	0	0	0	0	0	0	0	0	0	0.0636976	0	0	0	0	0	0	0	0	0	0	0	0	0	0	0	2.48681	0	0	0	0.00580333
Lactobacillus sp. DJF_WC57 (s)	0	0	0	0	0	0	0	0	0	0	0	0	0	0	0	0	0	0	0	12.2072	0	0	0	0	0	0	0	0	0	0	0	0	0	0	0	0	0	0	0	0	0	0	0	0	0	0	0	0	0
Phyllobacterium (g)	0	0.101471	0.396291	0.195961	0.227382	0.437278	0	1.16359	0.119355	0	0.754771	0	0.0932975	0.362636	0.49441	0.621819	1.62575	0	1.58347	11.4318	0.785362	0.39592	0.0561305	0.353956	0.349584	0.138058	0.325055	0.201621	2.13918	0.159255	0.0792833	0.242433	0.298724	0.264765	0.63555	0.741683	0.0649294	6.65656	0	0.0575109	0	0.194126	0	0	0	0.0993468	0	0	0
Bifidobacterium breve (s)	0	0	0	0	0	0	0	0	0	0	0	0	0	0	0	1.31984	6.47395	0	0	2.13236	0	0.832103	0	0	0	0	0.630607	0	0	0.869778	0	0	0	0	11.206	0	0	0	0	0	0	0	0	0	0	0	0	0	0
Lactobacillus rhamnosus R0011 (s)	0	0	0	0	0	0	0	0	0	0	0	0	0	0	0	0	0	0	0	0	0	0	0	0	0	0	0	0	0	0	0	0	0	0	10.3315	0	0	0	0	0	0	0	0	0	0	0	0	0	0
Sneathia amnii (s)	0	0	0	0	0	0	0	0	0	0	0	0	0	0	0	0	0	10.3118	0	0	0	0	0	0	0	0	0	0	0	0	0	0	0	0	0	0	0	0	0	0	0	0	0	0	1.14836	0	0	0	0
uncultured Dialister sp. (s)	0	0	0	0	0	0	2.08552	0	0	0	0	0	0	0	0	0	0	0	0	0	0	0	0	0	0	0	0	0	0	0	0	0	0	0	0	0	8.12484	0	0	0	0	0	0	0	5.77281	0	0	0	0
Lactobacillus acidophilus NCFM (s)	0	0	0	0	0	0	0	0	0	0	0	0	0	0	0	0	0	0	0	0	0	0	0	0	0	0	0	0	0	0	0	0	0	0	6.87919	0	0	0	0	0	0	0	0	0	0	0	0	0	0
Veillonellaceae bacterium KA00182 (s)	0	0	0	0	0	0	0	0	0	0	0	0	0	0	0	0	0	5.3134	0	0	0	0	0	0	0	0	0	0	0	0	0	0	0	0	0	0	0	0	0	0	0	0	0	0	0	0	0	0	0
Prevotella colorans (s)	0	0	0	0	0	0	0.315457	0	0	0	0	0	0	0	0	0	0	5.16763	0	0	0	0	0	0	0	0	0	0	0	0	0	0	0	0	0	0	0	0	0	0	0	0	0	0	0	0	0	0	0
Prevotella amnii DSM 23384 = JCM 14753 (s)	0	0	0	0	0	0	0	0	0	0	0	0	0	0	0	0	0	0	0	0	0	0	0	0	0	0	0	0	0	0	0	0	0	0	0	0	0	0	0	0	0	0	0	0	5.03569	0	0	0	0
Lactobacillus vaginalis (s)	0	3.6572	0	0.259948	0	0	0	0	0	0	0.996867	0	0	0	0	0	0	0	0	0	0	0	4.9465	0	0	0	0	0	0	0	0	0	0	0	0	0	0	0	0	0	0	0	0	0	0	0.409806	0	0	0.728317
Sneathia sanguinegens (s)	0	0	0	0	0	0	4.10095	0	0	0	0	0	0	0	0	0	0	0	0	0	0	0	0	0	0	0	0	0	0	0	0	0	0	0	0	0	0	0	0	0	0	0	0	0	0.628492	0	0	0	0
Prevotella disiens JCM 6334 = ATCC 29426 (s)	0	0	0	0	0	0	0	0	0	0	0	0	0	0	0	0	0	3.59242	0	0	0	0	0	0	0	0	0	0	0	0	0	0	0	0	0	0	0	0	0	0	0	0	0	0	0	0	0	0	0
Pediococcus (g)	0	0	0	0	0	0	0	0	0	0	0	0	0	0	0	0.24385	0.402289	0	0	0	0	0	0	0	0	0	0	0	0	0	0	0	0	0	0	0	0	0	0	0	0	3.28607	0	0.0202928	0	0	0	0	0
Gardnerella vaginalis (s)	0	0	0	0	0	0	0	0	0	0	0	0	0	0	0	0	0	0	0	0	0	0	0	0	0	0	0	0	0	0	0	0	0	0	0	0	0	0	0	0	0	0	0	0	3.06487	0	0	0	0
Peptoniphilus coxii (s)	0	0	0	0	0	0	0	0	0	0	0	0	0	0	0	0	0	2.8824	0	0	0	0	0	0	0	0	0	0	0	0	0	0	0	0	0	0	0	0	0	0	0	0	0	0	0	0	0	0	0
Pseudomonas (g)	0	0	0	0	0	0	0	0	0	0	0	0	0	0	0	0.262139	0.0290312	0	0.332165	0.134618	0	0.171118	0.0245571	0.180743	0.136655	0	0.188532	0	0.928924	0.0735024	0.0554983	0.0550984	0.0981522	0.0864538	0.315233	0.354948	0	2.72549	0	0	0	0	0	0	0	0	0	0	0
Fastidiosipila uncultured bacterium (s)	0	0	0	0	0	0	0	0	0	0	0	0	0	0	0	0	0	0	0	0	0	0	0	0	0	0	0	0	0	0	0	0	0	0	0	0	0	0	0	0	0	0	0	0	2.33163	0	0	0	0
Anaerococcus tetradius ATCC 35098 (s)	0	0	0	0	0	0	1.28812	0	0	0	0	0	0	0	0	0	0	1.95608	0	0	0	0	0	0	0	0	0	0	0	0	0	0	0	0	0	0	0	0	0	0	0	0	0	0	0	0	0	0	0
Finegoldia (g)	0	0	0	0	0	0	0.766737	0	0	0	0	0	0	0	0	0	0	1.60813	0	0	0	0	0	0	0	0	0	0.0781796	0	0	0	0	0	0	0	0	0	0	0	0	0	0	0	0.0550804	0	0	0	0	0
Megasphaera (g)	0	0	0	0	0	0	1.38451	0	0	0	0	0	0	0	0	0	0	0	0	0.161542	0	0	0	0	0	0	0	0	0	0	0	0	0	0	0	0	0	0	0	0	0	0	0	0	0	0	0	0	0
Ureaplasma parvum serovar 6 str. ATCC 27818 (s)	0	0	0	0	0	0	0.0131441	0	0	0.050195	0	0	0	0	0	0	0	0	0.0455021	0	0	0	0	0	0	0.0869254	0	0	0	0	0	0	0.0213374	0	0	0	0	0	0	0.639522	0	0	0	0	0	0	0	0	0.835679
Lactobacillus coleohominis DSM 14060 (s)	0	0	0.519665	0	0	0	0	0.918849	0	0	0	1.33287	0	0	0	0	0	0	0	0	0	0	0	0	0	1.32945	0	0	0	0	0	0	0	0	0	0	0	0	0	0	0	0	0	0	0	0	0	0	0
Peptoniphilus (g)	0	0	0	0	0	0	1.33193	0	0	0	0.0213614	0	0	0	0	0	0	1.1097	0	0	0	0	0	0	0	0	0	0	0	0	0	0	0	0	0	0	0	0	0	0	0	0	0	0	0	0	0	0.0181671	0
Lactobacillus fermentum (s)	0	0	0	0	0	1.21032	0	0	0	0	0	0	0	0	0	0	0	0	0	0	0	0	0	0	0.266955	0	0	0	0	0	0	0	0	0	0	0	0	0	0	0	0	0	0	0	0	0	0	0	0
Burkholderia-Caballeronia-Paraburkholderia;__ (g)	0	0	0	0	0	0	0	0.0257621	0	0	0	0	0	0	0	0.143262	0.124419	0	0.0910042	1.20618	0.0370066	0.0167763	0	0	0.0158902	0	0	0	0.159244	0	0	0	0	0	0.0203376	0	0	0.0554713	0	0	0	0	0	0	0	0	0	0	0
Delftia (g)	0	0	0.0336474	0	0.0179512	0	0	0	0.179033	0	0.0356024	0	0	0	0.0489956	0	0.136861	0	0	1.11464	0.0287829	0	0	0	0	0	0	0	0	0	0	0	0	0	0	0	0	0	0	0	0	0	0	0	0	0	0	0	0
Cutibacterium (g)	0	0	0.0448632	0	0	0	0	0	0	0	0.121048	0	0	0	0	0	0.0248839	0	0	1.05541	0	0	0	0	0	0	0	0	0	0	0	0	0	0	0	0	0	0	0	0	0	0.0196939	0	0	0	0	0.00627097	0	0
others	0.167321	0	0.209361	0.167966	0.0179512	0.0741811	2.49737	0.313439	0.934951	0.00772231	0.334662	0.0200431	0.272429	0.0438352	0.0489956	0.826043	0.49353	4.23661	2.30241	3.9524	0.530428	1.02	0.249079	0.357721	0.575224	0.0153398	0.40957	0.781796	3.69977	0.45939	0.257671	0.484866	0.251782	0.216134	0.615213	0.720492	0.0303004	3.63522	0.325046	0.15643	0.0169119	1.53331	0.0537258	0.808813	3.18513	0.0124183	0.0533032	0.442067	0.319183
[truncated: 9 more columns]

## Sheet: FIG2A
index	saliva_70B	saliva_73B	saliva_11B	saliva_15B	saliva_34B	saliva_12B	saliva_72B	saliva_40B	saliva_5B	saliva_18B	saliva_17B	saliva_7B	saliva_38B	saliva_63B	saliva_39B	saliva_30B	saliva_37B	saliva_47B	saliva_2B	saliva_3B	saliva_50B	saliva_13B	saliva_68B	saliva_45B	saliva_65B	saliva_1B	saliva_48B	saliva_9B	saliva_67B	saliva_75B	saliva_55B	saliva_46B	saliva_60B	saliva_19B	saliva_43B	saliva_16B	saliva_59B	saliva_21B	saliva_23B	saliva_14B	saliva_69B	saliva_29B	saliva_71B	saliva_79B	saliva_28B	saliva_31B	saliva_35B	saliva_52B	saliva_57B
D_0__Bacteria;D_1__Acidobacteria;D_2__Acidobacteriia;D_3__Acidobacteriales;D_4__uncultured;__	0	0	0	0	0	0	0	0	0	0	0	0	0	0	0	0	0	0	0	0	0	0	0	0	0	0	0	0	0	0	0	0	0	0	0	0	0	0	0	0	0	0	0	0	0	0	0	0	0
D_0__Bacteria;D_1__Acidobacteria;D_2__Blastocatellia (Subgroup 4);D_3__Blastocatellales;D_4__Blastocatellaceae;D_5__Blastocatella	0	0	0	0	0	0	0	0	0	0	0	0	0	0	0	0	0	0	0	0	0	0	0	0	0	0	0	0	0	0	0	0	0	0	0	0	0	0	0	0	0	0	0	0	0	0	0	0	0
D_0__Bacteria;D_1__Acidobacteria;D_2__Blastocatellia (Subgroup 4);D_3__Blastocatellales;D_4__Blastocatellaceae;D_5__uncultured	0	0	0	0	0	0	0	0	0	0	0	0	0	0	0	0	0	0	0	0	0	0	0	0	0	0	0	0	0	0	0	0	0	0	0	0	0	0	0	0	0	0	0	0	0	0	0	0	0
D_0__Bacteria;D_1__Acidobacteria;D_2__Subgroup 18;D_3__uncultured bacterium;D_4__uncultured bacterium;D_5__uncultured bacterium	0	0	0	0	0	0	0	0	0	0	0	0	0	0	0	0	0	0	0	0	0	0	0	0	0	0	0	0	0	0	0	0	0	0	0	0	0	0	0	0	0	0	0	0	0	0	0	0	0
D_0__Bacteria;D_1__Acidobacteria;D_2__Subgroup 6;D_3__uncultured bacterium 259;D_4__uncultured bacterium 259;D_5__uncultured bacterium 259	0	0	0	0	0	0	0	0	0	0	0	0	0	0	0	0	0	0	0	0	0	0	0	0	0	0	0	0	0	0	0	0	0	0	0	0	0	0	0	0	0	0	0	0	0	0	0	0	0
D_0__Bacteria;D_1__Actinobacteria;D_2__Acidimicrobiia;D_3__Microtrichales;D_4__Ilumatobacteraceae;D_5__uncultured	0	0	0	0	0	0	0	0	0	0	0	0	0	0	0	0	0	0	0	0	0	0	0	0	0	0	0	0	0	0	0	0	0	0	0	0	0	0	0	0	0	0	0	0	0	0	0	0	0
D_0__Bacteria;D_1__Actinobacteria;D_2__Actinobacteria;D_3__Actinomycetales;D_4__Actinomycetaceae;D_5__Actinobaculum	0	0	0	0	0	0	0	0	0	0	0	0	0	0	0	0	0	0	0	0	0	0	0	0	0	0	0	0	0	0	0	0	0	0	0	0	0	0	0	0	0	0	0	0	0	0	0	0	0
D_0__Bacteria;D_1__Actinobacteria;D_2__Actinobacteria;D_3__Actinomycetales;D_4__Actinomycetaceae;D_5__Actinomyces	9.85764	3.81598	5.32099	13.2608	5.00535	10.048	10.3671	3.40396	5.25053	4.26763	4.59624	5.65202	6.40976	8.92155	5.77528	5.60278	8.16631	5.86685	5.54808	9.24921	7.66644	6.77988	6.94999	3.187	10.2374	14.0922	5.94159	5.48252	4.59831	11.3919	11.4792	7.44668	8.20695	4.45816	8.11961	4.79141	9.22248	5.96789	8.48009	9.70586	8.54598	5.50937	6.03796	3.30348	9.05898	7.00241	6.57571	9.22652	8.24967
D_0__Bacteria;D_1__Actinobacteria;D_2__Actinobacteria;D_3__Actinomycetales;D_4__Actinomycetaceae;D_5__Actinotignum	0	0	0	0	0	0	0	0	0	0	0	0	0	0	0	0	0	0	0	0	0	0	0	0	0	0	0	0	0	0	0	0	0	0	0	0	0	0	0	0	0	0	0	0	0	0	0	0	0
D_0__Bacteria;D_1__Actinobacteria;D_2__Actinobacteria;D_3__Actinomycetales;D_4__Actinomycetaceae;D_5__Arcanobacterium	0	0	0	0	0	0	0	0	0	0	0	0	0	0	0	0	0	0	0	0	0	0	0	0	0	0	0	0	0	0	0	0	0	0	0	0	0	0	0	0	0	0	0	0	0	0	0	0	0
D_0__Bacteria;D_1__Actinobacteria;D_2__Actinobacteria;D_3__Actinomycetales;D_4__Actinomycetaceae;D_5__F0332	0.020145	0.0677966	0	0.188096	0.200749	0.152	0.0791384	0	0.138014	0.190803	0.323768	0	0.0441672	0.088114	0.280465	0.136932	0.127932	0	0.168294	0.0723654	0.342361	0.188692	0.134546	0	0.0829503	0.149218	0.0294429	0	0.0646044	0.0961564	0.163132	0.0898634	0.0474939	0.0317792	0	0	0.0818146	0	0.063067	0.054615	0	0.0606759	0.0454959	0.562365	0.0677883	0	0.283574	0	0.0342957
D_0__Bacteria;D_1__Actinobacteria;D_2__Actinobacteria;D_3__Actinomycetales;D_4__Actinomycetaceae;D_5__Mobiluncus	0.130943	0.00968523	0	0	0	0	0.316554	0	0	0	0	0.0415081	0	0	0	0	0	0.0526963	0	0.167345	0.0855903	0	0	0	0.172813	0	0.0176658	0	0	1.19661	0.25968	0.053918	0.123484	0	0	0	0	1.91773	0	0	0	0	0.142987	0	0	0.0668807	0	0	0
D_0__Bacteria;D_1__Actinobacteria;D_2__Actinobacteria;D_3__Actinomycetales;D_4__Actinomycetaceae;D_5__Varibaculum	0	0	0	0	0	0	0	0	0	0	0	0	0	0	0	0	0	0	0	0	0	0	0	0	0	0	0	0	0	0	0	0	0	0	0	0	0	0	0	0	0	0	0	0	0	0	0	0	0
D_0__Bacteria;D_1__Actinobacteria;D_2__Actinobacteria;D_3__Bifidobacteriales;D_4__Bifidobacteriaceae;D_5__Aeriscardovia	0.0302176	0	0	0	0	0	0	0	0	0	0	0	0	0	0	0	0	0	0	0	0	0	0	0	0	0	0	0	0	0	0	0	0	0	0	0	0	0	0	0	0	0	0	0	0	0	0	0	0
D_0__Bacteria;D_1__Actinobacteria;D_2__Actinobacteria;D_3__Bifidobacteriales;D_4__Bifidobacteriaceae;D_5__Alloscardovia	0	0	0	0	0	0.272	0	0	0	0	0	0	0	0	0	0	0	0	0	0	0	0	0	0	0.0380189	0.0895309	0	0	0	0	0	0	0	0	0	0	0	0.0829552	0	0	0	0	0	0	0	0	0	0	0
D_0__Bacteria;D_1__Actinobacteria;D_2__Actinobacteria;D_3__Bifidobacteriales;D_4__Bifidobacteriaceae;D_5__Bifidobacterium	0.275316	0.171106	0.0132914	0	0	0	0.0240856	0	0.0420042	0	0	0	0	0.280077	0	0	0	0	0	0	0	0	0.528904	0	0	0.799809	0	0.121984	0	0	0	0	0	0	0.0678175	0	0	0	0.291078	0	0.0957416	0	0	0.18521	0	0	0.192616	0	0.00623558
D_0__Bacteria;D_1__Actinobacteria;D_2__Actinobacteria;D_3__Bifidobacteriales;D_4__Bifidobacteriaceae;D_5__Gardnerella	0.020145	0	0	0	0.0200749	0	0	0	0	0	0	0	0	0	0	0	0	0	0	0	0	0	0	0	0	0	0	0	0	0	0	0	0	0	0	0	0	0	0	0	0.0208134	0	0	0	0	0	0	0	0
D_0__Bacteria;D_1__Actinobacteria;D_2__Actinobacteria;D_3__Bifidobacteriales;D_4__Bifidobacteriaceae;D_5__Parascardovia	0	0	0	0	0	0	0	0	0	0	0	0	0	0	0	0	0	0	0	0	0	0	0.394358	0	0	0	0	0.0948767	0	0.00534202	0	0	0	0	0.0246609	0	0	0	0.121283	0	0	0	0	0	0	0	0	0	0
D_0__Bacteria;D_1__Actinobacteria;D_2__Actinobacteria;D_3__Bifidobacteriales;D_4__Bifidobacteriaceae;D_5__Scardovia	0.0637926	0.071025	0.0265828	0	0.0334582	0	0	0	0	0.0190803	0	0	0	0	0	0	0	0	0	0.0587969	0	0.266771	0.125267	0	0	0	0	0	0.0304021	0	0	0	0	0	0	0	0	0	0.616116	0	0.0416268	0.133487	0	0.0538793	0	0	0	0	0
D_0__Bacteria;D_1__Actinobacteria;D_2__Actinobacteria;D_3__Corynebacteriales;D_4__Corynebacteriaceae;D_5__Corynebacterium	0.0604351	1.65295	0.589252	1.41744	1.72645	1.624	1.06321	0.0877633	1.0321	0.426127	0.330117	1.25216	1.50168	0.730088	1.17337	0.861528	1.00924	0.415715	0.914395	0.280416	1.38167	0.598608	0.357242	0.236074	0.829503	0.316342	0.518196	1.9653	1.35669	0.625017	0.38952	0.413372	0.123484	0.408589	0	0.226723	0	0.351339	0.989667	1.16252	0.42043	0.345853	0.360718	1.31331	0.714858	0.428036	0.765115	0.513555	0.576791
D_0__Bacteria;D_1__Actinobacteria;D_2__Actinobacteria;D_3__Corynebacteriales;D_4__Corynebacteriaceae;D_5__Corynebacterium 1	0	0	0	0	0	0	0	0	0	0	0	0	0	0	0	0	0	0	0	0	0	0	0	0	0	0	0	0	0	0	0	0	0	0	0	0	0	0	0.0776209	0	0	0	0	0	0	0	0	0	0
D_0__Bacteria;D_1__Actinobacteria;D_2__Actinobacteria;D_3__Corynebacteriales;D_4__Corynebacteriaceae;D_5__Corynebacterium sp. NML 100378	0	0	0	0	0	0	0	0	0	0	0	0	0	0	0	0	0	0	0	0	0	0	0	0	0	0	0	0	0	0	0	0	0	0	0	0	0	0	0	0	0	0	0	0	0	0	0	0	0
D_0__Bacteria;D_1__Actinobacteria;D_2__Actinobacteria;D_3__Corynebacteriales;D_4__Corynebacteriaceae;D_5__Lawsonella	0	0	0	0	0	0	0	0	0	0	0	0	0	0	0	0	0	0	0	0	0	0	0	0	0	0	0	0	0	0	0	0	0	0	0	0	0	0	0	0	0	0	0	0	0	0	0	0	0
D_0__Bacteria;D_1__Actinobacteria;D_2__Actinobacteria;D_3__Corynebacteriales;D_4__Mycobacteriaceae;D_5__Mycobacterium	0	0	0	0	0	0	0	0	0	0	0	0	0	0	0	0	0	0	0	0	0	0	0	0	0	0	0	0	0	0	0	0	0	0	0	0	0	0	0	0	0	0	0	0	0	0	0	0	0
D_0__Bacteria;D_1__Actinobacteria;D_2__Actinobacteria;D_3__Corynebacteriales;D_4__Nocardiaceae;D_5__Nocardia	0	0	0	0	0	0	0	0	0	0	0	0	0	0	0	0	0	0	0	0	0	0	0	0	0	0	0	0	0	0	0	0	0	0	0	0	0	0	0	0	0	0	0	0	0	0	0	0	0
D_0__Bacteria;D_1__Actinobacteria;D_2__Actinobacteria;D_3__Corynebacteriales;D_4__Nocardiaceae;D_5__Rhodococcus	0	0	0	0	0	0	0	0	0	0	0	0	0	0	0	0	0	0	0	0	0	0	0	0	0	0.0358123	0	0	0	0	0	0	0	0	0	0	0	0	0	0	0	0	0	0	0	0	0	0	0
D_0__Bacteria;D_1__Actinobacteria;D_2__Actinobacteria;D_3__Corynebacteriales;D_4__Nocardiaceae;D_5__Williamsia	0	0	0	0	0	0	0	0	0	0	0	0	0	0	0	0	0	0	0	0	0	0	0	0	0	0	0	0	0	0	0	0	0	0	0	0	0	0	0	0	0	0	0	0	0	0	0	0	0
D_0__Bacteria;D_1__Actinobacteria;D_2__Actinobacteria;D_3__Frankiales;D_4__Geodermatophilaceae;D_5__Blastococcus	0	0	0	0	0	0	0	0	0	0	0	0	0	0	0	0	0	0	0	0	0	0	0	0	0	0	0	0	0	0	0	0	0	0	0	0	0	0	0	0	0	0	0	0	0	0	0	0	0
D_0__Bacteria;D_1__Actinobacteria;D_2__Actinobacteria;D_3__Frankiales;D_4__Geodermatophilaceae;D_5__Geodermatophilus	0	0	0	0	0	0	0	0	0	0	0	0	0.0110418	0	0	0	0	0	0	0	0	0	0	0	0	0	0	0	0	0	0	0	0	0	0	0	0	0	0	0	0	0	0	0	0	0	0	0	0
D_0__Bacteria;D_1__Actinobacteria;D_2__Actinobacteria;D_3__Frankiales;D_4__Geodermatophilaceae;D_5__Modestobacter	0	0	0	0	0	0	0	0	0	0	0	0	0	0	0	0	0	0	0	0	0	0	0	0	0	0	0	0	0	0	0	0	0	0	0	0	0	0	0	0	0	0	0	0	0	0	0	0	0
D_0__Bacteria;D_1__Actinobacteria;D_2__Actinobacteria;D_3__Frankiales;D_4__uncultured;D_5__uncultured bacterium	0	0	0	0	0	0	0	0	0	0	0	0	0	0	0	0	0	0	0	0	0	0	0	0	0	0	0	0	0	0	0	0	0	0	0	0	0	0	0	0	0	0	0	0	0	0	0	0	0
D_0__Bacteria;D_1__Actinobacteria;D_2__Actinobacteria;D_3__Kineosporiales;D_4__Kineosporiaceae;D_5__Kineosporia	0	0	0	0	0	0	0	0	0	0	0	0	0	0	0	0	0	0	0	0	0	0	0	0	0	0	0	0	0	0	0	0	0	0	0	0	0	0	0	0	0	0	0	0	0	0	0	0	0
D_0__Bacteria;D_1__Actinobacteria;D_2__Actinobacteria;D_3__Micrococcales;D_4__Beutenbergiaceae;__	0	0	0	0	0	0	0	0	0	0	0	0	0	0	0	0	0	0	0	0	0	0	0	0	0	0	0	0	0	0	0	0	0	0	0	0	0	0	0	0	0	0	0	0	0	0	0	0	0
D_0__Bacteria;D_1__Actinobacteria;D_2__Actinobacteria;D_3__Micrococcales;D_4__Brevibacteriaceae;D_5__Brevibacterium	0	0	0	0	0	0	0	0	0	0	0	0	0	0	0	0	0	0	0	0	0	0	0	0	0	0	0	0	0	0	0	0	0	0	0	0	0	0	0	0	0	0	0	0	0	0	0	0	0
D_0__Bacteria;D_1__Actinobacteria;D_2__Actinobacteria;D_3__Micrococcales;D_4__Dermabacteraceae;D_5__Dermabacter	0	0	0	0	0	0	0	0	0	0	0	0	0	0	0	0	0	0	0	0	0	0	0	0	0	0	0	0	0	0	0	0	0	0	0	0	0	0	0	0	0	0	0	0	0	0	0	0	0
D_0__Bacteria;D_1__Actinobacteria;D_2__Actinobacteria;D_3__Micrococcales;D_4__Dermacoccaceae;D_5__Kytococcus	0	0	0	0	0	0	0	0	0	0	0	0	0	0	0	0	0	0	0	0	0	0	0	0	0	0	0	0	0	0	0	0	0	0	0	0	0	0	0	0	0	0	0	0	0	0	0	0	0
D_0__Bacteria;D_1__Actinobacteria;D_2__Actinobacteria;D_3__Micrococcales;D_4__Intrasporangiaceae;D_5__Tetrasphaera	0	0	0	0	0	0	0	0	0	0	0	0	0	0	0	0	0	0	0	0	0	0	0	0	0	0	0	0	0	0	0	0	0	0	0	0	0	0	0	0	0	0	0	0	0	0	0	0	0
D_0__Bacteria;D_1__Actinobacteria;D_2__Actinobacteria;D_3__Micrococcales;D_4__Intrasporangiaceae;__	0	0	0	0	0	0	0	0	0	0	0	0	0	0	0	0	0	0	0	0	0	0	0	0	0	0.0119374	0	0	0	0	0	0	0	0	0	0	0	0	0	0	0	0	0	0	0	0	0	0	0
D_0__Bacteria;D_1__Actinobacteria;D_2__Actinobacteria;D_3__Micrococcales;D_4__Microbacteriaceae;D_5__Leifsonia	0	0	0	0	0	0	0	0	0	0	0	0	0	0	0	0	0	0	0	0	0	0	0	0	0	0	0	0	0	0	0	0	0	0	0	0	0	0	0	0	0	0	0	0	0	0	0	0	0
D_0__Bacteria;D_1__Actinobacteria;D_2__Actinobacteria;D_3__Micrococcales;D_4__Microbacteriaceae;D_5__Microbacterium	0	0	0	0	0	0	0	0	0	0	0	0	0	0	0	0	0	0	0	0	0	0	0	0	0	0.0238749	0	0	0	0	0	0	0	0	0	0	0	0	0	0	0	0	0	0	0	0	0	0	0
D_0__Bacteria;D_1__Actinobacteria;D_2__Actinobacteria;D_3__Micrococcales;D_4__Microbacteriaceae;D_5__Pseudoclavibacter	0	0	0	0	0	0	0	0	0	0	0	0	0	0	0	0	0	0	0	0	0	0	0	0	0	0	0	0	0	0	0	0	0	0	0	0	0	0	0	0	0	0	0	0	0	0	0	0	0
D_0__Bacteria;D_1__Actinobacteria;D_2__Actinobacteria;D_3__Micrococcales;D_4__Micrococcaceae;D_5__Arthrobacter	0	0	0	0	0	0	0	0	0	0	0	0	0	0	0	0	0	0	0	0	0	0	0	0	0	0	0	0	0	0	0	0	0	0	0	0	0	0	0	0	0	0	0	0	0	0	0	0	0
D_0__Bacteria;D_1__Actinobacteria;D_2__Actinobacteria;D_3__Micrococcales;D_4__Micrococcaceae;D_5__Kocuria	0	0	0	0	0	0	0	0	0	0	0	0	0	0	0	0	0	0	0	0	0	0	0	0	0	0	0	0	0	0	0	0	0	0	0	0	0	0	0	0	0	0	0	0	0	0	0	0	0
D_0__Bacteria;D_1__Actinobacteria;D_2__Actinobacteria;D_3__Micrococcales;D_4__Micrococcaceae;D_5__Micrococcus	0	0	0	0	0	0	0	0	0	0	0	0	0	0	0	0	0	0	0	0	0	0	0	0	0	0	0	0	0	0	0	0	0	0	0	0	0	0	0	0	0	0	0	0	0	0	0	0	0
D_0__Bacteria;D_1__Actinobacteria;D_2__Actinobacteria;D_3__Micrococcales;D_4__Micrococcaceae;D_5__Nesterenkonia	0	0	0	0	0	0	0	0	0	0	0	0	0	0	0	0	0	0	0	0	0	0	0	0	0	0	0	0	0	0	0	0	0	0	0	0	0	0	0	0	0	0	0	0	0	0	0	0	0
D_0__Bacteria;D_1__Actinobacteria;D_2__Actinobacteria;D_3__Micrococcales;D_4__Micrococcaceae;D_5__Rothia	0.18802	1.52704	0.416464	5.62273	4.05514	12.128	2.5806	3.27859	2.26223	0.858615	2.60284	3.70114	1.717	6.30959	2.10062	0.604781	1.73419	3.16178	2.47391	0.841248	3.78431	3.76082	2.14345	1.04547	2.18436	2.88289	1.94323	0.955544	1.86973	0.852053	1.07867	0.658998	1.70345	2.03387	1.00493	1.39813	2.982	0.273264	3.73066	2.87119	5.83191	6.7957	2.66476	0.976562	1.92888	1.43793	4.79401	5.07267	1.72726
D_0__Bacteria;D_1__Actinobacteria;D_2__Actinobacteria;D_3__Micrococcales;D_4__Micrococcaceae;__	0	0	0	0	0	1.48	0	0	0	0	0	0	0	0	0	0	0	0	0	0	0	0	0	0	0	0.799809	0	0	0	0	0	0	0	0	0	0	0	0	0	0	0	0	0	0	0	0	0	0	0
D_0__Bacteria;D_1__Actinobacteria;D_2__Actinobacteria;D_3__Micrococcales;__;__	0	0	0	0	0	0	0	0	0	0	0	0	0	0	0	0	0	0	0	0	0	0	0	0	0	0	0	0	0	0	0	0	0	0	0	0	0	0	0	0	0	0	0	0	0	0	0	0	0
D_0__Bacteria;D_1__Actinobacteria;D_2__Actinobacteria;D_3__Micromonosporales;D_4__Micromonosporaceae;__	0	0	0	0	0	0	0	0	0	0	0	0	0	0	0	0	0	0	0	0	0	0	0	0	0	0.23278	0	0	0	0	0	0	0	0	0	0	0	0	0	0	0	0	0	0	0	0	0	0	0
D_0__Bacteria;D_1__Actinobacteria;D_2__Actinobacteria;D_3__Propionibacteriales;D_4__Nocardioidaceae;D_5__Nocardioides	0	0	0	0	0	0	0	0	0	0	0	0	0	0	0	0	0	0	0	0	0	0	0	0	0	0	0	0	0	0	0	0	0	0	0	0	0	0	0	0	0	0	0	0	0	0	0	0	0
D_0__Bacteria;D_1__Actinobacteria;D_2__Actinobacteria;D_3__Propionibacteriales;D_4__Propionibacteriaceae;D_5__Aestuariimicrobium	0	0.26473	0	0	0.347966	0	0.21333	0	0	0	0	0	0	0	0	0	0	0	0	0	0	0	0	0.0786915	0	0	0	0	0	0	0	0	0.0284963	0	0	0	0	0	0	0	0	0	0	0	0	0	0.0374532	0	0.38037
D_0__Bacteria;D_1__Actinobacteria;D_2__Actinobacteria;D_3__Propionibacteriales;D_4__Propionibacteriaceae;D_5__Cutibacterium	0	0.0322841	0	0	0	0.08	0	0	0	0	0.0253936	0.0276721	0.0331254	0	0	0	0	0	0	0	0	0	0	0	0.013825	0	0	0	0	0	0	0	0	0	0	0	0	0	0	0	0	0.0364056	0	0	0	0	0	0	0
D_0__Bacteria;D_1__Actinobacteria;D_2__Actinobacteria;D_3__Propionibacteriales;D_4__Propionibacteriaceae;D_5__Microlunatus	0	0	0	0	0	0	0	0	0	0	0	0	0	0	0	0	0	0	0	0	0	0	0	0	0	0	0	0	0	0	0	0	0	0	0	0	0	0	0	0	0	0	0	0	0	0	0	0	0
D_0__Bacteria;D_1__Actinobacteria;D_2__Actinobacteria;D_3__Propionibacteriales;D_4__Propionibacteriaceae;D_5__Propionibacterium	0.0872952	0	0	0.0738949	0	0	0	0	0.060006	0.0190803	0	0	0	0.00944079	0	0	0.0710732	0	0	0	0	0	0.0278371	0	0.114057	0	0	0	0	0	0	0	0	0	0	0	0	0	0.0727696	0	0	0	0	0	0	0	0	0	0.0904159
D_0__Bacteria;D_1__Actinobacteria;D_2__Actinobacteria;D_3__Propionibacteriales;D_4__Propionibacteriaceae;D_5__Propionicicella	0	0	0	0	0	0	0	0	0	0	0	0	0	0	0	0	0	0	0	0	0	0	0	0	0	0	0	0	0	0	0	0	0	0	0	0	0	0	0	0	0	0	0	0	0	0	0	0	0
D_0__Bacteria;D_1__Actinobacteria;D_2__Actinobacteria;D_3__Propionibacteriales;D_4__Propionibacteriaceae;D_5__Propioniciclava	0	0	0	0	0	0	0	0	0	0	0	0	0	0	0	0	0	0	0	0	0	0	0	0	0	0	0	0	0	0	0	0	0	0	0	0	0	0	0	0	0	0	0	0	0	0	0	0	0
D_0__Bacteria;D_1__Actinobacteria;D_2__Actinobacteria;D_3__Propionibacteriales;D_4__Propionibacteriaceae;D_5__Propionimicrobium	0	0	0	0	0	0	0	0	0	0	0	0	0	0	0	0	0	0	0	0	0	0	0	0	0	0	0	0	0	0	0	0	0	0	0	0	0	0	0	0	0	0	0	0	0	0	0	0	0
D_0__Bacteria;D_1__Actinobacteria;D_2__Actinobacteria;D_3__Propionibacteriales;D_4__Propionibacteriaceae;D_5__Pseudopropionibacterium	0.01343	0.232446	0.181649	0.221685	0.44834	0.336	0.233974	0	0.114011	0.0826814	0.311072	0	0.281566	0.0660855	0.240398	0.11411	0.142146	0.158089	0.482441	0.0723654	0.195635	0	0	0.34287	0.186638	0.0179062	0.471087	0.0542152	0.494034	0.146906	0.239704	0.0718907	0	0.222454	0.0493218	0.0982467	0.112848	0.0634363	0.101877	0.202856	0.366316	0	0.344469	0.619612	0.0246503	0.0601926	0.321027	0.0349357	0.137183
D_0__Bacteria;D_1__Actinobacteria;D_2__Actinobacteria;D_3__Propionibacteriales;D_4__Propionibacteriaceae;__	0	0	0	0	0	0	0	0	0	0	0	0	0	0	0	0	0	0	0	0	0	0	0	0	0	0	0	0	0	0	0	0	0	0	0	0	0	0	0	0	0	0	0	0	0	0	0	0	0
D_0__Bacteria;D_1__Actinobacteria;D_2__Actinobacteria;D_3__Pseudonocardiales;D_4__Pseudonocardiaceae;D_5__Amycolatopsis	0	0	0	0	0	0	0	0	0	0	0	0	0	0	0	0	0	0	0	0	0	0	0	0	0	0	0	0	0	0	0	0	0	0	0	0	0	0	0	0	0	0	0	0	0	0	0	0	0
D_0__Bacteria;D_1__Actinobacteria;D_2__Actinobacteria;D_3__Pseudonocardiales;D_4__Pseudonocardiaceae;D_5__Pseudonocardia	0	0	0	0	0	0	0	0	0	0	0	0	0	0	0	0	0	0	0	0	0	0	0	0	0	0	0	0	0	0	0	0	0	0	0	0	0	0	0	0	0	0	0	0	0	0	0	0	0
D_0__Bacteria;D_1__Actinobacteria;D_2__Actinobacteria;D_3__Pseudonocardiales;D_4__Pseudonocardiaceae;__	0	0	0	0	0	0	0	0	0	0	0	0	0	0	0	0	0	0	0	0	0	0	0	0	0	0	0	0	0	0	0	0	0	0	0	0	0	0	0	0	0	0	0	0	0	0	0	0	0
D_0__Bacteria;D_1__Actinobacteria;D_2__Actinobacteria;__;__;__	0	0	0	0	0	0	0	0	0.69607	0	0	0	0	0	0	0	0	0	0.482441	0	0	0	0	0	0	0	0	0	0.197613	0	0	0	0	0.181595	0.203453	0	0.349828	0	0	0	0	0	0	0.639817	0	0	0	0	0.00623558
D_0__Bacteria;D_1__Actinobacteria;D_2__Coriobacteriia;D_3__Coriobacteriales;D_4__Atopobiaceae;D_5__Atopobium	0.671501	0.619855	0.305702	0.275427	0.153908	0	0.309672	0.112839	0.492049	1.64091	0.730066	0	0.0496881	0.720647	0.21178	0.148343	0.668088	0.146379	0.51049	0.524649	0.103931	0.227731	2.64916	0.20797	0.76729	0.489435	0.217878	0.487937	0.30022	0.774593	0.675833	0.778816	0.62692	0.199755	1.20222	0.3552	1.79146	0.985702	0.635521	0.358898	0.907464	0.133487	0.471208	0.0774515	0.154064	0.428036	0.0374532	1.12144	0.283719
D_0__Bacteria;D_1__Actinobacteria;D_2__Coriobacteriia;D_3__Coriobacteriales;D_4__Atopobiaceae;D_5__Coriobacteriaceae UCG-002	0	0	0	0	0	0	0	0	0	0	0	0	0	0	0	0	0	0	0	0	0	0	0	0	0	0	0	0	0	0	0	0	0	0	0	0	0	0	0	0	0	0	0	0	0	0	0	0	0
D_0__Bacteria;D_1__Actinobacteria;D_2__Coriobacteriia;D_3__Coriobacteriales;D_4__Atopobiaceae;D_5__Olsenella	0.241741	0.0258273	0	0.0335886	0	0	0.0206448	0	0.132013	0	0.031742	0	0	0.0157347	0	0	0.0710732	0	0	0	0.0489087	0.169172	0.259813	0.0730707	0.0276501	0	0	0.338845	0.0228016	0.219023	0	0.0119818	0	0	0.0554871	0	0.0169272	0	0.232863	0	0.012488	0.0242704	0	0.0471444	0.0123251	0	0.0374532	0.0209614	0.0249423
D_0__Bacteria;D_1__Actinobacteria;D_2__Coriobacteriia;D_3__Coriobacteriales;D_4__Coriobacteriaceae;D_5__Collinsella	0	0	0	0	0	0	0.0378488	0	0	0	0	0	0	0	0	0	0	0	0	0	0	0	0	0	0	0	0	0	0	0	0	0	0	0	0	0	0	0	0	0	0	0	0	0	0	0	0	0	0
D_0__Bacteria;D_1__Actinobacteria;D_2__Coriobacteriia;D_3__Coriobacteriales;D_4__Coriobacteriaceae;D_5__Enorma	0	0	0	0	0	0	0	0	0	0	0	0	0	0	0	0	0	0	0	0	0	0	0	0	0	0	0	0	0	0	0	0	0	0	0	0	0	0	0	0	0	0	0	0	0	0	0	0	0
D_0__Bacteria;D_1__Actinobacteria;D_2__Coriobacteriia;D_3__Coriobacteriales;D_4__Coriobacteriales Incertae Sedis;D_5__Raoultibacter	0	0	0	0	0	0	0	0	0	0	0	0	0	0	0	0	0	0	0	0	0	0	0	0	0	0	0	0	0	0	0	0	0	0	0	0	0	0	0	0	0	0	0	0	0	0	0	0	0
D_0__Bacteria;D_1__Actinobacteria;D_2__Coriobacteriia;D_3__Coriobacteriales;D_4__Coriobacteriales Incertae Sedis;D_5__uncultured	0	0	0	0	0	0	0	0	0	0	0	0	0	0	0	0	0	0	0	0	0	0	0	0	0	0	0	0	0	0	0	0	0	0	0	0	0	0	0	0	0	0	0	0	0	0	0	0	0
D_0__Bacteria;D_1__Actinobacteria;D_2__Coriobacteriia;D_3__Coriobacteriales;D_4__Coriobacteriales Incertae Sedis;__	0	0	0	0	0	0	0	0	0	0	0	0	0	0	0	0	0	0	0	0	0	0	0	0	0	0	0	0	0	0	0	0	0	0	0	0	0	0	0	0	0	0	0	0	0	0	0	0	0
D_0__Bacteria;D_1__Actinobacteria;D_2__Coriobacteriia;D_3__Coriobacteriales;D_4__Eggerthellaceae;D_5__Adlercreutzia	0	0	0	0	0	0	0	0	0	0	0	0	0	0	0	0	0	0	0	0	0	0	0	0	0	0	0	0	0	0	0	0	0	0	0	0	0	0	0	0	0	0	0	0	0	0	0	0	0
D_0__Bacteria;D_1__Actinobacteria;D_2__Coriobacteriia;D_3__Coriobacteriales;D_4__Eggerthellaceae;D_5__CHKCI002	0	0	0	0	0	0	0	0	0	0	0	0	0	0	0	0	0	0	0	0	0	0	0	0	0	0	0	0	0	0	0	0	0	0	0	0	0	0	0	0	0	0	0	0	0	0	0	0	0
D_0__Bacteria;D_1__Actinobacteria;D_2__Coriobacteriia;D_3__Coriobacteriales;D_4__Eggerthellaceae;D_5__DNF00809	0	0	0	0	0	0	0	0	0	0	0	0	0	0	0	0	0	0	0	0	0	0	0	0	0	0	0	0	0	0	0	0	0	0	0	0	0	0	0	0	0	0	0	0	0	0	0	0	0
D_0__Bacteria;D_1__Actinobacteria;D_2__Coriobacteriia;D_3__Coriobacteriales;D_4__Eggerthellaceae;D_5__Eggerthella	0	0	0	0	0	0	0	0	0	0	0	0	0	0	0	0	0	0	0	0	0	0	0	0	0	0	0	0	0	0	0	0	0	0	0	0	0	0	0	0	0	0	0	0	0	0	0	0	0
D_0__Bacteria;D_1__Actinobacteria;D_2__Coriobacteriia;D_3__Coriobacteriales;D_4__Eggerthellaceae;D_5__Enterorhabdus	0	0	0	0	0	0	0	0	0	0	0	0	0	0	0	0	0	0	0	0	0	0	0	0	0	0	0	0	0	0	0	0	0	0	0	0	0	0	0	0	0	0	0	0	0	0	0	0	0
D_0__Bacteria;D_1__Actinobacteria;D_2__Coriobacteriia;D_3__Coriobacteriales;D_4__Eggerthellaceae;D_5__Gordonibacter	0	0	0	0	0	0	0	0	0	0	0	0	0	0	0	0	0	0	0	0	0	0	0	0	0	0	0	0	0	0	0	0	0	0	0	0	0	0	0	0	0	0	0	0	0	0	0	0	0
D_0__Bacteria;D_1__Actinobacteria;D_2__Coriobacteriia;D_3__Coriobacteriales;D_4__Eggerthellaceae;D_5__Paraeggerthella	0	0	0	0	0	0	0	0	0	0	0	0	0	0	0	0	0	0	0	0	0	0	0	0	0	0	0	0	0	0	0	0	0	0	0	0	0	0	0	0	0	0	0	0	0	0	0	0	0
D_0__Bacteria;D_1__Actinobacteria;D_2__Coriobacteriia;D_3__Coriobacteriales;D_4__Eggerthellaceae;D_5__Senegalimassilia	0	0	0	0	0	0	0	0	0	0	0	0	0	0	0	0	0	0	0	0	0	0	0	0	0	0	0	0	0	0	0	0	0	0	0	0	0	0	0	0	0	0	0	0	0	0	0	0	0
D_0__Bacteria;D_1__Actinobacteria;D_2__Coriobacteriia;D_3__Coriobacteriales;D_4__Eggerthellaceae;D_5__Slackia	0	0	0	0	0	0	0	0	0	0	0	0	0	0	0	0	0	0	0	0	0	0	0	0	0	0	0	0	0	0	0	0	0	0	0	0	0	0	0	0	0	0	0	0	0	0	0	0	0
D_0__Bacteria;D_1__Actinobacteria;D_2__Coriobacteriia;D_3__Coriobacteriales;D_4__Eggerthellaceae;D_5__uncultured	0	0	0	0	0	0	0	0	0	0	0	0	0	0	0	0	0	0	0	0	0	0	0	0	0	0	0	0	0	0	0	0	0	0	0	0	0	0	0	0	0	0	0	0	0	0	0	0	0
D_0__Bacteria;D_1__Actinobacteria;D_2__Coriobacteriia;D_3__Coriobacteriales;D_4__Eggerthellaceae;__	0	0	0	0	0	0	0	0	0	0	0	0	0	0	0	0	0	0	0	0	0	0	0	0	0	0	0	0	0	0	0	0	0	0	0	0	0	0	0	0	0	0	0	0	0	0	0	0	0
D_0__Bacteria;D_1__Actinobacteria;D_2__Coriobacteriia;D_3__Coriobacteriales;D_4__uncultured;D_5__uncultured bacterium	0	0	0	0	0	0	0	0	0	0	0	0	0	0	0	0	0	0	0	0	0	0	0	0	0	0	0	0	0	0	0	0	0	0	0	0	0	0	0	0	0	0	0	0	0	0	0	0	0
D_0__Bacteria;D_1__Actinobacteria;D_2__Thermoleophilia;D_3__Gaiellales;D_4__Gaiellaceae;D_5__Gaiella	0	0	0	0	0	0	0	0	0	0	0	0	0	0	0	0	0	0	0	0	0	0	0	0	0	0	0	0	0	0	0	0	0	0	0	0	0	0	0	0	0	0	0	0	0	0	0	0	0
D_0__Bacteria;D_1__Actinobacteria;D_2__Thermoleophilia;D_3__Gaiellales;D_4__uncultured;D_5__uncultured bacterium	0	0	0	0	0	0	0	0	0	0	0	0	0	0	0	0	0	0	0	0	0	0	0	0	0	0	0	0	0	0	0	0	0	0	0	0	0	0	0	0	0	0	0	0	0	0	0	0	0
D_0__Bacteria;D_1__Actinobacteria;D_2__Thermoleophilia;D_3__Solirubrobacterales;D_4__67-14;__	0	0	0	0	0	0	0	0	0	0	0	0	0	0	0	0	0	0	0	0	0	0	0	0	0	0	0	0	0	0	0	0	0	0	0	0	0	0	0	0	0	0	0	0	0	0	0	0	0
D_0__Bacteria;D_1__Actinobacteria;D_2__Thermoleophilia;D_3__Solirubrobacterales;__;__	0	0	0	0	0	0	0	0	0	0	0	0	0	0	0	0	0	0	0	0	0	0	0	0	0	0	0	0	0	0	0	0	0	0	0	0	0	0	0	0	0	0	0	0	0	0	0	0	0
D_0__Bacteria;D_1__Armatimonadetes;D_2__Armatimonadia;D_3__Armatimonadales;D_4__uncultured bacterium;D_5__uncultured bacterium	0	0	0	0	0	0	0	0	0	0	0	0	0	0	0	0	0	0	0	0	0	0	0	0	0	0	0	0	0	0	0	0	0	0	0	0	0	0	0	0	0	0	0	0	0	0	0	0	0
D_0__Bacteria;D_1__Bacteroidetes;D_2__Bacteroidia;D_3__Bacteroidales;D_4__Bacteroidaceae;D_5__Bacteroides	0.167875	0	0.066457	0	0	0	0.0137632	0	0	0	0	0	0	0.0188816	0	0	0	0	0	0	0	0	0	0	0.00691252	0	0	0.332068	0	0	0	0	0.00633252	0	0	0	0	0	0.0582157	0	0	0	0	0	0	0	0	0.00698714	0
D_0__Bacteria;D_1__Bacteroidetes;D_2__Bacteroidia;D_3__Bacteroidales;D_4__Bacteroidales Incertae Sedis;D_5__Phocaeicola	0.0705077	0	0	0	0	0	0	0	0	0	0.0253936	0	0.0220836	0	0	0	0	0	0	0	0	0	0	0.219212	0	0	0	0.318515	0	0	0	0	0	0	0	0	0	0	0.11158	0	0	0	0	0	0	0	0	0	0.109123
D_0__Bacteria;D_1__Bacteroidetes;D_2__Bacteroidia;D_3__Bacteroidales;D_4__Barnesiellaceae;D_5__Barnesiella	0	0	0	0	0	0	0	0	0	0	0	0	0	0	0	0	0	0	0	0	0	0	0	0	0	0	0	0	0	0	0	0	0	0	0	0	0	0	0	0	0	0	0	0	0	0	0	0	0
D_0__Bacteria;D_1__Bacteroidetes;D_2__Bacteroidia;D_3__Bacteroidales;D_4__Barnesiellaceae;D_5__Coprobacter	0	0	0	0	0	0	0	0	0	0	0	0	0	0	0	0	0	0	0	0	0	0	0	0	0	0	0	0	0	0	0	0	0	0	0	0	0	0	0	0	0	0	0	0	0	0	0	0	0
D_0__Bacteria;D_1__Bacteroidetes;D_2__Bacteroidia;D_3__Bacteroidales;D_4__Barnesiellaceae;D_5__uncultured	0	0	0	0	0	0	0	0	0	0	0	0	0	0	0	0	0	0	0	0	0	0	0	0	0	0	0	0	0	0	0	0	0	0	0	0	0	0	0	0	0	0	0	0	0	0	0	0	0
D_0__Bacteria;D_1__Bacteroidetes;D_2__Bacteroidia;D_3__Bacteroidales;D_4__Marinifilaceae;D_5__Butyricimonas	0	0	0	0	0	0	0	0	0	0	0	0	0	0	0	0	0	0	0	0	0	0	0	0	0	0	0	0	0	0	0	0	0	0	0	0	0	0	0	0	0	0	0	0	0	0	0	0	0
D_0__Bacteria;D_1__Bacteroidetes;D_2__Bacteroidia;D_3__Bacteroidales;D_4__Marinifilaceae;D_5__Odoribacter	0	0	0	0	0	0	0	0	0	0	0	0	0	0	0	0	0	0	0	0	0	0	0	0	0	0	0	0	0	0	0	0	0	0	0	0	0	0	0	0	0	0	0	0	0	0	0	0	0
D_0__Bacteria;D_1__Bacteroidetes;D_2__Bacteroidia;D_3__Bacteroidales;D_4__Marinifilaceae;D_5__Sanguibacteroides	0	0	0	0	0	0	0	0	0	0	0	0	0	0	0	0	0	0	0	0	0	0	0	0	0	0	0	0	0	0	0	0	0	0	0	0	0	0	0	0	0	0	0	0	0	0	0	0	0
D_0__Bacteria;D_1__Bacteroidetes;D_2__Bacteroidia;D_3__Bacteroidales;D_4__Muribaculaceae;D_5__Muribaculum	0	0	0	0	0	0	0	0	0	0	0	0	0	0	0	0	0	0	0	0	0	0	0	0	0	0	0	0	0	0	0	0	0	0	0	0	0	0	0	0	0	0	0	0	0	0	0	0	0
D_0__Bacteria;D_1__Bacteroidetes;D_2__Bacteroidia;D_3__Bacteroidales;D_4__Muribaculaceae;D_5__Porphyromonadaceae bacterium C941	0	0	0	0	0	0	0	0	0	0	0	0	0	0	0	0	0	0	0	0	0	0	0	0	0	0	0	0	0	0	0	0	0	0	0	0	0	0	0	0	0	0	0	0	0	0	0	0	0
D_0__Bacteria;D_1__Bacteroidetes;D_2__Bacteroidia;D_3__Bacteroidales;D_4__Muribaculaceae;D_5__metagenome	0	0	0	0	0	0	0	0	0	0	0	0	0	0	0	0	0	0	0	0	0	0	0	0	0	0	0	0	0	0	0	0	0	0	0	0	0	0	0	0	0	0	0	0	0	0	0	0	0
D_0__Bacteria;D_1__Bacteroidetes;D_2__Bacteroidia;D_3__Bacteroidales;D_4__Muribaculaceae;D_5__mouse gut metagenome	0	0	0	0	0	0	0	0	0	0	0	0	0	0	0	0	0	0.0292757	0	0	0	0	0	0	0	0	0	0	0	0	0	0	0	0	0	0	0	0	0	0	0	0	0	0	0	0	0	0	0
D_0__Bacteria;D_1__Bacteroidetes;D_2__Bacteroidia;D_3__Bacteroidales;D_4__Muribaculaceae;D_5__uncultured Bacteroidales bacterium	0	0	0	0	0	0	0	0	0	0	0	0	0	0	0	0	0	0	0	0	0	0	0	0	0	0	0	0	0	0	0	0	0	0	0	0	0	0	0.0485131	0	0	0	0	0	0	0	0	0	0
D_0__Bacteria;D_1__Bacteroidetes;D_2__Bacteroidia;D_3__Bacteroidales;D_4__Muribaculaceae;D_5__uncultured Barnesiella sp.	0	0	0	0	0	0	0	0	0	0	0	0	0	0	0	0	0	0	0	0	0	0	0	0	0	0	0	0	0	0	0	0	0	0	0	0	0	0	0	0	0	0	0	0	0	0	0	0	0
D_0__Bacteria;D_1__Bacteroidetes;D_2__Bacteroidia;D_3__Bacteroidales;D_4__Muribaculaceae;D_5__uncultured bacterium	0	0	0	0	0	0	0	0	0	0	0	0	0	0	0	0.0285274	0	0.0175654	0	0	0	0	0	0	0	0	0	0	0	0	0	0	0	0	0	0	0	0	0	0	0	0	0	0	0	0	0	0	0
D_0__Bacteria;D_1__Bacteroidetes;D_2__Bacteroidia;D_3__Bacteroidales;D_4__Muribaculaceae;D_5__uncultured rumen bacterium	0	0	0	0	0	0	0	0	0	0	0	0	0	0	0	0	0	0	0	0	0	0	0	0	0	0	0	0	0	0	0	0	0	0	0	0	0	0	0	0	0	0	0	0	0	0	0	0	0
D_0__Bacteria;D_1__Bacteroidetes;D_2__Bacteroidia;D_3__Bacteroidales;D_4__Muribaculaceae;__	0	0	0	0	0	0	0	0	0	0	0	0	0	0	0	0	0	0	0	0	0.0183408	0	0	0	0	0	0	0	0	0	0	0	0	0	0	0	0	0	0	0	0	0	0	0	0	0	0	0	0
D_0__Bacteria;D_1__Bacteroidetes;D_2__Bacteroidia;D_3__Bacteroidales;D_4__Paludibacteraceae;D_5__F0058	0	0.0936239	0	0.0738949	0.207441	0.024	0.0894608	0.0501505	0.108011	0	0.0698324	0	0.055209	0.047204	0.183161	0.228219	0.234542	0	0	0.0316599	0.128385	0.292797	0.139185	0.0281041	0.0449314	0.101468	0.0883288	0.0542152	0.136809	0.307166	0	0	0.012665	0.0680982	0.499383	0	0.101563	0	0	0.0780214	0.0374641	0.127419	0.0909918	0.330011	0.0493005	0	0.181915	0	0.187067
D_0__Bacteria;D_1__Bacteroidetes;D_2__Bacteroidia;D_3__Bacteroidales;D_4__Porphyromonadaceae;D_5__Porphyromonas	1.86006	2.45682	3.68615	2.82816	6.02918	0.304	3.8709	5.8676	4.14041	0.954016	2.12671	8.11484	5.6534	0.245461	4.92817	2.32784	0.98081	2.60554	2.82733	4.69019	2.98955	4.87345	0.825833	6.5876	2.65441	0.417811	4.62843	5.62483	4.60591	3.33609	4.79742	2.9595	2.26704	2.44246	2.81134	6.91505	1.04948	2.59601	1.55727	0.967465	0.512009	0.788787	0.974912	5.66743	1.3003	1.04334	3.52595	3.89533	2.06086
D_0__Bacteria;D_1__Bacteroidetes;D_2__Bacteroidia;D_3__Bacteroidales;D_4__Prevotellaceae;D_5__Alloprevotella	3.40115	3.83858	10.1989	1.80707	3.26552	0.536	3.61628	8.02407	5.08851	3.54258	5.51676	3.79799	6.93977	0.641974	2.47839	2.65876	3.60341	5.64436	3.56221	2.81321	1.38167	3.1492	1.20163	7.31269	3.40442	1.80852	7.54328	4.94714	12.157	2.49472	4.60432	4.59502	4.78739	4.96209	3.90259	11.8954	4.75089	3.95745	1.05273	3.90107	1.15306	1.11037	3.55518	3.34052	4.14125	5.87881	1.98502	3.07085	4.01883
D_0__Bacteria;D_1__Bacteroidetes;D_2__Bacteroidia;D_3__Bacteroidales;D_4__Prevotellaceae;D_5__Paraprevotella	0	0	0	0	0	0	0	0	0	0	0	0	0	0	0	0	0	0	0	0	0	0	0	0	0	0	0	0	0	0	0	0	0	0	0	0	0	0	0	0	0	0	0	0	0	0	0	0	0
D_0__Bacteria;D_1__Bacteroidetes;D_2__Bacteroidia;D_3__Bacteroidales;D_4__Prevotellaceae;D_5__Prevotella	7.61483	2.3406	5.3963	2.45869	2.93094	2.344	4.59691	3.89293	10.255	6.71628	2.47588	3.01626	4.0413	2.90462	4.40158	3.89684	2.44492	3.23789	4.00539	6.59882	1.99914	5.8169	1.71662	6.98668	3.94705	1.32506	3.84525	3.23936	3.99027	2.50274	3.72541	6.7757	5.54412	2.95546	8.5635	4.32285	2.47983	2.7424	2.23645	3.76063	2.51842	1.15891	4.75757	1.32678	2.76083	2.70198	2.3114	3.89533	2.18557
D_0__Bacteria;D_1__Bacteroidetes;D_2__Bacteroidia;D_3__Bacteroidales;D_4__Prevotellaceae;D_5__Prevotella 1	0.352538	0	0.137344	0	0	0	0	0	0.342034	0	0	0	0	0	0	0	0	0	0	0	0	0	0	0.646394	0	0	0	0.426945	0	0	0	0	0	0	0	0	0	0	0	0	0	0	0	0	0	0	0	0	0
D_0__Bacteria;D_1__Bacteroidetes;D_2__Bacteroidia;D_3__Bacteroidales;D_4__Prevotellaceae;D_5__Prevotella 2	0.10744	0.190476	1.71016	0.181378	1.10412	0.056	0.739772	1.80542	0.360036	0.0190803	0.15871	0.0968523	1.55137	0.352456	0.870013	0.336623	0.248756	1.14175	0.0504881	0.0995025	0.213976	0.618127	0.454672	0.123658	0.0622127	0	0.647745	0.623475	1.07927	0.65974	0.0799015	1.6415	0.0601589	0.0817179	0.493218	0.869105	0.0959206	0.468453	0.0970261	0.788016	0	0.182028	0.33797	0.602775	0.147902	0.193954	0.508293	0.359838	0.374135
D_0__Bacteria;D_1__Bacteroidetes;D_2__Bacteroidia;D_3__Bacteroidales;D_4__Prevotellaceae;D_5__Prevotella 6	3.51195	0.703793	1.02344	0.349322	0.301124	1.688	0.839555	0.482698	0.39604	2.87477	1.21254	0.546524	0	1.20842	0.39494	1.37502	1.258	2.09614	1.36879	2.83582	0.794767	0.36437	2.88114	1.09606	2.19127	2.07115	0.924508	0.237192	0.372425	1.68541	1.59803	1.13827	2.53617	1.03055	1.73243	0.400544	0.995881	2.83511	0.834425	1.73207	1.59847	0	2.88249	0.228987	1.31879	1.27742	0.299625	0.663779	1.10058
D_0__Bacteria;D_1__Bacteroidetes;D_2__Bacteroidia;D_3__Bacteroidales;D_4__Prevotellaceae;D_5__Prevotella 7	13.6718	12.4423	12.0243	5.35402	6.12286	5.4	7.65234	8.73872	9.10291	20.9947	7.59269	8.28779	9.66157	9.56981	9.84489	9.04319	10.6752	11.7805	7.56199	8.87381	4.14501	9.04418	21.8567	16.6432	10.7835	7.78918	10.7467	11.1548	9.82367	5.78007	11.3926	9.00431	12.1331	6.49203	14.3835	7.21735	13.2794	9.50568	5.938	10.1194	14.5069	3.79831	8.67022	2.23936	6.71104	19.0744	6.27608	17.3805	8.43674
D_0__Bacteria;D_1__Bacteroidetes;D_2__Bacteroidia;D_3__Bacteroidales;D_4__Prevotellaceae;D_5__Prevotella 9	0	0	0	0	0	0	0	0	0	0	0	0	0	0	0	0	0	0	0	0	0	0	0	0	0	0	0	0	0	0	0	0	0	0	0	0	0	0	0	0	0	0	0	0	0	0	0	0	0
D_0__Bacteria;D_1__Bacteroidetes;D_2__Bacteroidia;D_3__Bacteroidales;D_4__Prevotellaceae;D_5__Prevotellaceae NK3B31 group	0	0	0	0	0	0	0	0	0	0	0	0	0	0	0	0	0	0	0	0	0	0	0	0	0	0	0	0	0	0	0	0	0	0	0	0	0	0	0	0	0	0	0	0	0	0	0	0	0
D_0__Bacteria;D_1__Bacteroidetes;D_2__Bacteroidia;D_3__Bacteroidales;D_4__Prevotellaceae;D_5__Prevotellaceae UCG-001	0	0	0	0	0	0	0	0	0	0	0	0	0	0	0	0	0	0	0	0	0	0	0	0	0	0	0	0	0	0	0	0	0	0	0	0	0	0	0	0	0	0	0	0	0	0	0	0	0
D_0__Bacteria;D_1__Bacteroidetes;D_2__Bacteroidia;D_3__Bacteroidales;D_4__Prevotellaceae;D_5__Prevotellaceae UCG-003	0	0	0	0	0	0	0	0	0	0	0	0	0	0	0	0	0	0	0	0	0	0	0	0	0	0	0	0	0	0	0	0	0	0	0	0	0	0	0	0	0	0	0	0	0	0	0	0	0
D_0__Bacteria;D_1__Bacteroidetes;D_2__Bacteroidia;D_3__Bacteroidales;D_4__Prevotellaceae;D_5__Prevotellaceae UCG-004	0.0872952	0	0	0	0	0	0	0	0	0	0	0	0	0	0	0	0	0	0	0	0	0	0	0	0	0	0	0.0609921	0	0	0	0	0	0	0	0	0	0	0	0	0	0	0	0	0	0	0	0	0
D_0__Bacteria;D_1__Bacteroidetes;D_2__Bacteroidia;D_3__Bacteroidales;D_4__Prevotellaceae;D_5__uncultured	0.10744	0	0	0	0	0	0	0	0	0.0318005	0	0	0	0	0	0	0	0	0	0.0497512	0	0.0715726	0.0881507	0	0	0	0	0	0	0	0	0	0	0	0.0739827	0	0	0	0	0	0	0	0	0	0	0	0	0	0.0218245
D_0__Bacteria;D_1__Bacteroidetes;D_2__Bacteroidia;D_3__Bacteroidales;D_4__Prevotellaceae;__	0.0100725	0	0	0	0	0	0	0	0	0	0	0	0	0.00629386	0	0	0	0	0	0.0135685	0	0	0	0	0	0	0	0.467606	0	0	0	0	0	0	0	0	0	0	0.0145539	0	0	0	0	0	0	0	0	0	0
D_0__Bacteria;D_1__Bacteroidetes;D_2__Bacteroidia;D_3__Bacteroidales;D_4__Rikenellaceae;D_5__Alistipes	0	0	0	0	0	0	0	0	0	0	0	0	0	0	0	0	0	0	0	0	0	0	0	0	0	0	0	0	0	0	0	0	0	0	0	0	0	0	0	0	0	0	0	0	0	0	0	0	0
D_0__Bacteria;D_1__Bacteroidetes;D_2__Bacteroidia;D_3__Bacteroidales;D_4__Rikenellaceae;D_5__Rikenellaceae RC9 gut group	0.302176	0.135593	0	0	0	0	0.0240856	0	0.0540054	0.0254404	0	0	0.0276045	0	0.0400664	0	0	0	0	0	0.268998	0.0390396	0.0788717	0.258558	0	0.0358123	0.0117772	0.216861	0	0.125538	0	0.143781	0	0	0.0246609	0	0	0	0.063067	0	0	0	0	0	0	0	0.0963082	0	0.0561202
D_0__Bacteria;D_1__Bacteroidetes;D_2__Bacteroidia;D_3__Bacteroidales;D_4__Tannerellaceae;D_5__Parabacteroides	0	0	0	0	0	0	0	0	0	0	0	0	0	0	0	0	0	0	0	0	0	0	0	0	0	0	0	0	0	0	0	0	0	0	0	0	0	0	0	0	0	0	0	0	0	0	0	0	0
D_0__Bacteria;D_1__Bacteroidetes;D_2__Bacteroidia;D_3__Bacteroidales;D_4__Tannerellaceae;D_5__Tannerella	0.560704	0.377724	0.292411	0	0.588865	0	0.21677	0.0877633	0.192019	0.248044	0.0507872	0.110688	0	0.0692325	0.309084	0.136932	0.270078	0.0702617	0.213172	0.0814111	0.0855903	0.605114	0.3758	0.393457	0.0587564	0.0596872	0.0824402	0.860667	0.163411	0.670424	0.0799015	0.0119818	0	0.140736	0.160296	0.241838	0.0310331	0.248865	0.189201	0.0702192	0.0790909	0.339785	0.103991	0.447872	0.0739508	0	0.203317	0	0.433373
D_0__Bacteria;D_1__Bacteroidetes;D_2__Bacteroidia;D_3__Bacteroidales;D_4__p-2534-18B5 gut group;D_5__uncultured bacterium	0	0	0	0	0	0	0	0	0	0	0	0	0	0	0	0	0	0	0	0	0	0	0	0	0	0	0	0.311738	0	0	0	0	0	0	0	0	0	0	0	0	0	0	0	0	0	0	0	0	0
D_0__Bacteria;D_1__Bacteroidetes;D_2__Bacteroidia;D_3__Bacteroidales;D_4__uncultured;D_5__gut metagenome	0	0	0	0	0	0	0	0	0	0	0	0	0	0	0	0	0	0	0	0	0	0	0	0	0	0	0	0	0	0	0	0	0	0	0	0	0	0	0	0	0	0	0	0	0	0	0	0	0
D_0__Bacteria;D_1__Bacteroidetes;D_2__Bacteroidia;D_3__Bacteroidales;__;__	0	0	0	0	0	0	0	0	0	0	0	0	0	0.00629386	0	0	0	0	0	0	0	0	0	0	0	0	0	0	0	0	0	0	0	0	0	0	0	0	0	0	0	0	0	0	0	0	0	0	0
D_0__Bacteria;D_1__Bacteroidetes;D_2__Bacteroidia;D_3__Chitinophagales;D_4__Chitinophagaceae;D_5__Cnuella	0	0	0	0	0	0	0	0	0	0	0	0	0	0	0	0	0	0	0	0	0	0	0	0	0	0	0	0	0	0	0	0	0	0	0	0	0	0	0	0	0	0	0	0	0	0	0	0	0
D_0__Bacteria;D_1__Bacteroidetes;D_2__Bacteroidia;D_3__Chitinophagales;D_4__Chitinophagaceae;D_5__uncultured	0	0	0	0	0	0	0	0	0	0	0	0	0	0	0	0	0	0	0	0	0	0	0	0	0	0	0	0	0	0	0	0	0	0	0	0	0	0	0	0	0	0	0	0	0	0	0	0	0
D_0__Bacteria;D_1__Bacteroidetes;D_2__Bacteroidia;D_3__Cytophagales;D_4__Hymenobacteraceae;D_5__Hymenobacter	0	0	0	0	0	0	0	0	0	0	0	0	0	0	0	0	0	0	0	0	0	0	0	0	0	0	0	0	0	0	0	0	0	0	0	0	0	0	0	0	0	0	0	0	0	0	0	0	0
D_0__Bacteria;D_1__Bacteroidetes;D_2__Bacteroidia;D_3__Cytophagales;__;__	0	0	0	0	0	0	0	0	0	0	0	0	0	0	0	0	0	0	0	0	0	0	0	0	0	0	0	0	0	0	0	0	0	0	0	0	0	0	0	0	0	0	0	0	0	0	0	0	0
D_0__Bacteria;D_1__Bacteroidetes;D_2__Bacteroidia;D_3__Flavobacteriales;D_4__Flavobacteriaceae;D_5__Capnocytophaga	0.130943	4.00969	1.8032	1.35026	3.98822	0.912	2.35351	0.78987	0.426043	1.0049	2.01879	1.17606	1.66731	1.46647	2.23227	1.92275	0.2914	1.07149	1.21732	0.759837	1.06988	1.32084	0.3758	0.230454	0.53572	0.835621	1.35438	0.691244	2.81979	1.60261	1.7312	0.389408	0.436944	4.38099	1.17139	1.32255	0.338543	0.356219	0.339592	1.02208	0.195646	1.49263	1.86533	4.10156	1.09077	0.494917	1.68004	0.394774	3.62287
D_0__Bacteria;D_1__Bacteroidetes;D_2__Bacteroidia;D_3__Flavobacteriales;D_4__Flavobacteriaceae;D_5__uncultured	0	0	0	0	0	0	0	0	0	0	0	0	0	0	0	0	0	0	0	0	0	0	0	0	0	0	0	0	0	0	0	0	0	0	0	0	0	0	0	0	0	0	0	0	0	0	0	0	0
D_0__Bacteria;D_1__Bacteroidetes;D_2__Bacteroidia;D_3__Flavobacteriales;D_4__Weeksellaceae;D_5__Bergeyella	0	0.603713	0.19051	0.342604	2.42907	0.08	0.165158	0.244483	0.0840084	0.178083	0.520569	0.242131	0.607299	0.0409101	0.274741	0.285274	0.362473	0.415715	0.286099	0.199005	0.201748	0.123625	0.0278371	0.47777	0.0518439	0.0775934	0.588859	0.311738	0.307821	0.149577	0.253021	0	0.265966	0.118037	0.0739827	0.0982467	0.33008	0.224467	0.252268	0.234064	0.0249761	0.946545	0.354218	1.75781	0.043138	0.0735688	0.733012	0.317915	0.274366
D_0__Bacteria;D_1__Bacteroidetes;D_2__Bacteroidia;D_3__Flavobacteriales;D_4__Weeksellaceae;D_5__Chryseobacterium	0	0	0	0	0	0	0	0	0	0	0	0	0	0	0	0	0	0	0	0.0678426	0	0	0	0	0	0	0	0	0	0	0	0	0	0	0	0	0	0	0	0	0	0	0	0	0	0	0	0	0
D_0__Bacteria;D_1__Bacteroidetes;D_2__Bacteroidia;D_3__Flavobacteriales;D_4__Weeksellaceae;D_5__Cloacibacterium	0	0	0	0	0	0	0	0	0	0	0	0	0	0	0	0	0	0	0	0	0	0	0	0	0	0	0	0	0	0	0	0	0	0	0	0	0	0	0	0	0	0	0	0	0	0	0	0	0
D_0__Bacteria;D_1__Bacteroidetes;D_2__Bacteroidia;D_3__Flavobacteriales;D_4__Weeksellaceae;D_5__Empedobacter	0	0	0	0	0	0	0	0	0	0	0	0	0	0	0	0	0	0	0	0	0	0	0	0	0	0	0	0	0	0	0	0	0	0	0	0	0	0	0	0	0	0	0	0	0	0	0	0	0
D_0__Bacteria;D_1__Bacteroidetes;D_2__Bacteroidia;D_3__Flavobacteriales;D_4__Weeksellaceae;__	0	0	0	0	0	0	0	0	0	0	0	0	0	0	0	0	0	0	0	0	0	0	0	0	0	0	0	0	0	0	0	0	0	0	0	0	0	0	0	0	0	0	0	0	0	0	0	0	0
D_0__Bacteria;D_1__Bacteroidetes;D_2__Bacteroidia;D_3__Sphingobacteriales;D_4__Lentimicrobiaceae;D_5__Bacteroidales genomosp. P4 oral clone MB2_G17	0	0	0	0	0	0	0	0	0	0	0	0	0	0	0	0	0	0	0	0	0	0	0	0	0	0	0	0.28463	0	0	0	0	0	0	0	0	0	0	0	0	0	0	0	0	0	0	0	0	0
D_0__Bacteria;D_1__Bacteroidetes;D_2__Bacteroidia;D_3__Sphingobacteriales;D_4__Lentimicrobiaceae;D_5__uncultured eubacterium E1-K9	0.0235026	0.22276	0	0	0	0	0	0.119107	0	0.0190803	0	0	0	0	0.074409	0	0.127932	0	0	0.00904568	0.0183408	0.0520528	0.0324766	0	0.013825	0	0	0	0	0.149577	0	0	0	0	0	0	0	0	0	0	0	0	0.0357468	0	0.0308128	0	0	0.0139743	0.0342957
D_0__Bacteria;D_1__Bacteroidetes;D_2__Bacteroidia;D_3__Sphingobacteriales;D_4__Lentimicrobiaceae;D_5__unidentified	0	0.103309	0	0	0	0	0	0	0	0	0	0	0	0	0	0	0	0	0	0	0	0	0.0742322	0.106796	0	0	0	0.135538	0	0	0	0	0	0	0	0	0	0	0	0	0	0	0	0	0	0	0.0535045	0	0
D_0__Bacteria;D_1__Bacteroidetes;D_2__Bacteroidia;D_3__Sphingobacteriales;D_4__Sphingobacteriaceae;D_5__Pedobacter	0	0	0	0	0	0	0	0	0	0	0	0	0	0	0	0	0	0	0	0.0361827	0	0	0	0	0	0	0	0	0	0	0	0	0	0	0	0	0	0	0	0	0	0	0	0	0	0	0	0	0
D_0__Bacteria;D_1__Bacteroidetes;D_2__Bacteroidia;__;__;__	0	0	0	0	0	0	0	0	0	0	0	0.0484262	0	0	0	0	0	0	0	0	0	0	0.0881507	0	0	0	0	0	0	0	0	0	0	0	0	0	0	0	0	0	0	0	0	0.00673491	0	0	0	0	0
D_0__Bacteria;D_1__Bacteroidetes;D_2__Ignavibacteria;D_3__Ignavibacteriales;D_4__PHOS-HE36;D_5__uncultured bacterium	0	0	0	0	0	0	0	0	0	0	0	0	0	0	0	0	0	0	0	0	0	0	0	0	0	0	0	0	0	0	0	0	0	0	0	0	0	0	0	0	0	0	0	0	0	0	0	0	0
D_0__Bacteria;D_1__Chloroflexi;D_2__Anaerolineae;D_3__Caldilineales;D_4__Caldilineaceae;D_5__uncultured	0	0	0	0	0	0	0	0	0	0	0	0	0	0	0	0	0	0	0	0	0	0	0	0	0	0	0	0	0	0	0	0	0	0	0	0	0	0	0	0	0	0	0	0	0	0	0	0	0
D_0__Bacteria;D_1__Chloroflexi;D_2__Chloroflexia;D_3__Chloroflexales;D_4__Roseiflexaceae;D_5__uncultured	0	0	0	0	0	0	0	0	0	0	0	0	0	0	0	0	0	0	0	0	0	0	0	0	0	0	0	0	0	0	0	0	0	0	0	0	0	0	0	0	0	0	0	0	0	0	0	0	0
D_0__Bacteria;D_1__Chloroflexi;D_2__Dehalococcoidia;D_3__S085;D_4__metagenome;D_5__metagenome	0	0	0	0	0	0	0	0	0	0	0	0	0	0	0	0	0	0	0	0	0	0	0	0	0	0	0	0	0	0	0	0	0	0	0	0	0	0	0	0	0	0	0	0	0	0	0	0	0
D_0__Bacteria;D_1__Cyanobacteria;D_2__Melainabacteria;D_3__Gastranaerophilales;D_4__Acinetobacter sp. CAG:196;D_5__Acinetobacter sp. CAG:196	0	0	0	0	0	0	0	0	0	0	0	0	0	0	0	0	0	0	0	0	0	0	0	0	0	0	0	0	0	0	0	0	0	0	0	0	0	0	0	0	0	0	0	0	0	0	0	0	0
D_0__Bacteria;D_1__Cyanobacteria;D_2__Melainabacteria;D_3__Gastranaerophilales;__;__	0	0	0	0	0	0	0	0	0	0	0	0	0	0	0	0	0	0	0	0	0	0	0	0	0	0	0	0	0	0	0	0	0	0	0	0	0	0	0	0	0	0	0	0	0	0	0	0	0
D_0__Bacteria;D_1__Cyanobacteria;D_2__Oxyphotobacteria;D_3__Chloroplast;__;__	0	0	0	0	0	0	0	0	0	0	0.031742	0	0	0	0	0	0	0	0	0	0	0	0.153104	0	0.013825	0	0	0	0	0.0988274	0	0	0	0	0	0	0.059245	0.0195189	0	0	0	0	0	0	0	0	0	0	0
D_0__Bacteria;D_1__Cyanobacteria;D_2__Oxyphotobacteria;D_3__Nostocales;D_4__Chroococcidiopsaceae;D_5__uncultured	0	0	0	0	0	0	0	0	0	0	0	0	0	0	0	0	0	0	0	0	0	0	0	0	0	0	0	0	0	0	0	0	0	0	0	0	0	0	0	0	0	0	0	0	0	0	0	0	0
D_0__Bacteria;D_1__Cyanobacteria;D_2__Oxyphotobacteria;D_3__Nostocales;D_4__Nostocaceae;D_5__Calothrix PCC-6303	0	0	0	0	0	0	0	0	0	0	0	0	0	0	0	0	0	0	0	0	0	0	0	0	0	0	0	0	0	0	0	0	0	0	0	0	0	0	0	0	0	0	0	0	0	0	0	0	0
D_0__Bacteria;D_1__Cyanobacteria;D_2__Oxyphotobacteria;D_3__Nostocales;D_4__Nostocaceae;D_5__Scytonema UTEX 2349	0	0	0	0	0	0	0	0	0	0	0	0	0	0	0	0	0	0	0	0	0	0	0	0	0	0	0	0	0	0	0	0	0	0	0	0	0	0	0	0	0	0	0	0	0	0	0	0	0
D_0__Bacteria;D_1__Cyanobacteria;D_2__Oxyphotobacteria;D_3__Nostocales;D_4__uncultured;D_5__uncultured bacterium	0	0	0	0	0	0	0	0	0	0	0	0	0	0	0	0	0	0	0	0	0	0	0	0	0	0	0	0	0	0	0	0	0	0	0	0	0	0	0	0	0	0	0	0	0	0	0	0	0
D_0__Bacteria;D_1__Cyanobacteria;D_2__Oxyphotobacteria;D_3__Nostocales;__;__	0	0	0	0	0	0	0	0	0	0	0	0	0	0	0	0	0	0	0	0	0	0	0	0	0	0	0	0	0	0	0	0	0	0	0	0	0	0	0	0	0	0	0	0	0	0	0	0	0
D_0__Bacteria;D_1__Deferribacteres;D_2__Deferribacteres;D_3__Deferribacterales;D_4__Deferribacteraceae;D_5__Mucispirillum	0	0	0	0	0	0	0	0	0	0	0	0	0	0	0	0	0	0	0	0	0	0	0	0	0	0	0	0	0	0	0	0	0	0	0	0	0	0	0	0	0	0	0	0	0	0	0	0	0
D_0__Bacteria;D_1__Deinococcus-Thermus;D_2__Deinococci;D_3__Deinococcales;D_4__Deinococcaceae;D_5__Deinococcus	0	0	0	0	0	0	0	0	0	0	0	0	0	0	0	0	0	0	0	0	0	0	0	0	0	0	0	0	0	0	0	0	0	0	0	0	0	0	0	0	0	0	0	0	0	0	0	0	0
D_0__Bacteria;D_1__Deinococcus-Thermus;D_2__Deinococci;D_3__Deinococcales;D_4__Trueperaceae;D_5__Truepera	0	0	0	0	0	0	0	0	0	0	0	0	0	0	0	0	0	0	0	0	0	0	0	0	0	0	0	0	0	0	0	0	0	0	0	0	0	0	0	0	0	0	0	0	0	0	0	0	0
D_0__Bacteria;D_1__Epsilonbacteraeota;D_2__Campylobacteria;D_3__Campylobacterales;D_4__Campylobacteraceae;D_5__Campylobacter	2.08165	1.31396	1.04559	1.51149	0.682548	1.84	4.12552	0.564193	1.82418	1.1639	5.17395	1.57039	0.98272	1.37836	3.07939	2.31643	0.668088	4.39721	2.59172	3.67255	1.14936	2.42696	1.22483	1.32651	3.92977	3.31264	1.85491	0.935213	1.79752	2.07538	1.1852	5.3259	1.86176	4.86675	2.77435	2.74335	4.3531	5.07002	2.70703	3.61239	1.44029	0.570354	3.2887	0.825027	1.26949	2.17362	1.74425	1.28214	3.72576
D_0__Bacteria;D_1__Epsilonbacteraeota;D_2__Campylobacteria;D_3__Campylobacterales;D_4__Helicobacteraceae;D_5__Wolinella	0.0436476	0	0	0	0	0	0	0	0	0	0	0	0	0	0	0	0	0	0	0	0	0	0	0	0	0	0	0.0203307	0	0	0	0	0	0	0	0	0	0	0	0	0	0	0	0	0	0	0	0	0
D_0__Bacteria;D_1__FBP;D_2__uncultured bacterium;D_3__uncultured bacterium;D_4__uncultured bacterium;D_5__uncultured bacterium	0	0	0	0	0	0	0	0	0	0	0	0	0	0	0	0	0	0	0	0	0	0	0	0	0	0	0	0	0	0	0	0	0	0	0	0	0	0	0	0	0	0	0	0	0	0	0	0	0
D_0__Bacteria;D_1__Firmicutes;D_2__Bacilli;D_3__Bacillales;D_4__Bacillaceae;D_5__Anaerobacillus	0	0	0	0	0	0	0	0	0	0	0	0	0	0	0	0	0	0	0	0	0	0	0	0	0	0	0	0	0	0	0	0	0	0	0	0	0	0	0	0	0	0	0	0	0	0	0	0	0
D_0__Bacteria;D_1__Firmicutes;D_2__Bacilli;D_3__Bacillales;D_4__Bacillaceae;D_5__Bacillus	0	0	0	0	0	0	0	0	0	0	0	0	0	0	0	0	0	0	0	0	0	0	0	0	0	0	0	0	0	0	0	0	0	0	0	0	0	0	0	0	0	0	0	0	0	0	0	0	0
D_0__Bacteria;D_1__Firmicutes;D_2__Bacilli;D_3__Bacillales;D_4__Family X;D_5__Thermicanus	0	0	0	0	0	0	0	0	0	0	0	0	0	0	0	0	0	0	0	0	0	0	0	0	0	0	0	0	0	0	0	0	0	0	0	0	0	0	0	0	0	0	0	0	0	0	0	0	0
D_0__Bacteria;D_1__Firmicutes;D_2__Bacilli;D_3__Bacillales;D_4__Family XI;D_5__Gemella	0.735294	2.90557	2.47663	0.631466	6.31692	6.56	1.23181	3.44784	1.48215	1.30382	1.66328	2.54583	2.49545	1.80319	2.14069	3.38906	1.86212	1.68043	2.20464	0.610583	1.40001	1.15818	0.412916	2.2146	0.691252	0.190999	1.85491	2.62944	1.85073	0.988274	1.86437	0.976516	1.27284	1.13951	1.25154	1.95738	2.02562	0.673401	4.28856	0.421315	1.27378	0.406529	0.513454	5.71457	3.49418	1.27073	1.97432	1.17733	2.45682
D_0__Bacteria;D_1__Firmicutes;D_2__Bacilli;D_3__Bacillales;D_4__Paenibacillaceae;__	0	0	0	0	0	0	0	0	0	0	0	0	0	0	0	0	0	0	0	0	0	0	0	0	0	0	0	0	0	0	0	0	0	0	0	0	0	0	0	0	0	0	0	0	0	0	0	0	0
D_0__Bacteria;D_1__Firmicutes;D_2__Bacilli;D_3__Bacillales;D_4__Planococcaceae;D_5__Lysinibacillus	0	0	0	0	0	0	0	0	0	0	0	0	0	0	0	0	0	0	0	0	0	0	0	0	0	0	0	0	0	0	0	0	0	0	0	0	0	0	0	0	0	0	0	0	0	0	0	0	0
D_0__Bacteria;D_1__Firmicutes;D_2__Bacilli;D_3__Bacillales;D_4__Planococcaceae;D_5__Sporosarcina	0	0	0	0	0	0	0	0	0	0	0	0	0	0	0	0	0	0	0	0	0	0	0	0	0	0	0	0	0	0	0	0	0	0	0	0	0	0	0	0	0	0	0	0	0	0	0	0	0
D_0__Bacteria;D_1__Firmicutes;D_2__Bacilli;D_3__Bacillales;D_4__Planococcaceae;__	0	0	0	0	0	0.056	0	0	0	0	0	0	0	0	0	0	0	0	0	0	0	0	0	0	0	0	0	0	0	0	0	0	0	0	0	0	0	0	0	0	0	0	0	0	0	0	0	0	0
D_0__Bacteria;D_1__Firmicutes;D_2__Bacilli;D_3__Bacillales;D_4__Staphylococcaceae;D_5__Nosocomiicoccus	0	0	0	0	0	0	0	0	0	0	0	0	0	0	0	0	0	0	0	0	0	0	0	0	0	0	0	0	0	0	0	0	0	0	0	0	0	0	0	0	0	0	0	0	0	0	0	0	0
D_0__Bacteria;D_1__Firmicutes;D_2__Bacilli;D_3__Bacillales;D_4__Staphylococcaceae;D_5__Staphylococcus	0.0973677	0	0	0	0	0	0	0	0	0.0954016	0	0.0968523	0.0441672	0.0283224	0.0973041	0	0.021322	0	0	0	0	0	0.579939	0	0.34217	0.0179062	0	0.1762	0	0.0133551	0	0	0	0	0	0.0831318	0	0	0	0	0	0	0	0.080819	0	0	0	0	0
D_0__Bacteria;D_1__Firmicutes;D_2__Bacilli;D_3__Bacillales;__;__	0	0	0	0	0	0	0	0	0	0	0	0	0	0	0	0	0	0	0	0	0	0	0	0	0	0	0	0	0	0.00534202	0	0	0	0	0	0	0	0	0	0	0	0	0	0	0	0	0	0	0
D_0__Bacteria;D_1__Firmicutes;D_2__Bacilli;D_3__Lactobacillales;D_4__Aerococcaceae;D_5__Abiotrophia	0	0.387409	0.695583	0	1.11751	0.056	0.13075	0	0	1.68543	0	0.0415081	0.806051	0	0.234675	0	0.227434	0.61479	0.538539	0	0	0	0	0.168625	0	0	0.282652	0.155869	0.353424	0	1.1386	0.101845	0.72824	0.503927	0.110974	0	0.169272	0.0927146	0.320186	0	0	0.649232	0.126739	0.505119	0.363592	0	0.101659	0.0768586	0.48014
D_0__Bacteria;D_1__Firmicutes;D_2__Bacilli;D_3__Lactobacillales;D_4__Aerococcaceae;D_5__Aerococcus	0	0	0	0	0	0	0	0	0	0	0	0	0	0	0	0	0	0	0	0	0	0	0	0	0	0	0	0	0	0	0	0	0	0	0	0	0.0112848	0	0	0	0	0	0	0	0	0	0	0	0
D_0__Bacteria;D_1__Firmicutes;D_2__Bacilli;D_3__Lactobacillales;D_4__Aerococcaceae;D_5__Eremococcus	0	0	0	0	0	0	0	0	0	0	0	0	0	0	0	0	0	0	0	0	0	0	0	0	0	0	0	0	0	0	0	0	0	0	0	0	0	0	0	0	0	0	0	0	0	0	0	0	0
D_0__Bacteria;D_1__Firmicutes;D_2__Bacilli;D_3__Lactobacillales;D_4__Aerococcaceae;D_5__Facklamia	0	0	0	0	0	0	0	0	0	0	0	0	0	0	0	0	0	0	0	0	0	0	0	0	0	0	0	0	0	0	0	0	0	0	0	0	0	0	0	0	0	0	0	0	0	0	0	0	0
D_0__Bacteria;D_1__Firmicutes;D_2__Bacilli;D_3__Lactobacillales;D_4__Carnobacteriaceae;D_5__Carnobacterium	0	0	0	0	0	0	0	0	0	0	0	0	0	0	0	0	0	0	0	0	0	0	0	0	0	0	0	0	0	0	0	0	0	0	0	0	0	0	0	0	0	0	0	0	0	0	0	0	0
D_0__Bacteria;D_1__Firmicutes;D_2__Bacilli;D_3__Lactobacillales;D_4__Carnobacteriaceae;D_5__Granulicatella	0.349181	2.03067	1.02787	1.05468	1.26472	0.272	1.10794	1.35406	0.888089	2.13064	1.91087	2.26219	2.19732	1.30912	0.629615	0.99846	3.05615	1.38181	2.38416	0.63772	0.281225	0.826339	0.450032	0.966781	1.33757	0.429748	0.718408	0.637029	0.874059	0.267101	1.65463	0.611071	0.927714	0.694602	0.431566	0.816203	1.00434	0.658762	1.31956	0.444722	1.71919	2.17827	0.646692	3.44491	2.67455	1.15035	0.342429	1.33105	1.05381
D_0__Bacteria;D_1__Firmicutes;D_2__Bacilli;D_3__Lactobacillales;D_4__Enterococcaceae;D_5__Enterococcus	0	0	0	0	0	0	0	0	0	0	0	0	0	0	0	0	0	0	0	0	0	0	0	0	0	0	0	0	0	0	0	0	0	0	0	0	0	0	0	0	0	0	0	0	0	0	0	0	0
D_0__Bacteria;D_1__Firmicutes;D_2__Bacilli;D_3__Lactobacillales;D_4__Lactobacillaceae;D_5__Lactobacillus	0.349181	0	0.0177219	0	0	0.048	0	0	0.450045	0	0	0	0.055209	0.248607	0	0.0171164	0.021322	0	0	0	0	0	0.974297	0	0.0103688	0	0.0765516	0.0948767	0.0190013	0.0267101	0.0466092	0	0.0253301	0	0.0924784	0	0.014106	0	0.640373	0	0.0291387	0.0424732	0	0.00673491	0	0.0668807	0	0.04891	0.0280601
D_0__Bacteria;D_1__Firmicutes;D_2__Bacilli;D_3__Lactobacillales;D_4__Lactobacillaceae;D_5__Pediococcus	0	0	0	0	0	0	0	0	0	0	0	0	0	0	0	0	0	0	0	0	0	0	0	0	0	0	0	0	0	0	0	0	0	0	0	0	0	0	0	0	0	0	0	0	0	0	0	0	0
D_0__Bacteria;D_1__Firmicutes;D_2__Bacilli;D_3__Lactobacillales;D_4__P5D1-392;D_5__bacterium enrichment culture clone SRC_DSC20	0	0	0	0	0	0	0	0	0	0	0	0	0	0	0	0	0	0	0	0	0	0	0	0	0	0	0	0	0	0	0	0	0	0	0	0	0	0	0	0	0	0	0	0	0	0	0	0	0
D_0__Bacteria;D_1__Firmicutes;D_2__Bacilli;D_3__Lactobacillales;D_4__Streptococcaceae;D_5__Lactococcus	0	0	0	0	0	0	0	0	0	0	0	0	0	0	0	0	0	0	0	0	0	0	0	0	0	0	0	0	0	0	0	0	0	0	0	0	0	0	0	0	0	0	0	0	0	0	0	0	0
D_0__Bacteria;D_1__Firmicutes;D_2__Bacilli;D_3__Lactobacillales;D_4__Streptococcaceae;D_5__Streptococcus	11.1436	22.8184	11.4483	24.8489	19.292	26.168	11.9499	19.4584	17.1557	13.8714	24.3398	22.5804	16.4854	40.4034	14.9619	20.2259	24.4136	14.0523	22.5962	12.5871	15.5346	23.7881	25.6565	10.5334	13.3446	19.7983	13.002	15.2074	10.5267	12.8556	15.138	13.8869	12.6239	15.3085	8.94575	9.50726	16.5435	12.6189	28.9041	17.6016	30.2377	33.1412	19.742	22.9021	25.5623	13.1822	28.9674	18.1107	15.2117
D_0__Bacteria;D_1__Firmicutes;D_2__Bacilli;D_3__Lactobacillales;__;__	0.382756	2.06618	0.974702	1.0614	2.7235	1.328	0.829233	1.46063	0.912091	0.896775	1.49822	1.82636	0.888864	1.22416	1.68851	1.25521	1.6489	0.661631	0.734882	0.913614	0.947607	0.566075	0.719124	1.00613	1.04033	0.065656	1.54281	0.182976	0.668845	0.403323	1.04871	1.03642	0.747237	0.37227	0.733662	0.770859	1.3175	0.361099	1.1158	1.29515	2.06053	2.1722	0.659691	0.693696	1.43588	1.64526	0.893526	0.901342	0.654736
D_0__Bacteria;D_1__Firmicutes;D_2__Bacilli;__;__;__	0	0	0	0	0	0	0	0	0	0	0	0	0	0	0	0	0	0	0	0	0	0	0	0	0	0	0	0	0	0	0	0	0	0	0	0	0	0	0	0	0	0	0	0	0	0	0	0	0
D_0__Bacteria;D_1__Firmicutes;D_2__Clostridia;D_3__Clostridiales;D_4__Christensenellaceae;D_5__Catabacter	0	0	0	0	0	0	0	0	0	0	0	0	0	0	0	0	0	0	0	0	0	0	0	0	0	0	0	0	0	0	0	0	0	0	0	0	0	0	0	0	0	0	0	0	0	0	0	0	0
D_0__Bacteria;D_1__Firmicutes;D_2__Clostridia;D_3__Clostridiales;D_4__Christensenellaceae;D_5__Christensenella	0	0	0	0	0	0	0	0	0	0	0	0	0	0	0	0	0	0	0	0	0	0	0	0	0	0	0	0	0	0	0	0	0	0	0	0	0	0	0	0	0	0	0	0	0	0	0	0	0
D_0__Bacteria;D_1__Firmicutes;D_2__Clostridia;D_3__Clostridiales;D_4__Christensenellaceae;D_5__Christensenellaceae R-7 group	0	0	0	0	0	0	0	0	0	0	0	0	0	0	0	0	0	0	0	0	0	0	0	0	0	0	0	0	0	0	0	0	0	0	0	0	0	0	0	0	0	0	0	0	0	0	0	0	0
D_0__Bacteria;D_1__Firmicutes;D_2__Clostridia;D_3__Clostridiales;D_4__Christensenellaceae;D_5__uncultured	0	0	0	0	0	0	0	0	0	0	0	0	0	0	0	0	0	0	0	0	0	0	0	0	0	0	0	0	0	0	0	0	0	0	0	0	0	0	0	0	0	0	0	0	0	0	0	0	0
D_0__Bacteria;D_1__Firmicutes;D_2__Clostridia;D_3__Clostridiales;D_4__Christensenellaceae;__	0	0	0	0	0	0	0	0	0	0	0	0	0	0	0	0	0	0	0	0	0	0	0	0	0	0	0	0	0	0	0	0	0	0	0	0	0	0	0	0	0	0	0	0	0	0	0	0	0
D_0__Bacteria;D_1__Firmicutes;D_2__Clostridia;D_3__Clostridiales;D_4__Clostridiaceae 1;D_5__Candidatus Arthromitus	0	0	0	0	0	0	0	0	0	0	0	0	0	0	0	0	0	0	0	0	0	0	0	0	0	0	0	0	0	0	0	0	0	0	0	0	0	0	0	0	0	0	0	0	0	0	0	0	0
D_0__Bacteria;D_1__Firmicutes;D_2__Clostridia;D_3__Clostridiales;D_4__Clostridiaceae 1;D_5__Clostridium sensu stricto 1	0	0	0	0	0	0	0	0	0	0	0	0	0	0	0	0	0	0	0	0	0	0	0	0	0	0	0	0	0	0	0	0	0	0	0	0	0	0	0	0	0	0	0	0	0	0	0	0	0
D_0__Bacteria;D_1__Firmicutes;D_2__Clostridia;D_3__Clostridiales;D_4__Clostridiaceae 1;D_5__Clostridium sensu stricto 13	0	0	0	0	0	0	0	0	0	0	0	0	0	0	0	0	0	0	0	0	0	0	0	0	0	0	0	0	0	0	0	0	0	0	0	0	0	0	0	0	0	0	0	0	0	0	0	0	0
D_0__Bacteria;D_1__Firmicutes;D_2__Clostridia;D_3__Clostridiales;D_4__Clostridiaceae 1;__	0	0	0	0	0	0	0	0	0	0	0	0	0	0	0	0	0	0	0	0	0	0	0	0	0	0	0	0	0	0	0	0	0	0	0	0	0	0	0	0	0	0	0	0	0	0	0	0	0
D_0__Bacteria;D_1__Firmicutes;D_2__Clostridia;D_3__Clostridiales;D_4__Clostridiales vadinBB60 group;D_5__Clostridiales bacterium canine oral taxon 162	0	0	0	0	0	0	0	0	0	0	0	0	0	0	0	0	0	0	0	0	0	0	0	0	0	0	0	0.37273	0	0	0	0	0	0	0	0	0	0	0	0	0	0	0	0	0	0	0	0	0
D_0__Bacteria;D_1__Firmicutes;D_2__Clostridia;D_3__Clostridiales;D_4__Clostridiales vadinBB60 group;D_5__Clostridiales bacterium feline oral taxon 148	0.151088	0.0807103	0.0354437	0.0134354	0	0	0	0	0.0780078	0	0	0	0	0	0	0	0	0	0	0	0	0	0	0.326008	0	0	0.0117772	0.149092	0	0.0774593	0	0.0239636	0	0	0	0	0	0	0.0485131	0	0.012488	0	0	0	0	0	0	0	0
D_0__Bacteria;D_1__Firmicutes;D_2__Clostridia;D_3__Clostridiales;D_4__Clostridiales vadinBB60 group;D_5__uncultured Thermoanaerobacterales bacterium	0	0	0	0	0	0	0	0	0	0	0	0	0	0	0	0	0	0	0	0	0	0	0	0	0	0	0	0	0	0	0	0	0	0	0	0	0	0	0	0	0	0	0	0	0	0	0	0	0
D_0__Bacteria;D_1__Firmicutes;D_2__Clostridia;D_3__Clostridiales;D_4__Clostridiales vadinBB60 group;D_5__uncultured bacterium	0	0	0	0	0	0	0	0	0	0	0	0	0	0	0	0	0	0	0	0	0	0	0	0	0	0	0	0	0	0	0	0	0	0	0	0	0	0	0	0	0	0	0	0	0	0	0	0	0
D_0__Bacteria;D_1__Firmicutes;D_2__Clostridia;D_3__Clostridiales;D_4__Clostridiales vadinBB60 group;__	0	0	0	0	0	0	0	0	0	0	0	0	0	0	0	0	0	0	0	0	0	0	0	0	0	0	0	0	0	0	0	0	0	0	0	0	0	0	0	0	0	0	0	0	0	0	0	0	0
D_0__Bacteria;D_1__Firmicutes;D_2__Clostridia;D_3__Clostridiales;D_4__Defluviitaleaceae;D_5__Defluviitaleaceae UCG-011	0.171233	0	0.0177219	0.0201532	0	0	0.0619344	0	0.090009	0	0	0	0.0441672	0	0.0343426	0	0	0	0	0.0180914	0.0672495	0	0.0371161	0.191108	0	0	0.0176658	0	0	0.243062	0	0	0	0.0136196	0	0	0	0	0	0	0	0	0.00649942	0	0	0	0	0	0.0342957
D_0__Bacteria;D_1__Firmicutes;D_2__Clostridia;D_3__Clostridiales;D_4__Eubacteriaceae;D_5__Anaerofustis	0	0	0	0	0	0	0	0	0	0	0	0	0	0	0	0	0	0	0	0	0	0	0	0	0	0	0	0	0	0	0	0	0	0	0	0	0	0	0	0	0	0	0	0	0	0	0	0	0
D_0__Bacteria;D_1__Firmicutes;D_2__Clostridia;D_3__Clostridiales;D_4__Eubacteriaceae;D_5__Eubacterium	0	0	0	0	0	0	0	0	0	0	0	0	0	0	0	0	0	0	0	0	0	0	0	0	0	0	0	0	0	0	0	0	0	0	0	0	0	0	0	0	0	0	0	0	0	0	0	0	0
D_0__Bacteria;D_1__Firmicutes;D_2__Clostridia;D_3__Clostridiales;D_4__Eubacteriaceae;D_5__Pseudoramibacter	0.0167875	0	0	0	0	0	0	0	0	0	0	0	0	0	0	0	0	0	0	0	0	0	0.0510346	0	0.00691252	0	0	0.0542152	0	0.00801303	0	0	0	0	0	0	0.00564239	0	0	0.0234064	0	0	0	0	0	0	0	0	0
D_0__Bacteria;D_1__Firmicutes;D_2__Clostridia;D_3__Clostridiales;D_4__Family XI;D_5__Anaerococcus	0	0	0	0	0	0	0	0	0	0	0	0	0	0	0	0	0	0	0	0	0	0	0	0	0	0	0	0	0	0	0	0	0	0	0	0	0	0	0	0	0	0	0	0	0	0	0.0107009	0	0
D_0__Bacteria;D_1__Firmicutes;D_2__Clostridia;D_3__Clostridiales;D_4__Family XI;D_5__Ezakiella	0.154445	0	0	0	0	0	0	0	0	0	0	0	0	0	0	0	0	0	0	0	0	0	0	0.213591	0	0	0	0.28463	0	0	0	0	0	0	0	0	0	0	0	0	0	0	0	0	0	0	0	0	0
D_0__Bacteria;D_1__Firmicutes;D_2__Clostridia;D_3__Clostridiales;D_4__Family XI;D_5__Finegoldia	0	0	0	0	0	0	0	0	0	0	0	0	0	0	0	0	0	0	0	0	0	0	0	0	0	0	0	0	0	0	0	0	0	0	0	0	0	0	0	0	0	0	0	0	0	0	0	0	0
D_0__Bacteria;D_1__Firmicutes;D_2__Clostridia;D_3__Clostridiales;D_4__Family XI;D_5__Gallicola	0	0	0	0	0	0	0	0	0	0	0	0	0	0	0	0	0	0	0	0	0	0	0	0	0	0	0	0	0	0	0	0	0	0	0	0	0	0	0	0	0	0	0	0	0	0	0	0	0
D_0__Bacteria;D_1__Firmicutes;D_2__Clostridia;D_3__Clostridiales;D_4__Family XI;D_5__Helcococcus	0	0	0	0	0	0	0	0	0	0	0	0	0	0	0	0	0	0	0	0	0	0	0	0	0	0	0	0	0	0	0	0	0	0	0	0	0	0	0	0	0	0	0	0	0	0	0	0	0
D_0__Bacteria;D_1__Firmicutes;D_2__Clostridia;D_3__Clostridiales;D_4__Family XI;D_5__Murdochiella	0	0	0	0	0	0	0	0	0	0	0	0	0	0	0	0	0	0	0	0	0	0	0	0	0	0	0	0	0	0	0	0	0	0	0	0	0	0	0.0291078	0	0	0	0	0	0	0	0	0	0
D_0__Bacteria;D_1__Firmicutes;D_2__Clostridia;D_3__Clostridiales;D_4__Family XI;D_5__Parvimonas	0.248456	0.0161421	0.637987	0.76582	0.789615	0.08	0.196126	0.702106	1.50015	0	0.35551	0.242131	0.215315	0.188816	0.412111	0.0912877	1.05188	0	0	0.140208	0.256771	0.065066	0.0417556	1.12978	0.362907	0.364092	0.211989	0.759013	0.235616	1.88573	0	0.053918	0	0	0.635018	1.25453	0.0507815	0	0.320186	0.148241	0	0.0485407	0.022748	0.0942888	0.0246503	0.214018	0.0642055	0.0279486	0.617322
D_0__Bacteria;D_1__Firmicutes;D_2__Clostridia;D_3__Clostridiales;D_4__Family XI;D_5__Peptoniphilus	0	0	0	0	0.0334582	0	0	0	0	0	0	0	0	0	0	0	0	0	0	0	0	0	0.00927902	0	0	0	0	0	0	0	0	0	0	0	0	0	0	0	0.0145539	0	0	0.0182028	0	0	0	0	0	0	0
D_0__Bacteria;D_1__Firmicutes;D_2__Clostridia;D_3__Clostridiales;D_4__Family XI;D_5__W5053	0	0	0.0177219	0	0	0	0	0	0	0.0127202	0	0	0	0	0	0	0	0	0	0	0	0	0	0	0	0	0	0	0	0	0	0	0	0	0	0	0	0	0	0	0	0	0	0	0	0	0	0	0
D_0__Bacteria;D_1__Firmicutes;D_2__Clostridia;D_3__Clostridiales;D_4__Family XIII;D_5__Family XIII AD3011 group	0	0	0	0	0	0	0	0	0	0	0	0	0	0	0	0	0	0	0	0	0	0	0	0	0	0	0	0.0474383	0	0	0	0	0	0	0	0	0	0	0	0	0	0	0	0	0	0	0	0	0
D_0__Bacteria;D_1__Firmicutes;D_2__Clostridia;D_3__Clostridiales;D_4__Family XIII;D_5__Family XIII UCG-001	0.0470051	0.00645682	0	0	0	0	0.0894608	0.031344	0	0	0.0190452	0	0	0	0	0	0.0355366	0	0.0224391	0.0361827	0	0.0455462	0	0.0505874	0.0241938	0	0.0353315	0	0	0.0267101	0	0.0479272	0.0443276	0	0.080148	0	0	0.0927146	0	0	0	0	0.0194982	0	0	0	0	0	0.0124712
D_0__Bacteria;D_1__Firmicutes;D_2__Clostridia;D_3__Clostridiales;D_4__Family XIII;D_5__Mogibacterium	0	0	0	0	0	0	0.0068816	0	0	0	0	0	0	0	0	0	0	0	0.0168294	0	0	0	0	0	0	0	0	0	0	0	0.00665845	0	0	0	0	0	0	0	0	0	0	0	0	0	0	0	0	0	0
D_0__Bacteria;D_1__Firmicutes;D_2__Clostridia;D_3__Clostridiales;D_4__Family XIII;D_5__S5-A14a	0	0	0	0	0	0	0	0	0	0	0	0	0	0	0	0	0	0	0	0	0	0	0	0	0	0	0	0	0	0	0	0	0	0	0	0	0	0	0	0	0	0	0	0	0	0	0	0	0
D_0__Bacteria;D_1__Firmicutes;D_2__Clostridia;D_3__Clostridiales;D_4__Family XIII;D_5__[Eubacterium] brachy group	0.0436476	0.0258273	0	0.0335886	0.214133	0	0	0	0.186019	0	0	0.0830163	0.0441672	0.0503509	0	0	0.355366	0	0	0	0.0917039	0	0	0.0393457	0.0276501	0.149218	0.100106	0.0271076	0.0722049	0.958893	0	0	0	0	0.0184957	0	0	0	0.135837	0.0780214	0	0.0242704	0.0129988	0.0404095	0	0	0.0428036	0	0.134065
D_0__Bacteria;D_1__Firmicutes;D_2__Clostridia;D_3__Clostridiales;D_4__Family XIII;D_5__[Eubacterium] nodatum group	0.547274	0.109766	0.341146	0.0604595	0.173983	0	0.313113	0.213139	0.684068	0.858615	0.1968	0.311311	0.281566	0.151053	0.629615	0.427911	0.191898	0.228351	0.370246	0.474898	0.0855903	0.0715726	0.0139185	0.511495	1.23734	0	0.206101	0.37273	0.334423	0.403323	0.399507	0.844716	0.376785	0.204295	0.95561	0.793531	0.595272	0.439174	0.0436618	0.296481	0.112392	0.169893	0.308722	0	0.0677883	0.62199	0.144462	0.265511	0.249423
D_0__Bacteria;D_1__Firmicutes;D_2__Clostridia;D_3__Clostridiales;D_4__Family XIII;D_5__[Eubacterium] saphenum group	0.0671501	0.0581114	0	0	0	0	0	0	0.060006	0	0	0	0	0	0.0343426	0	0	0	0	0	0.122272	0	0.018558	0.0899331	0.013825	0	0	0.189753	0	0.307166	0	0	0	0	0	0	0	0	0	0.0936257	0	0	0	0.00673491	0	0.0468165	0	0	0
D_0__Bacteria;D_1__Firmicutes;D_2__Clostridia;D_3__Clostridiales;D_4__Family XIII;D_5__uncultured	0.144373	0	0.239245	0	0.0267666	0	0.357843	0	0.0480048	0	0.0190452	0.186787	0.242919	0.0314693	0.251846	0	0	0	0	0.131162	0.15284	0	0	0.14052	0.0241938	0.0298436	0.153103	0.169423	0.0532036	0.149577	0	0.179727	0.0918215	0.281473	0	0	0	0.0634363	0.0291078	0	0	0	0.0454959	0	0	0	0	0	0.0374135
D_0__Bacteria;D_1__Firmicutes;D_2__Clostridia;D_3__Clostridiales;D_4__Family XIII;__	0	0	0	0	0	0	0	0	0	0	0	0	0	0	0	0	0	0	0	0	0	0	0	0	0	0	0	0	0	0	0	0	0	0	0	0	0	0	0	0	0	0	0	0	0	0	0	0	0
D_0__Bacteria;D_1__Firmicutes;D_2__Clostridia;D_3__Clostridiales;D_4__Lachnospiraceae;D_5__A2	0	0	0	0	0	0	0	0	0	0	0	0	0	0	0	0	0	0	0	0	0	0	0	0	0	0	0	0	0	0	0	0	0	0	0	0	0	0	0	0	0	0	0	0	0	0	0	0	0
D_0__Bacteria;D_1__Firmicutes;D_2__Clostridia;D_3__Clostridiales;D_4__Lachnospiraceae;D_5__Agathobacter	0	0	0	0	0	0	0	0	0	0	0	0	0	0	0	0	0	0	0	0	0	0	0	0	0	0	0	0	0	0	0	0	0	0	0	0	0	0	0	0	0	0	0	0	0	0	0	0	0
D_0__Bacteria;D_1__Firmicutes;D_2__Clostridia;D_3__Clostridiales;D_4__Lachnospiraceae;D_5__Anaerosporobacter	0	0	0	0	0	0	0	0	0	0	0	0	0	0	0	0	0	0	0	0	0	0	0	0	0	0	0	0	0	0	0	0	0	0	0	0	0	0	0	0	0	0	0	0	0	0	0	0	0
D_0__Bacteria;D_1__Firmicutes;D_2__Clostridia;D_3__Clostridiales;D_4__Lachnospiraceae;D_5__Anaerostipes	0	0	0	0	0	0	0	0	0	0	0	0	0	0	0	0	0	0	0	0	0	0	0	0	0	0.0119374	0	0	0	0	0	0	0	0	0	0	0	0	0	0	0	0	0	0	0	0	0	0	0
D_0__Bacteria;D_1__Firmicutes;D_2__Clostridia;D_3__Clostridiales;D_4__Lachnospiraceae;D_5__Blautia	0	0	0	0	0	0	0.0206448	0	0	0	0	0	0	0	0	0	0	0	0	0	0	0	0	0	0	0	0	0	0	0	0	0	0	0	0	0	0	0	0	0	0	0	0	0	0	0	0	0	0
D_0__Bacteria;D_1__Firmicutes;D_2__Clostridia;D_3__Clostridiales;D_4__Lachnospiraceae;D_5__Butyrivibrio 2	0.204808	0.0193705	0.0398742	0	0	0.024	0.0619344	0	0	0	0.215846	0	0	0.091261	0	0	0	0.0234206	0.0336587	0.293985	0	0	0	0	0.45277	0	0	0.0474383	0	0.178958	0.0199754	0	0.107653	0.108957	0.166461	0.151149	0.366755	0.0390377	0	0	0	0	0.0844924	0	0	0	0	0.0174679	0.0405313
D_0__Bacteria;D_1__Firmicutes;D_2__Clostridia;D_3__Clostridiales;D_4__Lachnospiraceae;D_5__CAG-56	0	0	0	0	0	0	0	0	0	0	0	0	0	0	0	0	0	0	0	0	0	0	0	0	0	0	0	0	0	0	0	0	0	0	0	0	0	0	0	0	0	0	0	0	0	0	0	0	0
D_0__Bacteria;D_1__Firmicutes;D_2__Clostridia;D_3__Clostridiales;D_4__Lachnospiraceae;D_5__Catonella	0.17459	0.0484262	0.327854	0.309015	0	0.24	0.615903	0.0501505	0	0	0.717369	0.0553442	0.215315	0.0220285	0.412111	0	0.113717	0.351309	0.336587	0	0	0	0	0	0.632496	0.137281	0.12366	0	0.0494034	0.641043	0.0532676	0.80278	0.142482	1.67068	0.228113	0	0.928172	1.17601	0.261971	0	0.0957416	0	0.428961	0.0235722	0	0.214018	0	0.09782	0.318015
D_0__Bacteria;D_1__Firmicutes;D_2__Clostridia;D_3__Clostridiales;D_4__Lachnospiraceae;D_5__Coprococcus 1	0	0	0	0	0	0	0	0	0	0	0	0	0	0	0	0	0	0	0	0	0	0	0	0	0	0	0	0	0	0	0	0	0	0	0	0	0	0	0	0	0	0	0	0	0	0	0	0	0
D_0__Bacteria;D_1__Firmicutes;D_2__Clostridia;D_3__Clostridiales;D_4__Lachnospiraceae;D_5__Coprococcus 2	0	0	0	0	0	0	0	0	0	0	0	0	0	0	0	0	0	0	0	0	0	0	0	0	0	0	0	0	0	0	0	0	0	0	0	0	0	0	0	0	0	0	0	0	0	0	0	0	0
D_0__Bacteria;D_1__Firmicutes;D_2__Clostridia;D_3__Clostridiales;D_4__Lachnospiraceae;D_5__Coprococcus 3	0	0	0	0	0	0	0	0	0	0	0	0	0	0	0	0	0	0	0	0	0	0	0	0	0	0	0	0	0	0	0	0	0	0	0	0	0	0	0	0	0	0	0	0	0	0	0	0	0
D_0__Bacteria;D_1__Firmicutes;D_2__Clostridia;D_3__Clostridiales;D_4__Lachnospiraceae;D_5__Cuneatibacter	0	0	0	0	0	0	0	0	0	0	0	0	0	0	0	0	0	0	0	0	0	0	0	0	0	0	0	0	0	0	0	0	0	0	0	0	0	0	0	0	0	0	0	0	0	0	0	0	0
D_0__Bacteria;D_1__Firmicutes;D_2__Clostridia;D_3__Clostridiales;D_4__Lachnospiraceae;D_5__Dorea	0	0	0	0	0	0	0	0	0	0	0	0	0	0	0	0	0	0	0	0	0	0	0	0	0	0	0	0	0	0	0	0	0	0	0	0	0	0	0	0	0	0	0	0	0	0	0	0	0
D_0__Bacteria;D_1__Firmicutes;D_2__Clostridia;D_3__Clostridiales;D_4__Lachnospiraceae;D_5__Eisenbergiella	0	0	0	0	0	0	0	0	0	0	0	0	0	0	0	0	0	0	0	0	0	0	0	0	0	0	0	0	0	0	0	0	0	0	0	0	0	0	0	0	0	0	0	0	0	0	0	0	0
D_0__Bacteria;D_1__Firmicutes;D_2__Clostridia;D_3__Clostridiales;D_4__Lachnospiraceae;D_5__Fusicatenibacter	0	0	0	0	0	0	0	0	0	0	0	0	0	0	0	0	0	0	0	0	0	0	0	0	0	0	0	0	0	0	0	0	0	0	0	0	0	0	0	0	0	0	0	0	0	0	0	0	0
D_0__Bacteria;D_1__Firmicutes;D_2__Clostridia;D_3__Clostridiales;D_4__Lachnospiraceae;D_5__GCA-900066575	0	0	0	0	0	0	0	0	0	0	0	0	0	0	0	0	0	0	0	0	0	0	0	0	0	0	0	0	0	0	0	0	0	0	0	0	0	0	0	0	0	0	0	0	0	0	0	0	0
D_0__Bacteria;D_1__Firmicutes;D_2__Clostridia;D_3__Clostridiales;D_4__Lachnospiraceae;D_5__GCA-900066755	0	0	0	0	0	0	0	0	0	0	0	0	0	0	0	0	0	0	0	0	0	0	0	0	0	0	0	0	0	0	0	0	0	0	0	0	0	0	0	0	0	0	0	0	0	0	0	0	0
D_0__Bacteria;D_1__Firmicutes;D_2__Clostridia;D_3__Clostridiales;D_4__Lachnospiraceae;D_5__Howardella	0	0	0	0	0	0	0	0	0	0	0	0	0	0	0	0	0	0	0	0	0	0	0	0	0	0	0	0	0	0	0	0	0	0	0	0	0	0	0	0	0	0	0	0	0	0	0	0.0104807	0
D_0__Bacteria;D_1__Firmicutes;D_2__Clostridia;D_3__Clostridiales;D_4__Lachnospiraceae;D_5__Hungatella	0	0	0	0	0	0	0	0	0	0	0	0	0	0	0	0	0	0	0	0	0	0	0	0	0	0	0	0	0	0	0	0	0	0	0	0	0	0	0	0	0	0	0	0	0	0	0	0	0
D_0__Bacteria;D_1__Firmicutes;D_2__Clostridia;D_3__Clostridiales;D_4__Lachnospiraceae;D_5__Incertae Sedis	0	0	0	0	0	0	0	0	0	0	0	0	0	0	0	0	0	0	0	0	0	0	0	0	0	0	0	0	0	0	0	0	0	0	0	0	0	0	0	0	0	0	0	0	0	0	0	0	0
D_0__Bacteria;D_1__Firmicutes;D_2__Clostridia;D_3__Clostridiales;D_4__Lachnospiraceae;D_5__Johnsonella	0	0.0193705	0.0620265	0	0	0	0	0.501505	0	0	0.114271	0	0.320212	0	0	0	0	0	0	0	0.0978174	0.0845859	0.018558	0.0281041	0	0	0	0	0.193813	0.181629	0	0	0	0.0680982	0	0	0	0.034158	0	0	0	0.030338	0.0259977	0	0	0	0	0	0.0717092
D_0__Bacteria;D_1__Firmicutes;D_2__Clostridia;D_3__Clostridiales;D_4__Lachnospiraceae;D_5__Lachnoanaerobaculum	0.496911	0.293785	0.270258	0.91361	0	0.288	0.392251	0.181795	0.228023	0.502449	0.399949	0.546524	0	0.503509	0.228951	0.171164	0.0142146	0.234206	0.381465	0.619629	0.116158	0.247251	0.463951	0	1.09909	0.960965	0	0.216861	0.342023	1.22867	0.702467	0.563144	0.668081	0.39043	0.782984	0.362757	1.29493	0.492851	0.936302	0.647577	0.520335	0	0.250227	0	0.351266	1.95292	0.422686	0.255031	0.791919
D_0__Bacteria;D_1__Firmicutes;D_2__Clostridia;D_3__Clostridiales;D_4__Lachnospiraceae;D_5__Lachnoclostridium	0	0	0	0	0	0	0	0	0	0	0	0	0	0	0	0	0	0	0	0	0	0	0	0	0	0	0	0	0	0	0	0	0	0	0	0	0	0	0	0	0	0	0	0	0	0	0	0	0
D_0__Bacteria;D_1__Firmicutes;D_2__Clostridia;D_3__Clostridiales;D_4__Lachnospiraceae;D_5__Lachnospira	0	0	0	0	0	0	0	0	0	0	0	0	0	0	0	0	0	0	0	0	0	0	0	0	0	0	0	0	0	0	0	0	0	0	0	0	0	0	0	0	0	0	0	0	0	0	0	0	0
D_0__Bacteria;D_1__Firmicutes;D_2__Clostridia;D_3__Clostridiales;D_4__Lachnospiraceae;D_5__Lachnospiraceae AC2044 group	0	0	0	0	0	0	0	0	0	0	0	0	0	0	0	0	0	0	0	0	0	0	0	0	0	0	0	0	0	0	0	0	0	0	0	0	0	0	0	0	0	0	0	0	0	0	0	0	0
D_0__Bacteria;D_1__Firmicutes;D_2__Clostridia;D_3__Clostridiales;D_4__Lachnospiraceae;D_5__Lachnospiraceae FCS020 group	0	0	0	0	0	0	0	0	0	0	0	0	0	0	0	0	0	0	0	0	0	0	0	0	0	0	0	0	0	0	0	0	0	0	0	0	0	0	0	0	0	0	0	0	0	0	0	0	0
D_0__Bacteria;D_1__Firmicutes;D_2__Clostridia;D_3__Clostridiales;D_4__Lachnospiraceae;D_5__Lachnospiraceae FE2018 group	0	0	0	0	0	0	0	0	0	0	0	0	0	0	0	0	0	0	0	0	0	0	0	0	0	0	0	0	0	0	0	0	0	0	0	0	0	0	0	0	0	0	0	0	0	0	0	0	0
D_0__Bacteria;D_1__Firmicutes;D_2__Clostridia;D_3__Clostridiales;D_4__Lachnospiraceae;D_5__Lachnospiraceae ND3007 group	0	0	0	0	0	0	0	0	0	0	0	0	0	0	0	0	0	0	0	0	0	0	0	0	0	0	0	0	0	0	0	0	0	0	0	0	0	0	0	0	0	0	0	0	0	0	0	0	0
D_0__Bacteria;D_1__Firmicutes;D_2__Clostridia;D_3__Clostridiales;D_4__Lachnospiraceae;D_5__Lachnospiraceae NK4A136 group	0	0	0	0	0	0	0	0	0	0	0	0	0	0	0	0	0	0.0234206	0	0	0	0	0	0	0	0	0	0	0	0	0	0.0119818	0	0	0	0	0	0	0	0	0	0	0	0	0	0	0	0	0
D_0__Bacteria;D_1__Firmicutes;D_2__Clostridia;D_3__Clostridiales;D_4__Lachnospiraceae;D_5__Lachnospiraceae NK4B4 group	0	0	0	0	0	0	0	0	0	0	0	0	0	0	0	0	0	0	0	0	0	0	0	0	0	0	0	0	0	0	0	0	0	0	0	0	0	0	0	0	0	0	0	0	0	0	0	0	0
D_0__Bacteria;D_1__Firmicutes;D_2__Clostridia;D_3__Clostridiales;D_4__Lachnospiraceae;D_5__Lachnospiraceae UCG-001	0	0	0	0	0	0	0	0	0	0	0	0	0	0	0	0	0	0	0	0	0	0	0	0	0	0	0	0	0	0	0	0	0	0	0	0	0	0	0	0	0	0	0	0	0	0	0	0	0
D_0__Bacteria;D_1__Firmicutes;D_2__Clostridia;D_3__Clostridiales;D_4__Lachnospiraceae;D_5__Lachnospiraceae UCG-002	0	0	0	0	0	0	0	0	0	0	0	0	0	0	0	0	0	0	0	0	0	0	0	0	0	0	0	0	0	0	0	0	0	0	0	0	0	0	0	0	0	0	0	0	0	0	0	0	0
D_0__Bacteria;D_1__Firmicutes;D_2__Clostridia;D_3__Clostridiales;D_4__Lachnospiraceae;D_5__Lachnospiraceae UCG-004	0	0	0	0	0	0	0	0	0	0	0	0	0	0	0	0	0	0	0	0	0	0	0	0	0	0	0	0	0	0	0	0	0	0	0	0	0	0	0	0	0	0	0	0	0	0	0	0	0
D_0__Bacteria;D_1__Firmicutes;D_2__Clostridia;D_3__Clostridiales;D_4__Lachnospiraceae;D_5__Lachnospiraceae UCG-006	0	0	0	0	0	0	0	0	0	0	0	0	0	0	0	0	0	0	0	0	0	0	0	0	0	0	0	0	0	0	0	0	0	0	0	0	0	0	0	0	0	0	0	0	0	0	0	0	0
D_0__Bacteria;D_1__Firmicutes;D_2__Clostridia;D_3__Clostridiales;D_4__Lachnospiraceae;D_5__Lachnospiraceae UCG-008	0	0	0	0	0	0	0	0	0	0	0	0	0	0	0	0	0	0	0	0	0	0	0	0	0	0	0	0	0	0	0	0	0	0	0	0	0	0	0	0	0	0	0	0	0	0	0	0	0
D_0__Bacteria;D_1__Firmicutes;D_2__Clostridia;D_3__Clostridiales;D_4__Lachnospiraceae;D_5__Lachnospiraceae UCG-010	0	0	0	0	0	0	0	0	0	0	0	0	0	0	0	0	0	0	0	0	0	0	0	0	0	0	0	0	0	0	0	0	0	0	0	0	0	0	0	0	0	0	0	0	0	0	0	0	0
D_0__Bacteria;D_1__Firmicutes;D_2__Clostridia;D_3__Clostridiales;D_4__Lachnospiraceae;D_5__Lactonifactor	0	0	0	0	0	0	0	0	0	0	0	0	0	0	0	0	0	0	0	0	0	0	0	0	0	0	0	0	0	0	0	0	0	0	0	0	0	0	0	0	0	0	0	0	0	0	0	0	0
D_0__Bacteria;D_1__Firmicutes;D_2__Clostridia;D_3__Clostridiales;D_4__Lachnospiraceae;D_5__Marvinbryantia	0	0	0	0	0	0	0	0	0	0	0	0	0	0	0	0	0	0	0	0	0	0	0	0	0	0	0	0	0	0	0	0	0	0	0	0	0	0	0	0	0	0	0	0	0	0	0	0	0
D_0__Bacteria;D_1__Firmicutes;D_2__Clostridia;D_3__Clostridiales;D_4__Lachnospiraceae;D_5__Moryella	0	0	0	0	0	0	0	0	0	0	0	0	0	0	0	0	0	0	0	0	0	0	0	0	0	0	0	0	0	0	0	0	0	0	0	0	0	0	0	0	0	0	0	0	0	0	0	0	0
D_0__Bacteria;D_1__Firmicutes;D_2__Clostridia;D_3__Clostridiales;D_4__Lachnospiraceae;D_5__Oribacterium	0.21488	0.342211	0.137344	0.806127	0	0.632	1.34535	0.200602	0.546055	0.0636011	2.24099	0.401245	0.055209	0.623092	0.990212	0.570548	0.262971	0.532818	0.762931	0.257802	0.611359	0.683193	0.0324766	0.151762	1.80071	0.51331	0.323872	0	0.228016	0.355245	0.715784	1.0544	0.62692	1.14859	0.339088	0.302297	3.63088	1.62495	0.737399	0	0.566124	0.412596	0.253477	0	0.184877	0.193954	0.438737	1.13192	1.8582
D_0__Bacteria;D_1__Firmicutes;D_2__Clostridia;D_3__Clostridiales;D_4__Lachnospiraceae;D_5__Robinsoniella	0	0	0	0	0	0	0	0	0	0	0	0	0	0	0	0	0	0	0	0	0	0	0	0	0	0	0	0	0	0	0	0	0	0	0	0	0	0	0	0	0	0	0	0	0	0	0	0	0
D_0__Bacteria;D_1__Firmicutes;D_2__Clostridia;D_3__Clostridiales;D_4__Lachnospiraceae;D_5__Roseburia	0	0	0	0	0	0	0	0	0	0	0	0	0	0	0	0	0	0	0	0	0	0	0	0	0	0	0	0	0	0	0	0	0	0	0	0	0	0	0	0	0	0	0	0	0	0	0	0	0
D_0__Bacteria;D_1__Firmicutes;D_2__Clostridia;D_3__Clostridiales;D_4__Lachnospiraceae;D_5__Sellimonas	0	0	0	0	0	0	0	0	0	0	0	0	0	0	0	0	0	0	0	0	0	0	0	0	0	0	0	0	0	0	0	0	0	0	0	0	0	0	0	0	0	0	0	0	0	0	0	0	0
D_0__Bacteria;D_1__Firmicutes;D_2__Clostridia;D_3__Clostridiales;D_4__Lachnospiraceae;D_5__Shuttleworthia	0.0604351	0	0.0443046	0	0	0	0	0	0.108011	0	0	0	0	0	0	0	0	0	0	0	0	0	0	0.0281041	0	0	0	0	0.0266018	0.0854724	0	0	0	0	0	0	0	0	0	0	0	0	0	0	0	0	0	0	0.0187067
D_0__Bacteria;D_1__Firmicutes;D_2__Clostridia;D_3__Clostridiales;D_4__Lachnospiraceae;D_5__Stomatobaculum	0.523771	0	0.199371	0.201532	0.180675	0	0.196126	0.0188064	0.240024	0	0	0.124524	0	0.223432	0.240398	0.119815	0.319829	0	0.230001	0.330167	0.30568	0.201705	0.310847	0.118037	0.48042	0	0	0.28463	0.0912062	0.691792	0.572627	0.137791	0.275465	0.186135	0.388409	0	0.426	0.395257	0.252268	0.343294	0.0999043	0	0.159236	0	0.0924385	0.615302	0.321027	0.167691	0.405313
D_0__Bacteria;D_1__Firmicutes;D_2__Clostridia;D_3__Clostridiales;D_4__Lachnospiraceae;D_5__Tyzzerella	0	0	0	0	0	0	0	0	0	0	0	0	0	0	0	0	0	0	0	0	0	0	0	0	0	0	0	0	0	0	0	0	0	0	0	0	0	0	0	0	0	0	0	0	0	0	0	0	0
D_0__Bacteria;D_1__Firmicutes;D_2__Clostridia;D_3__Clostridiales;D_4__Lachnospiraceae;D_5__Tyzzerella 3	0	0	0	0	0	0	0	0	0	0	0	0	0	0	0	0	0	0	0	0	0	0	0	0	0	0	0	0	0	0	0	0	0	0	0	0	0	0	0	0	0	0	0	0	0	0	0	0	0
D_0__Bacteria;D_1__Firmicutes;D_2__Clostridia;D_3__Clostridiales;D_4__Lachnospiraceae;D_5__Tyzzerella 4	0	0	0	0	0	0	0	0	0	0	0	0	0	0	0	0	0	0	0	0	0	0	0	0	0	0	0	0	0	0	0	0	0	0	0	0	0	0	0	0	0	0	0	0	0	0	0	0	0
D_0__Bacteria;D_1__Firmicutes;D_2__Clostridia;D_3__Clostridiales;D_4__Lachnospiraceae;D_5__UC5-1-2E3	0	0	0	0	0	0	0	0	0	0	0	0	0	0	0	0	0	0	0	0	0	0	0	0	0	0	0	0	0	0	0	0	0	0	0	0	0	0	0	0	0	0	0	0	0	0	0	0	0
D_0__Bacteria;D_1__Firmicutes;D_2__Clostridia;D_3__Clostridiales;D_4__Lachnospiraceae;D_5__[Eubacterium] eligens group	0	0	0	0	0	0	0	0	0	0	0	0	0	0	0	0	0	0	0	0	0	0	0	0	0	0	0	0	0	0	0	0	0	0	0	0	0	0	0	0	0	0	0	0	0	0	0	0	0
D_0__Bacteria;D_1__Firmicutes;D_2__Clostridia;D_3__Clostridiales;D_4__Lachnospiraceae;D_5__[Eubacterium] fissicatena group	0	0	0	0	0	0	0	0	0	0	0	0	0	0	0	0	0	0	0	0	0	0	0	0	0	0	0	0	0	0	0	0	0	0	0	0	0	0	0	0	0	0	0	0	0	0	0	0	0
D_0__Bacteria;D_1__Firmicutes;D_2__Clostridia;D_3__Clostridiales;D_4__Lachnospiraceae;D_5__[Eubacterium] hallii group	0	0	0	0	0	0	0	0	0	0	0	0	0	0	0	0	0	0	0	0	0	0	0	0	0	0	0	0	0	0	0	0	0	0	0	0	0	0	0	0	0	0	0	0	0	0	0	0	0
D_0__Bacteria;D_1__Firmicutes;D_2__Clostridia;D_3__Clostridiales;D_4__Lachnospiraceae;D_5__[Eubacterium] ruminantium group	0	0	0	0	0	0	0	0	0	0	0	0	0	0	0	0	0	0	0	0	0	0	0	0	0	0	0	0	0	0	0	0	0	0	0	0	0	0	0	0	0	0	0	0	0	0	0	0	0
D_0__Bacteria;D_1__Firmicutes;D_2__Clostridia;D_3__Clostridiales;D_4__Lachnospiraceae;D_5__[Eubacterium] ventriosum group	0	0	0	0	0	0	0	0	0	0	0	0	0	0	0	0	0	0	0	0	0	0	0	0	0	0	0	0	0	0	0	0	0	0	0	0	0	0	0	0	0	0	0	0	0	0	0	0	0
D_0__Bacteria;D_1__Firmicutes;D_2__Clostridia;D_3__Clostridiales;D_4__Lachnospiraceae;D_5__[Eubacterium] xylanophilum group	0	0	0	0	0	0	0	0	0	0	0	0	0	0	0	0	0	0	0	0	0	0	0	0	0	0	0	0	0	0	0	0	0	0	0	0	0	0	0	0	0	0	0	0	0	0	0	0	0
D_0__Bacteria;D_1__Firmicutes;D_2__Clostridia;D_3__Clostridiales;D_4__Lachnospiraceae;D_5__[Ruminococcus] gauvreauii group	0	0	0	0	0	0	0	0	0	0	0	0	0	0	0	0	0	0	0	0	0	0	0	0	0	0	0	0	0	0	0	0	0	0	0	0	0	0	0	0	0	0	0	0	0	0	0	0	0
D_0__Bacteria;D_1__Firmicutes;D_2__Clostridia;D_3__Clostridiales;D_4__Lachnospiraceae;D_5__[Ruminococcus] gnavus group	0	0	0	0	0	0	0	0	0	0	0	0	0	0	0	0	0	0	0	0	0	0	0	0	0	0	0	0	0	0	0	0	0	0	0	0	0	0	0	0	0	0	0	0	0	0	0	0	0
D_0__Bacteria;D_1__Firmicutes;D_2__Clostridia;D_3__Clostridiales;D_4__Lachnospiraceae;D_5__[Ruminococcus] torques group	0	0	0	0	0	0	0	0	0	0	0	0	0	0	0	0	0	0	0	0	0	0	0	0	0	0	0	0	0	0	0	0	0	0	0	0	0	0	0	0	0	0	0	0	0	0	0	0	0
D_0__Bacteria;D_1__Firmicutes;D_2__Clostridia;D_3__Clostridiales;D_4__Lachnospiraceae;D_5__uncultured	0	0	0	0	0	0	0	0	0	0	0	0	0	0	0	0	0	0	0	0	0	0	0	0	0	0	0	0	0	0	0	0	0	0	0	0	0	0	0	0	0	0	0	0	0	0	0	0	0
D_0__Bacteria;D_1__Firmicutes;D_2__Clostridia;D_3__Clostridiales;D_4__Lachnospiraceae;D_5__uncultured organism	0	0	0	0	0	0	0	0	0	0	0	0	0	0	0	0	0	0	0	0	0	0	0	0	0	0	0	0	0	0	0	0	0	0	0	0	0	0	0	0	0	0	0	0	0	0	0	0	0
D_0__Bacteria;D_1__Firmicutes;D_2__Clostridia;D_3__Clostridiales;D_4__Lachnospiraceae;__	0.789014	0.213075	0.0886093	1.26965	0.0736081	0	1.10794	0	0.672067	0.623291	0.876079	0.186787	0	0	0.074409	0	0.646766	0.837286	0	0.877431	0.0427951	0.175678	0.143825	0.179866	2.72699	0	0.229655	0.494714	0.558638	0.721173	0.223058	0.215672	2.0549	0.472148	0.265105	0.234281	0	1.23945	0	1.69306	0.166507	0.0182028	0.718185	0	0.271153	1.33761	0.518994	0	0.420902
D_0__Bacteria;D_1__Firmicutes;D_2__Clostridia;D_3__Clostridiales;D_4__Peptococcaceae;D_5__Peptococcus	0.0805802	0	0.115192	0	0	0	0.12731	0.137914	0.150015	0	0	0	0.198752	0.0314693	0.234675	0.0855822	0	0	0.140245	0.122117	0.15284	0	0	0	0	0	0	0.155869	0	0.200326	0	0.275581	0	0.0817179	0.0986436	0.120919	0	0.161031	0	0	0	0.0728111	0.116989	0	0	0	0	0.073365	0.0498846
D_0__Bacteria;D_1__Firmicutes;D_2__Clostridia;D_3__Clostridiales;D_4__Peptococcaceae;D_5__uncultured	0	0	0	0	0	0	0	0	0	0	0	0	0	0	0	0	0	0	0	0	0	0	0	0	0	0	0	0	0	0	0	0	0	0	0	0	0	0	0	0	0	0	0	0	0	0	0	0	0
D_0__Bacteria;D_1__Firmicutes;D_2__Clostridia;D_3__Clostridiales;D_4__Peptostreptococcaceae;D_5__Clostridioides	0	0	0	0	0	0	0	0	0	0	0	0	0	0	0	0	0	0	0	0	0	0	0	0	0	0	0	0	0	0	0	0	0	0	0	0	0	0	0	0	0	0	0	0	0	0	0	0	0
D_0__Bacteria;D_1__Firmicutes;D_2__Clostridia;D_3__Clostridiales;D_4__Peptostreptococcaceae;D_5__Criibacterium bergeronii	0	0	0	0	0	0	0	0	0	0	0	0	0	0	0	0	0	0	0	0	0	0	0	0	0	0	0	0	0	0	0	0	0	0	0	0	0	0	0	0	0	0	0	0	0	0	0	0	0
D_0__Bacteria;D_1__Firmicutes;D_2__Clostridia;D_3__Clostridiales;D_4__Peptostreptococcaceae;D_5__Filifactor	0.389471	0.0225989	0.0221523	0	0	0	0	0	0.312031	0	0	0	0.0331254	0	0	0	0.199005	0	0	0	0.195635	0	0.0649531	0.438424	0	0.0835621	0	0.745459	0.0684047	0.544886	0	0	0	0	0	0	0	0	0.0145539	0	0.0166507	0	0	0.0202047	0	0.0401284	0.0856073	0	0.230716
D_0__Bacteria;D_1__Firmicutes;D_2__Clostridia;D_3__Clostridiales;D_4__Peptostreptococcaceae;D_5__Intestinibacter	0	0	0	0	0	0	0	0	0	0	0	0	0	0	0	0	0	0	0	0	0	0	0	0	0	0	0	0	0	0	0	0	0	0	0	0	0	0	0	0	0	0	0	0	0	0	0	0	0
D_0__Bacteria;D_1__Firmicutes;D_2__Clostridia;D_3__Clostridiales;D_4__Peptostreptococcaceae;D_5__Peptostreptococcus	1.44709	0.623083	3.61083	0.302297	0	0	1.1217	1.79288	2.85629	0.470648	0.292026	0.518852	1.33054	0	2.73596	0.992754	0.127932	0.579659	1.13879	1.47445	0.519655	0.455462	0.0835112	3.76033	0.947016	0	1.16005	1.01654	1.99894	0.862737	0.349569	4.00791	0.801064	0.898897	2.96547	2.90961	0.135417	0.824672	0.063067	0.678786	0.299713	0.473272	1.03016	0	0.295803	0.394596	0.545746	0.4891	0.816861
D_0__Bacteria;D_1__Firmicutes;D_2__Clostridia;D_3__Clostridiales;D_4__Peptostreptococcaceae;D_5__Romboutsia	0	0	0	0	0	0	0	0	0	0	0	0	0	0	0	0	0	0	0	0	0	0	0	0	0	0	0	0	0	0	0	0	0	0	0	0	0	0	0	0	0	0	0	0	0	0	0	0	0
D_0__Bacteria;D_1__Firmicutes;D_2__Clostridia;D_3__Clostridiales;D_4__Peptostreptococcaceae;D_5__[Eubacterium] yurii group	0	0	0.0354437	0	0	0	0	0	0	0	0.0253936	0.10377	0.0938552	0	0.114475	0	0	0.105393	0.129025	0.0497512	0.165067	0	0	0.0281041	0	0	0.0942174	0	0.0456031	0.122867	0	0.1318	0.0189976	0.154356	0	0	0	0.0292783	0	0	0	0	0	0.0774515	0	0	0	0	0.0124712
D_0__Bacteria;D_1__Firmicutes;D_2__Clostridia;D_3__Clostridiales;D_4__Peptostreptococcaceae;D_5__uncultured	0	0	0	0	0	0	0	0	0	0	0	0	0	0	0	0	0	0	0	0	0	0	0	0	0	0	0	0	0	0	0	0	0	0	0	0	0	0	0	0	0	0	0	0	0	0	0	0	0
D_0__Bacteria;D_1__Firmicutes;D_2__Clostridia;D_3__Clostridiales;D_4__Peptostreptococcaceae;D_5__uncultured Eubacteriaceae bacterium	0.1343	0	0	0	0	0	0	0	0	0	0	0	0	0	0	0	0	0	0	0	0	0	0	0.1349	0	0	0	0	0	0	0	0	0	0	0	0	0	0	0	0	0	0	0	0	0	0	0	0	0
D_0__Bacteria;D_1__Firmicutes;D_2__Clostridia;D_3__Clostridiales;D_4__Peptostreptococcaceae;__	0	0	0	0	0	0	0	0	0	0	0	0	0	0	0	0	0	0	0	0	0	0	0	0	0	0	0	0	0	0	0	0	0	0	0	0	0	0	0	0	0	0	0	0	0	0	0	0	0
D_0__Bacteria;D_1__Firmicutes;D_2__Clostridia;D_3__Clostridiales;D_4__Ruminococcaceae;D_5__Acetanaerobacterium	0	0	0	0	0	0	0	0	0	0	0	0	0	0	0	0	0	0	0	0	0	0	0	0	0	0	0	0	0	0	0	0	0	0	0	0	0	0	0	0	0	0	0	0	0	0	0	0	0
D_0__Bacteria;D_1__Firmicutes;D_2__Clostridia;D_3__Clostridiales;D_4__Ruminococcaceae;D_5__Anaerofilum	0	0	0	0	0	0	0	0	0	0	0	0	0	0	0	0	0	0	0	0	0	0	0	0	0	0	0	0	0	0	0	0	0	0	0	0	0	0	0	0	0	0	0	0	0	0	0	0	0
D_0__Bacteria;D_1__Firmicutes;D_2__Clostridia;D_3__Clostridiales;D_4__Ruminococcaceae;D_5__Anaerotruncus	0	0	0	0	0	0	0	0	0	0	0	0	0	0	0	0	0	0	0	0	0	0	0	0	0	0	0	0	0	0	0	0	0	0	0	0	0	0	0	0	0	0	0	0	0	0	0	0	0
D_0__Bacteria;D_1__Firmicutes;D_2__Clostridia;D_3__Clostridiales;D_4__Ruminococcaceae;D_5__Butyricicoccus	0	0	0	0	0	0	0	0	0	0	0	0	0	0	0	0	0	0	0	0	0	0	0	0	0	0	0	0	0	0	0	0	0	0	0	0	0	0	0	0	0	0	0	0	0	0	0	0	0
D_0__Bacteria;D_1__Firmicutes;D_2__Clostridia;D_3__Clostridiales;D_4__Ruminococcaceae;D_5__Candidatus Soleaferrea	0	0	0	0	0	0	0	0	0	0	0	0	0	0	0	0	0	0	0	0	0	0	0	0	0	0	0	0	0	0	0	0	0	0	0	0	0	0	0	0	0	0	0	0	0	0	0	0	0
D_0__Bacteria;D_1__Firmicutes;D_2__Clostridia;D_3__Clostridiales;D_4__Ruminococcaceae;D_5__DTU089	0	0	0	0	0	0	0	0	0	0	0	0	0	0	0	0	0	0	0	0	0	0	0	0	0	0	0	0	0	0	0	0	0	0	0	0	0	0	0	0	0	0	0	0	0	0	0	0	0
D_0__Bacteria;D_1__Firmicutes;D_2__Clostridia;D_3__Clostridiales;D_4__Ruminococcaceae;D_5__Faecalibacterium	0	0	0	0	0	0	0	0	0	0	0	0	0	0	0	0	0	0	0	0	0	0.0130132	0	0	0	0	0	0	0	0	0	0	0	0	0	0	0	0	0	0	0	0	0	0	0	0	0	0	0
D_0__Bacteria;D_1__Firmicutes;D_2__Clostridia;D_3__Clostridiales;D_4__Ruminococcaceae;D_5__Fastidiosipila	0	0	0	0	0	0	0	0	0	0	0	0	0	0	0	0	0	0	0	0	0	0	0	0	0	0	0	0	0	0	0	0	0	0	0	0	0	0	0	0	0	0	0	0	0	0	0	0	0
D_0__Bacteria;D_1__Firmicutes;D_2__Clostridia;D_3__Clostridiales;D_4__Ruminococcaceae;D_5__Flavonifractor	0	0	0	0	0	0	0	0	0	0	0	0	0	0	0	0	0	0	0	0	0	0	0	0	0	0	0	0	0	0	0	0	0	0	0	0	0	0	0	0	0	0	0	0	0	0	0	0	0
D_0__Bacteria;D_1__Firmicutes;D_2__Clostridia;D_3__Clostridiales;D_4__Ruminococcaceae;D_5__Fournierella	0	0	0	0	0	0	0	0	0	0	0	0	0	0	0	0	0	0	0	0	0	0	0	0	0	0	0	0	0	0	0	0	0	0	0	0	0	0	0	0	0	0	0	0	0	0	0	0	0
D_0__Bacteria;D_1__Firmicutes;D_2__Clostridia;D_3__Clostridiales;D_4__Ruminococcaceae;D_5__GCA-900066225	0	0	0	0	0	0	0	0	0	0	0	0	0	0	0	0	0	0	0	0	0	0	0	0	0	0	0	0	0	0	0	0	0	0	0	0	0	0	0	0	0	0	0	0	0	0	0	0	0
D_0__Bacteria;D_1__Firmicutes;D_2__Clostridia;D_3__Clostridiales;D_4__Ruminococcaceae;D_5__Harryflintia	0	0	0	0	0	0	0	0	0	0	0	0	0	0	0	0	0	0	0	0	0	0	0	0	0	0	0	0	0	0	0	0	0	0	0	0	0	0	0	0	0	0	0	0	0	0	0	0	0
D_0__Bacteria;D_1__Firmicutes;D_2__Clostridia;D_3__Clostridiales;D_4__Ruminococcaceae;D_5__Hydrogenoanaerobacterium	0	0	0	0	0	0	0	0	0	0	0	0	0	0	0	0	0	0	0	0	0	0	0	0	0	0	0	0	0	0	0	0	0	0	0	0	0	0	0	0	0	0	0	0	0	0	0	0	0
D_0__Bacteria;D_1__Firmicutes;D_2__Clostridia;D_3__Clostridiales;D_4__Ruminococcaceae;D_5__Intestinimonas	0	0	0	0	0	0	0	0	0	0	0	0	0	0	0	0	0	0	0	0	0	0	0	0	0	0	0	0	0	0	0	0	0	0	0	0	0	0	0	0	0	0	0	0	0	0	0	0	0
D_0__Bacteria;D_1__Firmicutes;D_2__Clostridia;D_3__Clostridiales;D_4__Ruminococcaceae;D_5__Negativibacillus	0	0	0	0	0	0	0	0	0	0	0	0	0	0	0	0	0	0	0	0	0	0	0	0	0	0	0	0	0	0	0	0	0	0	0	0	0	0	0	0	0	0	0	0	0	0	0	0	0
D_0__Bacteria;D_1__Firmicutes;D_2__Clostridia;D_3__Clostridiales;D_4__Ruminococcaceae;D_5__Oscillibacter	0	0	0	0	0	0	0	0	0	0	0	0	0	0	0	0	0	0	0	0	0	0	0	0	0	0	0	0	0	0	0	0	0	0	0	0	0	0	0	0	0	0	0	0	0	0	0	0	0
D_0__Bacteria;D_1__Firmicutes;D_2__Clostridia;D_3__Clostridiales;D_4__Ruminococcaceae;D_5__Oscillospira	0	0	0	0	0	0	0	0	0	0	0	0	0	0	0	0	0	0	0	0	0	0	0	0	0	0	0	0	0	0	0	0	0	0	0	0	0	0	0	0	0	0	0	0	0	0	0	0	0
D_0__Bacteria;D_1__Firmicutes;D_2__Clostridia;D_3__Clostridiales;D_4__Ruminococcaceae;D_5__Phocea	0	0	0	0	0	0	0	0	0	0	0	0	0	0	0	0	0	0	0	0	0	0	0	0	0	0	0	0	0	0	0	0	0	0	0	0	0	0	0	0	0	0	0	0	0	0	0	0	0
D_0__Bacteria;D_1__Firmicutes;D_2__Clostridia;D_3__Clostridiales;D_4__Ruminococcaceae;D_5__Ruminiclostridium	0	0	0	0	0	0	0	0	0	0	0	0	0	0	0	0	0	0	0	0	0	0	0	0	0	0	0	0	0	0	0	0	0	0	0	0	0	0	0	0	0	0	0	0	0	0	0	0	0
D_0__Bacteria;D_1__Firmicutes;D_2__Clostridia;D_3__Clostridiales;D_4__Ruminococcaceae;D_5__Ruminiclostridium 5	0	0	0	0	0	0	0	0	0	0	0	0	0	0	0	0	0	0	0	0	0	0	0	0	0	0	0	0	0	0	0	0	0	0	0	0	0	0	0	0	0	0	0	0	0	0	0	0	0
D_0__Bacteria;D_1__Firmicutes;D_2__Clostridia;D_3__Clostridiales;D_4__Ruminococcaceae;D_5__Ruminiclostridium 6	0	0	0	0	0	0	0	0	0	0	0	0	0	0	0	0	0	0	0	0	0	0	0	0	0	0	0	0	0	0	0	0	0	0	0	0	0	0	0	0	0	0	0	0	0	0	0	0	0
D_0__Bacteria;D_1__Firmicutes;D_2__Clostridia;D_3__Clostridiales;D_4__Ruminococcaceae;D_5__Ruminiclostridium 9	0	0	0	0	0	0	0	0	0	0	0	0	0	0	0	0	0	0	0	0	0	0	0	0	0	0	0	0	0	0	0	0.0119818	0	0	0	0	0	0	0	0	0	0	0	0	0	0	0	0	0
D_0__Bacteria;D_1__Firmicutes;D_2__Clostridia;D_3__Clostridiales;D_4__Ruminococcaceae;D_5__Ruminococcaceae NK4A214 group	0	0	0	0	0	0	0	0	0	0	0	0	0	0	0	0	0	0	0	0	0	0	0	0	0	0	0	0	0	0	0	0	0	0	0	0	0	0	0	0	0	0	0	0	0	0	0	0	0
D_0__Bacteria;D_1__Firmicutes;D_2__Clostridia;D_3__Clostridiales;D_4__Ruminococcaceae;D_5__Ruminococcaceae UCG-002	0	0	0	0	0	0	0	0	0	0	0	0	0	0	0	0	0	0	0	0	0	0	0	0	0	0	0	0	0	0	0	0	0	0	0	0	0	0	0	0	0	0	0	0	0	0	0	0	0
D_0__Bacteria;D_1__Firmicutes;D_2__Clostridia;D_3__Clostridiales;D_4__Ruminococcaceae;D_5__Ruminococcaceae UCG-003	0	0	0	0	0	0	0	0	0	0	0	0	0	0	0	0	0	0	0	0	0	0	0	0	0	0	0	0	0	0	0	0	0	0	0	0	0	0	0	0	0	0	0	0	0	0	0	0	0
D_0__Bacteria;D_1__Firmicutes;D_2__Clostridia;D_3__Clostridiales;D_4__Ruminococcaceae;D_5__Ruminococcaceae UCG-004	0	0	0	0	0	0	0	0	0	0	0	0	0	0	0	0	0	0	0	0	0	0	0	0	0	0	0	0	0	0	0	0	0	0	0	0	0	0	0	0	0	0	0	0	0	0	0	0	0
D_0__Bacteria;D_1__Firmicutes;D_2__Clostridia;D_3__Clostridiales;D_4__Ruminococcaceae;D_5__Ruminococcaceae UCG-005	0	0	0	0	0	0	0	0	0	0	0	0	0	0	0	0	0	0	0	0	0	0	0	0	0	0	0	0	0	0	0	0	0	0	0	0	0	0	0	0	0	0	0	0	0	0	0	0	0
D_0__Bacteria;D_1__Firmicutes;D_2__Clostridia;D_3__Clostridiales;D_4__Ruminococcaceae;D_5__Ruminococcaceae UCG-009	0	0	0	0	0	0	0	0	0	0	0	0	0	0	0	0	0	0	0	0	0	0	0	0	0	0	0	0	0	0	0	0	0	0	0	0	0	0	0	0	0	0	0	0	0	0	0	0	0
D_0__Bacteria;D_1__Firmicutes;D_2__Clostridia;D_3__Clostridiales;D_4__Ruminococcaceae;D_5__Ruminococcaceae UCG-010	0	0	0	0	0	0	0	0	0	0	0	0	0	0	0	0	0	0	0	0	0	0	0	0	0	0	0	0	0	0	0	0	0	0	0	0	0	0	0	0	0	0	0	0	0	0	0	0	0
D_0__Bacteria;D_1__Firmicutes;D_2__Clostridia;D_3__Clostridiales;D_4__Ruminococcaceae;D_5__Ruminococcaceae UCG-013	0	0	0	0	0	0	0	0	0	0	0	0	0	0	0	0	0	0	0	0	0	0	0	0	0	0	0	0	0	0	0	0	0	0	0	0	0	0	0	0	0	0	0	0	0	0	0	0	0
D_0__Bacteria;D_1__Firmicutes;D_2__Clostridia;D_3__Clostridiales;D_4__Ruminococcaceae;D_5__Ruminococcaceae UCG-014	4.21367	0.5682	2.49878	0.100766	0.294433	1.056	4.3767	1.25376	0.156016	1.18298	1.33951	0.0968523	0.966157	0.0849671	2.35819	0.216808	0.945274	1.20616	1.09391	3.02578	0.421838	0.117119	0.222696	2.79917	0.732727	0.799809	1.66647	1.13852	0.969066	1.35954	1.77115	1.2521	3.31507	2.28356	2.78668	1.53416	1.69272	5.02611	1.15461	0.43692	0.0707655	0	0.900169	0.660022	1.01066	0.374532	0.283574	0.29346	1.09123
D_0__Bacteria;D_1__Firmicutes;D_2__Clostridia;D_3__Clostridiales;D_4__Ruminococcaceae;D_5__Ruminococcus 1	0	0	0	0	0	0	0	0	0	0	0	0	0	0	0	0	0	0	0	0	0	0	0	0	0	0	0	0	0	0	0	0	0	0	0	0	0	0	0	0	0	0	0	0	0	0	0	0	0
D_0__Bacteria;D_1__Firmicutes;D_2__Clostridia;D_3__Clostridiales;D_4__Ruminococcaceae;D_5__Ruminococcus 2	0	0	0	0	0	0	0	0	0	0	0	0	0	0	0	0	0	0	0	0	0	0	0	0	0	0	0	0	0	0	0	0	0	0	0	0	0	0	0	0	0	0	0	0	0	0	0	0	0
D_0__Bacteria;D_1__Firmicutes;D_2__Clostridia;D_3__Clostridiales;D_4__Ruminococcaceae;D_5__Subdoligranulum	0	0	0	0	0	0	0.0068816	0	0	0	0	0	0	0	0	0	0	0	0	0	0	0	0	0	0	0	0	0	0	0	0	0	0	0	0	0	0	0	0	0	0	0	0	0	0	0	0	0	0
D_0__Bacteria;D_1__Firmicutes;D_2__Clostridia;D_3__Clostridiales;D_4__Ruminococcaceae;D_5__UBA1819	0	0	0	0	0	0	0	0	0	0	0	0	0	0	0	0	0	0	0	0	0	0	0	0	0	0	0	0	0	0	0	0	0	0	0	0	0	0	0	0	0	0	0	0	0	0	0	0	0
D_0__Bacteria;D_1__Firmicutes;D_2__Clostridia;D_3__Clostridiales;D_4__Ruminococcaceae;D_5__[Eubacterium] coprostanoligenes group	0	0	0	0	0	0	0	0	0	0	0	0	0	0	0	0	0	0	0	0	0	0	0	0	0	0	0	0	0	0	0	0	0	0	0	0	0	0	0	0	0	0	0	0	0	0	0	0	0
D_0__Bacteria;D_1__Firmicutes;D_2__Clostridia;D_3__Clostridiales;D_4__Ruminococcaceae;D_5__uncultured	0	0	0	0	0	0	0	0	0	0	0	0	0	0	0	0	0	0	0	0	0	0	0	0	0	0	0	0	0	0	0	0	0	0	0	0	0	0	0	0	0	0	0	0	0	0	0	0	0
D_0__Bacteria;D_1__Firmicutes;D_2__Clostridia;D_3__Clostridiales;D_4__Ruminococcaceae;__	0.01343	0	0	0	0	0	0	0	0	0	0	0	0	0	0	0	0	0	0	0	0	0	0	0	0	0	0	0	0	0	0	0	0	0	0	0	0	0	0	0	0	0	0	0	0	0	0	0	0
D_0__Bacteria;D_1__Firmicutes;D_2__Clostridia;D_3__Clostridiales;__;__	0	0.0451977	0.0177219	0.0403063	0	0	0	0	0	0	0	0	0.0883343	0.00629386	0	0	0	0	0	0	0	0	0	0	0	0	0.12366	0	0	0.0534202	0	0	0	0	0.0184957	0	0	0	0	0	0	0	0.0357468	0.0841864	0	0	0	0	0.0498846
D_0__Bacteria;D_1__Firmicutes;D_2__Clostridia;D_3__DTU014;D_4__uncultured bacterium;D_5__uncultured bacterium	0	0	0	0	0	0	0	0	0	0	0	0	0	0	0	0	0	0	0	0	0	0	0	0	0	0	0	0	0	0	0	0	0	0	0	0	0	0	0	0	0	0	0	0	0	0	0	0	0
D_0__Bacteria;D_1__Firmicutes;D_2__Erysipelotrichia;D_3__Erysipelotrichales;D_4__Erysipelotrichaceae;D_5__Bulleidia	0.01343	0	0	0	0.0669165	0	0	0	0.162016	0	0	0	0	0	0	0	0	0	0	0	0.0489087	0	0	0	0	0	0.0294429	0.230415	0	0.117525	0	0	0	0	0	0	0	0	0	0	0	0.0182028	0	0	0	0	0.0160514	0	0.0280601
D_0__Bacteria;D_1__Firmicutes;D_2__Erysipelotrichia;D_3__Erysipelotrichales;D_4__Erysipelotrichaceae;D_5__Catenibacterium	0	0	0	0	0	0	0	0	0	0	0	0	0	0	0	0	0	0	0	0	0	0	0	0	0	0	0	0	0	0	0	0	0	0	0	0	0	0	0	0	0	0	0	0	0	0	0	0	0
D_0__Bacteria;D_1__Firmicutes;D_2__Erysipelotrichia;D_3__Erysipelotrichales;D_4__Erysipelotrichaceae;D_5__Coprobacillus	0	0	0	0	0	0	0	0	0	0	0	0	0	0	0	0	0	0	0	0	0	0	0	0	0	0	0	0	0	0	0	0	0	0	0	0	0	0	0	0	0	0	0	0	0	0	0	0	0
D_0__Bacteria;D_1__Firmicutes;D_2__Erysipelotrichia;D_3__Erysipelotrichales;D_4__Erysipelotrichaceae;D_5__Dielma	0	0	0	0	0	0	0	0	0	0	0	0	0	0	0	0	0	0	0	0	0	0	0	0	0	0	0	0	0	0	0	0	0	0	0	0	0	0	0	0	0	0	0	0	0	0	0	0	0
D_0__Bacteria;D_1__Firmicutes;D_2__Erysipelotrichia;D_3__Erysipelotrichales;D_4__Erysipelotrichaceae;D_5__Dubosiella	0	0	0	0	0	0	0	0	0	0	0	0	0	0	0	0	0	0	0	0	0	0	0	0	0	0	0	0	0	0	0	0	0	0	0	0	0	0	0	0	0	0	0	0	0	0	0	0	0
D_0__Bacteria;D_1__Firmicutes;D_2__Erysipelotrichia;D_3__Erysipelotrichales;D_4__Erysipelotrichaceae;D_5__Eggerthia	0	0	0.0354437	0	0.0334582	0	0	0	0	0	0	0	0	0	0	0	0	0	0	0	0	0	0	0	0	0	0	0.352399	0.0228016	0.168274	0	0	0	0	0	0	0	0	0.0436618	0	0	0	0	0.0471444	0	0	0	0	0
D_0__Bacteria;D_1__Firmicutes;D_2__Erysipelotrichia;D_3__Erysipelotrichales;D_4__Erysipelotrichaceae;D_5__Erysipelatoclostridium	0	0	0	0	0	0	0	0	0	0	0	0	0	0	0	0	0	0	0	0	0	0	0	0	0	0	0	0	0	0	0	0	0	0	0	0	0	0	0	0	0	0	0	0	0	0	0	0	0
D_0__Bacteria;D_1__Firmicutes;D_2__Erysipelotrichia;D_3__Erysipelotrichales;D_4__Erysipelotrichaceae;D_5__Erysipelothrix	0	0	0	0	0	0	0	0	0	0	0	0	0	0	0	0	0	0	0	0	0	0	0	0	0	0	0	0	0	0	0	0	0	0	0	0	0	0	0	0	0	0	0	0	0	0	0	0	0
D_0__Bacteria;D_1__Firmicutes;D_2__Erysipelotrichia;D_3__Erysipelotrichales;D_4__Erysipelotrichaceae;D_5__Erysipelotrichaceae UCG-003	0	0	0	0	0	0	0	0	0	0	0	0	0	0	0	0	0	0	0	0	0	0	0	0	0	0	0	0	0	0	0	0	0	0	0	0	0	0	0	0	0	0	0	0	0	0	0	0	0
D_0__Bacteria;D_1__Firmicutes;D_2__Erysipelotrichia;D_3__Erysipelotrichales;D_4__Erysipelotrichaceae;D_5__Erysipelotrichaceae UCG-006	0.0369326	0	0.0132914	0	0.0200749	0	0	0	0	0	0	0	0	0	0	0	0	0	0	0	0	0	0	0.0393457	0	0	0	0.0271076	0.00760052	0.0641043	0	0	0	0.0136196	0.0308261	0	0	0	0	0	0	0	0.00974912	0	0	0	0	0	0
D_0__Bacteria;D_1__Firmicutes;D_2__Erysipelotrichia;D_3__Erysipelotrichales;D_4__Erysipelotrichaceae;D_5__Faecalibaculum	0	0	0	0	0	0	0	0	0	0	0	0	0	0	0	0	0	0	0	0	0	0	0	0	0	0	0	0	0	0	0	0	0	0	0	0	0	0	0	0	0	0	0	0	0	0	0	0	0
D_0__Bacteria;D_1__Firmicutes;D_2__Erysipelotrichia;D_3__Erysipelotrichales;D_4__Erysipelotrichaceae;D_5__Faecalicoccus	0	0	0	0	0	0	0	0	0	0	0	0	0	0	0	0	0	0	0	0	0	0	0	0	0	0	0	0	0	0	0	0	0	0	0	0	0	0	0	0	0	0	0	0	0	0	0	0	0
D_0__Bacteria;D_1__Firmicutes;D_2__Erysipelotrichia;D_3__Erysipelotrichales;D_4__Erysipelotrichaceae;D_5__Faecalitalea	0	0	0	0	0	0	0	0	0	0	0	0	0	0	0	0	0	0	0	0	0	0	0	0	0	0	0	0	0	0	0	0	0	0	0	0	0	0	0	0	0	0	0	0	0	0	0	0	0
D_0__Bacteria;D_1__Firmicutes;D_2__Erysipelotrichia;D_3__Erysipelotrichales;D_4__Erysipelotrichaceae;D_5__Holdemanella	0	0	0	0	0	0	0	0	0	0	0	0	0	0	0	0	0	0	0	0	0	0	0	0	0	0	0	0	0	0	0	0	0	0	0	0	0	0	0	0	0	0	0	0	0	0	0	0	0
D_0__Bacteria;D_1__Firmicutes;D_2__Erysipelotrichia;D_3__Erysipelotrichales;D_4__Erysipelotrichaceae;D_5__Holdemania	0	0	0	0	0	0	0	0	0	0	0	0	0	0	0	0	0	0	0	0	0	0	0	0	0	0	0	0	0	0	0	0	0	0	0	0	0	0	0	0	0	0	0	0	0	0	0	0	0
D_0__Bacteria;D_1__Firmicutes;D_2__Erysipelotrichia;D_3__Erysipelotrichales;D_4__Erysipelotrichaceae;D_5__Merdibacter	0	0	0	0	0	0	0	0	0	0	0	0	0	0	0	0	0	0	0	0	0	0	0	0	0	0	0	0	0	0	0	0	0	0	0	0	0	0	0	0	0	0	0	0	0	0	0	0	0
D_0__Bacteria;D_1__Firmicutes;D_2__Erysipelotrichia;D_3__Erysipelotrichales;D_4__Erysipelotrichaceae;D_5__Solobacterium	1.55788	0.119451	1.24496	0.154508	0	0.16	0.805147	0.26329	0.708071	0.534249	0.488827	0.380491	0.287087	0.330428	0.852842	0.256747	0.191898	0.163944	0.314148	0.587969	0.140613	0.253758	0.306208	0.792536	0.832959	0.602841	1.61347	0.28463	0.516835	0.355245	0.68915	0.664989	1.06703	0.549326	1.22688	1.02781	0.603735	1.02962	0.0436618	0.577358	0.34134	0.115284	0.360718	0.0875539	0	0.548422	0.181915	1.33105	0.483257
D_0__Bacteria;D_1__Firmicutes;D_2__Erysipelotrichia;D_3__Erysipelotrichales;D_4__Erysipelotrichaceae;D_5__Turicibacter	0	0	0	0	0	0	0	0	0	0	0	0	0	0	0	0	0	0	0	0	0	0	0	0	0	0	0	0	0	0	0	0	0	0	0	0	0	0	0	0	0	0	0	0	0	0	0	0	0
D_0__Bacteria;D_1__Firmicutes;D_2__Erysipelotrichia;D_3__Erysipelotrichales;D_4__Erysipelotrichaceae;D_5__[Clostridium] innocuum group	0	0	0	0	0	0	0	0	0	0	0	0	0	0	0	0	0	0	0	0	0	0	0	0	0	0	0	0	0	0	0	0	0	0	0	0	0	0	0	0	0	0	0	0	0	0	0	0	0
D_0__Bacteria;D_1__Firmicutes;D_2__Erysipelotrichia;D_3__Erysipelotrichales;D_4__Erysipelotrichaceae;D_5__uncultured	0	0	0	0	0	0	0	0	0	0	0	0	0	0	0	0	0	0	0	0	0	0	0	0	0	0	0	0	0	0	0	0	0	0	0	0	0	0	0	0	0	0	0	0	0	0	0	0	0
D_0__Bacteria;D_1__Firmicutes;D_2__Erysipelotrichia;D_3__Erysipelotrichales;D_4__Erysipelotrichaceae;D_5__uncultured bacterium	0	0	0	0	0	0	0	0	0	0	0	0	0	0	0	0	0	0	0	0	0	0	0	0	0	0	0	0	0	0	0	0	0	0	0	0	0	0	0	0	0	0	0	0	0	0	0	0	0
D_0__Bacteria;D_1__Firmicutes;D_2__Erysipelotrichia;D_3__Erysipelotrichales;D_4__Erysipelotrichaceae;__	0	0	0	0	0	0	0	0	0	0	0	0	0	0	0	0	0	0	0	0	0	0	0	0	0	0	0	0	0	0	0	0	0	0	0	0	0	0	0	0	0	0	0	0	0	0	0	0	0
D_0__Bacteria;D_1__Firmicutes;D_2__Negativicutes;D_3__Selenomonadales;D_4__Acidaminococcaceae;D_5__Acidaminococcus	0	0	0	0	0	0	0	0	0	0	0	0	0	0	0	0	0	0	0	0	0	0	0	0	0	0	0	0	0	0	0	0	0	0	0	0	0	0	0	0	0	0	0	0	0	0	0	0	0
D_0__Bacteria;D_1__Firmicutes;D_2__Negativicutes;D_3__Selenomonadales;D_4__Acidaminococcaceae;D_5__Phascolarctobacterium	0	0	0	0	0	0	0	0	0	0	0	0	0	0	0	0	0	0	0	0	0	0	0	0	0	0	0	0	0	0	0	0	0	0	0	0	0	0	0	0	0	0	0	0	0	0	0	0	0
D_0__Bacteria;D_1__Firmicutes;D_2__Negativicutes;D_3__Selenomonadales;D_4__Veillonellaceae;D_5__Allisonella	0	0	0	0	0	0	0	0	0	0	0	0	0	0	0	0	0	0	0	0	0	0	0	0	0	0	0	0	0	0	0	0	0	0	0	0	0	0	0	0	0	0	0	0	0	0	0	0	0
D_0__Bacteria;D_1__Firmicutes;D_2__Negativicutes;D_3__Selenomonadales;D_4__Veillonellaceae;D_5__Anaeroglobus	0.130943	0.0290557	0.0620265	0	0.0736081	0	0	0.0626881	0.0780078	0	0	0	0	0.0125877	0	0	0	0	0	0	0	0	0.394358	0	0	0.0537185	0	0.169423	0	0	0	0	0	0	0.172626	0	0.014106	0	0.0921748	0	0.0249761	0	0	0.0404095	0.0369754	0	0.058855	0	0.0280601
D_0__Bacteria;D_1__Firmicutes;D_2__Negativicutes;D_3__Selenomonadales;D_4__Veillonellaceae;D_5__Centipeda	0.104083	0	0	0	0	0	0	0	0	0	0	0	0	0.0251754	0	0	0	0	0	0	0	0	0.0371161	0	0	0	0	0	0.0418028	0	0	0	0	0	0	0	0	0	0	0	0	0	0	0	0	0	0	0	0
D_0__Bacteria;D_1__Firmicutes;D_2__Negativicutes;D_3__Selenomonadales;D_4__Veillonellaceae;D_5__Dialister	1.61496	0.0871671	0.0132914	0.0604595	0.127141	0	0.0309672	0.0814945	0.39604	0.101762	0	0.0415081	0.0607299	0.047204	0	0.17687	0.0852878	0	0	0.0949796	0.0794767	0.572581	0.347963	0.505874	0.224657	0.0716247	0	1.15207	0.14821	0.430033	0	0	0.0474939	0	0.406905	0	0.073351	0.0487972	0.169796	0.0936257	0	0.133487	0.0877421	0.0606142	0.0308128	0.0535045	0.187266	0	0.152772
D_0__Bacteria;D_1__Firmicutes;D_2__Negativicutes;D_3__Selenomonadales;D_4__Veillonellaceae;D_5__Megamonas	0	0	0	0	0	0	0	0	0	0	0	0	0	0	0	0	0	0	0	0	0	0	0	0	0	0	0	0	0	0	0	0	0	0	0	0	0	0	0	0	0	0	0	0	0	0	0	0.0139743	0
D_0__Bacteria;D_1__Firmicutes;D_2__Negativicutes;D_3__Selenomonadales;D_4__Veillonellaceae;D_5__Megasphaera	2.53156	0.526231	0.655709	0.181378	0.44834	0.832	0.553969	0.702106	0.720072	1.54551	0.361859	0.152196	0.0662508	0.371338	0.389216	1.3522	0.547264	0.503542	1.05464	1.43826	0.0855903	0	1.96251	0.163004	1.78689	3.33652	0.712519	0.515045	0.456031	0.65974	0.809002	0.760844	1.63062	0.730921	2.39211	2.44105	2.29927	3.33285	0.480279	3.04283	0.903301	0.030338	1.73209	0	0.295803	3.01632	0.35848	0.911822	0.689032
D_0__Bacteria;D_1__Firmicutes;D_2__Negativicutes;D_3__Selenomonadales;D_4__Veillonellaceae;D_5__Mitsuokella	0	0	0	0	0	0	0	0	0	0	0	0	0	0	0	0	0	0	0	0	0	0	0	0	0	0	0	0	0	0	0	0	0	0	0	0	0	0	0	0	0	0	0	0	0	0	0	0	0
D_0__Bacteria;D_1__Firmicutes;D_2__Negativicutes;D_3__Selenomonadales;D_4__Veillonellaceae;D_5__Negativicoccus	0	0	0	0	0	0	0	0	0	0	0	0	0	0	0	0	0	0	0	0	0	0	0	0	0	0	0	0	0	0	0	0	0	0	0	0	0	0	0	0	0	0	0	0	0	0	0	0	0
D_0__Bacteria;D_1__Firmicutes;D_2__Negativicutes;D_3__Selenomonadales;D_4__Veillonellaceae;D_5__Selenomonas	1.54445	0.135593	0.00443046	0	0	0.088	0.615903	0	0.0360036	0.432487	0.171407	0	0	0.0188816	0.177437	0.399384	0.021322	0.761169	0	0.773406	0.0978174	0.357863	0.505707	0.438424	0.0691252	1.44443	0.0706631	0.65736	0.163411	0.333876	0.0998768	0.425353	0.842225	0.585645	0.949445	0.158706	0.0451391	0.85883	0.140688	0.967465	0.0374641	0.0364056	1.00741	0.0269397	0	0.20733	0.139112	0.024455	1.33753
D_0__Bacteria;D_1__Firmicutes;D_2__Negativicutes;D_3__Selenomonadales;D_4__Veillonellaceae;D_5__Selenomonas 3	1.66197	0.116223	0.119623	0.456805	0	0.288	1.62062	0	0.366037	1.1321	1.41569	0	0.226357	0.859112	0.715471	2.19661	0.248756	7.05545	0.673174	2.02623	0	0.32533	0.742322	0.331628	1.32029	9.24555	0.683076	0.806452	0.456031	0.603649	0.139828	2.51618	1.09869	3.25964	3.02096	0.990024	1.50934	0.731957	0.955708	1.27175	0.691004	0	2.23905	0.973195	0.326616	0.214018	0.155163	0.366825	2.02656
D_0__Bacteria;D_1__Firmicutes;D_2__Negativicutes;D_3__Selenomonadales;D_4__Veillonellaceae;D_5__Selenomonas 4	0.268601	0.0355125	0.0310132	0.0537418	0	0	0.0309672	0	0.0360036	0	0	0	0.0220836	0.0346162	0	0.0798768	0.0355366	0	0.0841468	0	0	0.110612	0.0695927	0.123658	0.0276501	0.0537185	0.0588859	0.162646	0	0.0934854	0	0	0.00949878	0.0363191	0.104809	0	0.0253907	0	0.126134	0.0234064	0	0	0	0.0639817	0	0	0.0642055	0	0.0966515
D_0__Bacteria;D_1__Firmicutes;D_2__Negativicutes;D_3__Selenomonadales;D_4__Veillonellaceae;D_5__Veillonella	3.91821	5.23002	4.56781	1.88768	3.47966	5.992	4.14961	6.25627	5.62856	6.30923	5.75165	4.71117	4.32838	5.90679	5.45475	6.58983	5.8209	4.60214	8.91956	5.51334	3.49697	5.24432	12.1926	2.13591	7.11644	11.8419	5.76493	4.58119	4.13468	3.2987	4.39791	6.36832	5.77526	3.56835	5.10481	5.34311	6.21509	6.16308	7.91248	5.68776	9.82808	5.15745	5.67074	2.42794	5.81746	5.91225	4.73515	7.13038	3.56052
D_0__Bacteria;D_1__Firmicutes;D_2__Negativicutes;D_3__Selenomonadales;D_4__Veillonellaceae;D_5__uncultured	0.231668	0	0	0	0.0736081	0	0	0	0	0.0890415	0	0	0	0	0	0	0	0	0	0	0.0855903	0	0.352603	0	0.00691252	0.381998	0	0.135538	0.0228016	0.120196	0.00665845	0.0239636	0	0	0.0863132	0	0	0	0.232863	0.101428	0.0291387	0	0.133238	0.0134698	0.351266	0	0.0909577	0	0
D_0__Bacteria;D_1__Firmicutes;D_2__Negativicutes;D_3__Selenomonadales;D_4__Veillonellaceae;__	0.0369326	0	0.243676	0	0	0	0.0722568	0	0.0660066	0.407047	0	0	0.0165627	0.0755263	0.074409	0	0.241649	0.0351309	0.420734	0.370873	0	0.331837	0.0371161	0.0449666	0.100232	0.28053	0	0.433722	0.0114008	0.176287	0.0532676	0.509226	0.0886553	0.181595	0.456227	0.0226723	0.270835	0.566047	0	2.09878	0	0	0.116989	0	0	0	0.058855	0	0.15589
D_0__Bacteria;D_1__Firmicutes;__;__;__;__	0.308891	0.196933	0.066457	0.335886	0.535332	0	0.144514	1.55466	0.162016	0.661451	0	0.823245	0.342296	0	0.39494	0.650425	0.0995025	0.480122	0.0897565	0.755314	0.862016	0.553061	0.56602	0	0.362907	0.274561	0.317984	0	0.285019	0.328534	0.206412	0.359454	0.00949878	0.00907977	0.363748	0.521463	0.197483	0.0780754	0	0	0	0.182028	0.506954	0.0101024	0	0.581862	0.34778	0.356344	0.174596
D_0__Bacteria;D_1__Fusobacteria;D_2__Fusobacteriia;D_3__Fusobacteriales;D_4__Fusobacteriaceae;D_5__Fusobacterium	1.17177	2.47619	3.30513	1.74661	1.93389	0.872	1.77201	4.65772	2.48425	0.871335	2.24733	2.96091	3.79838	0.928344	2.31813	4.41034	2.11798	1.21201	2.5805	2.53731	3.40527	6.27237	1.34082	1.73683	1.04725	0.441686	2.42021	4.21523	3.07441	5.06424	1.72787	3.26504	1.41215	4.34467	2.21948	6.09885	1.05795	2.49353	1.79013	1.62284	0.46622	1.38948	2.7525	1.9868	1.15856	3.05645	3.25843	2.12409	3.97518
D_0__Bacteria;D_1__Fusobacteria;D_2__Fusobacteriia;D_3__Fusobacteriales;D_4__Leptotrichiaceae;D_5__Leptotrichia	3.66976	4.46489	2.10447	9.18984	2.90418	3.992	4.12552	1.21615	2.80228	1.65363	3.78999	1.27292	2.51201	4.56305	1.35081	1.30656	3.51102	1.55161	1.61562	3.75848	2.51269	4.42449	1.5032	0.657636	5.44707	3.52155	2.10811	3.86961	2.9186	6.68821	4.42121	2.37838	7.96631	4.5308	2.63255	3.20435	7.20533	4.67965	3.24552	8.89444	1.0823	1.59578	6.15495	4.64709	4.25217	6.30685	4.0717	2.6062	5.58084
D_0__Bacteria;D_1__Fusobacteria;D_2__Fusobacteriia;D_3__Fusobacteriales;D_4__Leptotrichiaceae;D_5__Oceanivirga	0	0	0	0	0	0	0	0	0	0	0	0	0	0	0	0	0	0	0	0	0	0	0	0	0	0	0.0117772	0	0	0	0	0	0	0	0	0	0	0	0	0	0	0	0	0	0	0	0	0	0
D_0__Bacteria;D_1__Fusobacteria;D_2__Fusobacteriia;D_3__Fusobacteriales;D_4__Leptotrichiaceae;D_5__Sneathia	0	0	0	0	0	0	0	0	0	0	0	0	0	0	0	0	0	0	0	0	0	0	0	0	0	0	0	0	0	0	0	0	0	0	0	0	0	0	0.0291078	0	0	0	0	0	0	0	0	0	0
D_0__Bacteria;D_1__Fusobacteria;D_2__Fusobacteriia;D_3__Fusobacteriales;D_4__Leptotrichiaceae;D_5__Streptobacillus	0	0	0.150636	0	0	0	0	0.545386	0	0	0.615795	0	0.226357	0	0.0515139	0	0	0	0	0	0	0	0	0.0393457	0	0	0.0942174	0.271076	0	0	0	0	0	0	0	0	0	0	0	0	0	0	0	0	0	0	0	0	0.162125
D_0__Bacteria;D_1__Fusobacteria;D_2__Fusobacteriia;D_3__Fusobacteriales;D_4__Leptotrichiaceae;D_5__uncultured	0	0	0	0	0	0	0	0	0	0	0.190452	0	0	0	0	0	0	0	0	0	0	0	0	0	0	0	0	0	0	0	0	0	0	0	0	0	0	0	0	0	0	0	0	0	0	0	0	0	0
D_0__Bacteria;D_1__Fusobacteria;D_2__Fusobacteriia;D_3__Fusobacteriales;D_4__Leptotrichiaceae;__	0	0	0	0	0	0	0	0	0	0	0	0	0	0	0	0	0	0	0	0	0	0	0	0	0	0	0	0.833559	0	0	0	0	0	0	0	0	0	0	0	0	0	0	0	0	0	0	0	0	0
D_0__Bacteria;D_1__Fusobacteria;D_2__Fusobacteriia;D_3__Fusobacteriales;__;__	0.543916	0	0	0.483676	0.501874	0	0.0619344	0	0.40204	0	0.253936	0	0	0	0.217503	0	0	0	0	0	0	0	0.47323	0.646394	0	0	0	1.11819	0.0722049	0.825343	0	0	0	0	0	0	0	0	0.198904	0.132636	0	0	0	0.134698	0	0.407972	0.192616	0	0.274366
D_0__Bacteria;D_1__Gemmatimonadetes;D_2__Gemmatimonadetes;D_3__Gemmatimonadales;D_4__Gemmatimonadaceae;D_5__Gemmatimonas	0	0	0	0	0	0	0	0	0	0	0	0	0	0	0	0	0	0	0	0	0	0	0	0	0	0.0179062	0	0	0	0	0	0	0	0	0	0	0	0	0	0	0	0	0	0	0	0	0	0	0
D_0__Bacteria;D_1__Gemmatimonadetes;D_2__Gemmatimonadetes;D_3__Gemmatimonadales;D_4__Gemmatimonadaceae;D_5__Gemmatirosa	0	0	0	0	0	0	0	0	0	0	0	0	0	0	0	0	0	0	0	0	0	0	0	0	0	0	0	0	0	0	0	0	0	0	0	0	0	0	0	0	0	0	0	0	0	0	0	0	0
D_0__Bacteria;D_1__Gemmatimonadetes;D_2__Gemmatimonadetes;D_3__Gemmatimonadales;D_4__Gemmatimonadaceae;__	0	0	0	0	0	0	0	0	0	0	0	0	0	0	0	0	0	0	0	0	0	0	0	0	0	0.0537185	0	0	0	0	0	0	0	0	0	0	0	0	0	0	0	0	0	0	0	0	0	0	0
D_0__Bacteria;D_1__Lentisphaerae;D_2__Lentisphaeria;D_3__Victivallales;D_4__Victivallaceae;D_5__Victivallis	0	0	0	0	0	0	0	0	0	0	0	0	0	0	0	0	0	0	0	0	0	0	0	0	0	0	0	0	0	0	0	0	0	0	0	0	0	0	0	0	0	0	0	0	0	0	0	0	0
D_0__Bacteria;D_1__Lentisphaerae;D_2__Lentisphaeria;D_3__Victivallales;D_4__Victivallaceae;D_5__uncultured organism	0	0	0	0	0	0	0	0	0	0	0	0	0	0	0	0	0	0	0	0	0	0	0	0	0	0	0	0	0	0	0	0	0	0	0	0	0	0	0	0	0	0	0	0	0	0	0	0	0
D_0__Bacteria;D_1__Lentisphaerae;D_2__Lentisphaeria;D_3__Victivallales;D_4__Victivallaceae;__	0	0	0	0	0	0	0	0	0	0	0	0	0	0	0	0	0	0	0	0	0	0	0	0	0	0	0	0	0	0	0	0	0	0	0	0	0	0	0	0	0	0	0	0	0	0	0	0	0
D_0__Bacteria;D_1__Lentisphaerae;D_2__Lentisphaeria;D_3__Victivallales;D_4__vadinBE97;D_5__Bacteroidales bacterium 55_9	0	0	0	0	0	0	0	0	0	0	0	0	0	0	0	0	0	0	0	0	0	0	0	0	0	0	0	0	0	0	0	0	0	0	0	0	0	0	0	0	0	0	0	0	0	0	0	0	0
D_0__Bacteria;D_1__Lentisphaerae;D_2__Lentisphaeria;D_3__Victivallales;D_4__vadinBE97;D_5__uncultured rumen bacterium	0	0	0	0	0	0	0	0	0	0	0	0	0	0	0	0	0	0	0	0	0	0	0	0	0	0	0	0	0	0	0	0	0	0	0	0	0	0	0	0	0	0	0	0	0	0	0	0	0
D_0__Bacteria;D_1__Nitrospirae;D_2__Nitrospira;D_3__Nitrospirales;D_4__Nitrospiraceae;D_5__Nitrospira	0	0	0	0	0	0	0	0	0	0	0	0	0	0	0	0	0	0	0	0	0	0	0	0	0	0	0	0	0	0	0	0	0	0	0	0	0	0	0	0	0	0	0	0	0	0	0	0	0
D_0__Bacteria;D_1__Patescibacteria;D_2__Gracilibacteria;D_3__Absconditabacteriales (SR1);D_4__SR1 bacterium human oral taxon HOT-345;D_5__SR1 bacterium human oral taxon HOT-345	0	0	0	0	0	0	0	0	0	0	0	0	0	0	0	0	0	0	0	0	0	0	0	0	0	0	0	0	0	0	0	0	0	0	0	0	0	0.068316	0	0	0	0	0.0422462	0	0	0	0	0	0
D_0__Bacteria;D_1__Patescibacteria;D_2__Gracilibacteria;D_3__Absconditabacteriales (SR1);D_4__SR1 bacterium oral taxon 875;D_5__SR1 bacterium oral taxon 875	0	0	0.558238	0	0	0	1.11826	0.194333	0	0	0.133316	0	0.259482	0	0	0.479261	0	0.181509	0	0	0	0	0	2.29329	0	0	0.977506	0	1.12488	0.0160261	0	0	0.41478	0.40405	0.0924784	0	0	1.44928	0	0	0	0	0	0	0	0	0	0	0
D_0__Bacteria;D_1__Patescibacteria;D_2__Gracilibacteria;D_3__Absconditabacteriales (SR1);D_4__candidate division SR1 bacterium MGEHA;D_5__candidate division SR1 bacterium MGEHA	0	0.200161	0.0797483	0	0	0	0.0653752	0	0	0	0	0	0	0	0	0	0	0	0	0.0723654	0	0	0	0	0.0276501	0	0.0824402	0	0.0798054	0.189642	0	0	0.0569927	0.217914	0	0.211608	0.0620662	0	0.0388105	0	0	0	0	0.21215	0.117089	0	0	0	0.15589
D_0__Bacteria;D_1__Patescibacteria;D_2__Gracilibacteria;D_3__Absconditabacteriales (SR1);D_4__candidate division SR1 bacterium taxon 345;D_5__candidate division SR1 bacterium taxon 345	0	0	0	0	0	0	0	0	0	0	0	0	0.220836	0	0	0	0	0	0	0	0	0	0	0.286662	0	0	0.100106	0.142315	0	0.208339	0	0	0	0	0	1.80623	0	0	0	0	0	0	0	0	0	0	0	0	0
D_0__Bacteria;D_1__Patescibacteria;D_2__Gracilibacteria;D_3__Absconditabacteriales (SR1);__;__	0	0.0387409	1.66585	0	0	0	0.536765	0	0.0240024	0	0.063484	0.145278	0.623861	0	0	0	0	0	0	0	0.0794767	0	0	0	0	0	0	0	0.269818	0	0.0166461	0.119818	0	0	0	0	0	0	0	0	0	0	0	0	0	0	0	0	0
D_0__Bacteria;D_1__Patescibacteria;D_2__Gracilibacteria;D_3__Gracilibacteria bacterium oral taxon 873;D_4__Gracilibacteria bacterium oral taxon 873;D_5__Gracilibacteria bacterium oral taxon 873	0	0.14205	0.119623	0	0	0	0.0825792	0	0	0	0	0	0.0276045	0	0	0	0	0	0	0.0135685	0	0	0	0	0	0	0.0412201	0	0.159611	0.00801303	0	0	0	0	0	0	0	0	0	0	0	0	0	0.037042	0	0	0	0	0.102887
D_0__Bacteria;D_1__Patescibacteria;D_2__Gracilibacteria;D_3__JGI 0000069-P22;D_4__Gracilibacteria bacterium oral taxon 871;D_5__Gracilibacteria bacterium oral taxon 871	0	0	0	0	0	0	0.0206448	0	0	0.0254404	0.0190452	0	0	0	0	0	0.0142146	0	0	0	0	0	0	0	0	0	0	0	0	0	0	0	0	0.0181595	0	0	0	0	0	0	0	0	0.00649942	0	0	0	0.0695559	0	0.0872981
D_0__Bacteria;D_1__Patescibacteria;D_2__Gracilibacteria;D_3__JGI 0000069-P22;D_4__Gracilibacteria bacterium oral taxon 872;D_5__Gracilibacteria bacterium oral taxon 872	0	0.0484262	0.0310132	0	0	0.056	0	0	0	0	0	0	0.0331254	0	0	0	0	0	0	0	0	0	0	0	0	0	0.0471087	0	0	0.0160261	0.0233046	0	0.0158313	0	0	0	0	0	0	0	0	0	0	0.0976562	0	0	0	0	0.0405313
D_0__Bacteria;D_1__Patescibacteria;D_2__Saccharimonadia;D_3__Saccharimonadales;D_4__Candidatus Saccharibacteria bacterium UB2523;D_5__Candidatus Saccharibacteria bacterium UB2523	0.345823	0.135593	0	0.0403063	0	0	0	0	0.180018	0.0190803	0.0253936	0	0	0.182522	0	0	0.149254	0.0234206	0	0	0.0550223	0	0.487149	0.0337249	0.0207376	0	0	0.508268	0.0342023	0.197655	0	0	0	0	0.0924784	0	0	0.0439174	0.0242565	0	0	0	0.0162485	0.309806	0	0	0.203317	0	0.0218245
D_0__Bacteria;D_1__Patescibacteria;D_2__Saccharimonadia;D_3__Saccharimonadales;D_4__Saccharimonadaceae;D_5__Candidatus Saccharibacteria oral taxon TM7x	0	0.0839387	0	0.0604595	0	0.032	0.0412896	0	0	0	0.0825292	0	0.0772926	0	0	0	0	0	0	0	0	0	0.0695927	0	0	0	0	0	0	0	0.073243	0	0	0	0.080148	0	0.0338543	0	0.0291078	0	0	0	0	0.22562	0.0369754	0.0200642	0	0	0.305543
D_0__Bacteria;D_1__Patescibacteria;D_2__Saccharimonadia;D_3__Saccharimonadales;D_4__Saccharimonadaceae;D_5__Candidatus Saccharimonas	1.51424	0.255044	1.5418	0.523982	0.361349	0	1.046	1.82422	0.60006	1.22114	0.685627	0.59495	0.220836	0.805614	3.21676	1.9741	1.52807	0.567949	1.76708	1.61465	1.68735	1.24276	0.0695927	2.69237	1.18895	0.286499	2.6852	0.691244	0.535836	0.758567	0.838965	2.68991	2.47602	1.31657	3.35388	0.740629	0.654517	3.00102	0.189201	0.522743	0.40378	0.254839	2.8305	0.0538793	0.0308128	0.82932	0.481541	0.565959	0.215128
D_0__Bacteria;D_1__Patescibacteria;D_2__Saccharimonadia;D_3__Saccharimonadales;D_4__Saccharimonadaceae;D_5__TM7 bacterium human oral taxon HOT-869	0	0	0	0	0	0	0	0	0	0	0.0253936	0	0	0	0	0	0	0	0	0	0	0	0	0	0	0	0	0	0	0	0	0	0	0	0	0	0	0	0	0	0	0	0	0	0	0	0	0.024455	0
D_0__Bacteria;D_1__Patescibacteria;D_2__Saccharimonadia;D_3__Saccharimonadales;D_4__Saccharimonadaceae;D_5__TM7 phylum sp. canine oral taxon 237	0	0	0	0	0	0	0	0	0	0	0	0	0.0828134	0	0	0.0399384	0	0	0	0	0	0	0	0	0	0	0	0	0.0304021	0	0	0	0	0	0	0	0	0	0	0	0	0	0.0162485	0.111126	0	0	0	0.00698714	0
D_0__Bacteria;D_1__Patescibacteria;D_2__Saccharimonadia;D_3__Saccharimonadales;D_4__Saccharimonadaceae;D_5__TM7 phylum sp. oral clone DR034	2.04136	0.238902	0.416464	1.52492	0.562099	0.608	3.24812	2.40095	1.75818	4.10863	1.21889	0.311311	2.25805	0	1.44239	2.15097	2.45913	0.731893	0.77976	5.0294	0.409611	0.800312	0.765519	0.876848	2.02537	0.483467	0.606525	0.813229	1.71012	4.1828	5.31012	3.06734	2.51084	1.5027	2.48459	1.64752	2.54189	2.27883	0.596711	0.733401	0.63689	0.449002	2.10906	0	0.67172	2.16025	0.34778	0.754612	0.402195
D_0__Bacteria;D_1__Patescibacteria;D_2__Saccharimonadia;D_3__Saccharimonadales;D_4__Saccharimonadaceae;D_5__TM7 phylum sp. oral clone HD027	0	0.00645682	0	0	0	0	0	0	0	0	0	0	0	0	0	0	0	0	0	0	0	0	0	0	0	0	0	0	0	0.0186971	0	0	0	0	0.0924784	0	0	0	0	0	0	0	0	0	0	0	0	0	0
D_0__Bacteria;D_1__Patescibacteria;D_2__Saccharimonadia;D_3__Saccharimonadales;D_4__Saccharimonadaceae;D_5__candidate division TM7 single-cell isolate TM7a	0.0268601	0.0903955	0.265828	0	0	0.072	0.120428	0	0	0.222604	0.114271	0.0276721	0.242919	0	0.412111	0.0798768	0	0	0.330977	0.144731	0	0	0.0742322	0	0.207376	0.0895309	0.359204	0.365953	0.0988067	0.117525	0	0	0.0221638	0.0635584	0	0	0.124132	0.600205	0.063067	0.0390107	0	0.127419	0.139737	0.525323	0	0.0802568	0	0	0.991457
D_0__Bacteria;D_1__Patescibacteria;D_2__Saccharimonadia;D_3__Saccharimonadales;D_4__Saccharimonadaceae;D_5__uncultured Candidatus Saccharibacteria bacterium	0	0	0	0	0	0	0	0	0	0	0	0	0	0	0	0	0	0	0	0	0	0	0	0	0	0	0	0	0	0	0	0	0.0253301	0	0	0	0	0	0	0	0	0	0	0	0	0	0	0	0
D_0__Bacteria;D_1__Patescibacteria;D_2__Saccharimonadia;D_3__Saccharimonadales;D_4__Saccharimonadaceae;D_5__uncultured bacterium	0	0.0903955	0.0354437	0	0.0535332	0.064	0	0	0	0	0	0	0.132502	0.088114	0	0.0969932	0.0426439	0	0.112196	0	0	0.507515	0	0.0224833	0	0	0	0.1762	0.0722049	0.0293811	0	0.0479272	0	0.167976	0.197287	0.113362	0.0253907	0	0	0	0	0.121352	0	0.0942888	0	0.0267523	0.0428036	0	0.0498846
D_0__Bacteria;D_1__Patescibacteria;D_2__Saccharimonadia;D_3__Saccharimonadales;D_4__Saccharimonadaceae;D_5__uncultured bacterium oral clone BE109	0	0	0	0	0.0736081	0	0	0	0	0	0	0	0	0	0	0	0	0	0	0	0	0	0	0.0337249	0.0587564	0	0	0	0.0266018	0	0.0199754	0	0.012665	0	0	0	0	0	0.0776209	0	0	0	0	0.0235722	0.0924385	0	0	0	0
D_0__Bacteria;D_1__Patescibacteria;D_2__Saccharimonadia;D_3__Saccharimonadales;D_4__Saccharimonadaceae;D_5__uncultured bacterium oral clone BS003	0.18802	0	0	0	0	0	0	0	0	0	0	0	0	0	0	0	0	0	0.0280489	0	0.0550223	0	0	0.112416	0	0.065656	0	0	0	0.0961564	0	0	0	0.0680982	0	0	0	0	0.208606	0	0	0	0	1.19545	0	0	0	0	0.106005
D_0__Bacteria;D_1__Patescibacteria;D_2__Saccharimonadia;D_3__Saccharimonadales;D_4__Saccharimonadaceae;__	0.17459	0.0355125	0.239245	0.181378	0	0.024	0.0722568	0.0438816	0.0960096	0	0.0444388	0	0.132502	0.377632	0	0.148343	0	0	0.0729272	0.0226142	0.0427951	0	0.157743	0.213591	0.0380189	0.179062	0.12366	0	0	0.467427	0	0	0.0158313	0.0317792	0.12947	0	0.0394967	0.219587	0.0388105	0.0312086	0	0.0910139	0.0584947	0.235722	0.0493005	0	0.34778	0	0.218245
D_0__Bacteria;D_1__Patescibacteria;D_2__Saccharimonadia;D_3__Saccharimonadales;D_4__TM7 phylum sp. oral clone FR058;D_5__TM7 phylum sp. oral clone FR058	0.302176	0.723164	0.584821	0.322451	0.381424	0	0.423219	0.231946	0.210021	0.744133	0.907821	0	0.237399	0.220285	0.400664	0	0.454869	0.351309	0	0.375396	0	0	0.176301	0.75319	0.667058	0.101468	0.54175	0.257522	1.12868	0.352574	0	0.461299	1.07336	0.499387	0.27127	0.29474	1.00434	0.995462	0.51909	0	0	0.285177	0.10724	0.616245	0.345104	0.214018	0.331728	0.0384293	0.467669
D_0__Bacteria;D_1__Patescibacteria;D_2__Saccharimonadia;D_3__Saccharimonadales;__;__	0.0268601	0.0355125	0	0	0	0	0	0	0	0	0	0	0.0496881	0.0534978	0	0	0.021322	0.040986	0	0	0	0	0	0	0	0	0	0.0203307	0	0	0	0.0898634	0	0.0408589	0.0123305	0	0	0.0487972	0	0	0	0	0	0.0740841	0	0	0	0	0.0685914
D_0__Bacteria;D_1__Proteobacteria;D_2__Alphaproteobacteria;D_3__Acetobacterales;D_4__Acetobacteraceae;D_5__Craurococcus	0	0	0	0	0	0	0	0	0	0	0	0	0	0	0	0	0	0	0	0	0	0	0	0	0	0	0	0	0	0	0	0	0	0	0	0	0	0	0	0	0	0	0	0	0	0	0	0	0
D_0__Bacteria;D_1__Proteobacteria;D_2__Alphaproteobacteria;D_3__Acetobacterales;D_4__Acetobacteraceae;D_5__Rhodovarius	0	0	0	0	0	0	0	0	0	0	0	0	0	0	0	0	0	0	0	0	0	0	0	0	0	0	0	0	0	0	0	0	0	0	0	0	0	0	0	0	0	0	0	0	0	0	0	0	0
D_0__Bacteria;D_1__Proteobacteria;D_2__Alphaproteobacteria;D_3__Caulobacterales;D_4__Caulobacteraceae;D_5__Brevundimonas	0	0	0	0	0	0	0	0	0	0	0	0	0	0	0	0	0	0	0	0	0	0	0	0	0	0	0	0	0	0	0	0	0	0	0	0	0	0	0	0	0	0	0	0	0	0	0	0	0
D_0__Bacteria;D_1__Proteobacteria;D_2__Alphaproteobacteria;D_3__Caulobacterales;D_4__Hyphomonadaceae;D_5__UKL13-1	0	0	0	0	0	0	0	0	0	0	0	0	0	0	0	0	0	0	0	0	0	0	0	0	0	0	0	0	0	0	0	0	0	0	0	0	0	0	0	0	0	0	0	0	0	0	0	0	0
D_0__Bacteria;D_1__Proteobacteria;D_2__Alphaproteobacteria;D_3__Caulobacterales;D_4__Parvularculaceae;D_5__Amphiplicatus	0	0	0	0	0	0	0	0	0	0	0	0	0	0	0	0	0	0	0	0	0	0	0	0	0	0	0	0	0	0	0	0	0	0	0	0	0	0	0	0	0	0	0	0	0	0	0	0	0
D_0__Bacteria;D_1__Proteobacteria;D_2__Alphaproteobacteria;D_3__Reyranellales;D_4__Reyranellaceae;D_5__Reyranella	0	0	0	0	0	0	0	0	0	0	0	0	0	0	0	0	0	0	0	0	0	0	0	0	0	0	0	0	0	0	0	0	0	0	0	0	0	0	0	0	0	0	0	0	0	0	0	0	0
D_0__Bacteria;D_1__Proteobacteria;D_2__Alphaproteobacteria;D_3__Rhizobiales;D_4__Beijerinckiaceae;D_5__1174-901-12	0	0	0	0	0	0	0	0	0	0	0	0	0	0	0	0	0	0	0	0	0	0	0	0	0	0	0	0	0	0	0	0	0	0	0	0	0	0	0	0	0	0	0	0	0	0	0	0	0
D_0__Bacteria;D_1__Proteobacteria;D_2__Alphaproteobacteria;D_3__Rhizobiales;D_4__Beijerinckiaceae;D_5__Methylobacterium	0	0	0	0	0	0	0	0	0	0	0	0	0	0	0	0	0	0	0	0	0	0	0	0	0	0	0	0	0	0	0	0	0	0	0	0	0	0	0	0	0	0	0	0	0	0	0	0	0
D_0__Bacteria;D_1__Proteobacteria;D_2__Alphaproteobacteria;D_3__Rhizobiales;D_4__Devosiaceae;D_5__Devosia	0	0	0	0	0	0	0	0	0	0	0	0	0	0	0	0	0	0	0	0	0	0	0	0	0	0	0	0	0	0	0	0	0	0	0	0	0	0	0	0	0	0	0	0	0	0	0	0	0
D_0__Bacteria;D_1__Proteobacteria;D_2__Alphaproteobacteria;D_3__Rhizobiales;D_4__Hyphomicrobiaceae;D_5__Pedomicrobium	0	0	0	0	0	0	0	0	0	0	0	0	0	0	0	0	0	0	0	0	0	0	0	0	0	0	0	0	0	0	0	0	0	0	0	0	0	0	0	0	0	0	0	0	0	0	0	0	0
D_0__Bacteria;D_1__Proteobacteria;D_2__Alphaproteobacteria;D_3__Rhizobiales;D_4__Labraceae;D_5__Labrys	0	0	0	0	0	0	0	0	0	0	0	0	0	0	0	0	0	0	0	0	0	0	0	0	0	0	0	0	0	0	0	0	0	0	0	0	0	0	0	0	0	0	0	0	0	0	0	0	0
D_0__Bacteria;D_1__Proteobacteria;D_2__Alphaproteobacteria;D_3__Rhizobiales;D_4__Pleomorphomonadaceae;D_5__Chthonobacter	0	0	0	0	0	0	0	0	0	0	0	0	0	0	0	0	0	0	0	0	0	0	0	0	0	0	0	0	0	0	0	0	0	0	0	0	0	0	0	0	0	0	0	0	0	0	0	0	0
D_0__Bacteria;D_1__Proteobacteria;D_2__Alphaproteobacteria;D_3__Rhizobiales;D_4__Rhizobiaceae;D_5__Allorhizobium-Neorhizobium-Pararhizobium-Rhizobium	0	0	0	0	0	0.064	0	0	0	0	0	0	0	0	0	0	0	0	0	0	0	0	0	0	0	0	0	0	0	0	0	0	0	0	0	0	0	0	0	0	0	0	0	0	0	0	0	0	0
D_0__Bacteria;D_1__Proteobacteria;D_2__Alphaproteobacteria;D_3__Rhizobiales;D_4__Rhizobiaceae;D_5__Ochrobactrum	0	0	0	0	0	0	0	0	0	0	0	0	0	0	0	0	0	0	0	0	0	0	0	0	0	0	0	0	0	0	0	0	0	0	0	0	0	0	0	0	0	0	0	0	0	0	0	0	0
D_0__Bacteria;D_1__Proteobacteria;D_2__Alphaproteobacteria;D_3__Rhizobiales;D_4__Rhizobiaceae;D_5__Phyllobacterium	0	0	0	0.29558	0	0.44	0	0	0	0	0.0571356	0	0	0	0.125923	0.136932	0	0	0	0	0.171181	0	0	0	0	0.399905	0	0	0	0	0	0.149772	0.0221638	0.0408589	0	0	0.0366755	0	0.0824722	0	0	0	0.0194982	0	0	0	0	0	0
D_0__Bacteria;D_1__Proteobacteria;D_2__Alphaproteobacteria;D_3__Rhizobiales;D_4__Rhizobiaceae;D_5__Shinella	0	0	0	0	0	0	0	0	0	0	0	0	0	0	0	0	0	0	0	0	0	0	0	0	0	0	0	0	0	0	0	0	0	0	0	0	0	0	0	0	0	0	0	0	0	0	0	0	0
D_0__Bacteria;D_1__Proteobacteria;D_2__Alphaproteobacteria;D_3__Rhizobiales;D_4__Rhizobiaceae;__	0	0	0.0265828	0	0	0.832	0	0	0.0240024	0.0190803	0	0	0.12146	0	0	0	0	0.251771	0.0729272	0.0407056	0	0.065066	0.00927902	0.061829	0	0.405873	0.211989	0	0	0.0293811	0	0	0	0	0.0431566	0	0	0.102474	0.174647	0	0	0.0485407	0	0	0	0	0.0428036	0.0139743	0
D_0__Bacteria;D_1__Proteobacteria;D_2__Alphaproteobacteria;D_3__Rhizobiales;D_4__Rhizobiales Incertae Sedis;D_5__uncultured	0	0	0	0	0	0	0	0	0	0	0	0	0	0	0	0	0	0	0	0	0	0	0	0	0	0	0	0	0	0	0	0	0	0	0	0	0	0	0	0	0	0	0	0	0	0	0	0	0
D_0__Bacteria;D_1__Proteobacteria;D_2__Alphaproteobacteria;D_3__Rhizobiales;D_4__Xanthobacteraceae;D_5__Bradyrhizobium	0	0	0	0	0	0	0	0	0	0	0	0	0	0	0	0	0	0	0	0	0	0	0	0	0	0	0	0	0	0	0	0	0	0	0	0	0	0	0	0	0	0	0	0	0	0	0	0	0
D_0__Bacteria;D_1__Proteobacteria;D_2__Alphaproteobacteria;D_3__Rhizobiales;D_4__Xanthobacteraceae;D_5__Xanthobacter	0	0	0	0	0	0	0	0	0	0	0	0	0	0	0	0	0	0	0	0	0	0	0	0	0	0	0	0	0	0	0	0	0	0	0	0	0	0	0	0	0	0	0	0	0	0	0	0	0
D_0__Bacteria;D_1__Proteobacteria;D_2__Alphaproteobacteria;D_3__Rhizobiales;D_4__Xanthobacteraceae;__	0	0	0	0	0	0	0	0	0	0	0	0	0	0	0	0	0	0	0	0	0	0	0	0	0	0	0	0	0	0	0	0	0	0	0	0	0	0	0	0	0	0	0	0	0	0	0	0	0
D_0__Bacteria;D_1__Proteobacteria;D_2__Alphaproteobacteria;D_3__Rhodobacterales;D_4__Rhodobacteraceae;D_5__Paracoccus	0	0	0	0	0	0	0	0	0	0	0	0	0	0	0	0	0	0	0	0	0	0	0	0	0	0	0	0	0	0	0	0	0	0	0	0	0	0	0	0	0	0	0	0	0	0	0	0	0
D_0__Bacteria;D_1__Proteobacteria;D_2__Alphaproteobacteria;D_3__Rhodobacterales;D_4__Rhodobacteraceae;D_5__Rubellimicrobium	0	0	0	0	0	0	0	0	0	0	0	0	0	0	0	0	0	0	0	0	0	0	0	0	0	0	0	0	0	0	0	0	0	0	0	0	0	0	0	0	0	0	0	0	0	0	0	0	0
D_0__Bacteria;D_1__Proteobacteria;D_2__Alphaproteobacteria;D_3__Rhodobacterales;D_4__Rhodobacteraceae;__	0	0	0	0	0	0	0	0	0	0	0	0	0	0	0	0	0	0	0	0	0	0	0	0	0	0	0	0	0	0	0	0	0	0	0	0	0	0	0	0	0	0	0	0	0	0	0	0	0
D_0__Bacteria;D_1__Proteobacteria;D_2__Alphaproteobacteria;D_3__Rhodospirillales;D_4__uncultured;D_5__Alphaproteobacteria bacterium canine oral taxon 081	0.530486	0	0	0	0	0	0	0	0	0	0	0	0	0	0	0	0	0	0	0	0	0	0	0	0	0	0	0.582814	0	0	0	0	0	0	0	0	0	0	0	0	0	0	0	0	0	0	0	0	0
D_0__Bacteria;D_1__Proteobacteria;D_2__Alphaproteobacteria;D_3__Rhodospirillales;D_4__uncultured;D_5__gut metagenome	0	0	0	0	0	0	0	0	0	0	0	0	0	0	0	0	0	0	0	0	0	0	0	0	0	0	0	0	0	0	0	0	0	0	0	0	0	0	0	0	0	0	0	0	0	0	0	0	0
D_0__Bacteria;D_1__Proteobacteria;D_2__Alphaproteobacteria;D_3__Rhodospirillales;D_4__uncultured;D_5__uncultured alpha proteobacterium	0.0302176	0	0	0	0	0	0	0	0	0	0	0	0	0	0	0	0	0	0	0	0	0	0	0	0	0	0.0294429	0	0	0	0	0	0	0	0	0	0	0	0	0	0	0	0	0	0	0	0	0	0
D_0__Bacteria;D_1__Proteobacteria;D_2__Alphaproteobacteria;D_3__Rhodospirillales;D_4__uncultured;D_5__uncultured bacterium	0	0	0	0	0	0	0	0	0	0	0	0	0	0	0	0	0	0	0	0	0	0	0	0	0	0	0	0	0	0	0	0	0	0	0	0	0	0	0	0	0	0	0	0	0	0	0	0	0
D_0__Bacteria;D_1__Proteobacteria;D_2__Alphaproteobacteria;D_3__Rhodospirillales;D_4__uncultured;__	0	0	0	0	0	0	0	0	0	0	0	0	0	0	0	0	0	0	0	0	0	0	0	0	0	0	0	0	0	0	0	0	0	0	0	0	0	0	0	0	0	0	0	0	0	0	0	0	0
D_0__Bacteria;D_1__Proteobacteria;D_2__Alphaproteobacteria;D_3__Rhodospirillales;__;__	0	0	0	0	0	0	0	0	0	0	0	0	0	0	0	0	0	0	0	0	0	0	0	0	0	0	0	0	0	0	0	0	0	0	0	0	0	0	0	0	0	0	0	0	0	0	0	0	0
D_0__Bacteria;D_1__Proteobacteria;D_2__Alphaproteobacteria;D_3__Rickettsiales;D_4__Mitochondria;D_5__Brassica napus (rape)	0	0	0	0	0	0	0	0	0	0	0	0	0	0	0	0	0	0	0	0	0	0	0	0	0	0	0	0	0	0.010684	0	0	0	0	0	0	0	0	0	0	0	0	0	0	0	0	0	0	0
D_0__Bacteria;D_1__Proteobacteria;D_2__Alphaproteobacteria;D_3__Rickettsiales;D_4__Mitochondria;D_5__uncultured bacterium	0	0	0	0	0	0	0	0	0	0	0	0	0	0	0	0	0	0	0	0	0	0	0	0	0	0	0	0	0	0	0	0	0	0	0	0	0	0	0	0	0	0	0	0	0	0	0	0	0
D_0__Bacteria;D_1__Proteobacteria;D_2__Alphaproteobacteria;D_3__Sphingomonadales;D_4__Sphingomonadaceae;D_5__Sphingobium	0	0	0	0	0	0	0	0	0	0	0	0	0	0	0	0	0	0	0	0	0	0	0	0	0	0	0	0	0	0	0	0	0	0	0	0	0	0	0	0	0	0	0	0	0	0	0	0	0
D_0__Bacteria;D_1__Proteobacteria;D_2__Alphaproteobacteria;D_3__Sphingomonadales;D_4__Sphingomonadaceae;D_5__Sphingomonas	0	0	0	0	0	0.048	0	0	0	0	0	0	0	0	0	0	0	0	0	0	0	0	0	0	0	0	0	0	0	0	0	0	0	0	0	0	0	0	0	0	0	0	0	0	0	0	0	0	0
D_0__Bacteria;D_1__Proteobacteria;D_2__Alphaproteobacteria;D_3__Sphingomonadales;D_4__Sphingomonadaceae;__	0	0	0	0	0	0.16	0	0	0	0	0	0	0	0	0	0	0	0	0	0	0	0	0	0	0	0.113406	0	0	0	0	0	0	0	0	0	0	0.00564239	0	0	0	0	0	0	0	0	0	0	0	0
D_0__Bacteria;D_1__Proteobacteria;D_2__Alphaproteobacteria;__;__;__	0.00671501	0	0	0	0	0	0	0	0	0	0	0	0	0	0	0	0	0	0	0	0	0	0	0	0	0	0	0.501491	0	0.00534202	0	0	0	0	0	0	0	0	0	0	0	0	0	0	0	0	0	0	0
D_0__Bacteria;D_1__Proteobacteria;D_2__Deltaproteobacteria;D_3__Bdellovibrionales;D_4__Bdellovibrionaceae;D_5__Bdellovibrio	0	0	0	0	0	0	0	0	0	0	0	0	0	0	0	0	0	0	0	0	0	0	0	0	0	0	0	0	0	0	0	0	0	0	0	0	0	0	0	0	0	0	0	0	0	0	0	0	0
D_0__Bacteria;D_1__Proteobacteria;D_2__Deltaproteobacteria;D_3__Desulfobacterales;D_4__Desulfobulbaceae;D_5__Desulfobulbus	0.020145	0.0193705	0	0	0.0468415	0	0	0	0.0360036	0	0	0	0	0	0	0	0	0	0	0	0	0	0	0.0393457	0	0	0	0	0	0.120196	0	0	0	0	0	0	0	0	0	0	0	0	0	0	0	0	0	0	0
D_0__Bacteria;D_1__Proteobacteria;D_2__Deltaproteobacteria;D_3__Desulfovibrionales;D_4__Desulfomicrobiaceae;D_5__Desulfomicrobium	0	0	0	0	0	0	0	0	0	0	0	0	0	0	0	0	0	0	0	0	0	0	0	0	0	0	0	0.135538	0	0	0	0	0	0	0	0	0	0	0	0	0	0	0	0	0	0	0	0	0
D_0__Bacteria;D_1__Proteobacteria;D_2__Deltaproteobacteria;D_3__Desulfovibrionales;D_4__Desulfovibrionaceae;D_5__Bilophila	0	0	0	0	0	0	0	0	0	0	0	0	0	0	0	0	0	0	0	0	0	0	0	0	0	0	0	0	0	0	0	0	0	0	0	0	0	0	0	0	0	0	0	0	0	0	0	0	0
D_0__Bacteria;D_1__Proteobacteria;D_2__Deltaproteobacteria;D_3__Desulfovibrionales;D_4__Desulfovibrionaceae;D_5__Desulfovibrio	0.0302176	0	0	0	0	0	0	0	0	0	0	0	0	0	0	0	0	0	0	0	0	0	0	0.118037	0	0	0	0.325291	0	0	0	0	0	0	0	0	0	0	0.0485131	0	0	0	0	0	0	0	0	0	0
D_0__Bacteria;D_1__Proteobacteria;D_2__Deltaproteobacteria;D_3__Desulfovibrionales;D_4__Desulfovibrionaceae;D_5__Mailhella	0	0	0	0	0	0	0	0	0	0	0	0	0	0	0	0	0	0	0	0	0	0	0	0	0	0	0	0	0	0	0	0	0	0	0	0	0	0	0	0	0	0	0	0	0	0	0	0	0
D_0__Bacteria;D_1__Proteobacteria;D_2__Deltaproteobacteria;D_3__Desulfovibrionales;D_4__Desulfovibrionaceae;D_5__uncultured	0	0	0	0	0	0	0	0	0	0	0	0	0	0	0	0	0	0	0	0	0	0	0	0	0	0	0	0	0	0	0	0	0	0	0	0	0	0	0	0	0	0	0	0	0	0	0	0	0
D_0__Bacteria;D_1__Proteobacteria;D_2__Deltaproteobacteria;D_3__Myxococcales;D_4__Blfdi19;D_5__uncultured soil bacterium	0	0	0	0	0	0	0	0	0	0	0	0	0	0	0	0	0	0	0	0	0	0	0	0	0	0	0	0	0	0	0	0	0	0	0	0	0	0	0	0	0	0	0	0	0	0	0	0	0
D_0__Bacteria;D_1__Proteobacteria;D_2__Deltaproteobacteria;__;__;__	0	0	0	0	0	0	0	0	0	0	0	0	0	0	0	0	0	0	0	0	0	0	0	0	0	0	0	0	0	0	0	0	0	0	0	0	0	0	0	0	0	0	0	0	0	0	0	0	0
D_0__Bacteria;D_1__Proteobacteria;D_2__Gammaproteobacteria;D_3__Aeromonadales;D_4__Aeromonadaceae;D_5__Aeromonas	0	0	0	0	0	0	0	0	0	0	0	0	0	0	0	0	0	0	0	0	0	0	0	0	0	0	0	0	0	0	0	0	0	0	0	0	0	0	0	0	0	0	0	0	0	0	0	0	0
D_0__Bacteria;D_1__Proteobacteria;D_2__Gammaproteobacteria;D_3__Aeromonadales;D_4__Succinivibrionaceae;D_5__Succinatimonas	0	0	0	0	0	0	0	0	0	0	0	0	0	0	0	0	0	0	0	0	0	0	0	0	0	0	0	0	0	0	0	0	0	0	0	0	0	0	0	0	0	0	0	0	0	0	0	0	0
D_0__Bacteria;D_1__Proteobacteria;D_2__Gammaproteobacteria;D_3__Betaproteobacteriales;D_4__Burkholderiaceae;D_5__Achromobacter	0	0	0	0	0	0	0	0	0	0	0	0	0	0	0	0	0	0	0	0	0	0	0	0	0	0	0	0	0	0	0	0	0	0	0	0	0	0	0	0	0	0	0	0	0	0	0	0	0
D_0__Bacteria;D_1__Proteobacteria;D_2__Gammaproteobacteria;D_3__Betaproteobacteriales;D_4__Burkholderiaceae;D_5__Acidovorax	0	0	0	0	0	0	0	0	0	0	0	0	0	0	0	0	0	0	0	0	0	0	0	0	0	0	0	0	0	0	0	0	0	0	0	0	0	0	0	0	0	0	0	0	0	0	0	0	0
D_0__Bacteria;D_1__Proteobacteria;D_2__Gammaproteobacteria;D_3__Betaproteobacteriales;D_4__Burkholderiaceae;D_5__Brachymonas	0	0	0	0	0	0	0	0	0	0	0	0	0	0	0	0	0	0	0	0	0	0	0	0	0	0	0	0	0	0	0	0	0	0	0	0	0	0	0	0	0	0	0	0	0	0	0	0	0
D_0__Bacteria;D_1__Proteobacteria;D_2__Gammaproteobacteria;D_3__Betaproteobacteriales;D_4__Burkholderiaceae;D_5__Burkholderia-Caballeronia-Paraburkholderia	0	0	0	0	0	0	0	0	0	0	0	0	0	0	0	0	0	0	0	0	0	0	0	0	0	0	0	0	0	0	0	0	0	0	0	0	0	0	0.0194052	0	0	0	0	0	0	0	0	0	0
D_0__Bacteria;D_1__Proteobacteria;D_2__Gammaproteobacteria;D_3__Betaproteobacteriales;D_4__Burkholderiaceae;D_5__Comamonas	0	0.280872	0.0132914	0.201532	0.635707	0	0.189244	0	0.0480048	0	0	0	0.0386463	0.0566447	0.0286189	0	0	0	0.0448783	0.0497512	0	0	0	0	0.0483877	0	0.211989	0	0.281219	0.0694463	0.0632553	0	0.0253301	0.458528	0	0.0302297	0.0507815	0	0	0.0936257	0	0	0.142987	0.377155	0.0554631	0	0.0481541	0	0.233834
D_0__Bacteria;D_1__Proteobacteria;D_2__Gammaproteobacteria;D_3__Betaproteobacteriales;D_4__Burkholderiaceae;D_5__Cupriavidus	0	0	0	0	0	0	0	0	0	0	0	0	0	0	0	0	0	0	0	0	0	0	0	0	0	0	0	0	0	0	0	0	0	0	0	0	0	0	0	0	0	0	0	0	0	0	0	0	0
D_0__Bacteria;D_1__Proteobacteria;D_2__Gammaproteobacteria;D_3__Betaproteobacteriales;D_4__Burkholderiaceae;D_5__Curvibacter	0	0	0	0	0	0	0	0	0	0	0	0	0	0	0	0	0	0	0	0	0	0	0	0	0	0	0	0	0	0	0	0	0	0	0	0	0	0	0	0	0	0	0	0	0	0	0	0	0
D_0__Bacteria;D_1__Proteobacteria;D_2__Gammaproteobacteria;D_3__Betaproteobacteriales;D_4__Burkholderiaceae;D_5__Delftia	0	0	0	0	0	0.304	0	0	0	0	0	0	0	0	0	0	0	0	0	0	0	0	0	0	0	0.0895309	0	0	0	0	0	0	0	0	0	0	0	0	0	0	0	0	0	0	0	0	0	0	0
D_0__Bacteria;D_1__Proteobacteria;D_2__Gammaproteobacteria;D_3__Betaproteobacteriales;D_4__Burkholderiaceae;D_5__Herbaspirillum	0	0	0	0	0	0.096	0	0	0	0	0	0	0	0	0	0	0	0	0	0	0	0	0	0	0	0.0298436	0	0	0	0	0	0	0	0	0	0	0	0	0	0	0	0	0	0	0	0	0	0	0
D_0__Bacteria;D_1__Proteobacteria;D_2__Gammaproteobacteria;D_3__Betaproteobacteriales;D_4__Burkholderiaceae;D_5__Lautropia	0	0.707022	0.301272	0.82628	1.03051	1.056	2.55652	0	0.834083	0.648731	0	0.954687	0.574173	0.377632	6.27325	0.718891	2.19616	1.86779	4.15124	0.583446	4.46292	2.04958	0	2.52375	0.618671	0.286499	0.747851	0.0880998	0.58524	0.878763	1.60469	1.80326	0.275465	2.84651	0.641184	1.02781	0	0.634363	1.77558	1.30296	0.195646	0.47934	1.47212	1.05065	0.425217	2.03317	0.727662	1.10746	3.38592
D_0__Bacteria;D_1__Proteobacteria;D_2__Gammaproteobacteria;D_3__Betaproteobacteriales;D_4__Burkholderiaceae;D_5__Massilia	0	0	0	0	0	0	0	0	0	0	0	0	0	0	0	0	0	0	0	0	0	0	0	0	0	0	0	0	0	0	0	0	0	0	0	0	0	0	0	0	0	0	0	0	0	0	0	0	0
D_0__Bacteria;D_1__Proteobacteria;D_2__Gammaproteobacteria;D_3__Betaproteobacteriales;D_4__Burkholderiaceae;D_5__Oxalobacter	0	0	0	0	0	0	0	0	0	0	0	0	0	0	0	0	0	0	0	0	0	0	0	0	0	0	0	0	0	0	0	0	0	0	0	0	0	0	0	0	0	0	0	0	0	0	0	0	0
D_0__Bacteria;D_1__Proteobacteria;D_2__Gammaproteobacteria;D_3__Betaproteobacteriales;D_4__Burkholderiaceae;D_5__Parasutterella	0	0	0	0	0	0	0	0	0	0	0	0	0	0	0	0	0	0	0	0	0	0	0	0	0	0	0	0	0	0	0	0	0	0	0	0	0	0	0	0	0	0	0	0	0	0	0	0	0
D_0__Bacteria;D_1__Proteobacteria;D_2__Gammaproteobacteria;D_3__Betaproteobacteriales;D_4__Burkholderiaceae;D_5__Polaromonas	0	0	0	0	0	0	0	0	0	0	0	0	0	0	0	0	0	0	0	0	0	0	0	0	0	0	0	0	0	0	0	0	0	0	0	0	0	0	0	0	0	0	0	0	0	0	0	0	0
D_0__Bacteria;D_1__Proteobacteria;D_2__Gammaproteobacteria;D_3__Betaproteobacteriales;D_4__Burkholderiaceae;D_5__Ralstonia	0	0	0	0	0	0	0	0	0	0	0	0	0	0	0	0	0	0	0	0	0	0	0	0	0	0	0	0	0	0	0	0	0	0	0	0	0	0	0	0	0	0	0	0	0	0	0	0	0
D_0__Bacteria;D_1__Proteobacteria;D_2__Gammaproteobacteria;D_3__Betaproteobacteriales;D_4__Burkholderiaceae;D_5__Ramlibacter	0	0	0	0	0	0	0	0	0	0	0	0	0	0	0	0	0	0	0	0	0	0	0	0	0	0	0	0	0	0	0	0	0	0	0	0	0	0	0	0	0	0	0	0	0	0	0	0	0
D_0__Bacteria;D_1__Proteobacteria;D_2__Gammaproteobacteria;D_3__Betaproteobacteriales;D_4__Burkholderiaceae;D_5__Rhodoferax	0	0	0	0	0	0	0	0	0	0	0	0	0	0	0	0	0	0	0	0	0	0	0	0	0	0	0	0	0	0	0	0	0	0	0	0	0	0	0	0	0	0	0	0	0	0	0	0	0
D_0__Bacteria;D_1__Proteobacteria;D_2__Gammaproteobacteria;D_3__Betaproteobacteriales;D_4__Burkholderiaceae;D_5__Sutterella	0	0	0	0	0	0	0	0	0	0	0	0	0	0	0	0	0	0	0	0	0	0	0	0	0	0	0	0	0	0	0	0	0	0	0	0	0	0	0.0145539	0	0	0	0	0	0	0	0	0	0
D_0__Bacteria;D_1__Proteobacteria;D_2__Gammaproteobacteria;D_3__Betaproteobacteriales;D_4__Burkholderiaceae;D_5__Variovorax	0	0	0	0	0	0	0	0	0	0	0	0	0	0	0	0	0	0	0	0	0	0	0	0	0	0	0	0	0	0	0	0	0	0	0	0	0	0	0	0	0	0	0	0	0	0	0	0	0
D_0__Bacteria;D_1__Proteobacteria;D_2__Gammaproteobacteria;D_3__Betaproteobacteriales;D_4__Burkholderiaceae;__	0	0	0	0	0	0	0	0	0	0	0	0	0	0	0	0	0	0	0	0	0	0	0	0	0	0	0	0	0	0	0	0	0	0	0	0	0	0	0	0	0	0	0	0	0	0	0	0	0
D_0__Bacteria;D_1__Proteobacteria;D_2__Gammaproteobacteria;D_3__Betaproteobacteriales;D_4__Methylophilaceae;__	0	0	0	0	0	0	0	0	0	0	0	0	0	0	0	0	0	0	0	0	0	0	0	0	0	0	0	0	0	0	0	0	0	0	0	0	0	0	0	0	0	0	0	0	0	0	0	0	0
D_0__Bacteria;D_1__Proteobacteria;D_2__Gammaproteobacteria;D_3__Betaproteobacteriales;D_4__Neisseriaceae;D_5__Alysiella	0	0.154964	0	0.423216	0	0	0.051612	0.0188064	0	0	0	0.0830163	0.0938552	0	0	0.0456439	0	0	0	0.0814111	0.110045	0	0	0	0.0276501	0	0	0	0	0	0	0	0	0	0	0	0.0282119	0	0	0	0	0	0.0129988	0	0	0	0.0963082	0	0
D_0__Bacteria;D_1__Proteobacteria;D_2__Gammaproteobacteria;D_3__Betaproteobacteriales;D_4__Neisseriaceae;D_5__Eikenella	0	0.209847	0	0	0.200749	0.024	0.0309672	0	0.0240024	0	0	0.0553442	0.104897	0.0597917	0	0	0.0355366	0	0	0	0	0	0	0	0.0172813	0.0417811	0.158992	0.0338845	0.155811	0.0641043	0.0332923	0	0	0.249694	0	0.0755744	0	0	0	0.124834	0	0	0.103991	0.17174	0	0.0601926	0.128411	0.0558971	0.0530024
D_0__Bacteria;D_1__Proteobacteria;D_2__Gammaproteobacteria;D_3__Betaproteobacteriales;D_4__Neisseriaceae;D_5__Kingella	0	0.235674	0.0797483	0.208249	1.03721	0.224	0.08602	0.100301	0.10201	0.0127202	0.0507872	0.0691802	0.0662508	0.446864	0.34915	0.171164	0.163468	0.0702617	0	0.0633198	0.171181	0.0585594	0.0835112	0.0843123	0.183182	0.51331	0.370981	0	0.14061	0.769251	0.0832307	0.119818	0.0189976	0	0.0863132	0	0.132596	0.17567	0.218309	0.374503	0.154019	0.30338	0.100741	0.303071	0.221852	0.24077	0.342429	0.356344	0.289954
D_0__Bacteria;D_1__Proteobacteria;D_2__Gammaproteobacteria;D_3__Betaproteobacteriales;D_4__Neisseriaceae;D_5__Neisseria	0.365968	7.1703	6.75646	4.33965	5.55407	4.832	3.92595	5.3661	5.25653	4.97997	2.85678	8.14251	6.18893	0.557007	3.98374	4.35899	1.44989	11.4995	3.83148	3.96201	19.0316	2.60915	0.3758	2.14153	4.67978	0.596872	9.4453	1.45703	8.31117	0.900131	4.93724	4.0139	3.49872	11.0228	3.51418	6.79414	0.770186	3.89889	5.58385	1.27955	6.03588	14.4287	4.10763	10.4762	11.5055	4.75522	10.0535	2.6062	4.81075
D_0__Bacteria;D_1__Proteobacteria;D_2__Gammaproteobacteria;D_3__Betaproteobacteriales;D_4__Neisseriaceae;D_5__Simonsiella	0	0	0	0	0	0	0	0	0.144014	0	0	0	0	0	0	0	0	0	0	0	0	0	0	0	0	0	0	0	0	0	0	0	0	0	0	0	0	0	0	0	0	0	0	0	0	0	0	0	0
D_0__Bacteria;D_1__Proteobacteria;D_2__Gammaproteobacteria;D_3__Betaproteobacteriales;D_4__Neisseriaceae;D_5__uncultured	0	0	0	0	0	0	0	0	0	0	0	0	0	0	0	0	0	0	0	0	0	0	0	0	0	0	0	0	0	0	0	0	0	0	0	0	0	0.0390377	0	0	0	0	0	0	0	0	0	0	0
D_0__Bacteria;D_1__Proteobacteria;D_2__Gammaproteobacteria;D_3__Betaproteobacteriales;D_4__Neisseriaceae;__	0	0	0	0	0	0	0	0	0	0	0	0	0	0	0.074409	0.142637	0	0	0.0953663	0	0	0	0.0695927	0	0	0	0.0294429	0	0.106407	0	0	0.0419363	0	0.0181595	0	0	0.0169272	0	0	0	0	0	0	0	0	0	0.0428036	0	0
D_0__Bacteria;D_1__Proteobacteria;D_2__Gammaproteobacteria;D_3__Betaproteobacteriales;D_4__Nitrosomonadaceae;D_5__IS-44	0	0	0	0	0	0	0	0	0	0	0	0	0	0	0	0	0	0	0	0	0	0	0	0	0	0	0	0	0	0	0	0	0	0	0	0	0	0	0	0	0	0	0	0	0	0	0	0	0
D_0__Bacteria;D_1__Proteobacteria;D_2__Gammaproteobacteria;D_3__Betaproteobacteriales;D_4__Rhodocyclaceae;D_5__Propionivibrio	0	0	0	0	0	0	0	0	0	0	0	0	0	0	0	0	0	0	0	0	0	0	0	0	0	0	0	0	0	0	0	0	0	0	0	0	0	0	0	0	0	0	0	0	0	0	0	0	0
D_0__Bacteria;D_1__Proteobacteria;D_2__Gammaproteobacteria;D_3__Betaproteobacteriales;D_4__Rhodocyclaceae;D_5__Zoogloea	0	0	0	0	0	0	0	0	0	0	0	0	0	0	0	0	0	0	0	0	0	0	0	0	0	0	0	0	0	0	0	0	0	0	0	0	0	0	0	0	0	0	0	0	0	0	0	0	0
D_0__Bacteria;D_1__Proteobacteria;D_2__Gammaproteobacteria;D_3__Cardiobacteriales;D_4__Cardiobacteriaceae;D_5__Cardiobacterium	0	0.290557	0.0310132	0.248556	0.595557	0.136	0.196126	0.0250752	0	0	0	0.0760982	0.143543	0.251754	0.206056	0.211103	0	0	0.0448783	0.0316599	0.330134	0.065066	0	0	0.100232	0	0.0588859	0	0.0722049	0.734528	0.0565969	0	0	0.208835	0.0863132	0	0.0959206	0	0	0.226262	0.0915789	0.139555	0.123489	0.673491	0	0	0.363831	0.0873393	0.261894
D_0__Bacteria;D_1__Proteobacteria;D_2__Gammaproteobacteria;D_3__Cardiobacteriales;D_4__Cardiobacteriaceae;D_5__uncultured	0	0	0	0	0	0	0	0	0	0	0	0	0	0	0	0	0	0	0	0	0	0	0	0	0	0	0	0	0	0	0	0	0	0	0	0	0	0	0	0	0	0	0	0	0	0	0.0160514	0	0
D_0__Bacteria;D_1__Proteobacteria;D_2__Gammaproteobacteria;D_3__Diplorickettsiales;D_4__Diplorickettsiaceae;D_5__Rickettsiella	0	0	0	0	0	0	0	0	0	0	0	0	0	0	0	0	0	0	0	0	0	0	0	0	0	0	0	0	0	0	0	0	0	0	0	0	0	0	0	0	0	0	0	0	0	0	0	0	0
D_0__Bacteria;D_1__Proteobacteria;D_2__Gammaproteobacteria;D_3__Enterobacteriales;D_4__Enterobacteriaceae;D_5__Buchnera	0	0	0	0	0	0	0	0	0	0	0	0	0	0	0	0	0	0	0	0	0	0	0	0	0	0	0	0	0	0	0	0	0	0	0	0	0	0	0	0	0	0	0	0	0	0	0	0	0
D_0__Bacteria;D_1__Proteobacteria;D_2__Gammaproteobacteria;D_3__Enterobacteriales;D_4__Enterobacteriaceae;D_5__Escherichia-Shigella	0	0	0	0	0	0	0	0	0	0	0	0	0	0	0	0	0	0	0	0	0	0	0	0	0	0	0	0	0	0	0	0	0	0	0	0	0	0	0	0	0	0	0	0	0	0	0	0	0
D_0__Bacteria;D_1__Proteobacteria;D_2__Gammaproteobacteria;D_3__Enterobacteriales;D_4__Enterobacteriaceae;D_5__Klebsiella	0	0	0	0	0	0	0	0	0	0	0	0	0	0	0	0	0	0	0	0	0	0	0	0	0	0	0	0	0	0	0	0	0	0	0	0	0	0	0	0	0	0	0	0	0	0	0	0	0
D_0__Bacteria;D_1__Proteobacteria;D_2__Gammaproteobacteria;D_3__Enterobacteriales;D_4__Enterobacteriaceae;D_5__Proteus	0	0	0	0	0	0	0	0	0	0	0	0	0	0	0	0	0	0	0	0	0	0	0	0	0	0	0	0	0	0	0	0	0	0	0	0	0	0	0	0	0	0	0	0	0	0	0	0	0
D_0__Bacteria;D_1__Proteobacteria;D_2__Gammaproteobacteria;D_3__Enterobacteriales;D_4__Enterobacteriaceae;D_5__Providencia	0	0	0	0	0	0	0	0	0	0	0	0	0	0	0	0	0	0	0	0	0	0	0	0	0	0	0	0	0	0	0	0	0	0	0	0	0	0	0	0	0	0	0	0	0	0	0	0	0
D_0__Bacteria;D_1__Proteobacteria;D_2__Gammaproteobacteria;D_3__Enterobacteriales;D_4__Enterobacteriaceae;D_5__Serratia	0	0	0	0	0	0	0	0	0	0.0890415	0	0	0	0	0	0	0	0	0	0	0	0	0	0	0	0	0	0	0	0	0	0	0	0	0	0	0	0	0	0	0	0	0	0	0	0	0	0	0
D_0__Bacteria;D_1__Proteobacteria;D_2__Gammaproteobacteria;D_3__Enterobacteriales;D_4__Enterobacteriaceae;__	0	0	0	0	0	0	0	0	0	0	0	0	0.0220836	0	0	0	0	0	0	0	0	0	0	0	0	0	0	0	0	0	0	0	0	0	0	0	0	0	0	0	0	0.030338	0	0	0	0	0	0	0
D_0__Bacteria;D_1__Proteobacteria;D_2__Gammaproteobacteria;D_3__Nitrococcales;D_4__Nitrococcales Incertae Sedis;D_5__Methylonatrum	0	0	0	0	0	0	0	0	0	0	0	0	0	0	0	0	0	0	0	0	0	0	0	0	0	0	0	0	0	0	0	0	0	0	0	0	0	0	0	0	0	0	0	0	0	0	0	0	0
D_0__Bacteria;D_1__Proteobacteria;D_2__Gammaproteobacteria;D_3__Oceanospirillales;D_4__Halomonadaceae;D_5__Halomonas	0	0	0	0	0	0	0	0	0	0	0	0	0	0	0	0	0	0	0	0	0	0	0	0	0	0	0	0	0	0	0	0	0	0	0	0	0	0	0	0	0	0	0	0	0	0	0	0	0
D_0__Bacteria;D_1__Proteobacteria;D_2__Gammaproteobacteria;D_3__Pasteurellales;D_4__Pasteurellaceae;D_5__Actinobacillus	0	0	0	0	0	0	0	0	0	0.502449	0	0.124524	0	0	0	0	0	0	0	0	0	0.435942	0	0	0	0	0.211989	0	0	0	0	0	0	0	0	0	0.457033	0	0	0	0	0	0	0	0.474518	0	0	0	0
D_0__Bacteria;D_1__Proteobacteria;D_2__Gammaproteobacteria;D_3__Pasteurellales;D_4__Pasteurellaceae;D_5__Aggregatibacter	0.0738652	1.11057	0.310132	0.712078	1.34502	0.432	0.705364	0.0689569	0.510051	0.616931	1.65058	0.677966	0.458234	0.456305	0.904356	1.34649	1.11585	0.234206	2.45709	0.511081	0.984288	0	0	0.522736	0	0	1.87257	0.406614	1.72912	1.80293	0.589273	0.1318	0.535098	0.222454	0	0.627267	0.217232	1.23945	0.378402	0.483733	0.212297	0	0.454959	5.1118	1.71936	0.421348	0.658106	0.569452	0.333604
D_0__Bacteria;D_1__Proteobacteria;D_2__Gammaproteobacteria;D_3__Pasteurellales;D_4__Pasteurellaceae;D_5__Haemophilus	0.127585	2.33737	1.06774	2.06906	2.98448	0.464	1.30062	4.47593	1.71617	1.31018	3.09802	4.32376	3.31254	0.298958	1.78009	2.30502	0.760483	1.48721	2.24952	1.46992	8.60182	3.16872	0.204138	1.02861	0.819134	1.21762	2.7323	0.311738	2.70198	0.304495	1.52479	1.01845	1.30133	0.653743	0.228113	1.66264	0.54449	0.844191	1.21768	1.39658	2.56005	5.72174	2.06681	1.90261	2.68072	0.421348	1.92081	4.93642	0.339839
D_0__Bacteria;D_1__Proteobacteria;D_2__Gammaproteobacteria;D_3__Pasteurellales;D_4__Pasteurellaceae;__	0.157803	0.91364	0.717735	3.56039	2.33539	1.072	0.340639	1.34152	0.612061	1.76175	1.26333	4.10239	1.59554	0.213991	1.17337	7.51983	5.41578	0.544528	0.751711	1.87698	1.19215	1.06058	0.338684	0.545219	1.05416	0.423779	0.329761	0.603144	1.4175	2.23831	2.70666	0.257608	1.45015	0.903437	0.462392	1.27721	0.651696	0.51237	1.13035	3.51876	0.578612	5.31521	1.47862	1.37392	2.57595	2.16693	1.10219	1.88304	0.795036
D_0__Bacteria;D_1__Proteobacteria;D_2__Gammaproteobacteria;D_3__Pseudomonadales;D_4__Moraxellaceae;D_5__Acinetobacter	0	0	0	0	0	0	0	0	0	0	0	0	0	0	0.0114475	0	0	0	0	0	0	0	0	0	0	0	0	0	0	0.0667753	0	0	0	0	0	0	0	0	0	0	0	0	0	0	0	0	0	0	0
D_0__Bacteria;D_1__Proteobacteria;D_2__Gammaproteobacteria;D_3__Pseudomonadales;D_4__Moraxellaceae;D_5__Enhydrobacter	0	0	0	0	0	0	0	0	0	0	0	0	0	0	0	0	0	0	0	0	0	0	0	0	0	0	0	0	0	0	0	0	0	0	0	0	0	0	0	0	0	0	0	0	0	0	0	0	0
D_0__Bacteria;D_1__Proteobacteria;D_2__Gammaproteobacteria;D_3__Pseudomonadales;D_4__Moraxellaceae;D_5__Moraxella	0	0	0	0	0	0	0	0	0	0	0	0	0.391984	0	0	0	0	0	0	0	0	0	0	0	0	0	0	0	0	0	0	0	0	0	0	0	0	0	0	0	0	0	0	0	0	0	0	0	0.289954
D_0__Bacteria;D_1__Proteobacteria;D_2__Gammaproteobacteria;D_3__Pseudomonadales;D_4__Pseudomonadaceae;D_5__Pseudomonas	0	0	0	0	0	0	0	0	0	0.381607	0	0	0	0	0.0286189	0.0171164	0	0.0526963	0	1.13071	0.0427951	0	0	0.0112416	0	0.0179062	0	0	0	0	0	0	0	0	0	0	0	0	0	0	0	0	0	0	0	0	0	0	0
D_0__Bacteria;D_1__Proteobacteria;D_2__Gammaproteobacteria;D_3__Pseudomonadales;D_4__Pseudomonadaceae;D_5__Thiopseudomonas	0	0	0	0	0	0	0	0	0	0	0	0	0	0	0	0	0	0	0	0	0	0	0	0	0	0	0	0	0	0	0	0	0	0	0	0	0	0	0	0	0	0	0	0	0	0	0	0	0
D_0__Bacteria;D_1__Proteobacteria;D_2__Gammaproteobacteria;D_3__Salinisphaerales;D_4__Solimonadaceae;D_5__Hydrocarboniphaga	0	0	0	0	0	0	0	0	0	0	0	0	0	0	0	0	0	0	0	0	0	0	0	0	0	0	0	0	0	0	0	0	0	0	0	0	0	0	0	0	0	0	0	0	0	0	0	0	0
D_0__Bacteria;D_1__Proteobacteria;D_2__Gammaproteobacteria;D_3__Xanthomonadales;D_4__Xanthomonadaceae;D_5__Pseudoxanthomonas	0	0	0	0	0	0	0	0	0	0	0	0	0	0	0	0	0	0	0	0	0	0	0	0	0	0	0	0	0	0	0	0	0	0	0	0	0	0	0	0	0	0	0	0	0	0	0	0	0
D_0__Bacteria;D_1__Proteobacteria;D_2__Gammaproteobacteria;D_3__Xanthomonadales;D_4__Xanthomonadaceae;D_5__Stenotrophomonas	0	0	0	0	0	0.096	0	0	0	0.0254404	0	0	0	0	0	0	0	0	0	0	0	0	0	0	0	0.0298436	0	0	0	0	0	0	0	0	0	0	0	0	0	0	0	0	0	0	0	0	0	0	0
D_0__Bacteria;D_1__Proteobacteria;D_2__Gammaproteobacteria;D_3__Xanthomonadales;D_4__Xanthomonadaceae;D_5__Xanthomonas	0	0	0	0	0	0	0	0	0	0	0	0	0	0	0	0	0	0	0	0	0	0	0	0	0	0	0	0	0	0	0	0	0	0	0	0	0	0	0	0	0	0	0	0	0	0	0	0	0
D_0__Bacteria;D_1__Proteobacteria;D_2__Gammaproteobacteria;__;__;__	0	0	0	0	0	0	0	0	0	0.0954016	0	0	0	0	0	0	0	0	0	0	0	0	0	0	0	0	0	0	0	0	0	0	0	0	0	0	0	0	0	0	0.0416268	0	0	0	0	0	0	0.0104807	0.00623558
D_0__Bacteria;D_1__Proteobacteria;__;__;__;__	0	0	0	0	0	0	0	0	0	0	0	0	0	0	0	0	0	0	0	0	0	0	0	0	0	0	0	0	0	0	0	0	0	0	0	0	0	0	0	0	0	0	0	0	0	0	0	0	0
D_0__Bacteria;D_1__Spirochaetes;D_2__Brachyspirae;D_3__Brachyspirales;D_4__Brachyspiraceae;D_5__Brachyspira	0	0	0	0	0	0	0	0	0	0	0	0	0	0	0	0	0	0	0	0	0	0	0	0	0	0	0	0	0	0	0	0	0	0	0	0	0	0	0	0	0	0	0	0	0	0	0	0	0
D_0__Bacteria;D_1__Spirochaetes;D_2__Spirochaetia;D_3__Spirochaetales;D_4__Spirochaetaceae;D_5__Sphaerochaeta	0	0	0	0	0	0	0	0	0	0	0	0	0	0	0	0	0	0	0	0	0	0	0	0.0337249	0	0	0	0	0	0	0	0	0	0	0	0	0	0	0	0	0	0	0	0	0	0	0	0	0
D_0__Bacteria;D_1__Spirochaetes;D_2__Spirochaetia;D_3__Spirochaetales;D_4__Spirochaetaceae;D_5__Treponema 2	4.11295	0.945924	2.00257	0.0806127	0.254283	0	0.13075	0.162989	2.10021	0.120842	0.177755	0.0760982	1.28085	0.166787	0.0915803	0	2.08244	0.304467	0.0224391	0.217096	1.49172	0.201705	0.519625	2.57996	0.141707	1.13406	0.259098	4.43887	0.501634	2.18222	0	0.473281	0.0221638	0.131657	0.0863132	0.105804	0.0225695	0.0975943	0.349294	0.374503	0.0957416	0.0970815	0.279475	0.0740841	0	0	0.914928	0.0524036	1.32818
D_0__Bacteria;D_1__Synergistetes;D_2__Synergistia;D_3__Synergistales;D_4__Synergistaceae;D_5__Fretibacterium	0.480124	0.0225989	0.119623	0	0.180675	0	0.017204	0	0.210021	0	0	0	0.0717717	0	0	0	0.142146	0	0	0	0.0550223	0	0.0278371	0.449666	0.0380189	0.101468	0.0883288	0.257522	0.0304021	0.405994	0	0	0	0	0	0	0	0.0243986	0.0727696	0	0	0	0	0.0134698	0	0.0334403	0	0	0.402195
D_0__Bacteria;D_1__Synergistetes;D_2__Synergistia;D_3__Synergistales;D_4__Synergistaceae;D_5__Jonquetella	0	0	0	0	0	0	0	0	0	0	0	0	0	0	0	0	0	0	0	0	0	0	0	0	0	0	0	0	0	0	0	0	0	0	0	0	0	0	0	0	0	0	0	0	0	0	0	0	0
D_0__Bacteria;D_1__Synergistetes;D_2__Synergistia;D_3__Synergistales;D_4__Synergistaceae;D_5__Pyramidobacter	0.0100725	0	0	0	0	0	0	0	0	0	0	0	0	0	0	0	0	0	0	0	0	0	0	0	0	0	0	0	0	0	0	0	0	0	0	0	0	0	0	0	0	0	0	0	0	0	0	0	0
D_0__Bacteria;D_1__Synergistetes;D_2__Synergistia;D_3__Synergistales;D_4__Synergistaceae;D_5__Synergistes	0	0	0	0	0	0	0	0	0	0	0	0	0	0	0	0	0	0	0	0	0	0	0	0	0	0	0	0	0	0	0	0	0	0	0	0	0	0	0	0	0	0	0	0	0	0	0	0	0
D_0__Bacteria;D_1__Tenericutes;D_2__Mollicutes;D_3__Acholeplasmatales;D_4__Acholeplasmataceae;D_5__Acholeplasma	0.255171	0	0	0	0	0	0	0	0	0	0	0	0	0	0	0	0	0	0	0	0	0	0	0.320387	0	0	0.270875	0.698021	0	0	0	0	0	0	0	0	0	0	0	0	0	0	0	0	0	0	0	0	0
D_0__Bacteria;D_1__Tenericutes;D_2__Mollicutes;D_3__Anaeroplasmatales;D_4__Anaeroplasmataceae;D_5__Anaeroplasma	0	0	0	0	0	0	0	0	0	0	0	0	0	0	0	0	0	0	0	0	0	0	0	0	0	0	0	0	0	0	0	0	0	0	0	0	0	0	0	0	0	0	0	0	0	0	0	0	0
D_0__Bacteria;D_1__Tenericutes;D_2__Mollicutes;D_3__Izimaplasmatales;D_4__uncultured bacterium;D_5__uncultured bacterium	0	0	0	0	0	0	0	0	0	0	0	0	0	0	0	0	0	0	0	0	0	0	0	0	0	0	0	0.101654	0	0	0	0	0	0	0	0	0	0	0.0145539	0	0	0	0	0	0	0	0	0	0
D_0__Bacteria;D_1__Tenericutes;D_2__Mollicutes;D_3__Izimaplasmatales;D_4__uncultured organism;D_5__uncultured organism	0	0	0	0	0	0	0	0	0	0	0	0	0	0	0	0	0	0	0	0	0	0	0	0	0	0	0	0	0	0	0	0	0	0	0	0	0	0	0	0	0	0	0	0	0	0	0	0	0
D_0__Bacteria;D_1__Tenericutes;D_2__Mollicutes;D_3__Mollicutes RF39;D_4__Firmicutes oral clone FM046;D_5__Firmicutes oral clone FM046	0.0906527	0	0.203801	0	0	0	0.161718	0	0.0240024	0	0	0	0.0717717	0	0	0	0	0.146379	0	0.113071	0	0	0	0.224833	0	0	0	0	0.304021	0	0	0.413372	0.421113	0	0	0.0529021	0	0	0	0	0	0	0	0	0	0.260835	0	0	0
D_0__Bacteria;D_1__Tenericutes;D_2__Mollicutes;D_3__Mollicutes RF39;D_4__uncultured bacterium;D_5__uncultured bacterium	0	0	0.057596	0	0	0	0	0	0	0.0254404	0	0	0.0883343	0	0	0.0285274	0	0.263481	0	0	0	0	0	0.359732	0	0	0.129549	0	0.258418	0.0320521	0	0	0.0316626	0	0.0554871	0	0	0	0	0	0	0	0.289224	0.0235722	0	0	0	0	0.11224
D_0__Bacteria;D_1__Tenericutes;D_2__Mollicutes;D_3__Mollicutes RF39;__;__	0	0	0	0	0	0	0	0	0	0	0	0	0	0	0	0	0	0	0	0	0	0	0	0	0	0	0	0	0	0	0	0	0	0	0	0	0	0	0	0	0	0	0	0	0	0	0	0	0
D_0__Bacteria;D_1__Tenericutes;D_2__Mollicutes;D_3__Mycoplasmatales;D_4__Mycoplasmataceae;D_5__Mycoplasma	0.584206	0	0.239245	0	0.0267666	0	0.0997832	0.0501505	0.0480048	0	0.0507872	0	0.0938552	0.0597917	0.103028	0.011411	0.362473	0.19322	0	0.0407056	0.360702	0	0	1.05671	0	0.441686	0	0.643806	0.0190013	0.0534202	0	0.0898634	0	0.0453988	0	0.0302297	0	0	0.130985	0.140438	0	0.0364056	0	0	0	0	0	0.024455	0.0654736
D_0__Bacteria;D_1__Tenericutes;D_2__Mollicutes;D_3__Mycoplasmatales;D_4__Mycoplasmataceae;D_5__Ureaplasma	0	0	0	0	0	0	0	0	0	0	0	0	0	0	0	0	0	0	0	0	0	0	0	0	0	0	0	0	0	0	0	0	0	0	0	0	0	0	0	0	0	0	0	0	0	0	0	0	0
D_0__Bacteria;D_1__Verrucomicrobia;D_2__Verrucomicrobiae;D_3__Verrucomicrobiales;D_4__Akkermansiaceae;D_5__Akkermansia	0	0	0	0	0	0	0	0	0	0	0	0	0	0	0	0	0	0	0	0	0	0	0	0	0	0	0	0	0	0	0	0	0	0	0	0	0	0	0	0	0	0	0	0	0	0	0	0	0
D_0__Bacteria;D_1__Verrucomicrobia;D_2__Verrucomicrobiae;D_3__Verrucomicrobiales;D_4__Rubritaleaceae;D_5__Luteolibacter	0	0	0	0	0	0	0	0	0	0	0	0	0	0	0	0	0	0	0	0	0	0	0	0	0	0	0	0	0	0	0	0	0	0	0	0	0	0	0	0	0	0	0	0	0	0	0	0	0
D_0__Bacteria;__;__;__;__;__	0	0	0.0886093	0.047024	0	0.528	0.251178	0	0	0.356166	0.0380904	0	0.436151	0	0	0.011411	0.0142146	0	0.0392685	0	0.207862	0	0.259813	0.0674498	0	0	0	0.257522	0.0342023	0.315179	0.123181	0	0.205807	0	0.135635	0	0.191841	0	0	0	0	0	0.155986	1.07085	0	0.314339	0	0.29346	0.0218245
Unassigned;__;__;__;__;__	0	0.0355125	0	0	0	0	0	0	0	0	0	0	0	0.0314693	0	0	0	0	0.0168294	0	0	0	0.00927902	0	0.00691252	0	0	0	0	0.23772	0.00665845	0	0	0	0	0	0.14106	0.034158	0	0	0	0	0	0.037042	0	0	0	0	0.00623558
[truncated: 125 more columns]

## Sheet: FIG2B,2C, 2D
			Observed-ASVs	Shannon
sample-id	tissue	No.	depth-11009_iter-10	depth-11009_iter-10	Pielou's evenness index	tissue_LD		Table Analyzed	Ovserved-ASVs	Ovserved-ASVs	Ovserved-ASVs	Shannon Index	Shannon Index	Shannon Index	Pielou's evenness index	Pielou's evenness index	Pielou's evenness index
rectum_1B	rectum	1	256	7.23497	0.903638	LD Rectum
rectum_2B	rectum	2	259	7.12943	0.890555	LD Rectum		Column B	non LD-Oral cavity	non LD-Vagina	non LD-Rectum	non LD-Oral cavity	non LD-Rectum	non LD-Vagina	non LD-Oral cavity	non LD-Rectum	non LD-Vagina
rectum_3B	rectum	3	280	7.27901	0.896401	LD Rectum		vs.	vs.	vs.	vs.	vs.	vs.	vs.	vs.	vs.	vs.
rectum_5B	rectum	5	159	6.40569	0.874797	LD Rectum		Column A	LD-Oral cavity	LD-Vagina	LD-Rectum	LD-Oral cavity	LD-Rectum	LD-Vagina	LD-Oral cavity	LD-Rectum	LD-Vagina
rectum_7B	rectum	7	247	7.4962	0.943729	LD Rectum
rectum_9B	rectum	9	196	7.00163	0.919989	LD Rectum		Mann Whitney test
rectum_11B	rectum	11	201	6.92029	0.905091	LD Rectum		P value	0.4058	0.1796	0.6119	0.9773	0.6288	0.0055	0.028	0.3978	0.0042
rectum_12B	rectum	12	137	5.82492	0.818843	LD Rectum		Exact or approximate P value?	Exact	Exact	Exact	Exact	Exact	Exact	Exact	Exact	Exact
rectum_13B	rectum	13	249	7.20548	0.904865	LD Rectum		P value summary	ns	ns	ns	ns	ns	**	*	ns	**
rectum_14B	rectum	14	237	7.24157	0.918481	LD Rectum		Significantly different (P < 0.05)?	No	No	No	No	No	Yes	Yes	No	Yes
rectum_15B	rectum	15	154	6.45485	0.888987	LD Rectum		One- or two-tailed P value?	Two-tailed	Two-tailed	Two-tailed	Two-tailed	Two-tailed	Two-tailed	Two-tailed	Two-tailed	Two-tailed
rectum_16B	rectum	16	162	6.32105	0.860676	LD Rectum		Sum of ranks in column A,B	1313 , 398	1286.5 , 424.50	1384 , 327	1359 , 352	1383 , 328	1215 , 496	1471 , 240	1402 , 309	1211 , 500
rectum_17B	rectum	17	206	6.00939	0.782949	LD Rectum		Mann-Whitney U	232	205.5	249	274	250	134	162	231	130
rectum_18B	rectum	18	332	7.83487	0.934563	LD Rectum
rectum_19B	rectum	19	162	6.3281	0.859622	LD Rectum		Difference between medians
rectum_21B	rectum	21	221	6.99082	0.899611	LD Rectum		Median of column A	337.50, n=46	23.500, n=46	260.00, n=46	7.8576, n=46	6.9779, n=46	2.6508, n=46	0.93101, n=46	0.88820, n=46	0.58879, n=46
rectum_23B	rectum	23	293	7.51959	0.917038	LD Rectum		Median of column B	358.50, n=12	24.500, n=12	251.00, n=12	7.7882, n=12	6.9406, n=12	3.0174, n=12	0.91611, n=12	0.86792, n=12	0.70089, n=12
rectum_28B	rectum	28	266	7.17506	0.890712	LD Rectum		Difference: Actual	21	1	-9	-0.069394	-0.037315	0.36661	-0.014903	-0.020276	0.1121
rectum_29B	rectum	29	194	5.22477	0.687366	LD Rectum		Difference: Hodges-Lehmann	24	6	-9.5	-0.0067141	-0.11991	0.66552	-0.01403	-0.012424	0.1133
rectum_30B	rectum	30	247	6.85128	0.858159	LD Rectum
rectum_31B	rectum	31	144	6.45038	0.899421	LD Rectum
rectum_34B	rectum	34	281	7.58511	0.931151	LD Rectum
rectum_37B	rectum	37	282	7.5167	0.923551	LD Rectum
rectum_38B	rectum	38	352	7.74994	0.91573	LD Rectum
rectum_39B	rectum	39	303	7.32111	0.891629	LD Rectum
rectum_40B	rectum	40	266	6.53467	0.816158	LD Rectum
rectum_43B	rectum	43	216	6.3498	0.815145	LD Rectum
rectum_45B	rectum	45	208	6.89657	0.893696	LD Rectum
rectum_46B	rectum	46	302	7.23218	0.877643	LD Rectum
rectum_47B	rectum	47	115	5.80459	0.847467	LD Rectum
rectum_48B	rectum	48	280	6.94039	0.854046	LD Rectum
rectum_50B	rectum	50	376	8.07313	0.94492	LD Rectum
rectum_55B	rectum	55	276	6.96501	0.862223	LD Rectum
rectum_59B	rectum	59	314	6.56313	0.794886	LD Rectum
rectum_60B	rectum	60	285	7.29319	0.895696	LD Rectum
rectum_63B	rectum	63	181	4.39381	0.584678	LD Rectum
rectum_65B	rectum	65	470	7.88258	0.888365	LD Rectum
rectum_67B	rectum	67	336	7.45057	0.88549	LD Rectum
rectum_68B	rectum	68	349	7.43516	0.881058	LD Rectum
rectum_69B	rectum	69	70	3.48235	0.565581	LD Rectum
rectum_70B	rectum	70	261	6.83428	0.850824	LD Rectum
rectum_71B	rectum	71	188	6.02684	0.796454	LD Rectum
rectum_72B	rectum	72	270	6.68114	0.830683	LD Rectum
rectum_73B	rectum	73	302	6.84187	0.829497	LD Rectum
rectum_75B	rectum	75	416	7.89453	0.907155	LD Rectum
rectum_79B	rectum	79	418	7.75408	0.888031	LD Rectum
rectum_10B	rectum	10	259	7.38042	0.921603	non-LD Rectum
rectum_22B	rectum	22	180	6.42066	0.857099	non-LD Rectum
rectum_24B	rectum	24	251	6.99664	0.881287	non-LD Rectum
rectum_25B	rectum	25	240	6.74764	0.855856	non-LD Rectum
rectum_35B	rectum	35	245	6.91279	0.871843	non-LD Rectum
rectum_49B	rectum	49	186	6.12553	0.817099	non-LD Rectum
rectum_52B	rectum	52	144	6.17208	0.865203	non-LD Rectum
rectum_57B	rectum	57	288	6.8557	0.836891	non-LD Rectum
rectum_64B	rectum	64	375	7.62923	0.890844	non-LD Rectum
rectum_74B	rectum	74	265	6.99867	0.87064	non-LD Rectum
rectum_76B	rectum	76	280	6.96842	0.857422	non-LD Rectum
rectum_80B	rectum	80	251	7.11307	0.89129	non-LD Rectum
saliva_1B	saliva	1	325	7.77193	0.932486	LD Saliva
saliva_2B	saliva	2	305	7.82716	0.948346	LD Saliva
saliva_3B	saliva	3	385	7.95206	0.92618	LD Saliva
saliva_5B	saliva	5	331	7.84313	0.937388	LD Saliva
saliva_7B	saliva	7	261	7.48325	0.932702	LD Saliva
saliva_9B	saliva	9	364	8.09017	0.950754	LD Saliva
saliva_11B	saliva	11	438	8.17764	0.933168	LD Saliva
saliva_12B	saliva	12	251	7.31982	0.918263	LD Saliva
saliva_13B	saliva	13	281	7.69908	0.943994	LD Saliva
saliva_14B	saliva	14	264	7.65262	0.951217	LD Saliva
saliva_15B	saliva	15	284	7.62511	0.936077	LD Saliva
saliva_16B	saliva	16	266	7.61356	0.945645	LD Saliva
saliva_17B	saliva	17	314	7.72563	0.929907	LD Saliva
saliva_18B	saliva	18	273	7.39403	0.913732	LD Saliva
saliva_19B	saliva	19	354	7.79971	0.921278	LD Saliva
saliva_21B	saliva	21	367	7.97555	0.935915	LD Saliva
saliva_23B	saliva	23	393	7.93588	0.921995	LD Saliva
saliva_28B	saliva	28	303	7.70952	0.934591	LD Saliva
saliva_29B	saliva	29	249	7.00534	0.87976	LD Saliva
saliva_30B	saliva	30	331	7.90976	0.94591	LD Saliva
saliva_31B	saliva	31	262	7.39608	0.919655	LD Saliva
saliva_34B	saliva	34	325	7.9672	0.955693	LD Saliva
saliva_37B	saliva	37	316	7.87207	0.94758	LD Saliva
saliva_38B	saliva	38	384	8.04331	0.939041	LD Saliva
saliva_39B	saliva	39	328	7.72762	0.924737	LD Saliva
saliva_40B	saliva	40	274	7.53674	0.930684	LD Saliva
saliva_43B	saliva	43	336	7.78749	0.927287	LD Saliva
saliva_45B	saliva	45	385	8.00288	0.931342	LD Saliva
saliva_46B	saliva	46	339	7.89022	0.940243	LD Saliva
saliva_47B	saliva	47	301	7.72435	0.937725	LD Saliva
saliva_48B	saliva	48	359	8.00496	0.944599	LD Saliva
saliva_50B	saliva	50	287	7.20215	0.879067	LD Saliva
saliva_55B	saliva	55	378	7.87728	0.918436	LD Saliva
saliva_59B	saliva	59	423	7.89407	0.908015	LD Saliva
saliva_60B	saliva	60	405	7.96017	0.920238	LD Saliva
saliva_63B	saliva	63	389	7.7559	0.903726	LD Saliva
saliva_65B	saliva	65	422	8.20295	0.938619	LD Saliva
saliva_67B	saliva	67	434	8.13418	0.928086	LD Saliva
saliva_68B	saliva	68	361	7.74023	0.909953	LD Saliva
saliva_69B	saliva	69	292	7.32528	0.894528	LD Saliva
saliva_70B	saliva	70	507	8.30903	0.92469	LD Saliva
saliva_71B	saliva	71	434	8.03439	0.919121	LD Saliva
saliva_72B	saliva	72	455	8.21417	0.932089	LD Saliva
saliva_73B	saliva	73	454	8.1856	0.925033	LD Saliva
saliva_75B	saliva	75	609	8.64802	0.936235	LD Saliva
saliva_79B	saliva	79	421	8.07976	0.92586	LD Saliva
saliva_10B	saliva	10	239	6.9959	0.883497	non-LD Saliva
saliva_22B	saliva	22	399	8.06705	0.935585	non-LD Saliva
saliva_24B	saliva	24	363	7.9811	0.940849	non-LD Saliva
saliva_25B	saliva	25	288	7.41182	0.906791	non-LD Saliva
saliva_35B	saliva	35	340	7.73729	0.918564	non-LD Saliva
saliva_49B	saliva	49	299	7.7308	0.941071	non-LD Saliva
saliva_52B	saliva	52	316	7.32809	0.881786	non-LD Saliva
saliva_57B	saliva	57	549	8.45217	0.928809	non-LD Saliva
saliva_64B	saliva	64	614	8.52461	0.919957	non-LD Saliva
saliva_74B	saliva	74	515	8.24097	0.913656	non-LD Saliva
saliva_76B	saliva	76	391	7.83913	0.906849	non-LD Saliva
saliva_80B	saliva	80	354	7.42134	0.87323	non-LD Saliva
vagina_1B	vagina	1	15	2.84325	0.72574	LD Vagina
vagina_2B	vagina	2	18	3.04622	0.726841	LD Vagina
vagina_3B	vagina	3	24	2.89189	0.628631	LD Vagina
vagina_5B	vagina	5	13	2.01991	0.562235	LD Vagina
vagina_7B	vagina	7	9	2.31692	0.729464	LD Vagina
vagina_9B	vagina	9	35	3.08942	0.591593	LD Vagina
vagina_11B	vagina	11	27	2.83836	0.582628	LD Vagina
vagina_12B	vagina	12	18	1.93641	0.46404	LD Vagina
vagina_13B	vagina	13	22	2.95241	0.660734	LD Vagina
vagina_14B	vagina	14	33	3.13191	0.616031	LD Vagina
vagina_15B	vagina	15	10	2.2534	0.679998	LD Vagina
vagina_16B	vagina	16	14	2.60838	0.686271	LD Vagina
vagina_17B	vagina	17	9	1.98231	0.573073	LD Vagina
vagina_18B	vagina	18	13	2.17622	0.585182	LD Vagina
vagina_19B	vagina	19	37	2.27949	0.425584	LD Vagina
vagina_21B	vagina	21	29	2.39411	0.492158	LD Vagina
vagina_23B	vagina	23	75	3.07537	0.495945	LD Vagina
vagina_28B	vagina	28	49	2.46835	0.438841	LD Vagina
vagina_29B	vagina	29	24	3.1372	0.685014	LD Vagina
vagina_30B	vagina	30	25	2.21212	0.474744	LD Vagina
vagina_31B	vagina	31	37	2.85053	0.539667	LD Vagina
vagina_34B	vagina	34	13	2.30407	0.618319	LD Vagina
vagina_37B	vagina	37	27	2.73679	0.568489	LD Vagina
vagina_38B	vagina	38	69	2.65551	0.431328	LD Vagina
vagina_39B	vagina	39	22	2.2973	0.514096	LD Vagina
vagina_40B	vagina	40	21	2.01027	0.451273	LD Vagina
vagina_43B	vagina	43	27	2.1424	0.449851	LD Vagina
vagina_45B	vagina	45	23	3.15689	0.6971	LD Vagina
vagina_46B	vagina	46	16	1.99564	0.500088	LD Vagina
vagina_47B	vagina	47	33	3.22388	0.64473	LD Vagina
vagina_48B	vagina	48	41	3.21587	0.599379	LD Vagina
vagina_50B	vagina	50	81	3.7294	0.585996	LD Vagina
vagina_55B	vagina	55	17	1.91068	0.470169	LD Vagina
vagina_59B	vagina	59	24	2.64615	0.557216	LD Vagina
vagina_60B	vagina	60	8	1.85811	0.660279	LD Vagina
vagina_63B	vagina	63	27	2.63961	0.53904	LD Vagina
vagina_65B	vagina	65	14	2.82693	0.744744	LD Vagina
vagina_67B	vagina	67	14	2.46793	0.629451	LD Vagina
vagina_68B	vagina	68	40	2.81526	0.53281	LD Vagina
vagina_69B	vagina	69	25	3.12018	0.666459	LD Vagina
vagina_70B	vagina	70	18	3.15486	0.77446	LD Vagina
vagina_71B	vagina	71	21	2.80097	0.639112	LD Vagina
vagina_72B	vagina	72	10	2.07771	0.660674	LD Vagina
vagina_73B	vagina	73	32	3.1312	0.624039	LD Vagina
vagina_75B	vagina	75	19	2.18076	0.515369	LD Vagina
vagina_79B	vagina	79	26	3.16537	0.681202	LD Vagina
vagina_10B	vagina	10	58	4.75801	0.807184	non-LD Vagina
vagina_22B	vagina	22	77	5.23952	0.835675	non-LD Vagina
vagina_24B	vagina	24	63	4.14251	0.688711	non-LD Vagina
vagina_25B	vagina	25	22	2.89298	0.658009	non-LD Vagina
vagina_35B	vagina	35	26	2.09134	0.445589	non-LD Vagina
vagina_49B	vagina	49	23	3.08886	0.683039	non-LD Vagina
vagina_52B	vagina	52	16	2.91792	0.713073	non-LD Vagina
vagina_57B	vagina	57	14	2.94601	0.776637	non-LD Vagina
vagina_64B	vagina	64	59	4.56344	0.777115	non-LD Vagina
vagina_74B	vagina	74	19	3.28985	0.773181	non-LD Vagina
vagina_76B	vagina	76	51	2.77038	0.482518	non-LD Vagina
vagina_80B	vagina	80	20	2.79197	0.644644	non-LD Vagina

## Sheet: FIG2G
to non-LD Vagina		LD Rectum		to non-LD Vagina		non-LD Rectum		to non-LD Vagina		LD Vagina		to non-LD Vagina		non-LD Vagina
SubjectID1	SubjectID2	Distance		SubjectID1	SubjectID2	Distance		SubjectID1	SubjectID2	Distance		SubjectID1	SubjectID2	Distance		Table Analyzed	LD vagina rectum
vagina_10B	rectum_1B	0.95464		vagina_10B	rectum_10B	0.92544		vagina_10B	vagina_1B	1		vagina_22B	vagina_10B	0.75928
vagina_10B	rectum_2B	0.96776		vagina_10B	rectum_22B	0.8216		vagina_10B	vagina_2B	0.99872		vagina_24B	vagina_10B	0.98808		Kruskal-Wallis test
vagina_10B	rectum_3B	0.95008		vagina_10B	rectum_24B	0.87432		vagina_10B	vagina_3B	0.99872		vagina_24B	vagina_22B	0.90072		P value	<0.0001
vagina_10B	rectum_5B	0.8692		vagina_10B	rectum_25B	0.99112		vagina_10B	vagina_5B	0.79712		vagina_25B	vagina_10B	0.99432		Exact or approximate P value?	Approximate
vagina_10B	rectum_7B	0.98792		vagina_10B	rectum_35B	0.97208		vagina_10B	vagina_7B	0.79672		vagina_25B	vagina_22B	0.90624		P value summary	****
vagina_10B	rectum_9B	0.79192		vagina_10B	rectum_49B	0.72136		vagina_10B	vagina_9B	0.88432		vagina_25B	vagina_24B	0.60848		Do the medians vary signif. (P < 0.05)?	Yes
vagina_10B	rectum_11B	0.97616		vagina_10B	rectum_52B	0.91904		vagina_10B	vagina_11B	0.79672		vagina_35B	vagina_10B	0.99872		Number of groups	4
vagina_10B	rectum_12B	0.6788		vagina_10B	rectum_57B	0.73328		vagina_10B	vagina_12B	0.798		vagina_35B	vagina_22B	0.99936		Kruskal-Wallis statistic	74.422
vagina_10B	rectum_13B	0.99608		vagina_10B	rectum_64B	0.86984		vagina_10B	vagina_13B	0.954		vagina_35B	vagina_24B	0.9516
vagina_10B	rectum_14B	0.99		vagina_10B	rectum_74B	0.99952		vagina_10B	vagina_14B	0.80656		vagina_35B	vagina_25B	0.9916		Data summary
vagina_10B	rectum_15B	0.94504		vagina_10B	rectum_76B	0.91768		vagina_10B	vagina_15B	0.79672		vagina_49B	vagina_10B	0.76888		Number of treatments (columns)	4
vagina_10B	rectum_16B	0.86096		vagina_10B	rectum_80B	0.9652		vagina_10B	vagina_16B	0.99352		vagina_49B	vagina_22B	0.81904		Number of values (total)	1314
vagina_10B	rectum_17B	0.80048		vagina_22B	rectum_10B	0.93448		vagina_10B	vagina_17B	0.79672		vagina_49B	vagina_24B	0.90968
vagina_10B	rectum_18B	0.99352		vagina_22B	rectum_22B	0.69552		vagina_10B	vagina_18B	0.79672		vagina_49B	vagina_25B	0.91496		Dunn's multiple comparisons test	Mean rank diff.	Significant?	Summary	Adjusted P Value	D-?
vagina_10B	rectum_19B	0.90056		vagina_22B	rectum_24B	0.8208		vagina_10B	vagina_19B	0.99872		vagina_49B	vagina_35B	0.99744		nonLD-Vagina vs. LD-Rectum	-282.585	Yes	****	<0.0001	A	LD-Rectum
vagina_10B	rectum_21B	0.98592		vagina_22B	rectum_25B	0.97016		vagina_10B	vagina_21B	0.99728		vagina_52B	vagina_10B	0.90264		nonLD-Vagina vs. nonLD-Rectum	-113.354	No	ns	0.1331	B	nonLD-Rectum
vagina_10B	rectum_23B	0.96472		vagina_22B	rectum_35B	0.95384		vagina_10B	vagina_23B	0.94616		vagina_52B	vagina_22B	0.65104		nonLD-Vagina vs. LD-Vagina	-334.223	Yes	****	<0.0001	C	LD-Vagina
vagina_10B	rectum_28B	0.9608		vagina_22B	rectum_49B	0.79904		vagina_10B	vagina_28B	0.994		vagina_52B	vagina_24B	0.62904
vagina_10B	rectum_29B	0.75024		vagina_22B	rectum_52B	0.8876		vagina_10B	vagina_29B	0.90608		vagina_52B	vagina_25B	0.56008
vagina_10B	rectum_30B	0.99424		vagina_22B	rectum_57B	0.83936		vagina_10B	vagina_30B	0.99872		vagina_52B	vagina_35B	0.99968
vagina_10B	rectum_31B	0.86752		vagina_22B	rectum_64B	0.86232		vagina_10B	vagina_31B	0.80728		vagina_52B	vagina_49B	0.9172
vagina_10B	rectum_34B	0.98992		vagina_22B	rectum_74B	0.99448		vagina_10B	vagina_34B	0.798		vagina_57B	vagina_10B	0.79936
vagina_10B	rectum_37B	0.97136		vagina_22B	rectum_76B	0.94024		vagina_10B	vagina_37B	0.99856		vagina_57B	vagina_22B	0.8228
vagina_10B	rectum_38B	0.98096		vagina_22B	rectum_80B	0.89824		vagina_10B	vagina_38B	0.79672		vagina_57B	vagina_24B	0.61976
vagina_10B	rectum_39B	0.99296		vagina_24B	rectum_10B	0.99232		vagina_10B	vagina_39B	0.99824		vagina_57B	vagina_25B	0.54664
vagina_10B	rectum_40B	0.95816		vagina_24B	rectum_22B	0.90808		vagina_10B	vagina_40B	0.79672		vagina_57B	vagina_35B	0.99968
vagina_10B	rectum_43B	0.91248		vagina_24B	rectum_24B	0.7112		vagina_10B	vagina_43B	0.99784		vagina_57B	vagina_49B	0.39064
vagina_10B	rectum_45B	0.89088		vagina_24B	rectum_25B	0.81224		vagina_10B	vagina_45B	0.99856		vagina_57B	vagina_52B	0.54904
vagina_10B	rectum_46B	0.98992		vagina_24B	rectum_35B	0.99848		vagina_10B	vagina_46B	0.99872		vagina_64B	vagina_10B	0.59496
vagina_10B	rectum_47B	0.83976		vagina_24B	rectum_49B	0.91072		vagina_10B	vagina_47B	0.99872		vagina_64B	vagina_22B	0.63632
vagina_10B	rectum_48B	0.98056		vagina_24B	rectum_52B	0.90536		vagina_10B	vagina_48B	0.99872		vagina_64B	vagina_24B	0.97272
vagina_10B	rectum_50B	0.98736		vagina_24B	rectum_57B	0.95656		vagina_10B	vagina_50B	0.99696		vagina_64B	vagina_25B	0.98176
vagina_10B	rectum_55B	0.97432		vagina_24B	rectum_64B	0.97208		vagina_10B	vagina_55B	0.99856		vagina_64B	vagina_35B	1
vagina_10B	rectum_59B	0.99872		vagina_24B	rectum_74B	0.99816		vagina_10B	vagina_59B	0.998		vagina_64B	vagina_49B	0.85184
vagina_10B	rectum_60B	0.98016		vagina_24B	rectum_76B	0.97056		vagina_10B	vagina_60B	0.9988		vagina_64B	vagina_52B	0.66568
vagina_10B	rectum_63B	0.77072		vagina_24B	rectum_80B	0.99904		vagina_10B	vagina_63B	0.68088		vagina_64B	vagina_57B	0.9276
vagina_10B	rectum_65B	0.99832		vagina_25B	rectum_10B	0.99456		vagina_10B	vagina_65B	0.99984		vagina_74B	vagina_10B	0.8244
vagina_10B	rectum_67B	0.99816		vagina_25B	rectum_22B	0.95392		vagina_10B	vagina_67B	0.99872		vagina_74B	vagina_22B	0.82656
vagina_10B	rectum_68B	0.9944		vagina_25B	rectum_24B	0.876		vagina_10B	vagina_68B	0.97256		vagina_74B	vagina_24B	0.62896
vagina_10B	rectum_69B	0.80472		vagina_25B	rectum_25B	0.96424		vagina_10B	vagina_69B	0.8028		vagina_74B	vagina_25B	0.4452
vagina_10B	rectum_70B	0.72184		vagina_25B	rectum_35B	0.99848		vagina_10B	vagina_70B	0.58048		vagina_74B	vagina_35B	0.9996
vagina_10B	rectum_71B	0.77008		vagina_25B	rectum_49B	0.96816		vagina_10B	vagina_71B	0.80856		vagina_74B	vagina_49B	0.746
vagina_10B	rectum_72B	0.76328		vagina_25B	rectum_52B	0.97016		vagina_10B	vagina_72B	0.7976		vagina_74B	vagina_52B	0.54448
vagina_10B	rectum_73B	0.97096		vagina_25B	rectum_57B	0.96376		vagina_10B	vagina_73B	0.69736		vagina_74B	vagina_57B	0.364
vagina_10B	rectum_75B	0.99656		vagina_25B	rectum_64B	0.98864		vagina_10B	vagina_75B	0.99976		vagina_74B	vagina_64B	0.93336
vagina_10B	rectum_79B	0.9628		vagina_25B	rectum_74B	0.99816		vagina_10B	vagina_79B	0.99672		vagina_76B	vagina_10B	0.99352
vagina_22B	rectum_1B	0.91304		vagina_25B	rectum_76B	0.98056		vagina_22B	vagina_1B	1		vagina_76B	vagina_22B	0.99384
vagina_22B	rectum_2B	0.95976		vagina_25B	rectum_80B	1		vagina_22B	vagina_2B	0.99936		vagina_76B	vagina_24B	0.91048
vagina_22B	rectum_3B	0.92056		vagina_35B	rectum_10B	0.99944		vagina_22B	vagina_3B	0.99936		vagina_76B	vagina_25B	0.98008
vagina_22B	rectum_5B	0.93928		vagina_35B	rectum_22B	0.99024		vagina_22B	vagina_5B	0.99936		vagina_76B	vagina_35B	0.9916
vagina_22B	rectum_7B	0.95776		vagina_35B	rectum_24B	0.976		vagina_22B	vagina_7B	0.99936		vagina_76B	vagina_49B	0.99216
vagina_22B	rectum_9B	0.74704		vagina_35B	rectum_25B	0.99112		vagina_22B	vagina_9B	0.78856		vagina_76B	vagina_52B	0.99768
vagina_22B	rectum_11B	0.92136		vagina_35B	rectum_35B	0.99848		vagina_22B	vagina_11B	0.99936		vagina_76B	vagina_57B	0.9904
vagina_22B	rectum_12B	0.90656		vagina_35B	rectum_49B	0.99128		vagina_22B	vagina_12B	1		vagina_76B	vagina_64B	0.99392
vagina_22B	rectum_13B	0.97096		vagina_35B	rectum_52B	0.9916		vagina_22B	vagina_13B	0.97592		vagina_76B	vagina_74B	0.9996
vagina_22B	rectum_14B	0.98192		vagina_35B	rectum_57B	0.98888		vagina_22B	vagina_14B	0.91896		vagina_80B	vagina_10B	0.99384
vagina_22B	rectum_15B	0.98792		vagina_35B	rectum_64B	0.9948		vagina_22B	vagina_15B	0.99936		vagina_80B	vagina_22B	0.97408
vagina_22B	rectum_16B	0.95736		vagina_35B	rectum_74B	0.99816		vagina_22B	vagina_16B	0.99384		vagina_80B	vagina_24B	0.98128
vagina_22B	rectum_17B	0.97192		vagina_35B	rectum_76B	0.9916		vagina_22B	vagina_17B	0.99936		vagina_80B	vagina_25B	0.99952
vagina_22B	rectum_18B	0.99768		vagina_35B	rectum_80B	1		vagina_22B	vagina_18B	0.99936		vagina_80B	vagina_35B	0.99952
vagina_22B	rectum_19B	0.94368		vagina_49B	rectum_10B	0.98984		vagina_22B	vagina_19B	0.99936		vagina_80B	vagina_49B	0.912
vagina_22B	rectum_21B	0.96368		vagina_49B	rectum_22B	0.92368		vagina_22B	vagina_21B	0.99936		vagina_80B	vagina_52B	0.99864
vagina_22B	rectum_23B	0.94496		vagina_49B	rectum_24B	0.91616		vagina_22B	vagina_23B	0.9224		vagina_80B	vagina_57B	0.98808
vagina_22B	rectum_28B	0.93304		vagina_49B	rectum_25B	0.98496		vagina_22B	vagina_28B	0.95712		vagina_80B	vagina_64B	0.93464
vagina_22B	rectum_29B	0.60504		vagina_49B	rectum_35B	0.99848		vagina_22B	vagina_29B	0.74384		vagina_80B	vagina_74B	1
vagina_22B	rectum_30B	0.98304		vagina_49B	rectum_49B	0.6528		vagina_22B	vagina_30B	0.99936		vagina_80B	vagina_76B	0.96576
vagina_22B	rectum_31B	0.80736		vagina_49B	rectum_52B	0.98696		vagina_22B	vagina_31B	0.91944
vagina_22B	rectum_34B	0.99112		vagina_49B	rectum_57B	0.87472		vagina_22B	vagina_34B	1
vagina_22B	rectum_37B	0.95768		vagina_49B	rectum_64B	0.9652		vagina_22B	vagina_37B	0.99808
vagina_22B	rectum_38B	0.97528		vagina_49B	rectum_74B	1		vagina_22B	vagina_38B	0.99936
vagina_22B	rectum_39B	0.97736		vagina_49B	rectum_76B	0.99568		vagina_22B	vagina_39B	0.99936
vagina_22B	rectum_40B	0.96768		vagina_49B	rectum_80B	0.99904		vagina_22B	vagina_40B	0.99936
vagina_22B	rectum_43B	0.95312		vagina_52B	rectum_10B	0.99512		vagina_22B	vagina_43B	0.99936
vagina_22B	rectum_45B	0.78072		vagina_52B	rectum_22B	0.87504		vagina_22B	vagina_45B	0.99936
vagina_22B	rectum_46B	0.96744		vagina_52B	rectum_24B	0.89552		vagina_22B	vagina_46B	0.99936
vagina_22B	rectum_47B	0.93992		vagina_52B	rectum_25B	0.98736		vagina_22B	vagina_47B	0.99936
vagina_22B	rectum_48B	0.9596		vagina_52B	rectum_35B	0.99968		vagina_22B	vagina_48B	0.99936
vagina_22B	rectum_50B	0.98392		vagina_52B	rectum_49B	0.98736		vagina_22B	vagina_50B	0.99936
vagina_22B	rectum_55B	0.95792		vagina_52B	rectum_52B	0.93824		vagina_22B	vagina_55B	0.99936
vagina_22B	rectum_59B	0.99824		vagina_52B	rectum_57B	0.97944		vagina_22B	vagina_59B	0.98472
vagina_22B	rectum_60B	0.98928		vagina_52B	rectum_64B	0.95392		vagina_22B	vagina_60B	0.99936
vagina_22B	rectum_63B	0.97912		vagina_52B	rectum_74B	1		vagina_22B	vagina_63B	0.89968
vagina_22B	rectum_65B	0.98264		vagina_52B	rectum_76B	0.99768		vagina_22B	vagina_65B	0.99984
vagina_22B	rectum_67B	0.99328		vagina_52B	rectum_80B	1		vagina_22B	vagina_67B	0.99936
vagina_22B	rectum_68B	0.99032		vagina_57B	rectum_10B	0.99096		vagina_22B	vagina_68B	0.98408
vagina_22B	rectum_69B	0.91568		vagina_57B	rectum_22B	0.93144		vagina_22B	vagina_69B	0.91592
vagina_22B	rectum_70B	0.66712		vagina_57B	rectum_24B	0.8892		vagina_22B	vagina_70B	0.90576
vagina_22B	rectum_71B	0.83472		vagina_57B	rectum_25B	0.98736		vagina_22B	vagina_71B	0.92008
vagina_22B	rectum_72B	0.95256		vagina_57B	rectum_35B	1		vagina_22B	vagina_72B	0.9996
vagina_22B	rectum_73B	0.98192		vagina_57B	rectum_49B	0.68344		vagina_22B	vagina_73B	0.74392
vagina_22B	rectum_75B	0.99136		vagina_57B	rectum_52B	0.98936		vagina_22B	vagina_75B	0.99976
vagina_22B	rectum_79B	0.94784		vagina_57B	rectum_57B	0.8744		vagina_22B	vagina_79B	0.99888
vagina_24B	rectum_1B	0.95872		vagina_57B	rectum_64B	0.97336		vagina_24B	vagina_1B	1
vagina_24B	rectum_2B	0.97928		vagina_57B	rectum_74B	0.99968		vagina_24B	vagina_2B	0.99688
vagina_24B	rectum_3B	0.83848		vagina_57B	rectum_76B	0.99728		vagina_24B	vagina_3B	0.98968
vagina_24B	rectum_5B	0.93336		vagina_57B	rectum_80B	0.99904		vagina_24B	vagina_5B	0.99712
vagina_24B	rectum_7B	1		vagina_64B	rectum_10B	0.98168		vagina_24B	vagina_7B	0.99208
vagina_24B	rectum_9B	0.97296		vagina_64B	rectum_22B	0.82424		vagina_24B	vagina_9B	0.97312
vagina_24B	rectum_11B	0.95584		vagina_64B	rectum_24B	0.96424		vagina_24B	vagina_11B	0.96944
vagina_24B	rectum_12B	0.99248		vagina_64B	rectum_25B	0.98768		vagina_24B	vagina_12B	0.99296
vagina_24B	rectum_13B	1		vagina_64B	rectum_35B	0.9896		vagina_24B	vagina_13B	0.99576
vagina_24B	rectum_14B	0.9968		vagina_64B	rectum_49B	0.9068		vagina_24B	vagina_14B	0.98024
vagina_24B	rectum_15B	0.99304		vagina_64B	rectum_52B	0.93376		vagina_24B	vagina_15B	0.99616
vagina_24B	rectum_16B	0.9904		vagina_64B	rectum_57B	0.9292		vagina_24B	vagina_16B	0.97672
vagina_24B	rectum_17B	0.99512		vagina_64B	rectum_64B	0.81872		vagina_24B	vagina_17B	0.99176
vagina_24B	rectum_18B	0.99704		vagina_64B	rectum_74B	1		vagina_24B	vagina_18B	0.98656
vagina_24B	rectum_19B	0.97216		vagina_64B	rectum_76B	0.98952		vagina_24B	vagina_19B	0.98072
vagina_24B	rectum_21B	0.99648		vagina_64B	rectum_80B	0.9924		vagina_24B	vagina_21B	0.93528
vagina_24B	rectum_23B	0.98488		vagina_74B	rectum_10B	0.99232		vagina_24B	vagina_23B	0.93008
vagina_24B	rectum_28B	0.98392		vagina_74B	rectum_22B	0.93136		vagina_24B	vagina_28B	0.94048
vagina_24B	rectum_29B	0.67456		vagina_74B	rectum_24B	0.89544		vagina_24B	vagina_29B	0.99728
vagina_24B	rectum_30B	0.9804		vagina_74B	rectum_25B	0.98728		vagina_24B	vagina_30B	0.99008
vagina_24B	rectum_31B	0.97944		vagina_74B	rectum_35B	0.9996		vagina_24B	vagina_31B	0.99256
vagina_24B	rectum_34B	0.99608		vagina_74B	rectum_49B	0.81616		vagina_24B	vagina_34B	0.99472
vagina_24B	rectum_37B	0.9948		vagina_74B	rectum_52B	0.98928		vagina_24B	vagina_37B	0.99384
vagina_24B	rectum_38B	0.99192		vagina_74B	rectum_57B	0.88016		vagina_24B	vagina_38B	0.94728
vagina_24B	rectum_39B	0.99168		vagina_74B	rectum_64B	0.98232		vagina_24B	vagina_39B	0.99376
vagina_24B	rectum_40B	0.9968		vagina_74B	rectum_74B	1		vagina_24B	vagina_40B	0.99488
vagina_24B	rectum_43B	0.88056		vagina_74B	rectum_76B	0.9996		vagina_24B	vagina_43B	0.99328
vagina_24B	rectum_45B	0.92168		vagina_74B	rectum_80B	1		vagina_24B	vagina_45B	0.99184
vagina_24B	rectum_46B	0.93128		vagina_76B	rectum_10B	0.9968		vagina_24B	vagina_46B	0.99296
vagina_24B	rectum_47B	0.98408		vagina_76B	rectum_22B	0.93416		vagina_24B	vagina_47B	0.98216
vagina_24B	rectum_48B	0.9956		vagina_76B	rectum_24B	0.92896		vagina_24B	vagina_48B	0.98016
vagina_24B	rectum_50B	0.99904		vagina_76B	rectum_25B	0.93184		vagina_24B	vagina_50B	0.8372
vagina_24B	rectum_55B	0.99504		vagina_76B	rectum_35B	0.99848		vagina_24B	vagina_55B	0.99696
vagina_24B	rectum_59B	0.70456		vagina_76B	rectum_49B	0.93208		vagina_24B	vagina_59B	0.99576
vagina_24B	rectum_60B	0.99984		vagina_76B	rectum_52B	0.92352		vagina_24B	vagina_60B	0.9988
vagina_24B	rectum_63B	0.98624		vagina_76B	rectum_57B	0.97712		vagina_24B	vagina_63B	0.99632
vagina_24B	rectum_65B	0.99792		vagina_76B	rectum_64B	0.98376		vagina_24B	vagina_65B	0.99864
vagina_24B	rectum_67B	0.99936		vagina_76B	rectum_74B	0.99816		vagina_24B	vagina_67B	0.99872
vagina_24B	rectum_68B	0.998		vagina_76B	rectum_76B	0.87952		vagina_24B	vagina_68B	0.99832
vagina_24B	rectum_69B	0.98992		vagina_76B	rectum_80B	0.99848		vagina_24B	vagina_69B	0.98344
vagina_24B	rectum_70B	0.93024		vagina_80B	rectum_10B	0.99864		vagina_24B	vagina_70B	0.98528
vagina_24B	rectum_71B	0.9968		vagina_80B	rectum_22B	0.994		vagina_24B	vagina_71B	0.99952
vagina_24B	rectum_72B	0.97544		vagina_80B	rectum_24B	0.99296		vagina_24B	vagina_72B	0.99912
vagina_24B	rectum_73B	0.99856		vagina_80B	rectum_25B	0.99952		vagina_24B	vagina_73B	0.98816
vagina_24B	rectum_75B	0.99568		vagina_80B	rectum_35B	1		vagina_24B	vagina_75B	0.9988
vagina_24B	rectum_79B	0.99192		vagina_80B	rectum_49B	0.98552		vagina_24B	vagina_79B	0.99488
vagina_25B	rectum_1B	0.97352		vagina_80B	rectum_52B	0.99952		vagina_25B	vagina_1B	1
vagina_25B	rectum_2B	0.98176		vagina_80B	rectum_57B	0.99344		vagina_25B	vagina_2B	0.99688
vagina_25B	rectum_3B	0.96824		vagina_80B	rectum_64B	0.9784		vagina_25B	vagina_3B	0.98968
vagina_25B	rectum_5B	0.97464		vagina_80B	rectum_74B	0.99952		vagina_25B	vagina_5B	0.99464
vagina_25B	rectum_7B	1		vagina_80B	rectum_76B	0.99552		vagina_25B	vagina_7B	0.99208
vagina_25B	rectum_9B	0.97776		vagina_80B	rectum_80B	0.99904		vagina_25B	vagina_9B	0.97224
vagina_25B	rectum_11B	0.97896						vagina_25B	vagina_11B	0.97576
vagina_25B	rectum_12B	0.994						vagina_25B	vagina_12B	0.99472
vagina_25B	rectum_13B	1						vagina_25B	vagina_13B	0.99608
vagina_25B	rectum_14B	0.99792						vagina_25B	vagina_14B	0.65344
vagina_25B	rectum_15B	0.99496						vagina_25B	vagina_15B	0.99616
vagina_25B	rectum_16B	0.99176						vagina_25B	vagina_16B	0.65472
vagina_25B	rectum_17B	0.99568						vagina_25B	vagina_17B	0.99248
vagina_25B	rectum_18B	0.99704						vagina_25B	vagina_18B	0.98696
vagina_25B	rectum_19B	0.86296						vagina_25B	vagina_19B	0.64368
vagina_25B	rectum_21B	0.99632						vagina_25B	vagina_21B	0.63992
vagina_25B	rectum_23B	0.96736						vagina_25B	vagina_23B	0.61104
vagina_25B	rectum_28B	0.98568						vagina_25B	vagina_28B	0.94896
vagina_25B	rectum_29B	0.9356						vagina_25B	vagina_29B	0.65704
vagina_25B	rectum_30B	0.98136						vagina_25B	vagina_30B	0.99032
vagina_25B	rectum_31B	0.99688						vagina_25B	vagina_31B	0.99272
vagina_25B	rectum_34B	0.99744						vagina_25B	vagina_34B	0.99472
vagina_25B	rectum_37B	0.99656						vagina_25B	vagina_37B	0.99384
vagina_25B	rectum_38B	0.99176						vagina_25B	vagina_38B	0.98048
vagina_25B	rectum_39B	0.99136						vagina_25B	vagina_39B	0.99376
vagina_25B	rectum_40B	0.99648						vagina_25B	vagina_40B	0.99504
vagina_25B	rectum_43B	0.98008						vagina_25B	vagina_43B	0.65304
vagina_25B	rectum_45B	0.93584						vagina_25B	vagina_45B	0.99184
vagina_25B	rectum_46B	0.98048						vagina_25B	vagina_46B	0.99296
vagina_25B	rectum_47B	0.98896						vagina_25B	vagina_47B	0.98352
vagina_25B	rectum_48B	0.99576						vagina_25B	vagina_48B	0.98176
vagina_25B	rectum_50B	0.99968						vagina_25B	vagina_50B	0.98048
vagina_25B	rectum_55B	0.99568						vagina_25B	vagina_55B	0.99808
vagina_25B	rectum_59B	0.97872						vagina_25B	vagina_59B	0.656
vagina_25B	rectum_60B	0.99952						vagina_25B	vagina_60B	0.9988
vagina_25B	rectum_63B	0.9872						vagina_25B	vagina_63B	0.99904
vagina_25B	rectum_65B	0.99888						vagina_25B	vagina_65B	0.99864
vagina_25B	rectum_67B	0.99936						vagina_25B	vagina_67B	0.99872
vagina_25B	rectum_68B	0.99784						vagina_25B	vagina_68B	0.99832
vagina_25B	rectum_69B	0.65632						vagina_25B	vagina_69B	0.65976
vagina_25B	rectum_70B	0.9412						vagina_25B	vagina_70B	0.98568
vagina_25B	rectum_71B	0.99496						vagina_25B	vagina_71B	0.65928
vagina_25B	rectum_72B	0.98						vagina_25B	vagina_72B	0.9996
vagina_25B	rectum_73B	0.99824						vagina_25B	vagina_73B	0.99552
vagina_25B	rectum_75B	0.99536						vagina_25B	vagina_75B	0.9988
vagina_25B	rectum_79B	0.99224						vagina_25B	vagina_79B	0.65888
vagina_35B	rectum_1B	0.9916						vagina_35B	vagina_1B	1
vagina_35B	rectum_2B	0.9916						vagina_35B	vagina_2B	0.99688
vagina_35B	rectum_3B	0.9916						vagina_35B	vagina_3B	0.9916
vagina_35B	rectum_5B	0.9916						vagina_35B	vagina_5B	0.99744
vagina_35B	rectum_7B	1						vagina_35B	vagina_7B	0.99568
vagina_35B	rectum_9B	0.99944						vagina_35B	vagina_9B	0.99216
vagina_35B	rectum_11B	0.9916						vagina_35B	vagina_11B	0.9916
vagina_35B	rectum_12B	0.99856						vagina_35B	vagina_12B	0.99632
vagina_35B	rectum_13B	1						vagina_35B	vagina_13B	0.99736
vagina_35B	rectum_14B	0.99848						vagina_35B	vagina_14B	0.9916
vagina_35B	rectum_15B	0.99616						vagina_35B	vagina_15B	0.99736
vagina_35B	rectum_16B	0.99448						vagina_35B	vagina_16B	0.99656
vagina_35B	rectum_17B	0.99656						vagina_35B	vagina_17B	0.99456
vagina_35B	rectum_18B	0.99736						vagina_35B	vagina_18B	0.9916
vagina_35B	rectum_19B	0.99128						vagina_35B	vagina_19B	0.99128
vagina_35B	rectum_21B	0.99744						vagina_35B	vagina_21B	0.98512
vagina_35B	rectum_23B	0.99168						vagina_35B	vagina_23B	0.9916
vagina_35B	rectum_28B	0.9916						vagina_35B	vagina_28B	0.98544
vagina_35B	rectum_29B	0.98912						vagina_35B	vagina_29B	0.9968
vagina_35B	rectum_30B	0.99128						vagina_35B	vagina_30B	0.9916
vagina_35B	rectum_31B	0.99736						vagina_35B	vagina_31B	0.99272
vagina_35B	rectum_34B	0.99744						vagina_35B	vagina_34B	0.99592
vagina_35B	rectum_37B	0.99736						vagina_35B	vagina_37B	0.99392
vagina_35B	rectum_38B	0.99384						vagina_35B	vagina_38B	0.99024
vagina_35B	rectum_39B	0.99312						vagina_35B	vagina_39B	0.99608
vagina_35B	rectum_40B	0.9968						vagina_35B	vagina_40B	0.99504
vagina_35B	rectum_43B	0.99144						vagina_35B	vagina_43B	0.9932
vagina_35B	rectum_45B	0.99744						vagina_35B	vagina_45B	0.99304
vagina_35B	rectum_46B	0.98888						vagina_35B	vagina_46B	0.99304
vagina_35B	rectum_47B	0.99224						vagina_35B	vagina_47B	0.99128
vagina_35B	rectum_48B	0.9964						vagina_35B	vagina_48B	0.9916
vagina_35B	rectum_50B	1						vagina_35B	vagina_50B	0.98928
vagina_35B	rectum_55B	0.9964						vagina_35B	vagina_55B	0.99808
vagina_35B	rectum_59B	0.99056						vagina_35B	vagina_59B	0.99624
vagina_35B	rectum_60B	0.99984						vagina_35B	vagina_60B	0.9988
vagina_35B	rectum_63B	0.9916						vagina_35B	vagina_63B	0.99904
vagina_35B	rectum_65B	0.99968						vagina_35B	vagina_65B	0.9988
vagina_35B	rectum_67B	0.99936						vagina_35B	vagina_67B	0.99872
vagina_35B	rectum_68B	0.99912						vagina_35B	vagina_68B	0.99872
vagina_35B	rectum_69B	0.99656						vagina_35B	vagina_69B	1
vagina_35B	rectum_70B	0.99912						vagina_35B	vagina_70B	1
vagina_35B	rectum_71B	0.99688						vagina_35B	vagina_71B	0.99952
vagina_35B	rectum_72B	0.9916						vagina_35B	vagina_72B	0.9996
vagina_35B	rectum_73B	0.99856						vagina_35B	vagina_73B	0.9976
vagina_35B	rectum_75B	0.99568						vagina_35B	vagina_75B	0.9988
vagina_35B	rectum_79B	0.99408						vagina_35B	vagina_79B	0.99912
vagina_49B	rectum_1B	0.9908						vagina_49B	vagina_1B	0.99984
vagina_49B	rectum_2B	0.99744						vagina_49B	vagina_2B	0.99752
vagina_49B	rectum_3B	0.97504						vagina_49B	vagina_3B	0.99728
vagina_49B	rectum_5B	0.99376						vagina_49B	vagina_5B	0.99872
vagina_49B	rectum_7B	1						vagina_49B	vagina_7B	0.99744
vagina_49B	rectum_9B	0.9556						vagina_49B	vagina_9B	0.97272
vagina_49B	rectum_11B	0.99136						vagina_49B	vagina_11B	0.99728
vagina_49B	rectum_12B	0.99768						vagina_49B	vagina_12B	1
vagina_49B	rectum_13B	1						vagina_49B	vagina_13B	0.97424
vagina_49B	rectum_14B	0.99512						vagina_49B	vagina_14B	0.43744
vagina_49B	rectum_15B	1						vagina_49B	vagina_15B	0.99784
vagina_49B	rectum_16B	0.99688						vagina_49B	vagina_16B	0.99216
vagina_49B	rectum_17B	0.99744						vagina_49B	vagina_17B	0.99784
vagina_49B	rectum_18B	1						vagina_49B	vagina_18B	0.99744
vagina_49B	rectum_19B	0.99744						vagina_49B	vagina_19B	0.99744
vagina_49B	rectum_21B	0.99784						vagina_49B	vagina_21B	0.99584
vagina_49B	rectum_23B	0.99552						vagina_49B	vagina_23B	0.92032
vagina_49B	rectum_28B	0.99456						vagina_49B	vagina_28B	0.95552
vagina_49B	rectum_29B	0.8524						vagina_49B	vagina_29B	0.99744
vagina_49B	rectum_30B	0.99744						vagina_49B	vagina_30B	0.99728
vagina_49B	rectum_31B	0.92536						vagina_49B	vagina_31B	0.75112
vagina_49B	rectum_34B	0.99784						vagina_49B	vagina_34B	1
vagina_49B	rectum_37B	0.99592						vagina_49B	vagina_37B	0.99736
vagina_49B	rectum_38B	0.99744						vagina_49B	vagina_38B	0.99728
vagina_49B	rectum_39B	0.99744						vagina_49B	vagina_39B	0.99744
vagina_49B	rectum_40B	1						vagina_49B	vagina_40B	0.99744
vagina_49B	rectum_43B	0.99744						vagina_49B	vagina_43B	0.99744
vagina_49B	rectum_45B	0.85976						vagina_49B	vagina_45B	0.99728
vagina_49B	rectum_46B	0.99216						vagina_49B	vagina_46B	0.99744
vagina_49B	rectum_47B	0.9952						vagina_49B	vagina_47B	0.99744
vagina_49B	rectum_48B	0.99688						vagina_49B	vagina_48B	0.99728
vagina_49B	rectum_50B	0.99832						vagina_49B	vagina_50B	0.99728
vagina_49B	rectum_55B	0.99744						vagina_49B	vagina_55B	0.99824
vagina_49B	rectum_59B	0.99632						vagina_49B	vagina_59B	0.91584
vagina_49B	rectum_60B	1						vagina_49B	vagina_60B	0.9988
vagina_49B	rectum_63B	0.97928						vagina_49B	vagina_63B	0.908
vagina_49B	rectum_65B	0.99888						vagina_49B	vagina_65B	0.99928
vagina_49B	rectum_67B	1						vagina_49B	vagina_67B	0.99872
vagina_49B	rectum_68B	0.99816						vagina_49B	vagina_68B	0.9952
vagina_49B	rectum_69B	0.51368						vagina_49B	vagina_69B	0.54672
vagina_49B	rectum_70B	0.75752						vagina_49B	vagina_70B	0.58624
vagina_49B	rectum_71B	0.97888						vagina_49B	vagina_71B	0.7384
vagina_49B	rectum_72B	0.98664						vagina_49B	vagina_72B	0.9996
vagina_49B	rectum_73B	0.99856						vagina_49B	vagina_73B	0.98352
vagina_49B	rectum_75B	0.99768						vagina_49B	vagina_75B	1
vagina_49B	rectum_79B	0.99712						vagina_49B	vagina_79B	0.99688
vagina_52B	rectum_1B	0.99296						vagina_52B	vagina_1B	0.9996
vagina_52B	rectum_2B	0.99968						vagina_52B	vagina_2B	0.99928
vagina_52B	rectum_3B	0.99016						vagina_52B	vagina_3B	0.99904
vagina_52B	rectum_5B	0.99968						vagina_52B	vagina_5B	0.99968
vagina_52B	rectum_7B	1						vagina_52B	vagina_7B	0.99968
vagina_52B	rectum_9B	0.89848						vagina_52B	vagina_9B	0.8084
vagina_52B	rectum_11B	0.99968						vagina_52B	vagina_11B	0.99968
vagina_52B	rectum_12B	0.99768						vagina_52B	vagina_12B	1
vagina_52B	rectum_13B	1						vagina_52B	vagina_13B	0.99928
vagina_52B	rectum_14B	1						vagina_52B	vagina_14B	0.99968
vagina_52B	rectum_15B	1						vagina_52B	vagina_15B	0.99968
vagina_52B	rectum_16B	0.99968						vagina_52B	vagina_16B	0.99968
vagina_52B	rectum_17B	0.99968						vagina_52B	vagina_17B	0.99968
vagina_52B	rectum_18B	1						vagina_52B	vagina_18B	0.99968
vagina_52B	rectum_19B	0.99768						vagina_52B	vagina_19B	0.99968
vagina_52B	rectum_21B	0.99968						vagina_52B	vagina_21B	0.99968
vagina_52B	rectum_23B	0.99872						vagina_52B	vagina_23B	0.97088
vagina_52B	rectum_28B	0.99568						vagina_52B	vagina_28B	0.95744
vagina_52B	rectum_29B	0.67032						vagina_52B	vagina_29B	0.6592
vagina_52B	rectum_30B	0.99968						vagina_52B	vagina_30B	0.99968
vagina_52B	rectum_31B	0.99968						vagina_52B	vagina_31B	0.99968
vagina_52B	rectum_34B	0.99968						vagina_52B	vagina_34B	1
vagina_52B	rectum_37B	0.99968						vagina_52B	vagina_37B	0.99928
vagina_52B	rectum_38B	0.99968						vagina_52B	vagina_38B	0.99968
vagina_52B	rectum_39B	0.99968						vagina_52B	vagina_39B	0.99968
vagina_52B	rectum_40B	1						vagina_52B	vagina_40B	0.99968
vagina_52B	rectum_43B	0.99968						vagina_52B	vagina_43B	0.99968
vagina_52B	rectum_45B	0.92904						vagina_52B	vagina_45B	0.99928
vagina_52B	rectum_46B	0.99968						vagina_52B	vagina_46B	0.99928
vagina_52B	rectum_47B	0.99968						vagina_52B	vagina_47B	0.99968
vagina_52B	rectum_48B	0.99928						vagina_52B	vagina_48B	0.99928
vagina_52B	rectum_50B	1						vagina_52B	vagina_50B	0.99928
vagina_52B	rectum_55B	0.99952						vagina_52B	vagina_55B	0.99888
vagina_52B	rectum_59B	0.99768						vagina_52B	vagina_59B	0.99968
vagina_52B	rectum_60B	0.9996						vagina_52B	vagina_60B	0.99928
vagina_52B	rectum_63B	0.99968						vagina_52B	vagina_63B	1
vagina_52B	rectum_65B	0.99888						vagina_52B	vagina_65B	0.99944
vagina_52B	rectum_67B	1						vagina_52B	vagina_67B	0.99928
vagina_52B	rectum_68B	0.998						vagina_52B	vagina_68B	0.986
vagina_52B	rectum_69B	0.99832						vagina_52B	vagina_69B	0.99864
vagina_52B	rectum_70B	0.94176						vagina_52B	vagina_70B	0.98568
vagina_52B	rectum_71B	0.99968						vagina_52B	vagina_71B	0.99968
vagina_52B	rectum_72B	0.9668						vagina_52B	vagina_72B	0.99968
vagina_52B	rectum_73B	0.99784						vagina_52B	vagina_73B	0.74496
vagina_52B	rectum_75B	0.99928						vagina_52B	vagina_75B	0.9996
vagina_52B	rectum_79B	0.99968						vagina_52B	vagina_79B	0.9996
vagina_57B	rectum_1B	0.99336						vagina_57B	vagina_1B	1
vagina_57B	rectum_2B	0.99968						vagina_57B	vagina_2B	1
vagina_57B	rectum_3B	0.9768						vagina_57B	vagina_3B	0.99968
vagina_57B	rectum_5B	0.99368						vagina_57B	vagina_5B	1
vagina_57B	rectum_7B	1						vagina_57B	vagina_7B	1
vagina_57B	rectum_9B	0.96184						vagina_57B	vagina_9B	0.97168
vagina_57B	rectum_11B	0.99328						vagina_57B	vagina_11B	0.99968
vagina_57B	rectum_12B	0.99768						vagina_57B	vagina_12B	0.99968
vagina_57B	rectum_13B	1						vagina_57B	vagina_13B	0.97656
vagina_57B	rectum_14B	0.9956						vagina_57B	vagina_14B	0.5056
vagina_57B	rectum_15B	0.99968						vagina_57B	vagina_15B	1
vagina_57B	rectum_16B	0.99872						vagina_57B	vagina_16B	0.99072
vagina_57B	rectum_17B	1						vagina_57B	vagina_17B	0.99968
vagina_57B	rectum_18B	0.99968						vagina_57B	vagina_18B	0.99968
vagina_57B	rectum_19B	0.99968						vagina_57B	vagina_19B	0.99968
vagina_57B	rectum_21B	1						vagina_57B	vagina_21B	0.99824
vagina_57B	rectum_23B	0.99792						vagina_57B	vagina_23B	0.92312
vagina_57B	rectum_28B	0.99696						vagina_57B	vagina_28B	0.95776
vagina_57B	rectum_29B	0.8548						vagina_57B	vagina_29B	1
vagina_57B	rectum_30B	0.99968						vagina_57B	vagina_30B	0.99968
vagina_57B	rectum_31B	0.92352						vagina_57B	vagina_31B	0.75336
vagina_57B	rectum_34B	1						vagina_57B	vagina_34B	0.99968
vagina_57B	rectum_37B	0.99824						vagina_57B	vagina_37B	0.99952
vagina_57B	rectum_38B	0.99968						vagina_57B	vagina_38B	0.99968
vagina_57B	rectum_39B	0.99968						vagina_57B	vagina_39B	1
vagina_57B	rectum_40B	0.99968						vagina_57B	vagina_40B	0.99968
vagina_57B	rectum_43B	0.99968						vagina_57B	vagina_43B	0.99968
vagina_57B	rectum_45B	0.85544						vagina_57B	vagina_45B	0.99968
vagina_57B	rectum_46B	0.9904						vagina_57B	vagina_46B	0.99968
vagina_57B	rectum_47B	0.99664						vagina_57B	vagina_47B	0.99968
vagina_57B	rectum_48B	0.9996						vagina_57B	vagina_48B	0.99968
vagina_57B	rectum_50B	0.99848						vagina_57B	vagina_50B	0.99968
vagina_57B	rectum_55B	0.99632						vagina_57B	vagina_55B	1
vagina_57B	rectum_59B	0.99856						vagina_57B	vagina_59B	0.99968
vagina_57B	rectum_60B	0.99984						vagina_57B	vagina_60B	1
vagina_57B	rectum_63B	0.98104						vagina_57B	vagina_63B	0.90696
vagina_57B	rectum_65B	0.9992						vagina_57B	vagina_65B	0.99984
vagina_57B	rectum_67B	0.99968						vagina_57B	vagina_67B	1
vagina_57B	rectum_68B	0.99904						vagina_57B	vagina_68B	0.99664
vagina_57B	rectum_69B	0.51672						vagina_57B	vagina_69B	0.54312
vagina_57B	rectum_70B	0.76384						vagina_57B	vagina_70B	0.6468
vagina_57B	rectum_71B	0.97928						vagina_57B	vagina_71B	0.73808
vagina_57B	rectum_72B	0.98888						vagina_57B	vagina_72B	1
vagina_57B	rectum_73B	1						vagina_57B	vagina_73B	0.99176
vagina_57B	rectum_75B	0.99968						vagina_57B	vagina_75B	1
vagina_57B	rectum_79B	0.99864						vagina_57B	vagina_79B	0.99576
vagina_64B	rectum_1B	0.98096						vagina_64B	vagina_1B	1
vagina_64B	rectum_2B	0.99608						vagina_64B	vagina_2B	1
vagina_64B	rectum_3B	0.97152						vagina_64B	vagina_3B	1
vagina_64B	rectum_5B	0.98528						vagina_64B	vagina_5B	0.70312
vagina_64B	rectum_7B	0.98952						vagina_64B	vagina_7B	0.70312
vagina_64B	rectum_9B	0.86632						vagina_64B	vagina_9B	0.78848
vagina_64B	rectum_11B	0.98168						vagina_64B	vagina_11B	0.7068
vagina_64B	rectum_12B	0.98864						vagina_64B	vagina_12B	0.70312
vagina_64B	rectum_13B	0.98856						vagina_64B	vagina_13B	0.95512
vagina_64B	rectum_14B	0.99512						vagina_64B	vagina_14B	0.95104
vagina_64B	rectum_15B	0.94872						vagina_64B	vagina_15B	0.70312
vagina_64B	rectum_16B	0.99904						vagina_64B	vagina_16B	0.99392
vagina_64B	rectum_17B	0.80368						vagina_64B	vagina_17B	0.70312
vagina_64B	rectum_18B	0.99688						vagina_64B	vagina_18B	0.70312
vagina_64B	rectum_19B	0.9932						vagina_64B	vagina_19B	1
vagina_64B	rectum_21B	0.98096						vagina_64B	vagina_21B	0.99872
vagina_64B	rectum_23B	0.99768						vagina_64B	vagina_23B	0.93968
vagina_64B	rectum_28B	0.98944						vagina_64B	vagina_28B	0.98144
vagina_64B	rectum_29B	0.6352						vagina_64B	vagina_29B	0.68392
vagina_64B	rectum_30B	1						vagina_64B	vagina_30B	1
vagina_64B	rectum_31B	0.93704						vagina_64B	vagina_31B	0.9516
vagina_64B	rectum_34B	0.99952						vagina_64B	vagina_34B	0.70312
vagina_64B	rectum_37B	0.98872						vagina_64B	vagina_37B	0.99984
vagina_64B	rectum_38B	0.99416						vagina_64B	vagina_38B	0.70272
vagina_64B	rectum_39B	0.99448						vagina_64B	vagina_39B	1
vagina_64B	rectum_40B	0.99736						vagina_64B	vagina_40B	0.70312
vagina_64B	rectum_43B	1						vagina_64B	vagina_43B	0.99912
vagina_64B	rectum_45B	0.91152						vagina_64B	vagina_45B	1
vagina_64B	rectum_46B	0.9912						vagina_64B	vagina_46B	1
vagina_64B	rectum_47B	0.98352						vagina_64B	vagina_47B	1
vagina_64B	rectum_48B	0.99712						vagina_64B	vagina_48B	1
vagina_64B	rectum_50B	0.99528						vagina_64B	vagina_50B	0.99824
vagina_64B	rectum_55B	0.97488						vagina_64B	vagina_55B	1
vagina_64B	rectum_59B	0.99888						vagina_64B	vagina_59B	0.97776
vagina_64B	rectum_60B	1						vagina_64B	vagina_60B	1
vagina_64B	rectum_63B	0.6872						vagina_64B	vagina_63B	0.65344
vagina_64B	rectum_65B	0.99736						vagina_64B	vagina_65B	0.99984
vagina_64B	rectum_67B	1						vagina_64B	vagina_67B	1
vagina_64B	rectum_68B	0.9976						vagina_64B	vagina_68B	0.97344
vagina_64B	rectum_69B	0.94624						vagina_64B	vagina_69B	0.9428
vagina_64B	rectum_70B	0.82328						vagina_64B	vagina_70B	0.58504
vagina_64B	rectum_71B	0.9728						vagina_64B	vagina_71B	0.9516
vagina_64B	rectum_72B	0.72672						vagina_64B	vagina_72B	0.70312
vagina_64B	rectum_73B	0.99136						vagina_64B	vagina_73B	0.41184
vagina_64B	rectum_75B	1						vagina_64B	vagina_75B	1
vagina_64B	rectum_79B	0.99448						vagina_64B	vagina_79B	0.9976
vagina_74B	rectum_1B	0.9932						vagina_74B	vagina_1B	0.99992
vagina_74B	rectum_2B	0.9996						vagina_74B	vagina_2B	0.986
vagina_74B	rectum_3B	0.97944						vagina_74B	vagina_3B	0.99472
vagina_74B	rectum_5B	0.9996						vagina_74B	vagina_5B	0.9968
vagina_74B	rectum_7B	1						vagina_74B	vagina_7B	0.9996
vagina_74B	rectum_9B	0.96448						vagina_74B	vagina_9B	0.98016
vagina_74B	rectum_11B	0.99568						vagina_74B	vagina_11B	0.9984
vagina_74B	rectum_12B	0.99768						vagina_74B	vagina_12B	1
vagina_74B	rectum_13B	1						vagina_74B	vagina_13B	0.97592
vagina_74B	rectum_14B	0.9956						vagina_74B	vagina_14B	0.8284
vagina_74B	rectum_15B	1						vagina_74B	vagina_15B	0.99136
vagina_74B	rectum_16B	0.9996						vagina_74B	vagina_16B	0.9996
vagina_74B	rectum_17B	0.9996						vagina_74B	vagina_17B	0.9996
vagina_74B	rectum_18B	1						vagina_74B	vagina_18B	0.9996
vagina_74B	rectum_19B	0.9996						vagina_74B	vagina_19B	0.9996
vagina_74B	rectum_21B	0.9996						vagina_74B	vagina_21B	0.9996
vagina_74B	rectum_23B	0.99784						vagina_74B	vagina_23B	0.92304
vagina_74B	rectum_28B	0.99728						vagina_74B	vagina_28B	0.95768
vagina_74B	rectum_29B	0.85472						vagina_74B	vagina_29B	0.9996
vagina_74B	rectum_30B	0.9996						vagina_74B	vagina_30B	0.9996
vagina_74B	rectum_31B	0.9324						vagina_74B	vagina_31B	0.82848
vagina_74B	rectum_34B	0.9996						vagina_74B	vagina_34B	0.99544
vagina_74B	rectum_37B	0.9996						vagina_74B	vagina_37B	0.99936
vagina_74B	rectum_38B	0.9996						vagina_74B	vagina_38B	0.9996
vagina_74B	rectum_39B	0.9996						vagina_74B	vagina_39B	0.9996
vagina_74B	rectum_40B	0.99968						vagina_74B	vagina_40B	0.99568
vagina_74B	rectum_43B	0.9996						vagina_74B	vagina_43B	0.9996
vagina_74B	rectum_45B	0.86504						vagina_74B	vagina_45B	0.99936
vagina_74B	rectum_46B	0.99952						vagina_74B	vagina_46B	0.99952
vagina_74B	rectum_47B	0.9996						vagina_74B	vagina_47B	0.9996
vagina_74B	rectum_48B	0.99912						vagina_74B	vagina_48B	0.99952
vagina_74B	rectum_50B	0.99848						vagina_74B	vagina_50B	0.99952
vagina_74B	rectum_55B	0.9996						vagina_74B	vagina_55B	0.99744
vagina_74B	rectum_59B	0.9996						vagina_74B	vagina_59B	0.9996
vagina_74B	rectum_60B	0.99992						vagina_74B	vagina_60B	0.99952
vagina_74B	rectum_63B	0.98144						vagina_74B	vagina_63B	0.91
vagina_74B	rectum_65B	0.9988						vagina_74B	vagina_65B	0.99688
vagina_74B	rectum_67B	1						vagina_74B	vagina_67B	0.99952
vagina_74B	rectum_68B	0.99856						vagina_74B	vagina_68B	0.99616
vagina_74B	rectum_69B	0.8264						vagina_74B	vagina_69B	0.8268
vagina_74B	rectum_70B	0.776						vagina_74B	vagina_70B	0.81456
vagina_74B	rectum_71B	0.9792						vagina_74B	vagina_71B	0.82888
vagina_74B	rectum_72B	0.98896						vagina_74B	vagina_72B	0.9996
vagina_74B	rectum_73B	0.9996						vagina_74B	vagina_73B	0.9956
vagina_74B	rectum_75B	0.99936						vagina_74B	vagina_75B	0.99624
vagina_74B	rectum_79B	0.99952						vagina_74B	vagina_79B	0.99784
vagina_76B	rectum_1B	0.97232						vagina_76B	vagina_1B	0.99992
vagina_76B	rectum_2B	0.97976						vagina_76B	vagina_2B	0.9968
vagina_76B	rectum_3B	0.92936						vagina_76B	vagina_3B	0.98944
vagina_76B	rectum_5B	0.93832						vagina_76B	vagina_5B	0.99712
vagina_76B	rectum_7B	1						vagina_76B	vagina_7B	0.99208
vagina_76B	rectum_9B	0.99384						vagina_76B	vagina_9B	0.9784
vagina_76B	rectum_11B	0.95632						vagina_76B	vagina_11B	0.9696
vagina_76B	rectum_12B	0.99624						vagina_76B	vagina_12B	0.99472
vagina_76B	rectum_13B	0.9984						vagina_76B	vagina_13B	0.99568
vagina_76B	rectum_14B	0.996						vagina_76B	vagina_14B	0.9808
vagina_76B	rectum_15B	0.99392						vagina_76B	vagina_15B	0.99616
vagina_76B	rectum_16B	0.99104						vagina_76B	vagina_16B	0.94448
vagina_76B	rectum_17B	0.99568						vagina_76B	vagina_17B	0.992
vagina_76B	rectum_18B	0.99472						vagina_76B	vagina_18B	0.98696
vagina_76B	rectum_19B	0.95648						vagina_76B	vagina_19B	0.98072
vagina_76B	rectum_21B	0.99744						vagina_76B	vagina_21B	0.95752
vagina_76B	rectum_23B	0.9848						vagina_76B	vagina_23B	0.95888
vagina_76B	rectum_28B	0.98792						vagina_76B	vagina_28B	0.9916
vagina_76B	rectum_29B	0.93064						vagina_76B	vagina_29B	0.99728
vagina_76B	rectum_30B	0.98024						vagina_76B	vagina_30B	0.99016
vagina_76B	rectum_31B	0.98128						vagina_76B	vagina_31B	0.99256
vagina_76B	rectum_34B	0.99544						vagina_76B	vagina_34B	0.99472
vagina_76B	rectum_37B	0.99376						vagina_76B	vagina_37B	0.99376
vagina_76B	rectum_38B	0.99208						vagina_76B	vagina_38B	0.94728
vagina_76B	rectum_39B	0.99168						vagina_76B	vagina_39B	0.99376
vagina_76B	rectum_40B	0.9968						vagina_76B	vagina_40B	0.99456
vagina_76B	rectum_43B	0.93312						vagina_76B	vagina_43B	0.99328
vagina_76B	rectum_45B	0.9848						vagina_76B	vagina_45B	0.99176
vagina_76B	rectum_46B	0.92792						vagina_76B	vagina_46B	0.99288
vagina_76B	rectum_47B	0.98408						vagina_76B	vagina_47B	0.98232
vagina_76B	rectum_48B	0.99472						vagina_76B	vagina_48B	0.98008
vagina_76B	rectum_50B	0.9988						vagina_76B	vagina_50B	0.93456
vagina_76B	rectum_55B	0.9956						vagina_76B	vagina_55B	0.99648
vagina_76B	rectum_59B	0.87976						vagina_76B	vagina_59B	0.99576
vagina_76B	rectum_60B	0.9992						vagina_76B	vagina_60B	0.99864
vagina_76B	rectum_63B	0.9864						vagina_76B	vagina_63B	0.99632
vagina_76B	rectum_65B	0.99816						vagina_76B	vagina_65B	0.99872
vagina_76B	rectum_67B	0.99688						vagina_76B	vagina_67B	0.99864
vagina_76B	rectum_68B	0.99776						vagina_76B	vagina_68B	0.99776
vagina_76B	rectum_69B	0.99296						vagina_76B	vagina_69B	0.99
vagina_76B	rectum_70B	0.99						vagina_76B	vagina_70B	0.9996
vagina_76B	rectum_71B	0.99648						vagina_76B	vagina_71B	0.99944
vagina_76B	rectum_72B	0.97568						vagina_76B	vagina_72B	0.99912
vagina_76B	rectum_73B	0.99744						vagina_76B	vagina_73B	0.99024
vagina_76B	rectum_75B	0.99512						vagina_76B	vagina_75B	0.99872
vagina_76B	rectum_79B	0.992						vagina_76B	vagina_79B	0.9948
vagina_80B	rectum_1B	0.99952						vagina_80B	vagina_1B	0.99576
vagina_80B	rectum_2B	0.99952						vagina_80B	vagina_2B	1
vagina_80B	rectum_3B	0.9968						vagina_80B	vagina_3B	0.99928
vagina_80B	rectum_5B	0.99272						vagina_80B	vagina_5B	1
vagina_80B	rectum_7B	1						vagina_80B	vagina_7B	1
vagina_80B	rectum_9B	0.98872						vagina_80B	vagina_9B	0.98888
vagina_80B	rectum_11B	0.99688						vagina_80B	vagina_11B	0.99952
vagina_80B	rectum_12B	0.99904						vagina_80B	vagina_12B	0.99952
vagina_80B	rectum_13B	1						vagina_80B	vagina_13B	0.99968
vagina_80B	rectum_14B	0.99952						vagina_80B	vagina_14B	0.99904
vagina_80B	rectum_15B	0.99736						vagina_80B	vagina_15B	0.99896
vagina_80B	rectum_16B	0.99856						vagina_80B	vagina_16B	0.96784
vagina_80B	rectum_17B	1						vagina_80B	vagina_17B	0.99952
vagina_80B	rectum_18B	0.99952						vagina_80B	vagina_18B	0.99952
vagina_80B	rectum_19B	0.99952						vagina_80B	vagina_19B	0.99952
vagina_80B	rectum_21B	1						vagina_80B	vagina_21B	0.99808
vagina_80B	rectum_23B	0.99936						vagina_80B	vagina_23B	0.99912
vagina_80B	rectum_28B	0.99912						vagina_80B	vagina_28B	0.99952
vagina_80B	rectum_29B	0.99952						vagina_80B	vagina_29B	1
vagina_80B	rectum_30B	0.99952						vagina_80B	vagina_30B	0.99952
vagina_80B	rectum_31B	0.9844						vagina_80B	vagina_31B	0.99952
vagina_80B	rectum_34B	1						vagina_80B	vagina_34B	0.99952
vagina_80B	rectum_37B	0.99824						vagina_80B	vagina_37B	0.99952
vagina_80B	rectum_38B	0.99952						vagina_80B	vagina_38B	0.99952
vagina_80B	rectum_39B	0.99952						vagina_80B	vagina_39B	1
vagina_80B	rectum_40B	0.99952						vagina_80B	vagina_40B	0.99952
vagina_80B	rectum_43B	0.99952						vagina_80B	vagina_43B	0.99952
vagina_80B	rectum_45B	0.98704						vagina_80B	vagina_45B	0.99952
vagina_80B	rectum_46B	0.98808						vagina_80B	vagina_46B	0.99952
vagina_80B	rectum_47B	0.99464						vagina_80B	vagina_47B	0.99952
vagina_80B	rectum_48B	1						vagina_80B	vagina_48B	0.99952
vagina_80B	rectum_50B	1						vagina_80B	vagina_50B	0.99952
vagina_80B	rectum_55B	0.99768						vagina_80B	vagina_55B	1
vagina_80B	rectum_59B	0.9984						vagina_80B	vagina_59B	0.90784
vagina_80B	rectum_60B	0.99984						vagina_80B	vagina_60B	1
vagina_80B	rectum_63B	0.99904						vagina_80B	vagina_63B	0.9968
vagina_80B	rectum_65B	0.99992						vagina_80B	vagina_65B	1
vagina_80B	rectum_67B	0.99952						vagina_80B	vagina_67B	1
vagina_80B	rectum_68B	1						vagina_80B	vagina_68B	0.99848
vagina_80B	rectum_69B	0.9944						vagina_80B	vagina_69B	0.98848
vagina_80B	rectum_70B	0.98112						vagina_80B	vagina_70B	0.9996
vagina_80B	rectum_71B	0.99952						vagina_80B	vagina_71B	0.99952
vagina_80B	rectum_72B	0.99936						vagina_80B	vagina_72B	1
vagina_80B	rectum_73B	1						vagina_80B	vagina_73B	0.9612
vagina_80B	rectum_75B	0.99952						vagina_80B	vagina_75B	1
vagina_80B	rectum_79B	0.99848						vagina_80B	vagina_79B	0.99576

## Sheet: FIG2H
to CST4 Vagina		CST1 Vagina				CST2 Vagina				CST3 Vagina				CST4 Vagina				CST5 Vagina		Table Analyzed	Data 1
SubjectID1	SubjectID2	Distance		SubjectID1	SubjectID2	Distance		SubjectID1	SubjectID2	Distance		SubjectID1	SubjectID2	Distance		SubjectID1	SubjectID2	Distance
vagina_10B	vagina_1B	1		vagina_10B	vagina_14B	0.80656		vagina_10B	vagina_5B	0.79712		vagina_22B	vagina_10B	0.75928		vagina_10B	vagina_28B	0.994		Kruskal-Wallis test
vagina_10B	vagina_2B	0.99872		vagina_10B	vagina_16B	0.99352		vagina_10B	vagina_7B	0.79672		vagina_24B	vagina_10B	0.98808		vagina_10B	vagina_31B	0.80728		P value	<0.0001
vagina_10B	vagina_3B	0.99872		vagina_10B	vagina_19B	0.99872		vagina_10B	vagina_11B	0.79672		vagina_24B	vagina_22B	0.90072		vagina_22B	vagina_28B	0.95712		Exact or approximate P value?	Approximate
vagina_10B	vagina_9B	0.88432		vagina_10B	vagina_21B	0.99728		vagina_10B	vagina_12B	0.798		vagina_25B	vagina_10B	0.99432		vagina_22B	vagina_31B	0.91944		P value summary	****
vagina_10B	vagina_13B	0.954		vagina_10B	vagina_23B	0.94616		vagina_10B	vagina_15B	0.79672		vagina_25B	vagina_22B	0.90624		vagina_24B	vagina_28B	0.94048		Do the medians vary signif. (P < 0.05)?	Yes
vagina_10B	vagina_30B	0.99872		vagina_10B	vagina_29B	0.90608		vagina_10B	vagina_17B	0.79672		vagina_25B	vagina_24B	0.60848		vagina_24B	vagina_31B	0.99256		Number of groups	5
vagina_10B	vagina_37B	0.99856		vagina_10B	vagina_43B	0.99784		vagina_10B	vagina_18B	0.79672		vagina_35B	vagina_10B	0.99872		vagina_25B	vagina_28B	0.94896		Kruskal-Wallis statistic	93.27
vagina_10B	vagina_39B	0.99824		vagina_10B	vagina_59B	0.998		vagina_10B	vagina_34B	0.798		vagina_35B	vagina_22B	0.99936		vagina_25B	vagina_31B	0.99272
vagina_10B	vagina_45B	0.99856		vagina_10B	vagina_69B	0.8028		vagina_10B	vagina_38B	0.79672		vagina_35B	vagina_24B	0.9516		vagina_35B	vagina_28B	0.98544		Data summary
vagina_10B	vagina_46B	0.99872		vagina_10B	vagina_71B	0.80856		vagina_10B	vagina_40B	0.79672		vagina_35B	vagina_25B	0.9916		vagina_35B	vagina_31B	0.99272		Number of treatments (columns)	5
vagina_10B	vagina_47B	0.99872		vagina_10B	vagina_79B	0.99672		vagina_10B	vagina_63B	0.68088		vagina_49B	vagina_10B	0.76888		vagina_49B	vagina_28B	0.95552		Number of values (total)	618
vagina_10B	vagina_48B	0.99872		vagina_22B	vagina_14B	0.91896		vagina_10B	vagina_70B	0.58048		vagina_49B	vagina_22B	0.81904		vagina_49B	vagina_31B	0.75112
vagina_10B	vagina_50B	0.99696		vagina_22B	vagina_16B	0.99384		vagina_10B	vagina_72B	0.7976		vagina_49B	vagina_24B	0.90968		vagina_52B	vagina_28B	0.95744		Dunn's multiple comparisons test	Mean rank diff.	Significant?	Summary	Adjusted P Value	D-?
vagina_10B	vagina_55B	0.99856		vagina_22B	vagina_19B	0.99936		vagina_10B	vagina_73B	0.69736		vagina_49B	vagina_25B	0.91496		vagina_52B	vagina_31B	0.99968		CSTⅣ vs. CSTⅠ	-204.5	Yes	****	<0.0001	A	CSTⅠ
vagina_10B	vagina_60B	0.9988		vagina_22B	vagina_21B	0.99936		vagina_22B	vagina_5B	0.99936		vagina_49B	vagina_35B	0.99744		vagina_57B	vagina_28B	0.95776		CSTⅣ vs. CSTⅡ	-83	Yes	**	0.0081	B	CSTⅡ
vagina_10B	vagina_65B	0.99984		vagina_22B	vagina_23B	0.9224		vagina_22B	vagina_7B	0.99936		vagina_52B	vagina_10B	0.90264		vagina_57B	vagina_31B	0.75336		CSTⅣ vs. CSTⅢ	-130.3	Yes	****	<0.0001	C	CSTⅢ
vagina_10B	vagina_67B	0.99872		vagina_22B	vagina_29B	0.74384		vagina_22B	vagina_11B	0.99936		vagina_52B	vagina_22B	0.65104		vagina_64B	vagina_28B	0.98144		CSTⅣ vs. CSTⅤ	-19.02	No	ns	>0.9999	E	CSTⅤ
vagina_10B	vagina_68B	0.97256		vagina_22B	vagina_43B	0.99936		vagina_22B	vagina_12B	1		vagina_52B	vagina_24B	0.62904		vagina_64B	vagina_31B	0.9516
vagina_10B	vagina_75B	0.99976		vagina_22B	vagina_59B	0.98472		vagina_22B	vagina_15B	0.99936		vagina_52B	vagina_25B	0.56008		vagina_74B	vagina_28B	0.95768
vagina_22B	vagina_1B	1		vagina_22B	vagina_69B	0.91592		vagina_22B	vagina_17B	0.99936		vagina_52B	vagina_35B	0.99968		vagina_74B	vagina_31B	0.82848
vagina_22B	vagina_2B	0.99936		vagina_22B	vagina_71B	0.92008		vagina_22B	vagina_18B	0.99936		vagina_52B	vagina_49B	0.9172		vagina_76B	vagina_28B	0.9916
vagina_22B	vagina_3B	0.99936		vagina_22B	vagina_79B	0.99888		vagina_22B	vagina_34B	1		vagina_57B	vagina_10B	0.79936		vagina_76B	vagina_31B	0.99256
vagina_22B	vagina_9B	0.78856		vagina_24B	vagina_14B	0.98024		vagina_22B	vagina_38B	0.99936		vagina_57B	vagina_22B	0.8228		vagina_80B	vagina_28B	0.99952
vagina_22B	vagina_13B	0.97592		vagina_24B	vagina_16B	0.97672		vagina_22B	vagina_40B	0.99936		vagina_57B	vagina_24B	0.61976		vagina_80B	vagina_31B	0.99952
vagina_22B	vagina_30B	0.99936		vagina_24B	vagina_19B	0.98072		vagina_22B	vagina_63B	0.89968		vagina_57B	vagina_25B	0.54664
vagina_22B	vagina_37B	0.99808		vagina_24B	vagina_21B	0.93528		vagina_22B	vagina_70B	0.90576		vagina_57B	vagina_35B	0.99968
vagina_22B	vagina_39B	0.99936		vagina_24B	vagina_23B	0.93008		vagina_22B	vagina_72B	0.9996		vagina_57B	vagina_49B	0.39064
vagina_22B	vagina_45B	0.99936		vagina_24B	vagina_29B	0.99728		vagina_22B	vagina_73B	0.74392		vagina_57B	vagina_52B	0.54904
vagina_22B	vagina_46B	0.99936		vagina_24B	vagina_43B	0.99328		vagina_24B	vagina_5B	0.99712		vagina_64B	vagina_10B	0.59496
vagina_22B	vagina_47B	0.99936		vagina_24B	vagina_59B	0.99576		vagina_24B	vagina_7B	0.99208		vagina_64B	vagina_22B	0.63632
vagina_22B	vagina_48B	0.99936		vagina_24B	vagina_69B	0.98344		vagina_24B	vagina_11B	0.96944		vagina_64B	vagina_24B	0.97272
vagina_22B	vagina_50B	0.99936		vagina_24B	vagina_71B	0.99952		vagina_24B	vagina_12B	0.99296		vagina_64B	vagina_25B	0.98176
vagina_22B	vagina_55B	0.99936		vagina_24B	vagina_79B	0.99488		vagina_24B	vagina_15B	0.99616		vagina_64B	vagina_35B	1
vagina_22B	vagina_60B	0.99936		vagina_25B	vagina_14B	0.65344		vagina_24B	vagina_17B	0.99176		vagina_64B	vagina_49B	0.85184
vagina_22B	vagina_65B	0.99984		vagina_25B	vagina_16B	0.65472		vagina_24B	vagina_18B	0.98656		vagina_64B	vagina_52B	0.66568
vagina_22B	vagina_67B	0.99936		vagina_25B	vagina_19B	0.64368		vagina_24B	vagina_34B	0.99472		vagina_64B	vagina_57B	0.9276
vagina_22B	vagina_68B	0.98408		vagina_25B	vagina_21B	0.63992		vagina_24B	vagina_38B	0.94728		vagina_74B	vagina_10B	0.8244
vagina_22B	vagina_75B	0.99976		vagina_25B	vagina_23B	0.61104		vagina_24B	vagina_40B	0.99488		vagina_74B	vagina_22B	0.82656
vagina_24B	vagina_1B	1		vagina_25B	vagina_29B	0.65704		vagina_24B	vagina_63B	0.99632		vagina_74B	vagina_24B	0.62896
vagina_24B	vagina_2B	0.99688		vagina_25B	vagina_43B	0.65304		vagina_24B	vagina_70B	0.98528		vagina_74B	vagina_25B	0.4452
vagina_24B	vagina_3B	0.98968		vagina_25B	vagina_59B	0.656		vagina_24B	vagina_72B	0.99912		vagina_74B	vagina_35B	0.9996
vagina_24B	vagina_9B	0.97312		vagina_25B	vagina_69B	0.65976		vagina_24B	vagina_73B	0.98816		vagina_74B	vagina_49B	0.746
vagina_24B	vagina_13B	0.99576		vagina_25B	vagina_71B	0.65928		vagina_25B	vagina_5B	0.99464		vagina_74B	vagina_52B	0.54448
vagina_24B	vagina_30B	0.99008		vagina_25B	vagina_79B	0.65888		vagina_25B	vagina_7B	0.99208		vagina_74B	vagina_57B	0.364
vagina_24B	vagina_37B	0.99384		vagina_35B	vagina_14B	0.9916		vagina_25B	vagina_11B	0.97576		vagina_74B	vagina_64B	0.93336
vagina_24B	vagina_39B	0.99376		vagina_35B	vagina_16B	0.99656		vagina_25B	vagina_12B	0.99472		vagina_76B	vagina_10B	0.99352
vagina_24B	vagina_45B	0.99184		vagina_35B	vagina_19B	0.99128		vagina_25B	vagina_15B	0.99616		vagina_76B	vagina_22B	0.99384
vagina_24B	vagina_46B	0.99296		vagina_35B	vagina_21B	0.98512		vagina_25B	vagina_17B	0.99248		vagina_76B	vagina_24B	0.91048
vagina_24B	vagina_47B	0.98216		vagina_35B	vagina_23B	0.9916		vagina_25B	vagina_18B	0.98696		vagina_76B	vagina_25B	0.98008
vagina_24B	vagina_48B	0.98016		vagina_35B	vagina_29B	0.9968		vagina_25B	vagina_34B	0.99472		vagina_76B	vagina_35B	0.9916
vagina_24B	vagina_50B	0.8372		vagina_35B	vagina_43B	0.9932		vagina_25B	vagina_38B	0.98048		vagina_76B	vagina_49B	0.99216
vagina_24B	vagina_55B	0.99696		vagina_35B	vagina_59B	0.99624		vagina_25B	vagina_40B	0.99504		vagina_76B	vagina_52B	0.99768
vagina_24B	vagina_60B	0.9988		vagina_35B	vagina_69B	1		vagina_25B	vagina_63B	0.99904		vagina_76B	vagina_57B	0.9904
vagina_24B	vagina_65B	0.99864		vagina_35B	vagina_71B	0.99952		vagina_25B	vagina_70B	0.98568		vagina_76B	vagina_64B	0.99392
vagina_24B	vagina_67B	0.99872		vagina_35B	vagina_79B	0.99912		vagina_25B	vagina_72B	0.9996		vagina_76B	vagina_74B	0.9996
vagina_24B	vagina_68B	0.99832		vagina_49B	vagina_14B	0.43744		vagina_25B	vagina_73B	0.99552		vagina_80B	vagina_10B	0.99384
vagina_24B	vagina_75B	0.9988		vagina_49B	vagina_16B	0.99216		vagina_35B	vagina_5B	0.99744		vagina_80B	vagina_22B	0.97408
vagina_25B	vagina_1B	1		vagina_49B	vagina_19B	0.99744		vagina_35B	vagina_7B	0.99568		vagina_80B	vagina_24B	0.98128
vagina_25B	vagina_2B	0.99688		vagina_49B	vagina_21B	0.99584		vagina_35B	vagina_11B	0.9916		vagina_80B	vagina_25B	0.99952
vagina_25B	vagina_3B	0.98968		vagina_49B	vagina_23B	0.92032		vagina_35B	vagina_12B	0.99632		vagina_80B	vagina_35B	0.99952
vagina_25B	vagina_9B	0.97224		vagina_49B	vagina_29B	0.99744		vagina_35B	vagina_15B	0.99736		vagina_80B	vagina_49B	0.912
vagina_25B	vagina_13B	0.99608		vagina_49B	vagina_43B	0.99744		vagina_35B	vagina_17B	0.99456		vagina_80B	vagina_52B	0.99864
vagina_25B	vagina_30B	0.99032		vagina_49B	vagina_59B	0.91584		vagina_35B	vagina_18B	0.9916		vagina_80B	vagina_57B	0.98808
vagina_25B	vagina_37B	0.99384		vagina_49B	vagina_69B	0.54672		vagina_35B	vagina_34B	0.99592		vagina_80B	vagina_64B	0.93464
vagina_25B	vagina_39B	0.99376		vagina_49B	vagina_71B	0.7384		vagina_35B	vagina_38B	0.99024		vagina_80B	vagina_74B	1
vagina_25B	vagina_45B	0.99184		vagina_49B	vagina_79B	0.99688		vagina_35B	vagina_40B	0.99504		vagina_80B	vagina_76B	0.96576
vagina_25B	vagina_46B	0.99296		vagina_52B	vagina_14B	0.99968		vagina_35B	vagina_63B	0.99904
vagina_25B	vagina_47B	0.98352		vagina_52B	vagina_16B	0.99968		vagina_35B	vagina_70B	1
vagina_25B	vagina_48B	0.98176		vagina_52B	vagina_19B	0.99968		vagina_35B	vagina_72B	0.9996
vagina_25B	vagina_50B	0.98048		vagina_52B	vagina_21B	0.99968		vagina_35B	vagina_73B	0.9976
vagina_25B	vagina_55B	0.99808		vagina_52B	vagina_23B	0.97088		vagina_49B	vagina_5B	0.99872
vagina_25B	vagina_60B	0.9988		vagina_52B	vagina_29B	0.6592		vagina_49B	vagina_7B	0.99744
vagina_25B	vagina_65B	0.99864		vagina_52B	vagina_43B	0.99968		vagina_49B	vagina_11B	0.99728
vagina_25B	vagina_67B	0.99872		vagina_52B	vagina_59B	0.99968		vagina_49B	vagina_12B	1
vagina_25B	vagina_68B	0.99832		vagina_52B	vagina_69B	0.99864		vagina_49B	vagina_15B	0.99784
vagina_25B	vagina_75B	0.9988		vagina_52B	vagina_71B	0.99968		vagina_49B	vagina_17B	0.99784
vagina_35B	vagina_1B	1		vagina_52B	vagina_79B	0.9996		vagina_49B	vagina_18B	0.99744
vagina_35B	vagina_2B	0.99688		vagina_57B	vagina_14B	0.5056		vagina_49B	vagina_34B	1
vagina_35B	vagina_3B	0.9916		vagina_57B	vagina_16B	0.99072		vagina_49B	vagina_38B	0.99728
vagina_35B	vagina_9B	0.99216		vagina_57B	vagina_19B	0.99968		vagina_49B	vagina_40B	0.99744
vagina_35B	vagina_13B	0.99736		vagina_57B	vagina_21B	0.99824		vagina_49B	vagina_63B	0.908
vagina_35B	vagina_30B	0.9916		vagina_57B	vagina_23B	0.92312		vagina_49B	vagina_70B	0.58624
vagina_35B	vagina_37B	0.99392		vagina_57B	vagina_29B	1		vagina_49B	vagina_72B	0.9996
vagina_35B	vagina_39B	0.99608		vagina_57B	vagina_43B	0.99968		vagina_49B	vagina_73B	0.98352
vagina_35B	vagina_45B	0.99304		vagina_57B	vagina_59B	0.99968		vagina_52B	vagina_5B	0.99968
vagina_35B	vagina_46B	0.99304		vagina_57B	vagina_69B	0.54312		vagina_52B	vagina_7B	0.99968
vagina_35B	vagina_47B	0.99128		vagina_57B	vagina_71B	0.73808		vagina_52B	vagina_11B	0.99968
vagina_35B	vagina_48B	0.9916		vagina_57B	vagina_79B	0.99576		vagina_52B	vagina_12B	1
vagina_35B	vagina_50B	0.98928		vagina_64B	vagina_14B	0.95104		vagina_52B	vagina_15B	0.99968
vagina_35B	vagina_55B	0.99808		vagina_64B	vagina_16B	0.99392		vagina_52B	vagina_17B	0.99968
vagina_35B	vagina_60B	0.9988		vagina_64B	vagina_19B	1		vagina_52B	vagina_18B	0.99968
vagina_35B	vagina_65B	0.9988		vagina_64B	vagina_21B	0.99872		vagina_52B	vagina_34B	1
vagina_35B	vagina_67B	0.99872		vagina_64B	vagina_23B	0.93968		vagina_52B	vagina_38B	0.99968
vagina_35B	vagina_68B	0.99872		vagina_64B	vagina_29B	0.68392		vagina_52B	vagina_40B	0.99968
vagina_35B	vagina_75B	0.9988		vagina_64B	vagina_43B	0.99912		vagina_52B	vagina_63B	1
vagina_49B	vagina_1B	0.99984		vagina_64B	vagina_59B	0.97776		vagina_52B	vagina_70B	0.98568
vagina_49B	vagina_2B	0.99752		vagina_64B	vagina_69B	0.9428		vagina_52B	vagina_72B	0.99968
vagina_49B	vagina_3B	0.99728		vagina_64B	vagina_71B	0.9516		vagina_52B	vagina_73B	0.74496
vagina_49B	vagina_9B	0.97272		vagina_64B	vagina_79B	0.9976		vagina_57B	vagina_5B	1
vagina_49B	vagina_13B	0.97424		vagina_74B	vagina_14B	0.8284		vagina_57B	vagina_7B	1
vagina_49B	vagina_30B	0.99728		vagina_74B	vagina_16B	0.9996		vagina_57B	vagina_11B	0.99968
vagina_49B	vagina_37B	0.99736		vagina_74B	vagina_19B	0.9996		vagina_57B	vagina_12B	0.99968
vagina_49B	vagina_39B	0.99744		vagina_74B	vagina_21B	0.9996		vagina_57B	vagina_15B	1
vagina_49B	vagina_45B	0.99728		vagina_74B	vagina_23B	0.92304		vagina_57B	vagina_17B	0.99968
vagina_49B	vagina_46B	0.99744		vagina_74B	vagina_29B	0.9996		vagina_57B	vagina_18B	0.99968
vagina_49B	vagina_47B	0.99744		vagina_74B	vagina_43B	0.9996		vagina_57B	vagina_34B	0.99968
vagina_49B	vagina_48B	0.99728		vagina_74B	vagina_59B	0.9996		vagina_57B	vagina_38B	0.99968
vagina_49B	vagina_50B	0.99728		vagina_74B	vagina_69B	0.8268		vagina_57B	vagina_40B	0.99968
vagina_49B	vagina_55B	0.99824		vagina_74B	vagina_71B	0.82888		vagina_57B	vagina_63B	0.90696
vagina_49B	vagina_60B	0.9988		vagina_74B	vagina_79B	0.99784		vagina_57B	vagina_70B	0.6468
vagina_49B	vagina_65B	0.99928		vagina_76B	vagina_14B	0.9808		vagina_57B	vagina_72B	1
vagina_49B	vagina_67B	0.99872		vagina_76B	vagina_16B	0.94448		vagina_57B	vagina_73B	0.99176
vagina_49B	vagina_68B	0.9952		vagina_76B	vagina_19B	0.98072		vagina_64B	vagina_5B	0.70312
vagina_49B	vagina_75B	1		vagina_76B	vagina_21B	0.95752		vagina_64B	vagina_7B	0.70312
vagina_52B	vagina_1B	0.9996		vagina_76B	vagina_23B	0.95888		vagina_64B	vagina_11B	0.7068
vagina_52B	vagina_2B	0.99928		vagina_76B	vagina_29B	0.99728		vagina_64B	vagina_12B	0.70312
vagina_52B	vagina_3B	0.99904		vagina_76B	vagina_43B	0.99328		vagina_64B	vagina_15B	0.70312
vagina_52B	vagina_9B	0.8084		vagina_76B	vagina_59B	0.99576		vagina_64B	vagina_17B	0.70312
vagina_52B	vagina_13B	0.99928		vagina_76B	vagina_69B	0.99		vagina_64B	vagina_18B	0.70312
vagina_52B	vagina_30B	0.99968		vagina_76B	vagina_71B	0.99944		vagina_64B	vagina_34B	0.70312
vagina_52B	vagina_37B	0.99928		vagina_76B	vagina_79B	0.9948		vagina_64B	vagina_38B	0.70272
vagina_52B	vagina_39B	0.99968		vagina_80B	vagina_14B	0.99904		vagina_64B	vagina_40B	0.70312
vagina_52B	vagina_45B	0.99928		vagina_80B	vagina_16B	0.96784		vagina_64B	vagina_63B	0.65344
vagina_52B	vagina_46B	0.99928		vagina_80B	vagina_19B	0.99952		vagina_64B	vagina_70B	0.58504
vagina_52B	vagina_47B	0.99968		vagina_80B	vagina_21B	0.99808		vagina_64B	vagina_72B	0.70312
vagina_52B	vagina_48B	0.99928		vagina_80B	vagina_23B	0.99912		vagina_64B	vagina_73B	0.41184
vagina_52B	vagina_50B	0.99928		vagina_80B	vagina_29B	1		vagina_74B	vagina_5B	0.9968
vagina_52B	vagina_55B	0.99888		vagina_80B	vagina_43B	0.99952		vagina_74B	vagina_7B	0.9996
vagina_52B	vagina_60B	0.99928		vagina_80B	vagina_59B	0.90784		vagina_74B	vagina_11B	0.9984
vagina_52B	vagina_65B	0.99944		vagina_80B	vagina_69B	0.98848		vagina_74B	vagina_12B	1
vagina_52B	vagina_67B	0.99928		vagina_80B	vagina_71B	0.99952		vagina_74B	vagina_15B	0.99136
vagina_52B	vagina_68B	0.986		vagina_80B	vagina_79B	0.99576		vagina_74B	vagina_17B	0.9996
vagina_52B	vagina_75B	0.9996						vagina_74B	vagina_18B	0.9996
vagina_57B	vagina_1B	1						vagina_74B	vagina_34B	0.99544
vagina_57B	vagina_2B	1						vagina_74B	vagina_38B	0.9996
vagina_57B	vagina_3B	0.99968						vagina_74B	vagina_40B	0.99568
vagina_57B	vagina_9B	0.97168						vagina_74B	vagina_63B	0.91
vagina_57B	vagina_13B	0.97656						vagina_74B	vagina_70B	0.81456
vagina_57B	vagina_30B	0.99968						vagina_74B	vagina_72B	0.9996
vagina_57B	vagina_37B	0.99952						vagina_74B	vagina_73B	0.9956
vagina_57B	vagina_39B	1						vagina_76B	vagina_5B	0.99712
vagina_57B	vagina_45B	0.99968						vagina_76B	vagina_7B	0.99208
vagina_57B	vagina_46B	0.99968						vagina_76B	vagina_11B	0.9696
vagina_57B	vagina_47B	0.99968						vagina_76B	vagina_12B	0.99472
vagina_57B	vagina_48B	0.99968						vagina_76B	vagina_15B	0.99616
vagina_57B	vagina_50B	0.99968						vagina_76B	vagina_17B	0.992
vagina_57B	vagina_55B	1						vagina_76B	vagina_18B	0.98696
vagina_57B	vagina_60B	1						vagina_76B	vagina_34B	0.99472
vagina_57B	vagina_65B	0.99984						vagina_76B	vagina_38B	0.94728
vagina_57B	vagina_67B	1						vagina_76B	vagina_40B	0.99456
vagina_57B	vagina_68B	0.99664						vagina_76B	vagina_63B	0.99632
vagina_57B	vagina_75B	1						vagina_76B	vagina_70B	0.9996
vagina_64B	vagina_1B	1						vagina_76B	vagina_72B	0.99912
vagina_64B	vagina_2B	1						vagina_76B	vagina_73B	0.99024
vagina_64B	vagina_3B	1						vagina_80B	vagina_5B	1
vagina_64B	vagina_9B	0.78848						vagina_80B	vagina_7B	1
vagina_64B	vagina_13B	0.95512						vagina_80B	vagina_11B	0.99952
vagina_64B	vagina_30B	1						vagina_80B	vagina_12B	0.99952
vagina_64B	vagina_37B	0.99984						vagina_80B	vagina_15B	0.99896
vagina_64B	vagina_39B	1						vagina_80B	vagina_17B	0.99952
vagina_64B	vagina_45B	1						vagina_80B	vagina_18B	0.99952
vagina_64B	vagina_46B	1						vagina_80B	vagina_34B	0.99952
vagina_64B	vagina_47B	1						vagina_80B	vagina_38B	0.99952
vagina_64B	vagina_48B	1						vagina_80B	vagina_40B	0.99952
vagina_64B	vagina_50B	0.99824						vagina_80B	vagina_63B	0.9968
vagina_64B	vagina_55B	1						vagina_80B	vagina_70B	0.9996
vagina_64B	vagina_60B	1						vagina_80B	vagina_72B	1
vagina_64B	vagina_65B	0.99984						vagina_80B	vagina_73B	0.9612
vagina_64B	vagina_67B	1
vagina_64B	vagina_68B	0.97344
vagina_64B	vagina_75B	1
vagina_74B	vagina_1B	0.99992
vagina_74B	vagina_2B	0.986
vagina_74B	vagina_3B	0.99472
vagina_74B	vagina_9B	0.98016
vagina_74B	vagina_13B	0.97592
vagina_74B	vagina_30B	0.9996
vagina_74B	vagina_37B	0.99936
vagina_74B	vagina_39B	0.9996
vagina_74B	vagina_45B	0.99936
vagina_74B	vagina_46B	0.99952
vagina_74B	vagina_47B	0.9996
vagina_74B	vagina_48B	0.99952
vagina_74B	vagina_50B	0.99952
vagina_74B	vagina_55B	0.99744
vagina_74B	vagina_60B	0.99952
vagina_74B	vagina_65B	0.99688
vagina_74B	vagina_67B	0.99952
vagina_74B	vagina_68B	0.99616
vagina_74B	vagina_75B	0.99624
vagina_76B	vagina_1B	0.99992
vagina_76B	vagina_2B	0.9968
vagina_76B	vagina_3B	0.98944
vagina_76B	vagina_9B	0.9784
vagina_76B	vagina_13B	0.99568
vagina_76B	vagina_30B	0.99016
vagina_76B	vagina_37B	0.99376
vagina_76B	vagina_39B	0.99376
vagina_76B	vagina_45B	0.99176
vagina_76B	vagina_46B	0.99288
vagina_76B	vagina_47B	0.98232
vagina_76B	vagina_48B	0.98008
vagina_76B	vagina_50B	0.93456
vagina_76B	vagina_55B	0.99648
vagina_76B	vagina_60B	0.99864
vagina_76B	vagina_65B	0.99872
vagina_76B	vagina_67B	0.99864
vagina_76B	vagina_68B	0.99776
vagina_76B	vagina_75B	0.99872
vagina_80B	vagina_1B	0.99576
vagina_80B	vagina_2B	1
vagina_80B	vagina_3B	0.99928
vagina_80B	vagina_9B	0.98888
vagina_80B	vagina_13B	0.99968
vagina_80B	vagina_30B	0.99952
vagina_80B	vagina_37B	0.99952
vagina_80B	vagina_39B	1
vagina_80B	vagina_45B	0.99952
vagina_80B	vagina_46B	0.99952
vagina_80B	vagina_47B	0.99952
vagina_80B	vagina_48B	0.99952
vagina_80B	vagina_50B	0.99952
vagina_80B	vagina_55B	1
vagina_80B	vagina_60B	1
vagina_80B	vagina_65B	1
vagina_80B	vagina_67B	1
vagina_80B	vagina_68B	0.99848
vagina_80B	vagina_75B	1

## Sheet: FIG3A
SubjectID1	SubjectID2	Distance		SubjectID1	SubjectID2	Distance		Mann Whitney test
rectum_10B	vagina_10B	0.674236		rectum_1B	vagina_1B	0.910682		P value	0.0266
rectum_22B	vagina_22B	0.519971		rectum_2B	vagina_2B	0.971817		Exact or approximate P value?	Exact
rectum_24B	vagina_24B	0.604107		rectum_3B	vagina_3B	0.924532		P value summary	*
rectum_25B	vagina_25B	0.872837		rectum_9B	vagina_9B	0.838022		Significantly different (P < 0.05)?	Yes
rectum_35B	vagina_35B	1.031		rectum_13B	vagina_13B	0.996811		One- or two-tailed P value?	Two-tailed
rectum_49B	vagina_49B	0.57342		rectum_30B	vagina_30B	0.962648		Sum of ranks in column A,B	1472 , 239
rectum_52B	vagina_52B	0.65945		rectum_37B	vagina_37B	0.999996		Mann-Whitney U	161
rectum_57B	vagina_57B	0.786912		rectum_39B	vagina_39B	0.80842
rectum_64B	vagina_64B	0.692915		rectum_45B	vagina_45B	0.969783		Difference between medians
rectum_74B	vagina_74B	0.873771		rectum_46B	vagina_46B	0.906592		Median of column A	0.89790910, n=46
rectum_76B	vagina_76B	0.766602		rectum_47B	vagina_47B	0.844993		Median of column B	0.72975881, n=12
rectum_80B	vagina_80B	0.939621		rectum_48B	vagina_48B	0.84155		Difference: Actual	0.16815
				rectum_50B	vagina_50B	0.911607		Difference: Hodges-Lehmann	0.124625
				rectum_55B	vagina_55B	0.898389		95.18% CI of difference	0.022281020 to 0.22884127
				rectum_60B	vagina_60B	0.9033		Exact or approximate CI?	Exact
				rectum_65B	vagina_65B	0.932652
				rectum_67B	vagina_67B	0.998325
				rectum_68B	vagina_68B	0.967463
				rectum_75B	vagina_75B	0.917618
				rectum_14B	vagina_14B	0.981625
				rectum_16B	vagina_16B	0.87622
				rectum_19B	vagina_19B	0.671381
				rectum_21B	vagina_21B	0.893347
				rectum_23B	vagina_23B	0.762816
				rectum_29B	vagina_29B	0.548434
				rectum_43B	vagina_43B	0.770797
				rectum_59B	vagina_59B	0.787581
				rectum_69B	vagina_69B	0.0875263
				rectum_71B	vagina_71B	0.924324
				rectum_79B	vagina_79B	0.839037
				rectum_5B	vagina_5B	0.909087
				rectum_7B	vagina_7B	0.936205
				rectum_11B	vagina_11B	0.976245
				rectum_12B	vagina_12B	0.921757
				rectum_15B	vagina_15B	0.869884
				rectum_17B	vagina_17B	0.725342
				rectum_18B	vagina_18B	0.919207
				rectum_34B	vagina_34B	0.923848
				rectum_38B	vagina_38B	0.897429
				rectum_40B	vagina_40B	0.857908
				rectum_63B	vagina_63B	0.199685
				rectum_70B	vagina_70B	0.681731
				rectum_72B	vagina_72B	0.655445
				rectum_73B	vagina_73B	0.849076
				rectum_28B	vagina_28B	0.820831
				rectum_31B	vagina_31B	0.878545

## Sheet: FIG3B
		LDA score	p-value
D_0__Bacteria_D_1__Firmicutes_D_2__Bacilli_D_3__Lactobacillales_D_4__Lactobacillaceae_D_5__Lactobacillus	LD	5.57966	1.17e-07
D_0__Bacteria_D_1__Firmicutes_D_2__Negativicutes_D_3__Selenomonadales_D_4__Veillonellaceae_D_5__Dialister	non-LD	3.80822	0.00084979
D_0__Bacteria_D_1__Firmicutes_D_2__Negativicutes_D_3__Selenomonadales_D_4__Veillonellaceae_D_5__Megasphaera	non-LD	3.97386	0.00010995
D_0__Bacteria_D_1__Firmicutes_D_2__Bacilli_D_3__Lactobacillales_D_4__Aerococcaceae_D_5__Aerococcus	non-LD	4.03444	0.00345233
D_0__Bacteria_D_1__Bacteroidetes_D_2__Bacteroidia_D_3__Bacteroidales_D_4__Prevotellaceae_D_5__Prevotella6	non-LD	4.1539	0.00482815
D_0__Bacteria_D_1__Fusobacteria_D_2__Fusobacteriia_D_3__Fusobacteriales_D_4__Leptotrichiaceae_D_5__Sneathia	non-LD	4.22134	0.00055887
D_0__Bacteria_D_1__Actinobacteria_D_2__Actinobacteria_D_3__Actinomycetales_D_4__Actinomycetaceae_D_5__Actinomyces	non-LD	4.63902	0.0403163
D_0__Bacteria_D_1__Firmicutes_D_2__Bacilli_D_3__Bacillales_D_4__FamilyXI_D_5__Gemella	non-LD	4.90559	0.0403163
D_0__Bacteria_D_1__Tenericutes_D_2__Mollicutes_D_3__Mycoplasmatales_D_4__Mycoplasmataceae_D_5__Mycoplasma	non-LD	4.97551	0.00522124
D_0__Bacteria_D_1__Actinobacteria_D_2__Coriobacteriia_D_3__Coriobacteriales_D_4__Atopobiaceae_D_5__Atopobium	non-LD	5.06021	3.66e-06
D_0__Bacteria_D_1__Actinobacteria_D_2__Coriobacteriia_D_3__Coriobacteriales_D_4__Eggerthellaceae_D_5__DNF00809	non-LD	5.08191	0.00055887
D_0__Bacteria_D_1__Actinobacteria_D_2__Actinobacteria_D_3__Bifidobacteriales_D_4__Bifidobacteriaceae_D_5__Gardnerella	non-LD	5.09191	0.00239278

## Sheet: FIG3B raw data
index	D_0__Bacteria;D_1__Acidobacteria;D_2__Acidobacteriia;D_3__Acidobacteriales;D_4__uncultured;__	D_0__Bacteria;D_1__Acidobacteria;D_2__Blastocatellia (Subgroup 4);D_3__Blastocatellales;D_4__Blastocatellaceae;D_5__Blastocatella	D_0__Bacteria;D_1__Acidobacteria;D_2__Blastocatellia (Subgroup 4);D_3__Blastocatellales;D_4__Blastocatellaceae;D_5__uncultured	D_0__Bacteria;D_1__Acidobacteria;D_2__Subgroup 18;D_3__uncultured bacterium;D_4__uncultured bacterium;D_5__uncultured bacterium	D_0__Bacteria;D_1__Acidobacteria;D_2__Subgroup 6;D_3__uncultured bacterium 259;D_4__uncultured bacterium 259;D_5__uncultured bacterium 259	D_0__Bacteria;D_1__Actinobacteria;D_2__Acidimicrobiia;D_3__Microtrichales;D_4__Ilumatobacteraceae;D_5__uncultured	D_0__Bacteria;D_1__Actinobacteria;D_2__Actinobacteria;D_3__Actinomycetales;D_4__Actinomycetaceae;D_5__Actinobaculum	D_0__Bacteria;D_1__Actinobacteria;D_2__Actinobacteria;D_3__Actinomycetales;D_4__Actinomycetaceae;D_5__Actinomyces	D_0__Bacteria;D_1__Actinobacteria;D_2__Actinobacteria;D_3__Actinomycetales;D_4__Actinomycetaceae;D_5__Actinotignum	D_0__Bacteria;D_1__Actinobacteria;D_2__Actinobacteria;D_3__Actinomycetales;D_4__Actinomycetaceae;D_5__Arcanobacterium	D_0__Bacteria;D_1__Actinobacteria;D_2__Actinobacteria;D_3__Actinomycetales;D_4__Actinomycetaceae;D_5__F0332	D_0__Bacteria;D_1__Actinobacteria;D_2__Actinobacteria;D_3__Actinomycetales;D_4__Actinomycetaceae;D_5__Mobiluncus	D_0__Bacteria;D_1__Actinobacteria;D_2__Actinobacteria;D_3__Actinomycetales;D_4__Actinomycetaceae;D_5__Varibaculum	D_0__Bacteria;D_1__Actinobacteria;D_2__Actinobacteria;D_3__Bifidobacteriales;D_4__Bifidobacteriaceae;D_5__Alloscardovia	D_0__Bacteria;D_1__Actinobacteria;D_2__Actinobacteria;D_3__Bifidobacteriales;D_4__Bifidobacteriaceae;D_5__Bifidobacterium	D_0__Bacteria;D_1__Actinobacteria;D_2__Actinobacteria;D_3__Bifidobacteriales;D_4__Bifidobacteriaceae;D_5__Gardnerella	D_0__Bacteria;D_1__Actinobacteria;D_2__Actinobacteria;D_3__Bifidobacteriales;D_4__Bifidobacteriaceae;D_5__Scardovia	D_0__Bacteria;D_1__Actinobacteria;D_2__Actinobacteria;D_3__Corynebacteriales;D_4__Corynebacteriaceae;D_5__Corynebacterium	D_0__Bacteria;D_1__Actinobacteria;D_2__Actinobacteria;D_3__Corynebacteriales;D_4__Corynebacteriaceae;D_5__Corynebacterium 1	D_0__Bacteria;D_1__Actinobacteria;D_2__Actinobacteria;D_3__Corynebacteriales;D_4__Corynebacteriaceae;D_5__Corynebacterium sp. NML 100378	D_0__Bacteria;D_1__Actinobacteria;D_2__Actinobacteria;D_3__Corynebacteriales;D_4__Corynebacteriaceae;D_5__Lawsonella	D_0__Bacteria;D_1__Actinobacteria;D_2__Actinobacteria;D_3__Corynebacteriales;D_4__Mycobacteriaceae;D_5__Mycobacterium	D_0__Bacteria;D_1__Actinobacteria;D_2__Actinobacteria;D_3__Corynebacteriales;D_4__Nocardiaceae;D_5__Nocardia	D_0__Bacteria;D_1__Actinobacteria;D_2__Actinobacteria;D_3__Corynebacteriales;D_4__Nocardiaceae;D_5__Rhodococcus	D_0__Bacteria;D_1__Actinobacteria;D_2__Actinobacteria;D_3__Corynebacteriales;D_4__Nocardiaceae;D_5__Williamsia	D_0__Bacteria;D_1__Actinobacteria;D_2__Actinobacteria;D_3__Frankiales;D_4__Geodermatophilaceae;D_5__Blastococcus	D_0__Bacteria;D_1__Actinobacteria;D_2__Actinobacteria;D_3__Frankiales;D_4__Geodermatophilaceae;D_5__Modestobacter	D_0__Bacteria;D_1__Actinobacteria;D_2__Actinobacteria;D_3__Frankiales;D_4__uncultured;D_5__uncultured bacterium	D_0__Bacteria;D_1__Actinobacteria;D_2__Actinobacteria;D_3__Kineosporiales;D_4__Kineosporiaceae;D_5__Kineosporia	D_0__Bacteria;D_1__Actinobacteria;D_2__Actinobacteria;D_3__Micrococcales;D_4__Beutenbergiaceae;__	D_0__Bacteria;D_1__Actinobacteria;D_2__Actinobacteria;D_3__Micrococcales;D_4__Brevibacteriaceae;D_5__Brevibacterium	D_0__Bacteria;D_1__Actinobacteria;D_2__Actinobacteria;D_3__Micrococcales;D_4__Dermabacteraceae;D_5__Dermabacter	D_0__Bacteria;D_1__Actinobacteria;D_2__Actinobacteria;D_3__Micrococcales;D_4__Dermacoccaceae;D_5__Kytococcus	D_0__Bacteria;D_1__Actinobacteria;D_2__Actinobacteria;D_3__Micrococcales;D_4__Intrasporangiaceae;D_5__Tetrasphaera	D_0__Bacteria;D_1__Actinobacteria;D_2__Actinobacteria;D_3__Micrococcales;D_4__Intrasporangiaceae;__	D_0__Bacteria;D_1__Actinobacteria;D_2__Actinobacteria;D_3__Micrococcales;D_4__Microbacteriaceae;D_5__Leifsonia	D_0__Bacteria;D_1__Actinobacteria;D_2__Actinobacteria;D_3__Micrococcales;D_4__Microbacteriaceae;D_5__Microbacterium	D_0__Bacteria;D_1__Actinobacteria;D_2__Actinobacteria;D_3__Micrococcales;D_4__Microbacteriaceae;D_5__Pseudoclavibacter	D_0__Bacteria;D_1__Actinobacteria;D_2__Actinobacteria;D_3__Micrococcales;D_4__Micrococcaceae;D_5__Arthrobacter	D_0__Bacteria;D_1__Actinobacteria;D_2__Actinobacteria;D_3__Micrococcales;D_4__Micrococcaceae;D_5__Kocuria	D_0__Bacteria;D_1__Actinobacteria;D_2__Actinobacteria;D_3__Micrococcales;D_4__Micrococcaceae;D_5__Micrococcus	D_0__Bacteria;D_1__Actinobacteria;D_2__Actinobacteria;D_3__Micrococcales;D_4__Micrococcaceae;D_5__Nesterenkonia	D_0__Bacteria;D_1__Actinobacteria;D_2__Actinobacteria;D_3__Micrococcales;D_4__Micrococcaceae;D_5__Rothia	D_0__Bacteria;D_1__Actinobacteria;D_2__Actinobacteria;D_3__Micrococcales;D_4__Micrococcaceae;__	D_0__Bacteria;D_1__Actinobacteria;D_2__Actinobacteria;D_3__Micrococcales;__;__	D_0__Bacteria;D_1__Actinobacteria;D_2__Actinobacteria;D_3__Propionibacteriales;D_4__Nocardioidaceae;D_5__Nocardioides	D_0__Bacteria;D_1__Actinobacteria;D_2__Actinobacteria;D_3__Propionibacteriales;D_4__Propionibacteriaceae;D_5__Cutibacterium	D_0__Bacteria;D_1__Actinobacteria;D_2__Actinobacteria;D_3__Propionibacteriales;D_4__Propionibacteriaceae;D_5__Microlunatus	D_0__Bacteria;D_1__Actinobacteria;D_2__Actinobacteria;D_3__Propionibacteriales;D_4__Propionibacteriaceae;D_5__Propionicicella
rectum_10B	0	0	0	0	0	0	0	8	16	0	0	132	0	0	315	39	0	0	0	0	15	0	0	0	0	0	0	0	0	0	0	0	0	0	0	0	0	0	0	0	0	0	0	0	0	0	12	0	0
rectum_11B	0	0	0	0	0	0	0	67	0	47	0	458	111	0	0	78	0	16	59	0	160	0	0	0	0	0	0	0	0	0	0	0	0	0	0	0	13	0	0	0	0	0	0	0	0	0	0	0	0
rectum_12B	0	0	0	0	0	0	0	154	0	75	0	0	20	0	252	16	0	0	303	0	0	0	0	0	0	0	0	0	0	0	0	0	0	0	0	0	2	0	0	28	0	0	0	61	0	0	0	0	0
rectum_13B	0	0	0	0	0	0	0	3	0	0	0	212	120	0	326	0	0	0	14	0	0	0	0	0	0	0	0	0	0	0	0	0	0	0	0	0	0	0	0	0	0	0	0	0	0	0	0	0	0
rectum_14B	0	0	0	0	0	0	0	0	0	0	0	15	5	0	214	63	0	0	6	0	21	0	0	0	0	0	0	0	0	0	0	0	0	0	0	0	0	0	0	0	0	0	0	0	0	0	0	0	0
rectum_15B	0	0	0	0	0	0	0	14	0	90	0	212	0	0	48	0	0	0	0	0	39	0	0	0	0	0	0	0	0	0	0	0	0	0	0	3	0	0	0	0	0	0	0	0	0	0	0	0	0
rectum_16B	0	0	0	0	0	0	0	30	14	51	0	0	93	0	6	0	0	40	103	0	0	0	0	0	0	0	0	0	0	0	0	0	0	0	0	0	0	0	0	0	0	0	0	8	0	0	0	0	0
rectum_17B	0	0	0	0	0	0	0	85	14	0	0	208	121	0	5	0	0	3	241	0	25	0	0	0	0	0	0	0	0	0	0	0	0	0	0	0	0	0	0	0	0	0	0	0	0	0	0	0	0
rectum_18B	0	0	0	0	0	0	0	33	0	18	0	18	25	0	357	0	0	11	73	0	37	0	0	0	0	0	0	0	0	0	0	0	0	0	0	0	0	0	0	0	0	0	0	0	0	0	0	0	0
rectum_19B	0	0	0	0	0	0	0	235	0	0	0	0	274	0	466	0	0	16	55	0	25	0	3	0	0	0	0	0	0	0	0	0	0	0	0	0	0	0	0	0	0	0	0	0	0	0	0	0	0
rectum_1B	0	0	0	16	0	0	0	330	0	0	0	549	428	79	293	0	0	0	0	0	13	7	0	0	0	0	0	0	0	0	0	0	0	0	0	0	18	0	0	0	0	0	5	6	0	0	3	0	0
rectum_21B	0	0	0	0	0	0	0	181	0	17	0	89	62	43	30	0	0	0	183	0	134	0	0	0	0	0	0	0	0	0	0	0	0	0	0	0	0	0	0	0	0	0	0	0	0	0	5	0	0
rectum_22B	0	0	0	0	0	0	0	132	0	0	0	0	34	0	217	2293	0	779	110	0	0	0	0	0	0	0	0	0	0	0	0	0	0	0	0	0	0	0	0	0	0	0	0	0	0	0	0	0	0
rectum_23B	0	0	0	0	0	0	0	75	10	0	0	0	142	0	168	12	0	82	174	0	45	0	0	0	0	0	0	0	0	0	0	0	0	0	0	0	0	0	0	0	0	0	0	0	0	0	14	0	0
rectum_24B	0	0	0	0	0	0	0	169	9	0	0	194	69	28	606	0	0	0	585	0	149	0	0	0	0	0	0	0	0	0	0	0	17	0	0	0	9	0	0	0	0	0	0	11	0	0	30	0	0
rectum_25B	0	0	0	0	0	0	0	29	0	0	0	0	6	0	105	0	0	83	147	0	69	0	0	0	0	0	0	0	0	0	0	0	0	0	0	0	32	0	0	0	0	0	25	0	12	0	21	0	0
rectum_28B	0	0	0	0	0	0	0	231	0	0	0	0	0	126	564	35	0	0	5	0	12	0	0	0	0	0	0	0	0	0	0	0	0	0	0	0	0	0	0	0	0	0	0	0	0	0	0	0	0
rectum_29B	0	0	39	0	0	0	0	12	0	0	0	0	0	0	64	14099	0	0	3	0	0	0	0	0	0	0	0	0	0	0	0	0	0	0	0	0	10	0	0	0	0	0	0	0	0	0	14	0	0
rectum_2B	0	0	0	0	0	0	0	53	13	0	0	460	314	0	850	0	0	0	4	0	50	0	0	0	0	0	0	0	0	0	0	0	0	0	0	0	3	3	0	0	0	0	0	0	0	0	0	0	0
rectum_30B	0	0	0	0	0	0	0	17	0	96	0	351	141	0	392	0	0	0	165	0	22	0	0	0	0	0	0	0	0	0	0	0	0	0	0	0	0	0	0	0	0	0	0	0	0	0	0	0	0
rectum_31B	0	0	0	0	0	0	111	481	0	108	0	116	333	0	14	1097	0	0	63	0	23	0	0	0	0	0	0	0	0	0	0	0	0	0	0	0	0	0	0	0	0	0	0	0	0	0	0	0	0
rectum_34B	0	0	0	0	3	0	0	12	0	0	0	5	0	0	202	0	0	15	55	0	25	0	0	0	0	0	0	0	0	0	32	0	0	0	0	0	0	0	0	0	0	0	0	0	0	0	6	0	0
rectum_35B	0	0	0	0	0	0	0	169	6	71	0	472	49	20	57	0	0	16	143	0	39	0	0	0	0	0	0	0	0	0	0	0	0	0	0	0	0	0	0	0	0	0	0	0	0	0	0	0	0
rectum_37B	0	0	0	0	0	0	0	62	0	47	0	279	108	0	22	0	0	0	97	0	34	0	0	0	0	0	0	0	0	0	0	0	0	0	0	0	0	0	0	0	0	0	0	0	0	0	0	0	0
rectum_38B	0	0	0	0	0	0	12	44	0	35	0	71	0	0	307	0	0	98	54	19	25	0	0	0	0	0	0	0	0	0	0	0	0	0	0	0	0	0	0	0	0	0	0	0	0	0	0	0	0
rectum_39B	0	0	0	0	0	0	0	80	0	78	0	134	254	0	1078	0	0	8	352	0	575	0	0	0	0	0	0	0	0	0	0	0	0	0	0	0	0	0	0	0	0	0	0	0	0	0	0	0	0
rectum_3B	0	0	0	0	0	0	0	126	0	0	0	259	10	0	392	218	0	175	338	0	199	0	0	0	0	0	0	0	0	0	0	0	0	0	0	0	12	0	0	0	0	0	0	0	0	0	0	0	0
rectum_40B	0	0	0	0	0	0	0	88	0	0	0	262	22	0	1206	0	0	6	3	0	38	0	0	0	0	0	0	0	0	0	0	0	0	0	0	0	0	0	0	0	0	0	0	0	0	0	0	0	0
rectum_43B	0	0	0	0	0	0	0	430	0	0	0	0	11	0	5	0	0	46	1577	0	60	0	0	0	3	0	0	0	0	0	0	0	0	0	0	0	0	0	0	0	0	0	0	0	0	0	0	0	0
rectum_45B	0	0	0	0	0	0	0	105	0	23	0	197	97	0	0	1683	0	0	0	0	0	0	0	0	0	0	0	0	0	0	0	0	0	0	0	0	0	0	0	0	0	0	0	0	0	0	0	0	0
rectum_46B	0	0	0	0	0	0	0	135	0	0	0	8	52	0	78	0	0	40	61	0	56	0	0	0	0	0	0	0	0	0	0	0	0	0	0	0	0	0	0	0	0	0	0	0	0	0	0	0	0
rectum_47B	0	0	0	0	0	0	0	91	58	0	0	0	80	0	155	0	0	117	11	0	25	0	0	0	0	0	0	0	0	0	0	0	0	0	0	0	3	0	0	0	0	0	0	0	0	0	0	0	0
rectum_48B	0	0	0	0	0	0	0	70	0	94	0	148	286	0	329	10	0	0	0	0	50	0	0	0	0	0	0	0	0	0	0	0	0	0	0	0	0	0	0	0	0	0	0	0	0	0	0	0	0
rectum_49B	0	0	0	0	0	0	0	84	0	0	0	441	100	0	0	4412	0	0	68	0	54	0	0	0	0	0	0	0	0	0	0	0	0	0	0	0	0	0	0	0	0	0	0	0	0	0	0	0	0
rectum_50B	0	0	0	0	0	0	0	2	0	0	0	0	13	0	1273	28	0	0	0	0	20	0	0	0	0	0	0	0	0	0	0	0	0	0	0	0	0	0	0	0	0	0	0	0	0	0	0	0	0
rectum_52B	0	0	0	0	0	0	0	3750	0	0	0	156	0	0	22	1122	0	270	4666	0	101	0	0	0	0	0	0	0	0	0	0	0	0	14	0	0	0	0	0	0	0	0	0	0	0	0	43	0	0
rectum_55B	0	0	0	0	0	0	0	603	0	0	0	1057	727	271	872	0	0	39	12	0	112	0	0	0	0	0	0	0	0	0	0	0	0	0	0	0	0	0	0	0	0	0	0	0	0	0	19	0	0
rectum_57B	0	0	0	0	0	0	0	945	0	23	0	0	108	0	699	2995	0	131	2823	40	155	0	0	0	0	0	0	0	0	0	0	0	0	0	0	0	0	0	0	0	9	0	0	0	0	0	143	0	0
rectum_59B	0	0	0	0	0	59	0	481	0	0	26	0	0	0	45	0	55	0	150	0	0	0	0	0	0	59	0	0	0	59	0	0	0	0	0	0	72	0	22	0	0	10	148	0	0	27	60	0	0
rectum_5B	6	0	0	0	0	0	6	1080	0	0	0	0	28	0	72	6	0	2575	712	0	400	6	0	0	0	0	0	0	0	0	0	51	0	0	0	0	0	0	0	0	0	0	0	0	0	0	0	0	0
rectum_60B	0	0	0	0	0	0	0	153	0	0	0	0	245	0	1653	0	0	55	125	0	65	0	0	0	0	0	0	0	0	0	0	0	0	0	0	0	0	0	0	0	0	0	0	0	0	0	0	0	0
rectum_63B	0	0	0	0	0	0	0	432	0	0	0	0	10	0	1254	697	0	69	1986	0	0	0	0	0	0	0	0	0	0	18	0	0	0	0	0	0	0	0	0	0	0	0	0	0	0	0	13	0	4
rectum_64B	0	0	0	0	0	0	14	141	0	149	0	164	125	0	129	2047	0	0	327	0	64	0	0	0	0	0	0	0	0	0	4	0	0	0	0	0	0	0	0	0	12	0	0	0	0	0	11	0	0
rectum_65B	0	0	0	0	0	0	0	49	0	0	0	31	30	41	1675	0	0	70	98	0	16	0	0	0	0	0	0	0	0	0	0	0	0	0	0	0	0	0	0	0	0	0	0	0	0	0	0	0	0
rectum_67B	0	0	0	0	0	0	0	19	0	0	0	0	85	0	1013	0	0	11	10	0	39	0	0	0	0	0	0	0	0	0	0	0	0	0	0	0	0	0	0	0	0	0	0	0	0	0	0	0	0
rectum_68B	0	0	0	0	0	0	0	155	6	0	0	135	484	0	1920	21	0	0	59	0	49	0	0	0	0	0	0	0	0	0	0	0	0	0	0	0	0	0	0	0	0	0	0	0	0	0	38	0	0
rectum_69B	0	0	0	0	0	0	0	62	0	0	0	0	0	0	0	17827	0	0	49	0	0	0	0	0	0	0	0	0	0	0	0	0	0	0	0	0	0	0	0	0	0	0	0	0	0	0	0	0	0
rectum_70B	0	0	0	0	0	0	7	311	0	73	0	310	113	0	38	6833	0	86	131	0	17	0	0	0	0	0	5	0	0	0	0	0	0	0	0	0	0	0	0	0	0	0	0	0	0	0	0	0	0
rectum_71B	0	0	0	0	0	0	0	992	0	0	0	0	884	0	49	677	0	0	97	0	168	0	0	0	0	0	0	0	0	0	0	0	0	0	0	0	0	0	0	0	0	0	0	0	0	0	0	0	0
rectum_72B	0	0	0	0	0	0	0	220	0	0	0	0	30	0	1389	1124	0	10	1124	0	0	0	0	0	0	0	0	0	0	0	0	0	0	0	0	0	0	0	0	9	0	0	0	0	0	0	51	0	0
rectum_73B	0	0	0	0	0	0	0	0	0	0	0	9	149	0	1058	53	0	0	9	0	33	0	0	0	0	0	0	0	0	0	0	0	0	0	0	0	0	0	0	0	0	0	0	0	0	0	0	0	0
rectum_74B	0	0	0	0	0	0	0	32	0	0	0	0	77	0	0	0	0	0	39	0	6	0	0	0	0	0	0	0	0	0	0	0	0	0	0	0	0	0	0	0	0	0	5	0	0	0	0	0	0
rectum_75B	0	0	0	0	0	0	0	584	0	61	0	0	67	0	1476	0	0	154	75	0	0	0	0	0	0	0	0	0	0	0	0	0	0	0	0	0	0	0	0	0	0	0	0	0	0	0	122	5	0
rectum_76B	0	0	0	0	0	0	0	939	0	0	0	85	40	77	182	0	0	0	5229	0	163	0	0	0	0	0	0	0	0	6	0	0	0	0	16	0	0	0	0	0	0	0	0	0	0	0	152	0	0
rectum_79B	0	0	0	0	0	0	5	889	86	163	0	171	407	0	1043	0	0	0	152	0	182	0	0	0	0	0	0	0	0	0	0	0	0	0	0	0	0	0	0	0	0	0	0	0	0	0	24	0	0
rectum_7B	0	0	0	0	0	0	0	94	0	17	0	11	26	0	399	0	0	0	0	0	15	0	0	0	0	0	0	0	0	0	0	0	0	0	0	0	0	0	0	0	0	0	0	0	0	0	0	0	0
rectum_80B	0	0	0	0	0	0	0	45	0	10	0	328	971	0	123	0	0	0	0	0	278	0	0	0	0	0	0	0	0	0	0	0	0	0	0	0	0	0	0	0	0	0	0	0	0	0	0	0	0
rectum_9B	0	0	0	0	0	0	0	114	0	30	0	163	70	0	19	1202	0	23	0	0	2	0	0	0	0	0	0	0	0	0	0	0	0	0	0	0	0	0	0	0	0	0	0	0	0	0	0	0	0
vagina_10B	0	0	0	0	0	0	0	0	3	0	0	0	0	0	0	6368	0	0	0	0	0	0	0	0	0	0	0	0	0	0	0	0	0	0	0	0	0	0	0	0	0	0	0	0	0	0	0	0	0
vagina_11B	0	0	0	0	0	0	0	0	0	0	0	0	0	0	0	0	0	0	0	0	0	0	0	3	0	0	0	0	0	0	0	0	0	0	0	0	4	0	0	0	0	0	0	0	0	0	0	0	0
vagina_12B	0	0	0	0	0	0	0	0	0	0	0	0	0	0	0	0	0	0	0	0	0	0	0	0	0	0	0	0	0	0	0	0	0	0	0	0	0	0	0	0	0	0	0	74	0	0	0	0	0
vagina_13B	0	0	0	0	0	0	0	0	0	0	0	0	0	0	0	568	0	0	2	0	0	0	0	0	0	0	0	0	0	0	0	0	0	0	0	0	0	0	0	0	0	0	0	0	0	0	0	0	0
vagina_14B	0	0	0	0	0	0	0	0	0	0	0	0	0	0	0	15730	0	0	0	0	0	0	0	0	0	0	0	0	0	0	0	0	0	0	0	0	0	0	0	0	0	0	0	12	0	0	34	0	0
vagina_15B	0	0	0	0	0	0	0	0	0	0	0	0	0	0	0	0	0	0	0	0	0	0	0	0	0	0	0	0	0	0	0	0	0	0	0	0	0	0	0	0	0	0	0	0	0	0	0	0	0
vagina_16B	0	0	0	0	0	0	0	0	0	0	0	0	0	0	0	0	0	0	0	0	0	0	0	0	0	0	0	0	0	0	0	0	0	0	0	0	0	0	0	0	0	0	0	0	0	0	0	0	0
vagina_17B	0	0	0	0	0	0	0	0	0	0	0	0	0	0	0	0	0	0	0	0	0	0	0	0	0	0	0	0	0	0	0	0	0	0	0	0	0	0	0	0	0	0	0	0	0	0	0	0	0
vagina_18B	0	0	0	0	0	0	0	0	0	0	0	0	0	0	0	0	0	0	0	0	0	0	0	0	0	0	0	0	0	0	0	0	0	0	0	0	7	0	0	0	0	0	0	0	0	0	0	0	0
vagina_19B	0	0	0	0	0	0	0	0	0	0	0	0	0	0	651	0	0	0	0	0	0	0	0	0	0	0	0	0	0	0	0	0	0	0	0	0	0	0	0	0	0	0	0	0	0	0	0	0	0
vagina_1B	0	0	0	0	0	0	0	0	0	0	0	0	0	0	0	0	0	0	0	0	0	0	0	0	0	0	0	0	0	0	0	0	0	0	0	0	0	0	0	0	0	0	0	17	0	0	0	0	0
vagina_21B	0	0	0	0	0	0	0	0	0	0	0	0	0	0	1561	0	0	0	0	0	0	0	0	0	0	0	0	0	0	0	0	0	0	0	0	0	0	0	0	0	0	0	0	11	0	0	6	0	0
vagina_22B	0	0	0	0	0	0	0	72	0	0	0	0	17	0	0	7446	0	0	0	0	10	0	0	0	0	0	0	0	0	0	0	0	0	0	0	0	0	0	0	0	0	0	0	0	0	0	0	0	0
vagina_23B	0	0	0	0	0	0	0	0	0	0	0	0	0	0	21	1008	0	0	0	0	0	0	0	0	0	0	0	0	0	0	0	0	0	0	0	0	0	0	0	0	0	0	0	0	0	0	0	0	0
vagina_24B	0	0	0	0	0	0	0	0	0	0	0	0	0	0	1813	0	0	0	0	0	0	0	0	0	0	0	0	0	0	0	0	0	0	0	0	0	27	0	0	0	0	0	0	20	0	0	156	0	0
vagina_25B	0	0	0	0	0	0	0	0	0	0	0	0	0	0	7	0	0	0	0	0	0	0	0	0	0	0	0	0	0	0	0	0	0	0	0	0	0	0	0	0	0	0	0	0	0	0	0	0	0
vagina_28B	0	0	0	0	0	0	0	0	0	0	0	0	0	0	577	5	0	0	0	0	0	0	0	0	0	0	0	0	0	0	0	0	0	0	0	0	0	0	0	0	0	0	0	0	0	0	0	0	0
vagina_29B	0	0	0	0	0	0	0	0	0	0	0	0	0	0	0	9764	0	0	0	0	0	0	0	0	0	0	0	0	0	0	0	0	0	0	0	0	0	0	0	0	0	0	0	0	0	0	0	0	0
vagina_2B	0	0	0	0	0	0	0	0	0	0	0	0	0	0	0	0	0	0	0	0	0	0	0	0	0	0	0	0	0	0	0	0	0	0	0	0	0	0	0	0	0	0	0	0	0	0	0	0	0
vagina_30B	0	0	0	0	0	0	0	0	0	0	0	0	0	0	0	0	0	0	0	0	0	0	0	0	0	0	0	0	0	0	0	0	0	0	0	0	0	0	0	0	0	0	0	0	0	0	0	0	0
vagina_31B	0	0	0	0	0	0	0	0	0	0	0	0	0	0	8	7735	0	0	0	0	0	0	0	0	0	0	0	0	0	0	0	0	0	0	0	0	0	0	0	0	0	0	0	0	0	0	0	0	0
vagina_34B	0	0	0	0	0	0	0	0	0	0	0	0	0	0	0	0	0	0	0	0	0	0	0	0	0	0	0	0	0	0	0	0	0	0	0	0	0	0	0	0	0	0	0	0	0	0	0	0	0
vagina_35B	0	0	0	0	0	0	0	0	0	0	0	0	0	0	15156	0	0	0	0	0	0	0	0	0	0	0	0	0	0	0	0	0	0	0	0	0	0	0	0	0	0	0	0	0	0	0	0	0	0
vagina_37B	0	0	0	0	0	0	0	6	0	0	0	0	0	0	0	3	0	0	2	0	0	0	0	0	0	0	0	0	0	0	0	0	0	0	0	0	0	0	0	3	0	0	0	5	6	0	0	0	0
vagina_38B	0	0	0	0	0	0	0	0	0	0	0	0	0	0	9	0	0	0	0	0	0	0	0	0	0	0	0	0	0	0	0	0	0	0	0	0	0	0	0	0	0	0	0	0	0	0	0	0	0
vagina_39B	0	0	0	0	0	0	0	0	0	0	0	0	0	0	2368	0	0	0	0	0	0	0	0	0	0	0	0	0	0	0	0	0	0	0	0	0	0	0	0	0	0	0	0	0	0	0	0	0	0
vagina_3B	0	0	0	0	0	0	0	0	0	0	0	0	0	0	0	0	0	0	5	0	0	0	0	0	0	0	0	0	0	0	0	0	0	0	0	0	5	0	0	0	0	0	0	0	0	0	12	0	0
vagina_40B	0	0	0	0	0	0	0	0	0	0	0	0	0	0	0	0	0	0	0	0	0	0	0	0	0	0	0	0	0	0	0	0	0	0	0	0	0	0	0	0	0	0	0	0	0	0	0	0	0
vagina_43B	0	0	0	0	0	0	0	0	0	0	0	0	0	0	0	0	0	0	0	0	0	0	0	0	0	0	0	0	0	0	0	0	0	0	0	0	0	0	0	0	0	0	0	0	0	0	0	0	0
vagina_45B	0	0	0	0	0	0	0	0	0	0	0	0	0	0	0	0	0	0	0	0	0	0	0	0	0	0	0	0	0	0	0	0	0	0	0	0	0	0	0	0	0	0	0	0	0	0	0	0	0
vagina_46B	0	0	0	0	0	0	0	0	0	0	0	0	0	0	0	0	0	0	0	0	0	0	0	0	0	0	0	0	0	0	0	0	0	0	0	0	0	0	0	0	0	0	0	0	0	0	0	0	0
vagina_47B	0	0	0	0	0	0	0	0	0	0	0	0	0	0	5960	0	0	0	0	0	0	0	0	0	0	0	0	0	0	0	0	0	0	0	0	0	0	0	0	0	0	0	0	0	0	0	0	0	0
vagina_48B	0	0	0	0	0	0	0	0	0	0	0	0	0	0	0	0	0	0	0	0	0	0	0	0	0	0	0	0	0	0	0	0	0	0	0	0	0	0	0	0	0	0	0	0	0	0	0	0	0
vagina_49B	0	0	0	0	0	0	0	0	0	0	0	0	0	0	0	16935	0	0	0	0	0	0	0	0	0	0	0	0	0	0	0	0	0	0	0	0	0	0	0	0	0	0	0	0	0	0	0	0	0
vagina_50B	0	0	0	0	0	0	0	0	0	0	0	0	0	0	11	0	0	0	0	0	0	0	0	0	0	0	0	0	0	0	0	0	0	0	0	0	0	0	0	0	0	0	0	0	0	0	0	0	0
vagina_52B	0	0	0	0	0	0	0	0	0	0	0	0	0	0	0	18525	0	0	0	0	0	0	0	0	0	0	0	0	0	0	0	0	0	0	0	0	0	0	0	0	0	0	0	0	0	0	0	0	0
vagina_55B	0	0	0	0	0	0	0	0	0	0	0	0	0	0	0	0	0	0	5	0	0	0	0	0	0	0	0	0	0	0	0	0	0	0	0	0	0	0	0	0	0	0	0	0	0	0	0	0	0
vagina_57B	0	0	0	0	0	0	0	0	0	0	0	0	0	0	0	18343	0	0	0	0	0	0	0	0	0	0	0	0	0	0	0	0	0	0	0	0	0	0	0	0	0	0	0	0	0	0	0	0	0
vagina_59B	0	0	0	0	0	0	0	0	0	0	0	0	0	0	932	0	0	0	0	0	0	0	0	0	0	0	0	0	0	0	0	0	0	0	0	0	0	0	0	0	0	0	0	0	0	0	7	0	0
vagina_5B	0	0	0	0	0	0	0	0	0	0	0	0	0	0	0	0	0	3	18	0	0	0	0	0	0	0	0	0	0	0	0	0	0	0	0	0	0	0	0	0	0	0	0	0	0	0	0	0	0
vagina_60B	0	0	0	0	0	0	0	0	0	0	0	0	0	0	0	0	0	0	0	0	0	0	0	0	0	0	0	0	0	0	0	0	0	0	0	0	0	0	0	0	0	0	0	0	0	0	0	0	0
vagina_63B	0	0	0	0	0	0	0	0	0	0	0	0	0	0	0	3152	0	0	0	0	0	0	0	0	0	0	0	0	0	0	0	0	0	0	0	0	0	0	0	0	0	0	0	0	0	0	0	0	0
vagina_64B	0	0	0	0	0	0	0	55	0	36	0	94	0	0	0	11112	0	0	0	0	0	0	0	0	0	0	0	0	0	0	0	0	0	0	0	0	0	0	0	0	0	0	0	0	0	0	0	0	0
vagina_65B	0	0	0	0	0	0	0	0	0	0	0	0	0	0	0	0	0	0	0	0	0	0	0	0	0	0	0	0	0	0	0	0	0	0	0	0	0	0	0	0	0	0	0	0	0	0	0	0	0
vagina_67B	0	0	0	0	0	0	0	0	0	0	0	0	0	0	0	0	0	0	0	0	0	0	0	0	0	0	0	0	0	0	0	0	0	0	0	0	0	0	0	0	0	0	0	0	0	0	2	0	0
vagina_68B	0	0	0	0	0	0	0	0	0	0	0	0	0	0	0	730	0	0	0	0	0	0	0	0	0	0	0	0	0	0	0	0	0	0	0	0	0	0	0	0	0	0	0	0	0	0	0	0	0
vagina_69B	0	0	0	0	0	0	0	0	0	0	0	0	0	0	0	15279	0	0	0	0	0	0	0	0	0	0	0	0	0	0	0	0	0	0	0	0	0	0	0	0	0	0	0	0	0	0	0	0	0
vagina_70B	0	0	0	0	0	0	0	0	0	0	0	0	0	0	0	11143	0	0	0	0	0	0	0	0	0	0	0	0	0	0	0	0	0	0	0	0	0	0	0	0	0	0	0	0	0	0	0	0	0
vagina_71B	0	0	0	0	0	0	0	0	0	0	0	0	0	0	0	8661	0	0	0	0	0	0	0	0	0	0	0	0	0	0	0	0	0	0	0	0	0	0	0	0	0	0	0	0	0	0	0	0	0
vagina_72B	0	0	0	0	0	0	0	0	0	0	0	0	0	0	0	0	0	0	0	0	0	0	0	0	0	0	0	0	2	0	0	0	0	0	0	0	0	0	0	0	0	0	0	0	0	0	0	0	0
vagina_73B	0	0	0	0	0	0	0	0	0	0	0	0	0	0	0	10635	0	0	0	0	0	0	0	0	0	0	0	0	0	0	0	0	0	0	0	0	0	0	0	0	0	0	0	0	0	0	0	0	0
vagina_74B	0	0	0	0	0	0	0	0	0	0	0	0	0	0	0	4475	0	0	0	0	0	0	0	0	0	0	0	0	0	0	0	0	0	0	0	0	0	0	0	0	0	0	0	0	0	0	0	0	0
vagina_75B	0	4	0	0	0	0	0	0	0	0	0	0	0	0	0	0	0	0	0	0	0	0	0	0	0	0	0	3	0	0	0	0	0	0	0	0	0	0	0	0	0	0	0	0	0	0	0	0	0
vagina_76B	0	0	0	0	0	0	0	0	0	0	0	0	0	0	46	0	0	0	0	0	0	0	0	0	0	0	0	0	0	0	0	0	0	0	0	0	0	0	0	0	0	0	0	0	7	0	63	0	0
vagina_79B	0	0	0	0	0	0	0	0	0	0	0	0	0	0	8687	0	0	0	0	0	0	0	0	0	0	0	0	0	0	0	0	0	0	0	0	0	0	0	0	0	0	0	0	0	0	0	0	0	0
vagina_7B	0	0	0	0	0	0	0	0	0	0	0	0	0	0	0	0	0	0	0	0	0	0	0	0	0	0	0	0	0	0	0	0	0	0	0	0	0	0	0	0	0	0	0	0	0	0	0	0	0
vagina_80B	0	0	0	0	0	0	0	0	0	0	0	0	0	0	0	12675	0	0	0	0	0	0	0	0	0	0	0	0	0	0	0	0	0	0	0	0	0	0	0	0	0	0	0	0	0	0	0	0	0
vagina_9B	0	0	0	0	0	0	0	0	0	0	0	0	0	0	0	5186	0	0	0	0	0	0	0	0	4	0	0	0	0	0	0	0	0	0	0	0	0	0	0	0	0	0	0	0	0	0	0	0	0
[truncated: 413 more columns]

## Sheet: FIG3C-1
Name	r	p-value		BLAST Top hit (species)	type	Aerococcus christensenii_rectum	Atopobium vaginae_rectum	Gardnerella leopoldii_rectum	Gardnerella vaginalis_rectum	Gemella asaccharolytica_rectum	Mycoplasma hominis_rectum	Sneathia amnii_rectum	Sneathia sanguinegens_rectum	Aerococcus christensenii_vagina	Atopobium vaginae_vagina	Gardnerella leopoldii_vagina	Gardnerella vaginalis_vagina	Gemella asaccharolytica_vagina	Mycoplasma hominis_vagina	Sneathia amnii_vagina	Sneathia sanguinegens_vagina
Mycoplasma hominis (s)	1	0		10B	non-LD	0	0.570503	0	0.274687	0.323989	0	0	0.345119	0.105152	4.16667	3.26411	24.6363	0.525762	0	0	4.10095
Gemella asaccharolytica (s)	0.793754	1.07175e-13		11B	LD	0	0	0	0.427632	0	0	0	0	0	0	0	0	0	0	0	0
Sneathia sanguinegens (s)	0.793754	1.07175e-13		12B	LD	0	0.204575	0	0.0991879	0	0	0	0	0	0	0	0	0	0	0	0
Gardnerella leopoldii (s)	0.769463	1.70213e-12		13B	LD	0	0	0	0	0	0	0	0	0	0	0	2.19313	0	0	0	0
Sneathia amnii (s)	0.706108	5.95982e-10		14B	LD	0.0534759	0	0	0.481283	0	0	0	0	0.0499893	0	0	56.1665	0	0	0	0
Atopobium vaginae (s)	0.655792	2.30604e-08		15B	LD	0	0	0	0	0	0	0	0	0	0	0	0	0	0	0	0
Gardnerella vaginalis (s)	0.643824	4.98523e-08		16B	LD	0	0	0	0	0	0	0	0	0	0	0	0	0	0	0	0
Aerococcus christensenii (s)	0.547025	8.86791e-06		17B	LD	0	0	0	0	0	0	0	0	0	0	0	0	0	0	0	0
				18B	LD	0	0	0	0	0	0	0	0	0	0	0	0	0	0	0	0
				19B	LD	0	0	0	0	0	0	0	0	0	0	0	0	0	0	0	0
				1B	LD	0	0.620201	0	0	0	0	0	0	0	0	0	0	0	0	0	0
				21B	LD	0	0	0	0	0	0	0	0	0	0	0	0	0	0	0	0
				22B	non-LD	0.553221	2.61905	3.41036	12.6471	0	0.560224	0.329132	0	1.70217	9.41835	9.37603	25.636	0	0.77585	10.3118	0
				23B	LD	0.0236435	0.106396	0	0.0709304	0	0	0	0	0.0366367	2.83477	0	4.61623	0	0	0	0
				24B	non-LD	0	10.8152	0	0	0	0	0	0	0	39.4446	0	0	0	0	0	0
				25B	non-LD	0	1.33582	0	0	0	0	0	0	0	63.3628	0	0	0	0	0	0
				28B	LD	0	0.222793	0.199943	0	0	0	0	0	0	4.13768	0.0168062	0	0	0	0	0
				29B	LD	0	4.08854	11.7085	30.5218	0	0	0.167735	0	0	0	12.6189	21.654	0	0	0	0
				2B	LD	0	0	0	0	0	0	0	0	0	0	0	0	0	0	0	0
				30B	LD	0	0	0	0	0	0	0	0	0	0	0	0	0	0	0	0
				31B	LD	0	0	0	6.6505	0	0	0	0	0	0	0	24.6165	0	0	0	0
				34B	LD	0	0	0	0	0	0	0	0	0	0	0	0	0	0	0	0
				35B	non-LD	0	0	0	0	0	0	0	0	0	0	0	0	0	0	0	0
				37B	LD	0	0	0	0	0	0	0	0	0	0	0	0.0123523	0	0	0	0
				38B	LD	0	0	0	0	0	0	0	0	0	0	0	0	0	0	0	0
				39B	LD	0	0	0	0	0	0	0	0	0	0	0	0	0	0	0	0
				3B	LD	0	0.89955	0	1.16727	0	0	0	0	0	0	0	0	0	0	0	0
				40B	LD	0	0	0	0	0	0	0	0	0	0	0	0	0	0	0	0
				43B	LD	0	0	0	0	0	0	0	0	0	0	0	0	0	0	0	0
				45B	LD	0	6.06153	0.37757	8.2096	0	0	0	0	0	0	0	0	0	0	0	0
				46B	LD	0	0	0	0	0	0	0	0	0	0	0	0	0	0	0	0
				47B	LD	0	0	0	0	0	0	0	0	0	0	0	0	0	0	0	0
				48B	LD	0	0	0	0.0418148	0	0	0	0	0	0	0	0	0	0	0	0
				49B	non-LD	1.11791	1.71553	0	31.0202	0	0	0	0	8.42465	9.18699	0	73.353	0	0	0	0
				50B	LD	0	0	0	0.141193	0	0	0	0	0	0	0	0	0	0	0	0
				52B	non-LD	0	1.03728	1.96132	3.1209	0	0	0	0	0	45.1902	20.2876	33.96	0	0	0	0
				55B	LD	0	0	0	0	0	0	0	0	0	0	0	0	0	0	0	0
				57B	non-LD	0	2.00097	0	9.65951	0	0	0	0	0	46.9728	0	51.7025	0	0	0	0
				59B	LD	0	0	0	0	0	0	0	0	9.29054	0	0	0	0	0	0	0
				5B	LD	0	0	0	0.0430077	0	0	0	0	0	0	0	0	0	0	0	0
				60B	LD	0	0	0	0	0	0	0	0	0	0	0	0	0	0	0	0
				63B	LD	0	0	0	1.94059	0	0	0	0	0	0	0	9.13756	0	0	0	0
				64B	non-LD	0.551465	0.65347	1.59383	4.93131	0.427146	0.178509	6.64627	0.401645	2.17661	3.34058	11.5698	31.5434	0.174595	0.0775976	1.14844	0.62854
				65B	LD	0	0.107009	0	0	0	0	0	0	0	0.017403	0	0	0	0	0	0
				67B	LD	0	0	0	0	0	0	0	0	0	0	0	0	0	0	0	0
				68B	LD	0	0.0799361	0	0.0645637	0	0	0	0	0	0.0423857	0.421839	1.05157	0	0	0	0
				69B	LD	0	0	0	48.0732	0	0	0	0	0	0.00870499	0	44.3287	0	0	0	0
				70B	LD	0.264932	5.63964	0	17.9236	0.828896	0	1.75485	0.78168	0	1.37342	0	34.0089	0	0	0	0
				71B	LD	0	0	0	2.0221	0	0	0	0	0	0	0	25.9649	0	0	0	0
				72B	LD	0	0.0394506	1.24449	2.78664	0	0	0	0	0	0	0	0	0	0	0	0
				73B	LD	0	0	0.166557	0	0	0	0	0	0.800477	0.220196	9.97358	17.5768	0	0	0	0
				74B	non-LD	0	0	0	0	0	0	0	0	0	57.7782	0	16.8804	0	0	0	0
				75B	LD	0	0	0	0	0	0	0	0	0	0	0	0	0	0	0	0
				76B	non-LD	0	0	0	0	0	0	0	0	0	0	0	0	0	0	0	0
				79B	LD	0	0	0	0	0	0	0	0	0	0	0	0	0	0	0	0
				7B	LD	0	0	0	0	0	0	0	0	0	0	0	0	0	0	0	0
				80B	non-LD	0	0	0	0	0	0	0	0	16.5133	0	0	60.111	0	0	0	0
				9B	LD	0.68405	2.26944	2.94544	6.72783	0	0	0	0	0	0.508607	7.16745	13.1221	0	0	0	0

## Sheet: FIG3C-2
#ASV ID	BLAST Top hit (species)	Coverage	Identity	sequence	silva categorical	rectum_10B	rectum_11B	rectum_12B	rectum_13B	rectum_14B	rectum_15B	rectum_16B	rectum_17B	rectum_18B	rectum_19B	rectum_1B	rectum_21B	rectum_22B	rectum_23B	rectum_24B	rectum_25B	rectum_28B	rectum_29B	rectum_2B	rectum_30B	rectum_31B	rectum_34B	rectum_35B	rectum_37B	rectum_38B	rectum_39B	rectum_3B	rectum_40B	rectum_43B	rectum_45B	rectum_46B	rectum_47B	rectum_48B	rectum_49B	rectum_50B	rectum_52B	rectum_55B	rectum_57B	rectum_59B	rectum_5B	rectum_60B	rectum_63B	rectum_64B	rectum_65B
3a733fecb95a5068e97cd8d1ae0f9a3b	Aerococcus christensenii			AGGGTTTGATCATGGCTCAGGACGAACGCTGGCGGCGTGCCTAATACATGCAAGTCGAGCGAACAGAGAAAGTGCTTGCACTTTCAAAGTTAGCGGCGGACGGGTGAGTAACACGTAAGGAACCTACCGGTAAGCGGGGGACAACATCCGGAAACGGGTGCTAATACCGCATAGGAAGTTTGTTCGCATGAACAAACTTAGAAAGATGGCTCTGCTATCACTTATCGATGGCCTTGCGGTGCATTAACTAGTTGGCGAGGTAACGGCTCACCAAGGTGATGATGCATAGCCGACCTGAGAGGGTAATCGGCCACATTGGGACTGAGACACGGCCCAAACTCCTACGGGAGGCAGCA	D_0__Bacteria;D_1__Firmicutes;D_2__Bacilli;D_3__Lactobacillales;D_4__Aerococcaceae;D_5__Aerococcus;D_6__Aerococcus christensenii	0	0	0	0	0	0	0	0	0	0	0	0	0	0	0	0	0	0	0	0	0	0	0	0	0	0	0	0	0	0	0	0	0	0	0	0	0	0	0	0	0	0	0	0
5084181f35106ef8a2641484c9412b74	Aerococcus christensenii			AGGGTTTGATTATGGCTCAGGACGAACGCTGGCGGCGTGCCTAATACATGCAAGTCGAGCGAACAGAGAAAGTGCTTGCACTTTCAAAGTTAGCGGCGGACGGGTGAGTAACACGTAAGGAACCTACCGATAAGCGGGGGACAACATCCGGAAACGGGTGCTAATACCGCATAGGAAGTTTGTTCGCATGAACAAACTTAGAAAGATGGCTCTGCTATCACTTATCGATGGCCTTGCGGTGCATTAACTAGTTGGCGAGGTAACGGCTCACCAAGGTGATGATGCATAGCCGACCTGAGAGGGTAATCGGCCACATTGGGACTGAGACACGGCCCAAACTCCTACGGGAGGCAGCA	D_0__Bacteria;D_1__Firmicutes;D_2__Bacilli;D_3__Lactobacillales;D_4__Aerococcaceae;D_5__Aerococcus;D_6__Aerococcus christensenii	0	0	0	0	0	0	0	0	0	0	0	0	0.553221	0	0	0	0	0	0	0	0	0	0	0	0	0	0	0	0	0	0	0	0	0.555438	0	0	0	0	0	0	0	0	0.337892	0
6ad25e5d437d05818fc99e35c0b7a390	Aerococcus christensenii			AGAGTTTGATTATGGCTCAGGACGAACGCTGGCGGCGTGCCTAATACATGCAAGTCGAGCGAACAGAGAAAGTGCTTGCACTTTCAAAGTTAGCGGCGGACGGGTGAGTAACACGTAAGGAACCTACCGATAAGCGGGGGACAACATCCGGAAACGGGTGCTAATACCGCATAGGAAGTTTGTTCGCATGAACAAACTTAGAAAGATGGCTCTGCTATCACTTATCGATGGCCTTGCGGTGCATTAACTAGTTGGCGAGGTAACGGCTCACCAAGGTGATGATGCATAGCCGACCTGAGAGGGTAATCGGCCACATTGGGACTGAGACACGGCCCAAACTCCTACGGGAGGCAGCA	D_0__Bacteria;D_1__Firmicutes;D_2__Bacilli;D_3__Lactobacillales;D_4__Aerococcaceae;D_5__Aerococcus;D_6__Aerococcus christensenii	0	0	0	0	0.0534759	0	0	0	0	0	0	0	0	0.0236435	0	0	0	0	0	0	0	0	0	0	0	0	0	0	0	0	0	0	0	0.562469	0	0	0	0	0	0	0	0	0.213573	0
8b4055fd775178d1e22357f862863783	Aerococcus christensenii			AGGGTTTGATTATGGCTCAGGACGAACGCTGGCGGCGTGCCTAATACATGCAAGTCGAGCGAACAGAGAAAGTGTTTGCACTTTCAAAGTTAGCGGCGGACGGGTGAGTAACACGTAAGGAACCTACCGATAAGCGGGGGACAACATCCGGAAACGGGTGCTAATACCGCATAGGAAGTTTGTTCGCATGAACAAACTTAGAAAGATGGCTCTGCTATCACTTATCGATGGCCTTGCGGTGCATTAACTAGTTGGCGAGGTAACGGCTCACCAAGGTGATGATGCATAGCCGACCTGAGAGGGTAATCGGCCACATTGGGACTGAGACACGGCCCAAACTCCTACGGGAGGCAGCA	D_0__Bacteria;D_1__Firmicutes;D_2__Bacilli;D_3__Lactobacillales;D_4__Aerococcaceae;D_5__Aerococcus;D_6__Aerococcus christensenii	0	0	0	0	0	0	0	0	0	0	0	0	0	0	0	0	0	0	0	0	0	0	0	0	0	0	0	0	0	0	0	0	0	0	0	0	0	0	0	0	0	0	0	0
9d135b2365e1a0e1797ff08e54f85f6a	Aerococcus christensenii			AGGGTTTGATCATGGCTCAGGACGAACGCTGGCGGCGTGCCTAATACATGCAAGTCGAGCGAACAGAGAAAGTGCTTGCACTTTCAAAGTTAGCGGCGGACGGGTGAGTAACACGTAAGGAACCTACCGATAAGCGGGGGACAACATCCGGAAACGGGTGCTAATACCGCATAGGAAGTTTGTTCACATGAACAAACTTAGAAAGATGGCTCTGCTATCACTTATCGATGGCCTTGCGGTGCATTAACTAGTTGGCGAGGTAACGGCTCACCAAGGTGATGATGCATAGCCGACCTGAGAGGGTAATCGGCCACATTGGGACTGAGACACGGCCCAAACTCCTACGGGAGGCAGCA	D_0__Bacteria;D_1__Firmicutes;D_2__Bacilli;D_3__Lactobacillales;D_4__Aerococcaceae;D_5__Aerococcus;D_6__Aerococcus christensenii	0	0	0	0	0	0	0	0	0	0	0	0	0	0	0	0	0	0	0	0	0	0	0	0	0	0	0	0	0	0	0	0	0	0	0	0	0	0	0	0	0	0	0	0
072d3a0494e8f27975077fac8dfa60c9	Aerococcus urinae			AGGGTTTGATTATGGCTCAGGACGAACGCTGGCGGCGTGCCTAATACATGCAAGTCGAGCGAACCGACGAAGTGCTTGCACTTCTGACGTTAGCGGCGGACGGGTGAGTAACACGTAAGGAACCTACCGATAAGCGGGGGACAACATCCGGAAACGGGTGCTAATACCGCATAGGAAACACCACCTCATGGTGGTGTTTGGAAAGACGGCTTTGCTGTCACTTATCGATGGCCTTGCGGTGCATTAGCTCGTTGGTGGGGTAACGGCCTACCAAGGCAATGATGCATAGCCGACCTGAGAGGGTAATCGGCCACATTGGGACTGAGACACGGCCCAAACTCCTACGGGAGGCAGCA	D_0__Bacteria;D_1__Firmicutes;D_2__Bacilli;D_3__Lactobacillales;D_4__Aerococcaceae;D_5__Aerococcus;D_6__Aerococcus urinae ACS-120-V-Col10a	0	0	0	0	0	0	0	0	0	0	0	0	0	0	0	0	0	0	0	0	0	0	0	0	0	0	0	0	0	0	0	0	0	0	0	0	0	0	0	0	0	0	0.0318766	0
270ca12530a31ebe28c94f07efd4e8bc	Aerococcus urinae			AGAGTTTGATTATGGCTCAGGACGAACGCTGGCGGCGTGCCTAATACATGCAAGTCGAGCGAACCGACGAAGTGCTTGCACTTCTGACGTTAGCGGCGGACGGGTGAGTAACACGTAAGGAACCTACCGATAAGCGGGGGACAACATCCGGAAACGGGTGCTAATACCGCATAGGAAAGGTCACCACATGGTGGCTTTTGGAAAGACGGCTTTGCTGTCACTTATCGATGGCCTTGCGGTGCATTAGCTCGTTGGTGGGGTAACGGCCTACCAAGGCAATGATGCATAGCCGACCTGAGAGGGTAATCGGCCACATTGGGACTGAGACACGGCCCAAACTCCTACGGGAGGCAGCA	D_0__Bacteria;D_1__Firmicutes;D_2__Bacilli;D_3__Lactobacillales;D_4__Aerococcaceae;D_5__Aerococcus;D_6__Aerococcus urinae	0	0	0	0	0	0	0	0	0	0	0	0	0	0.0709304	0	0	0	0	0	0	0	0	0	0	0	0	0	0	0	0	0	0	0	0	0	0	0	0	0	0	0	0	0	0
aeb94afad96b1e323dd69b843de4e1c1	Aerococcus urinae			AGAGTTTGATTATGGCTCAGGACGAACGCTGGCGGCGTGCCTAATACATGCAAGTCGAGCGAACCGACGAAGTGCTTGCACTTCTGACGTTAGCGGCGGACGGGTGAGTAACACGTAAGGAACCTACCGATAAGCGGGGGACAACATCCGGAAACGGGTGCTAATACCGCATAGGAAAGGTCACCGCATGGTGACCTTTGGAAAGACGGCTTTGCTGTCACTTATCGATGGCCTTGCGGTGCATTAGCTCGTTGGTGGGGTAACGGCCTACCAAGGCAATGATGCATAGCCGACCTGAGAGGGTAATCGGCCACATTGGGACTGAGACACGGCCCAAACTCCTACGGGAGGCAGCA	D_0__Bacteria;D_1__Firmicutes;D_2__Bacilli;D_3__Lactobacillales;D_4__Aerococcaceae;D_5__Aerococcus;D_6__Aerococcus urinae	0	0	0	0	0	0	0	0	0	0	0	0	0	0	0	0	0	0	0	0	0	0	0	0	0	0	0	0	0	0	0	0	0	0	0	0	0	0	0	0	0	0	0.0860667	0
38911dbe4539442db74cd756970b4337	Atopobium deltae			AGGGTTTGATTATGGCTCAGGATGAACGCTGGCGGCGCGCCTAACACATGCAAGTCGAACGATTAAAGCACCTTCGGGTGTGTATAAAGTGGCGAACGGCTGAGTAACACGTGGGCAACCTGCCTTTTACTTTGGGATAGCCTCGGGAAACCGAGGATAATACCGAATACTTTGTATGTATCGCATGGTATATACAAGAAAGCTTTTGCGGTAAAAGATGGGCCCGCGGCCTGTTAGCTTGTTGGTGAGGTAACGGCTCACCAAGGCAATGATGGGTAGCCGGGTTGAGAGACCGACCGGCCAGATTGGGACTGAGACACGGCCCAGACTCCTACGGGAGGCAGCA	D_0__Bacteria;D_1__Actinobacteria;D_2__Coriobacteriia;D_3__Coriobacteriales;D_4__Atopobiaceae;D_5__Atopobium;D_6__Atopobium deltae	0	0	0	0	0	0.0524974	0	0	0	0	0.3544	0	0	0	0	0	0	0	0	0	0.315247	0	0	0.326584	0	0.19245	0	0	0	0.346956	0	0	0	0	0	0.253658	0	0	0	0	0	0	0.0828791	0
4cea0a175d82234384fc9e0e39a3555f	Atopobium deltae			AGGGTTTGATCATGGCTCAGGATGAACGCTGGCGGCGCGCCTAACACATGCAAGTCGAACGATTAAAGCACCTTCGGGTGTGTATAAAGTGGCGAACGGCTGAGTAACACGTGGGCAACCTGCCTTTTACTTTGGGATAGCCTCGGGAAACCGAGGATAATACCGAATACTTTGTATGTATCGCATGGTATATACAAGAAAGCTTTTGCGGTAAAAGATGGGCCCGCGGCCTGTTAGCTTGTTGGTGAGGTAACGGCTCACCAAGGCAATGATGGGTAGCCGGGTTGAGAGACCGACCGGCCAGATTGGGACTGAGACACGGCCCAGACTCCTACGGGAGGCAGCA	D_0__Bacteria;D_1__Actinobacteria;D_2__Coriobacteriia;D_3__Coriobacteriales;D_4__Atopobiaceae;D_5__Atopobium;D_6__Atopobium deltae	0	0.186404	0	0	0	0	0	0	0	0	0	0.0966534	0	0	0.090799	0	0	0	0	0	0.193998	0	0	0	0	0.177646	0	0	0	0	0	0	0	0.140617	0.0605113	0	0	0.119413	0	0	0	0	0	0
68bcca815cc528fd215c7833bd186c03	Atopobium deltae			AGAGTTTGATTATGGCTCAGGATGAACGCTGGCGGCGCGCCTAACACATGCAAGTCGAACGATTAAAGCACCTTCGGGTGTGTATAAAGTGGCGAACGGCTGAGTAACACGTGGGCAACCTGCCTTTTACTTTGGGATAGCCTCGGGAAACCGAGGATAATACCGAATACTTTGTATGTATCGCATGGTATATACAAGAAAGCTTTTGCGGTAAAAGATGGGCCCGCGGCCTGTTAGCTTGTTGGTGAGGTAACGGCTCACCAAGGCAATGATGGGTAGCCGGGTTGAGAGACCGACCGGCCAGATTGGGACTGAGACACGGCCCAGACTCCTACGGGAGGCAGCA	D_0__Bacteria;D_1__Actinobacteria;D_2__Coriobacteriia;D_3__Coriobacteriales;D_4__Atopobiaceae;D_5__Atopobium;D_6__Atopobium deltae	0	0.367325	0	0	0	0	0	0	0	0	0.200827	0.296001	0	0	0.302663	0	0	0	0	0	0.218248	0	0	0	0	0	0	0	0	0	0	0	0	0.393728	0	0	0	0	0	0	0	0	0.0828791	0
d5ffad2b035acd931e80fc3d22f59b95	Atopobium deltae			AGAGTTTGATCATGGCTCAGGATGAACGCTGGCGGCGCGCCTAACACATGCAAGTCGAACGATTAAAGCACCTTCGGGTGTGTATAAAGTGGCGAACGGCTGAGTAACACGTGGGCAACCTGCCTTTTACTTTGGGATAGCCTCGGGAAACCGAGGATAATACCGAATACTTTGTATGTATCGCATGGTATATACAAGAAAGCTTTTGCGGTAAAAGATGGGCCCGCGGCCTGTTAGCTTGTTGGTGAGGTAACGGCTCACCAAGGCAATGATGGGTAGCCGGGTTGAGAGACCGACCGGCCAGATTGGGACTGAGACACGGCCCAGACTCCTACGGGAGGCAGCA	D_0__Bacteria;D_1__Actinobacteria;D_2__Coriobacteriia;D_3__Coriobacteriales;D_4__Atopobiaceae;D_5__Atopobium;D_6__Atopobium deltae	0	0	0	0	0	0	0	0.0204061	0	0	0.200827	0	0	0	0	0	0.154242	0	0	0.0467836	0.175811	0	0.0592513	0	0	0.113496	0	0	0	0.112251	0	0	0	0	0	0	0	0	0	0	0	0	0.184884	0
0e4eea630232eedeb33eeb96f4ae0674	Atopobium minutum			AGGGTTTGATCATGGCTCAGGATGAACGCTGGCGGCGCGCCTAACACATGCAAGTCGAACGATTAAAGCATCTTTTAGATGTGTATAAAGTGGCGAACGGCTGAGTAACACGTGGGCAACCTGCCCTTTTCTTTGGGATAGCTACGGGAAACCGTGGGTAATACCGAATATTTCTTGAGTGTCGCATGGCACACAAGACAAAGCGTCTAGCGGAAAAGGATGGGCCCGCGGCCTGTTAGCTTGTTGGTGGGGTAATGGCCTACCAAGGCAGTTATGGGTAGCCGGGTTGAGAGACCGACCGGCCAGATTGGGACTGAGACACGGCCCAGACTCCTACGGGAGGCAGCA	D_0__Bacteria;D_1__Actinobacteria;D_2__Coriobacteriia;D_3__Coriobacteriales;D_4__Atopobiaceae;D_5__Atopobium;D_6__Atopobium minutum	0	0	0	0	0	0	0	0	0	0	0	0	0	0	0	0	0	0	0	0	0	0	0	0	0	0	0	0	0	0	0	0	0	0	0	0	0	0	0	0	0	0	0	0
46037bc05f367cef611d00bf01953b51	Atopobium minutum			AGGGTTTGATTATGGCTCAGGATGAACGCTGGCGGCGCGCCTAACACATGCAAGTCGAACGATTAAAGCATCTTTTAGATGTGTATAAAGTGGCGAACGGCTGAGTAACACGTGGGCAACCTGCCCTTTTCTTTGGGATAGCTACGGGAAACCGTGGGTAATACCGAATATTTCTTGAGTGTCGCATGGCACACAAGACAAAGCGTCTAGCGGAAAAGGATGGGCCCGCGGCCTGTTAGCTTGTTGGTGGGGTAATGGCCTACCAAGGCAGTTATGGGTAGCCGGGTTGAGAGACCGACCGGCCAGATTGGGACTGAGACACGGCCCAGACTCCTACGGGAGGCAGCA	D_0__Bacteria;D_1__Actinobacteria;D_2__Coriobacteriia;D_3__Coriobacteriales;D_4__Atopobiaceae;D_5__Atopobium;D_6__Atopobium minutum	0	0	0	0	0	0	0	0	0	0	0	0	0	0	0	0	0	0	0	0	0	0.0952623	0	0	0	0	0	0	0	0	0	0	0	0	0	0	0	0	0	0	0	0	0.0318766	0
83a269d77264e3ff58d227da36644460	Atopobium minutum			AGAGTTTGATTATGGCTCAGGATGAACGCTGGCGGCGCGCCTAACACATGCAAGTCGAACGATTAAAGCATCTTTTAGATGTGTATAAAGTGGCGAACGGCTGAGTAACACGTGGGCAACCTGCCCTTTTCTTTGGGATAGCTACGGGAAACCGTGGGTAATACCGAATATTTCTTGAGTGTCGCATGGCACACAAGACAAAGCGTCTAGCGGAAAAGGATGGGCCCGCGGCCTGTTAGCTTGTTGGTGGGGTAATGGCCTACCAAGGCAGTTATGGGTAGCCGGGTTGAGAGACCGACCGGCCAGATTGGGACTGAGACACGGCCCAGACTCCTACGGGAGGCAGCA	D_0__Bacteria;D_1__Actinobacteria;D_2__Coriobacteriia;D_3__Coriobacteriales;D_4__Atopobiaceae;D_5__Atopobium;D_6__Atopobium minutum	0	0	0	0	0	0	0	0	0	0	0.490254	0	0	0	0	0	0	0	0	0	0	0	0	0	0.148157	0	0	0	0	0	0	0	0	0	0	0	0	0	0	0	0	0	0	0
9bbd82468f1afaf8432c3f124efdf0ac	Atopobium minutum			AGGGTTTGATCCTGGCTCAGGATGAACGCTGGCGGCGCGCCTAACACATGCAAGTCGAACGATTAAAGCATCTTTTAGATGTGTATAAAGTGGCGAACGGCTGAGTAACACGTGGGCAACCTGCCCTTTTCTTTGGGATAGCTACGGGAAACCGTGGGTAATACCGAATATTTCTTGAGTGTCGCATGGCACACAAGACAAAGCGTCTAGCGGAAAAGGATGGGCCCGCGGCCTGTTAGCTTGTTGGTGGGGTAATGGCCTACCAAGGCAGTTATGGGTAGCCGGGTTGAGAGACCGACCGGCCAGATTGGGACTGAGACACGGCCCAGACTCCTACGGGAGGCAGCA	D_0__Bacteria;D_1__Actinobacteria;D_2__Coriobacteriia;D_3__Coriobacteriales;D_4__Atopobiaceae;D_5__Atopobium;D_6__Atopobium minutum	0	0	0	0	0	0	0	0	0	0	0	0	0	0	0	0	0	0	0	0	0	0	0	0	0	0	0	0	0	0	0	0	0	0	0.0857244	0	0	0	0	0	0	0	0	0
44c462d4e2ac36362aea49a7705f38a2	Atopobium parvulum	100	98.8439	AGGGTTTGATTATGGCTCAGGATGAACGCTGGCGGCGCGCCTAACACATGCAAGTCGAACGATTAAAGCACCTTCGGGTGTGTATAAAGTGGCGAACGGCTGAGTAACACGTGGGCAACCTGCCCCTCTCATTGGGATAGCCACGGGAAACCGTGGATAATACCGAATACTTCGGGACTTCCGCATGGAAGACTCGAGAAAGCTCCGGCGGAGAGGGATGGGCCCGCGGCCTGTTAGCTTGTTGGTGGGGTAACGGCCTACCAAGGCAATGATGGGTAGCTGGGTTGAGAGACCGACCAGCCAGATTGGGACTGAGACACGGCCCAGACTCCTACGGGAGGCAGCA	D_0__Bacteria;D_1__Actinobacteria;D_2__Coriobacteriia;D_3__Coriobacteriales;D_4__Atopobiaceae;D_5__Atopobium	0	0	0	0	0	0	0	0	0	0	0	0	0	0	0	0	0	0	0	0	0	0	0	0	0	0	0	0	0	0	0	0	0	0	0	0	0	0	0	0	0	0	0	0
4ef2ff69181ff10af6048ece65147077	Atopobium parvulum	100	99.422	AGAGTTTGATTATGGCTCAGGATGAACGCTGGCGGCGCGCCTAACACATGCAAGTCGAACGATTAAAGCACCTTCGGGTGTGTATAAAGTGGCGAACGGCTGAGTAACACGTGGGCAACCTGCCCCTCTCATTGGGATAGCCACGGGAAACCGTGGATAATACCGAATACTTCGAGACTTCCGCATGGAAGACTCGAGAAAGCTCCGGCGGAGAGGGATGGGCCCGCGGCCTGTTAGCTTGTTGGTGGGGTAACGGCCTACCAAGGCAATGATGGGTAGCTGGGTTGAGAGACCGACCAGCCAGATTGGGACTGAGACACGGCCCAGACTCCTACGGGAGGCAGCA	D_0__Bacteria;D_1__Actinobacteria;D_2__Coriobacteriia;D_3__Coriobacteriales;D_4__Atopobiaceae;D_5__Atopobium	0	0	0	0	0	0	0	0	0	0	0	0	0	0	0	0	0	0	0	0	0	0	0	0	0	0	0.107089	0	0	0	0	0	0	0	0	0	0	0	0	0	0	0	0	0
539096dbd5070afdbf35103113c2036b	Atopobium parvulum	100	99.1329	AGGGTTTGATTATGGCTCAGGATGAACGCTGGCGGCGCGCCTAACACATGCAAGTCGAACGATTAAAGCACCTTCGGGTGTGTATAAAGTGGCGAACGGCTGAGTAACACGTGGGCAACCTGCCCCTCTCATTGGGATAGCCACGGGAAACCGTGGATAATACCGAATACTTCGAGACTTCCGCATGGAAGACTCGAGAAAGCTCCGGCGGAGAGGGATGGGCCCGCGGCCTGTTAGCTTGTTGGTGGGGTAACGGCCTACCAAGGCAATGATGGGTAGCTGGGTTGAGAGACCGACCAGCCAGATTGGGACTGAGACACGGCCCAGACTCCTACGGGAGGCAGCA	D_0__Bacteria;D_1__Actinobacteria;D_2__Coriobacteriia;D_3__Coriobacteriales;D_4__Atopobiaceae;D_5__Atopobium	0	0	0	0	0	0	0	0	0	0	0	0	0	0	0	0	0	0	0	0	0	0	0	0	0	0	0	0	0	0	0	0	0	0	0	0	0	0	0.126304	0	0	0	0	0
8210238d9cbc3fda05e713c65a00e6ef	Atopobium parvulum	100	98.8439	AGGGTTTGATTATGGCTCAGGATGAACGCTGGCGGCGCGCCTAACACATGCAAGTCGAACGATTAAAGCACCTTCGGGTGTGTATAAAGTGGCGAACGGCTGAGTAACACGTGGGCAACCTGCCCCTCTCATTGGGATAGCCACGGGAAACCGTGGATAATACCGAATACTTCGAGACTTCCGCATGGAAGACTTGAGAAAGCTCCGGCGGAGAGGGATGGGCCCGCGGCCTGTTAGCTTGTTGGTGGGGTAACGGCCTACCAAGGCAATGATGGGTAGCTGGGTTGAGAGACCGACCAGCCAGATTGGGACTGAGACACGGCCCAGACTCCTACGGGAGGCAGCA	D_0__Bacteria;D_1__Actinobacteria;D_2__Coriobacteriia;D_3__Coriobacteriales;D_4__Atopobiaceae;D_5__Atopobium	0	0	0	0	0	0.292485	0	0	0	0	0	0	0	0	0	0	0	0	0	0	0	0	0	0	0	0	0	0	0	0	0	0	0	0	0	0	0	0	0	0	0	0	0	0
6d2e8e32342ce12e306039f739ae90d1	Atopobium rimae	100	98.5591	AGGGTTTGATTATGGCTCAGGATGAACGCTGGCGGCGCGCCTAACACATGCAAGTCGAACGGTTAAAGCACCTTTTAGGTGTGTATAAAGTGGCGAACGGCTGAGTAACACGTGGGCAACCTGCCCTCCTCTTGGGGATAGCCTCGGGAAACCGAGGATAATACCCGATACTTCAATGTAGCCGCATGACTACATTGAGAAAGCTTTTGCGGAGAAGGATGGGCCCGCGGCCTGTTAGCTTGTTGGTGGGGTAGAGGCCTACCAAGGCAATGATGGGTAGCTGGGTTGAGAGACCGACCAGCCAGATTGGGACTGAGACACGGCCCAGACTCCTACGGGAGGCAGCA	D_0__Bacteria;D_1__Actinobacteria;D_2__Coriobacteriia;D_3__Coriobacteriales;D_4__Atopobiaceae;D_5__Atopobium;D_6__Atopobium sp. oral taxon 199 str. F0494	0	0	0	0	0	0	0	0	0	0	0	0	0	0	0	0	0	0	0	0	0	0	0	0	0	0	0	0	0	0	0	0.0433338	0	0	0	0	0	0	0	0	0	0	0	0
70a223d3b9167df9e4c9bd93abc6e065	Atopobium rimae	100	99.1354	AGGGTTTGATCATGGCTCAGGATGAACGCTGGCGGCGCGCCTAACACATGCAAGTCGAACGGTTAAAGCACCTTTTAGGTGTGTATAAAGTGGCGAACGGCTGAGTAACACGTGGGCAACCTACCCTCCTCTTGGGGATAGCCTCGGGAAACCGAGGATAATACCCGATACTTCAATGTGGCCGCATGACGACATTGAGAAAGCTTTTGCGGAGAAGGATGGGCCCGCGGCCTGTTAGCTTGTTGGTGGGGTAGAGGCCTACCAAGGCAATGATGGGTAGCTGGGTTGAGAGACCGACCAGCCAGATTGGGACTGAGACACGGCCCAGACTCCTACGGGAGGCAGCA	D_0__Bacteria;D_1__Actinobacteria;D_2__Coriobacteriia;D_3__Coriobacteriales;D_4__Atopobiaceae;D_5__Atopobium	0	0	0	0	0	0	0.208663	0	0	0	0	0	0	0	0	0	0	0	0	0	0	0	0	0	0	0	0	0	0	0	0	0	0	0	0	0	0	0	0	0	0	0	0	0
b1db5bed0b61a663d63c514495582480	Atopobium rimae	100	99.4236	AGAGTTTGATTATGGCTCAGGATGAACGCTGGCGGCGCGCCTAACACATGCAAGTCGAACGGTTAAAGCACCTTTTAGGTGTGTATAAAGTGGCGAACGGCTGAGTAACACGTGGGCAACCTGCCCTCCTCTTGGGGATAGCCTCGGGAAACCGAGGATAATACCCGATACTTCAATGTGGCCGCATGACGACATTGAGAAAGCTTTTGCGGAGAAGGATGGGCCCGCGGCCTGTTAGCTTGTTGGTGGGGTAGAGGCCTACCAAGGCAATGATGGGTAGCTGGGTTGAGAGACCGACCAGCCAGATTGGGACTGAGACACGGCCCAGACTCCTACGGGAGGCAGCA	D_0__Bacteria;D_1__Actinobacteria;D_2__Coriobacteriia;D_3__Coriobacteriales;D_4__Atopobiaceae;D_5__Atopobium	0	0	0	0	0	0	0	0	0	0	0	0	0	0	0	0	0	0	0	0	0	0	0.0700242	0	0	0	0	0	0	0	0	0	0	0	0	0	0	0	0	0	0	0	0	0
02943307f2f9f0e5c6184b0935954f7b	Atopobium sp.	100	98.8439	AGGGTTTGATTATGGCTCAGGATGAACGCTGGCGGCGCGCCTAACACATGCAAGTCGAACGATTAAAGCACCTTCGGGTGTGTATAAAGTGGCGAACGGCTGAGTAACACGTGGGCAACCTGCCCTTTGCACTGGGATAGCCTCGGGAAACCGAGGTTAATACCGGATACTCCATATATATCGCATGATGTATATGGGAAAGCTCCGACGGCAAAGGATGGGCCCGCGGCCTGTTAGCTAGTTGGTGGGGTAACGGCCTACCAAGGCAATGATGGGTAGCCGGGTTGAGAGACCGACCGGCCAGATTGGGACTGAGACACGGCCCAGACTCCTACGGGAGGCAGCA	D_0__Bacteria;D_1__Actinobacteria;D_2__Coriobacteriia;D_3__Coriobacteriales;D_4__Atopobiaceae;D_5__Atopobium;D_6__unidentified	0	0	0	0	0	0	0	0	0	0	0	0	0	0	0	0	0	0.143773	0	0	0	0	0	0	0	0	0	0	0	0	0	0	0	0	0	0	0	0	0	0	0	0	0	0
7e313f47ba9df087af715fe8b5c34a7e	Atopobium sp.	100	97.9827	AGGGTTTGATTATGGCTCAGGATGAACGCTGGCGGCGCGCCTAACACATGCAAGTCGAACGATTAAAGCACCTTTACGGTGTGTATAAAGTGGCGAACGGCTGAGTAACACGTGGGCAACCTGCCCTTTGCACTGGGATAGCCTCGGGAAACCGAGGTTAATACCGGATACTCCATATATATCGCATGATGTATATGGGAAAGCTCCGACGGCAAAGGATGGGCCCGCGGCCTGTTAGCTAGTTGGTGGGGTAACGGCCTACCAAGGCAATGATGGGTAGCCGGGTTGAGAGACCGACCGGCCAGATTGGGACTGAGACACGGCCCAGACTCCTACGGGAGGCAGCA	D_0__Bacteria;D_1__Actinobacteria;D_2__Coriobacteriia;D_3__Coriobacteriales;D_4__Atopobiaceae;D_5__Atopobium;D_6__unidentified	0	0	0	0	0	0	0	0	0	0	0	0	0	0	0	0	0	0	0	0	0	0	0	0	0	0	0	0	0	0	0	0	0	0	0	0	0	0	0	0	0	0	0.207198	0
dd202cce9cdde7c86d80141373faf00b	Atopobium sp.	100	99.711	AGAGTTTGATCATGGCTCAGGATGAACGCTGGCGGCGCGCCTAACACATGCAAGTCGAACGATTAAAGCACCTTCGGGTGTGTATAAAGTGGCGAACGGCTGAGTAACACGTGGGCAACCTGCCCCTCTCATTGGGATAGCCACGGGAAACCGTGGATAATACCGAATACTTCGAGTCTCCCGCATGGAAGACTCGAGAAAGCTCCGGCGGAGAGGGATGGGCCCGCGGCCTGTTAGCTTGTTGGTGGGGTAACGGCCTACCAAGGCAATGATGGGTAGCTGGGTTGAGAGACCGACCAGCCAGATTGGGACTGAGACACGGCCCAGACTCCTACGGGAGGCAGCA	D_0__Bacteria;D_1__Actinobacteria;D_2__Coriobacteriia;D_3__Coriobacteriales;D_4__Atopobiaceae;D_5__Atopobium;D_6__uncultured bacterium	0	0	0	0	0	0	0	0	0	0	0	0	0	0	0	0	0	0	0	0	0	0	0	0	0	0	0	0	0	0	0	0	0	0	0	0	0	0	0	0	0	0	0	0
31bce627cdde4cabc0068bd183d7774f	Atopobium vaginae			AGGGTTTGATCATGGCTCAGGATGAACGCTGGCGGCGCGCCTAACACATGCAAGTCGAACGGTTAAAGCATCTTCGGATGTGTATAAAGTGGCGAACGGCTGAGTAACACGTGGGCAACCTGCCCTTTGCACTGGGATAGCCTCGGGAAACCGAGGTTAATACCGGATACTCCATATTTGTCGCATGGCGAATATGGGAAAGCTCCGGCGGCAAAGGATGGGCCCGCGGCCTGTTAGCTAGTTGGTGGGGTAGTGGCCTACCAAGGCAATGATGGGTAGCCGGGTTGAGAGACCGACCGGCCAGATTGGGACTGAGACACGGCCCAGACTCCTACGGGAGGCAGCA	D_0__Bacteria;D_1__Actinobacteria;D_2__Coriobacteriia;D_3__Coriobacteriales;D_4__Atopobiaceae;D_5__Atopobium;D_6__Atopobium vaginae	0.140865	0	0	0	0	0	0	0	0	0	0	0	0.805322	0	2.51211	0.397639	0	1.0154	0	0	0	0	0	0	0	0	0.25166	0	0	1.48987	0	0	0	0.386698	0	0.289894	0	0.471196	0	0	0	0	0.121131	0.107009
3216f6662fae7502b0cef176afafae29	Atopobium vaginae			AGGGTTTGATTATGGCTCAGGATGAACGCTGGCGGCGCGCCTAACACATGCAAGTCGAACGGTTAAAGCATCTTCGGATGTGTATAAAGTGGCGAACGGCTGAGTAACACGTGGGCAACCTGCCCTTTGCACTGGGATAGCCTCGGGAAACCGAGGTTAATACCGGATACTCCATATTTGTCGCATGGCGAATATGGGAAAGCTCCGGCGGCAAAGGATGGGCCCGCGGCCTGTTAGCTAGTTGGTGGGGTAGTGGCCTACCAAGGCAATGATGGGTAGCCGGGTTGAGAGACCGACCGGCCAGATTGGGACTGAGACACGGCCCAGACTCCTACGGGAGGCAGCA	D_0__Bacteria;D_1__Actinobacteria;D_2__Coriobacteriia;D_3__Coriobacteriales;D_4__Atopobiaceae;D_5__Atopobium;D_6__Atopobium vaginae	0	0	0	0	0	0	0	0	0	0	0.383934	0	0.959384	0.106396	4.17676	0.509475	0.222793	1.42874	0	0	0	0	0	0	0	0	0.342686	0	0	2.27563	0	0	0	0.492161	0	0.462019	0	0.758431	0	0	0	0	0.223136	0
4b907e44e8d238dbe493df988765394d	Atopobium vaginae			AGGGTTTGATCCTGGCTCAGGATGAACGCTGGCGGCGCGCCTAACACATGCAAGTCGAACGGTTAAAGCATCTTCGGATGTGTATAAAGTGGCGAACGGCTGAGTAACACGTGGGCAACCTGCCCTTTGCACTGGGATAGCCTCGGGAAACCGAGGTTAATACCGGATACTCCATATTTGTCGCATGGCGAATATGGGAAAGCTCCGGCGGCAAAGGATGGGCCCGCGGCCTGTTAGCTAGTTGGTGGGGTAGTGGCCTACCAAGGCAATGATGGGTAGCCGGGTTGAGAGACCGACCGGCCAGATTGGGACTGAGACACGGCCCAGACTCCTACGGGAGGCAGCA	D_0__Bacteria;D_1__Actinobacteria;D_2__Coriobacteriia;D_3__Coriobacteriales;D_4__Atopobiaceae;D_5__Atopobium;D_6__Atopobium vaginae	0	0	0	0	0	0	0	0	0	0	0	0	0.280112	0	0.408596	0	0	0.329479	0	0	0	0	0	0	0	0	0	0	0	0.688811	0	0	0	0	0	0	0	0.103276	0	0	0	0	0	0
57ba6bdf01d171e20bc37bea710cba21	Atopobium vaginae			AGAGTTTGATTATGGCTCAGGATGAACGCTGGCGGCGCGCCTAACACATGCAAGTCGAACGGTTAAAGCATCTTCGGATGTGTATAAAGTGGCGAACGGCTGAGTAACACGTGGGCAACCTGCCCTTTGCACTGGGATAGCCTCGGGAAACCGAGGTTAATACCGGATACTCCATATTTGTCGCATGGCGAATATGGGAAAGCTCCGGCGGCAAAGGATGGGCCCGCGGCCTGTTAGCTAGTTGGTGGGGTAGTGGCCTACCAAGGCAATGATGGGTAGCCGGGTTGAGAGACCGACCGGCCAGATTGGGACTGAGACACGGCCCAGACTCCTACGGGAGGCAGCA	D_0__Bacteria;D_1__Actinobacteria;D_2__Coriobacteriia;D_3__Coriobacteriales;D_4__Atopobiaceae;D_5__Atopobium;D_6__Atopobium vaginae	0.359206	0	0.204575	0	0	0	0	0	0	0	0.236267	0	0.57423	0	3.71772	0.428705	0	1.31492	0	0	0	0	0	0	0	0	0.305205	0	0	1.60722	0	0	0	0.386698	0	0.285365	0	0.668065	0	0	0	0	0.156195	0
caadfb19b8590bb36d0bdf35cdde6fab	Atopobium vaginae			AGGGTTTGATTATGGCTCAGGATGAACGCTGGCGGCGCGCCTAACACATGCAAGTCGAACGGTTAAAGCATCTTCGGATGTGTATAAAGTGGCGAACGGCTGAGTAACACGTGGGCAACCTGCCCTTTGCACTGGGATAGCCTCGGGAAACCGAGGTTAATACCGGATACTCCATATCCATCGCATGATAGATATGGGAAAGCTCCGGCGGCAAAGGATGGGCCCGCGGCCTGTTAGCTAGTTGGTGGGGTAGTGGCCTACCAAGGCAATGATGGGTAGCCGGGTTGAGAGACCGACCGGCCAGATTGGGACTGAGACACGGCCCAGACTCCTACGGGAGGCAGCA	D_0__Bacteria;D_1__Actinobacteria;D_2__Coriobacteriia;D_3__Coriobacteriales;D_4__Atopobiaceae;D_5__Atopobium;D_6__Atopobium vaginae	0.0704325	0	0	0	0	0	0	0	0	0	0	0	0	0	0	0	0	0	0	0	0	0	0	0	0	0	0	0	0	0	0	0	0	0.449975	0	0	0	0	0	0	0	0	0.153008	0
77b5b5c79e129c16b2c23bbe30a757c6	Gardnerella leopoldii	100	99.4236	AGGGTTTGATTATGGCTCAGGATGAACGCTGGCGGCGTGCTTAACACATGCAAGTCGAACGGGATCTAGTCAGCTTGCTGACTGGTGAGAGTGGCGAACGGGTGAGTAATGCGTGACCAACCTGCCCCATGCTCCAGAATAGCTCTTGGAAACGGGTGGTAATGCTGGATGCTCCAACTTGACGCATGTCTTGTTGGGAAAGTGTTTAGTGGCATGGGATGGGGTCGCGTCCTATCAGCTTGTAGGCGGGGTAATGGCCCACCTAGGCTTCGACGGGTAGCCGGCCTGAGAGGGCGGACGGCCACATTGGGACTGAGATACGGCCCAGACTCCTACGGGAGGCAGCA	D_0__Bacteria;D_1__Actinobacteria;D_2__Actinobacteria;D_3__Bifidobacteriales;D_4__Bifidobacteriaceae;D_5__Gardnerella;D_6__uncultured bacterium	0	0	0	0	0	0	0	0	0	0	0	0	3.41036	0	0	0	0.199943	11.7085	0	0	0	0	0	0	0	0	0	0	0	0.37757	0	0	0	0	0	1.96132	0	0	0	0	0	0	1.59383	0
36b83abbcb54828ccfcd17c4a7c9e628	Gardnerella vaginalis	100	99.7118	AGGGTTTGATCCTGGCTCAGGATGAACGCTGGCGGCGTGCTTAACACATGCAAGTCGAACGGGATCTAGTCAGCTTGCTGACTGGTGAGAGTGGCGAACGGGTGAGTAATGCGTGACCAACCTGCCCCATGCTCCAGAATAGCTCTTGGAAACGGGTGGTAATGCTGGATGCTCCAACTTGACGCATGTCTTGTTGGGAAAGTGTTTAGTGGCATGGGATGGGGTCGCGTCCTATCAGCTTGTAGGCGGGGTAATGGCCCACCTAGGCTTCGACGGGTAGCCGGCCTGAGAGGGCGGACGGCCACATTGGGACTGAGATACGGCCCAGACTCCTACGGGAGGCAGCA	D_0__Bacteria;D_1__Actinobacteria;D_2__Actinobacteria;D_3__Bifidobacteriales;D_4__Bifidobacteriaceae;D_5__Gardnerella;D_6__uncultured bacterium	0	0	0	0	0	0	0	0	0	0	0	0	0.889356	0	0	0	0	2.0877	0	0	0	0	0	0	0	0	0	0	0	0	0	0	0	0	0	0.303483	0	0	0	0	0	0	0.277326	0
40dde65d78713b2e9bfc30a8f372f0b4	Gardnerella vaginalis	100	99.4236	AGGGTTTGATCATGGCTCAGGATGAACGCTGGCGGCGTGCTTAACACATGCAAGTCGAACGGGATCTAGTCAGCTTGCTGACTGGTGAGAGTGGCGAACGGGTGAGTAATGCGTGACCAACCTGCCCCATGCTCCAGAATAGCTCTTGGAAACGGGTGGTAATGCTGGATGCTCCAACTTGACGCATGTCTTGTTGGGAAAGTGTTTAGTGGCATGGGATGGGGTCGCGTCCTATCAGCTTGTAGGCGGGGTAATGGCCCACCTAGGCTTCGACGGGTAGCCGGCCTGAGAGGGCGGACGGCCACATTGGGACTGAGATACGGCCCAGACTCCTACGGGAGGCAGCA	D_0__Bacteria;D_1__Actinobacteria;D_2__Actinobacteria;D_3__Bifidobacteriales;D_4__Bifidobacteriaceae;D_5__Gardnerella;D_6__uncultured bacterium	0	0	0	0	0	0	0	0	0	0	0	0	2.87115	0	0	0	0	8.00036	0	0	0	0	0	0	0	0	0	0	0	0.423491	0	0	0	0	0	1.25017	0	0	0	0	0	0	1.09018	0
46e5211930f2105605d6530288aa0495	Gardnerella vaginalis	100	99.1354	AGAGTTTGATTATGGCTCAGGATGAACGCTGGCGGCGTGCTTAACACATGCAAGTCGAACGGGATCTGACCAGCTTGCTGGTTGGTGAGAGTGGCGAACGGGTGAGTAATGCGTGACCAACCTGCCCCATGCTCCAGAATAGCTCTTGGAAACGGGTGGTAATGCTGGATGCTCCAACTTGACGCATGTCTTGTTGGGAAAGTGTTTAGTGGCATGGGATGGGGTCGCGTCCTATCAGCTTGTAGGCGGGGTAATGGTCCACCTAGGCTTCGACGGGTAGCCGGCCTGAGAGGGCGGACGGCCACATTGGGACTGAGATACGGCCCAGACTCCTACGGGAGGCAGCA	D_0__Bacteria;D_1__Actinobacteria;D_2__Actinobacteria;D_3__Bifidobacteriales;D_4__Bifidobacteriaceae;D_5__Gardnerella;D_6__uncultured bacterium	0	0	0	0	0	0	0	0	0	0	0	0	0	0	0	0	0	0	0	0	0	0	0	0	0	0	0	0	0	0	0	0	0	0	0	0	0	0	0	0.0430077	0	0	0	0
6027aabebde2885a6b4fae465c0ca258	Gardnerella vaginalis	100	99.4236	AGAGTTTGATTATGGCTCAGGATGAACGCTGGCGGCGTGCTTAACACATGCAAGTCGAACGGGATCTAGTCAGCTTGCTGACTGGTGAGAGTGGCGAACGGGTGAGTAATGCGTGACCAACCTGCCCCATGCTCCAGAATAGCTCTTGGAAACGGGTGGTAATGCTGGATGCTCCAACTTGACGCATGTCTTGTTGGGAAAGTGTTTAGTGGCATGGGATGGGGTCGCGTCCTATCAGCTTGTAGGCGGGGTAATGGCCCACCTAGGCTTCGACGGGTAGCCGGCCTGAGAGGGCGGACGGCCACATTGGGACTGAGATACGGCCCAGACTCCTACGGGAGGCAGCA	D_0__Bacteria;D_1__Actinobacteria;D_2__Actinobacteria;D_3__Bifidobacteriales;D_4__Bifidobacteriaceae;D_5__Gardnerella;D_6__uncultured bacterium	0	0	0	0	0	0	0	0	0	0	0	0	2.59104	0	0	0	0	9.24939	0	0	0	0	0	0	0	0	0	0	0	0.255115	0	0	0	0	0	1.56724	0	0	0	0	0	0	1.25594	0
6c5edafd1590e0baac222cd644e97665	Gardnerella vaginalis	100	99.4236	AGGGTTTGATTATGGCTCAGGATGAACGCTGGCGGCGTGCTTAACACATGCAAGTCGAACGGGATCTGACCAGCTTGCTGGTTGGTGAGAGTGGCGAACGGGTGAGTAATGCGTGACCAACCTGCCCCATGCTCCAGAATAGCTCTTGGAAACGGGTGGTAATGCTGGATGCTCCAACTTGACGCATGTCTTGTTGGGAAAGTGTTTAGTGGCATGGGATGGGGTCGCGTCCTATCAGCTTGTAGGCGGGGTAATGGCCCACCTAGGCTTCGACGGGTAGCCGGCCTGAGAGGGCGGACGGCCACATTGGGACTGAGATACGGCCCAGACTCCTACGGGAGGCAGCA	D_0__Bacteria;D_1__Actinobacteria;D_2__Actinobacteria;D_3__Bifidobacteriales;D_4__Bifidobacteriaceae;D_5__Gardnerella	0.274687	0.191886	0	0	0.481283	0	0	0	0	0	0	0	1.71569	0	0	0	0	4.19337	0	0	2.29767	0	0	0	0	0	0.449775	0	0	2.68891	0	0	0	11.5377	0.141193	0	0	3.75666	0	0	0	0.824122	0.360205	0
8531fc8141c6a8ae6204f8b38a964728	Gardnerella vaginalis	100	99.1354	AGGGTTTGATTATGGCTCAGGATGAACGCTGGCGGCGTGCTTAACACATGCAAGTCGAACGGGATCTGACCAGCTTGCTGGTTGGTGAGAGTGGCGAACGGGTGAGTAATGCGTGACCAACCTGCCCCATGCTCTAGAATAGCTCTTGGAAACGGGTGGTAATGCTGGATGCTCCAACTTGACGCATGTCTTGTTGGGAAAGTGTTTAGTGGCATGGGATGGGGTCGCGTCCTATCAGCTTGTAGGCGGGGTAATGGCCCACCTAGGCTTCGACGGGTAGCCGGCCTGAGAGGGCGGACGGCCACATTGGGACTGAGATACGGCCCAGACTCCTACGGGAGGCAGCA	D_0__Bacteria;D_1__Actinobacteria;D_2__Actinobacteria;D_3__Bifidobacteriales;D_4__Bifidobacteriaceae;D_5__Gardnerella	0	0	0	0	0	0	0	0	0	0	0	0	1.9888	0	0	0	0	0	0	0	0	0	0	0	0	0	0	0	0	0	0	0	0	0	0	0	0	0	0	0	0	0	0	0
87550d40135ceb9d8b81bbbb17c3d1fd	Gardnerella vaginalis	100	97.9827	AGGGTTTGATTATGGCTCAGGATGAACGCTGGCGGCGTGCTTAACACATGCAAGTCGAACGGGATCTGACCAGCTTGCTGGTTGGTGAGAGTGGCGAACGGGTGAGTAATGCGTGACCAACCTACCCTATGCTCCAGAATAGCTCCTGGAAACGGGTGGTAATGCTGGATGCTCCAACTTGACGCATGTTTTGTTGGGAAAGTGTTTAGCGGCATGGGATGGGGTCGCGTCCTATCAGCTTGTAGGCGGGGTAATGGCCCACCTAGGCTTCGACGGGTAGCCGGCCTGAGAGGGCGGACGGCCACATTGGGACTGAGATACGGCCCAGACTCCTACGGGAGGCAGCA	D_0__Bacteria;D_1__Actinobacteria;D_2__Actinobacteria;D_3__Bifidobacteriales;D_4__Bifidobacteriaceae;D_5__Gardnerella;D_6__Gardnerella vaginalis	0	0	0	0	0	0	0	0	0	0	0	0	0	0	0	0	0	0	0	0	0	0	0	0	0	0	0	0	0	0	0	0	0	0	0	0	0	0	0	0	0	0	0.726786	0
91804f79ea0061b7ed070cc0ff28e4f5	Gardnerella vaginalis	100	99.7118	AGGGTTTGATCCTGGCTCAGGATGAACGCTGGCGGCGTGCTTAACACATGCAAGTCGAACGGGATCTGACCAGCTTGCTGGTTGGTGAGAGTGGCGAACGGGTGAGTAATGCGTGACCAACCTGCCCCATGCTCCAGAATAGCTCTTGGAAACGGGTGGTAATGCTGGATGCTCCAACTTGACGCATGTCTTGTTGGGAAAGTGTTTAGTGGCATGGGATGGGGTCGCGTCCTATCAGCTTGTAGGCGGGGTAATGGCCCACCTAGGCTTCGACGGGTAGCCGGCCTGAGAGGGCGGACGGCCACATTGGGACTGAGATACGGCCCAGACTCCTACGGGAGGCAGCA	D_0__Bacteria;D_1__Actinobacteria;D_2__Actinobacteria;D_3__Bifidobacteriales;D_4__Bifidobacteriaceae;D_5__Gardnerella;D_6__uncultured bacterium	0	0	0	0	0	0	0	0	0	0	0	0	0.497199	0.0709304	0	0	0	0.826694	0	0	0.709306	0	0	0	0	0	0	0	0	0.882698	0	0	0.0418148	3.69824	0	0	0	0.503469	0	0	0	0.0863101	0.0733161	0
b5ad12c245788990552bc7871280c375	Gardnerella vaginalis	100	99.4236	AGAGTTTGATTATGGCTCAGGATGAACGCTGGCGGCGTGCTTAACACATGCAAGTCGAACGGGATCTGACCAGCTTGCTGGTTGGTGAGAGTGGCGAACGGGTGAGTAATGCGTGACCAACCTGCCCCATGCTCCAGAATAGCTCTTGGAAACGGGTGGTAATGCTGGATGCTCCAACTTGACGCATGTCTTGTTGGGAAAGTGTTTAGTGGCATGGGATGGGGTCGCGTCCTATCAGCTTGTAGGCGGGGTAATGGCCCACCTAGGCTTCGACGGGTAGCCGGCCTGAGAGGGCGGACGGCCACATTGGGACTGAGATACGGCCCAGACTCCTACGGGAGGCAGCA	D_0__Bacteria;D_1__Actinobacteria;D_2__Actinobacteria;D_3__Bifidobacteriales;D_4__Bifidobacteriaceae;D_5__Gardnerella;D_6__uncultured bacterium	0	0	0	0	0	0	0	0	0	0	0	0	1.05042	0	0	0	0	3.24687	0	0	1.97029	0	0	0	0	0	0.449775	0	0	2.01541	0	0	0	7.57224	0	0	0	2.93368	0	0	0	0.534566	0.325141	0
b971b74802c98a7257ee155e9da9158b	Gardnerella vaginalis	100	99.4236	AGGGTTTGATCATGGCTCAGGATGAACGCTGGCGGCGTGCTTAACACATGCAAGTCGAACGGGATCTGACCAGCTTGCTGGTTGGTGAGAGTGGCGAACGGGTGAGTAATGCGTGACCAACCTGCCCCATGCTCCAGAATAGCTCTTGGAAACGGGTGGTAATGCTGGATGCTCCAACTTGACGCATGTCTTGTTGGGAAAGTGTTTAGTGGCATGGGATGGGGTCGCGTCCTATCAGCTTGTAGGCGGGGTAATGGCCCACCTAGGCTTCGACGGGTAGCCGGCCTGAGAGGGCGGACGGCCACATTGGGACTGAGATACGGCCCAGACTCCTACGGGAGGCAGCA	D_0__Bacteria;D_1__Actinobacteria;D_2__Actinobacteria;D_3__Bifidobacteriales;D_4__Bifidobacteriaceae;D_5__Gardnerella	0	0.235746	0	0	0	0	0	0	0	0	0	0	1.04342	0	0	0	0	2.91739	0	0	1.67323	0	0	0	0	0	0.267723	0	0	1.94398	0	0	0	8.21205	0	0	0	2.46571	0	0	0	0.495587	0.286889	0
bb152d247358b9ef20eade4f6d64bc52	Gardnerella vaginalis	100	99.1354	AGAGTTTGATTATGGCTCAGGATGAACGCTGGCGGCGTGCTTAACACATGCAAGTCGAACGGGATCCGACCAGCTTGCTGGTTGGTGAGAGTGGCGAACGGGTGAGTAATGCGTGACCAACCTGCCCCATGCTCCAGAATAGCTCTTGGAAACGGGTGGTAATGCTGGATGCTCCAACTTGACGCATGTCTTGTTGGGAAAGTGTTTAGTGGCATGGGATGGGGTCGCGTCCTATCAGCTTGTAGGCGGGGTAATGGCCCACCTAGGCTTCGACGGGTAGCCGGCCTGAGAGGGCGGACGGCCACATTGGGACTGAGATACGGCCCAGACTCCTACGGGAGGCAGCA	D_0__Bacteria;D_1__Actinobacteria;D_2__Actinobacteria;D_3__Bifidobacteriales;D_4__Bifidobacteriaceae;D_5__Gardnerella;D_6__uncultured bacterium	0	0	0.0991879	0	0	0	0	0	0	0	0	0	0	0	0	0	0	0	0	0	0	0	0	0	0	0	0	0	0	0	0	0	0	0	0	0	0	0	0	0	0	0	0.251825	0
d146febd123b3bff72c0d26587e6c926	Gardnerella vaginalis	100	99.4236	AGGGTTTGATTATGGCTCAGGATGAACGCTGGCGGCGTGCTTAACACATGCAAGTCGAACGGGATCCGACCAGCTTGCTGGTTGGTGAGAGTGGCGAACGGGTGAGTAATGCGTGACCAACCTGCCCCATGCTCCAGAATAGCTCTTGGAAACGGGTGGTAATGCTGGATGCTCCAACTTGACGCATGTCTTGTTGGGAAAGTGTTTAGTGGCATGGGATGGGGTCGCGTCCTATCAGCTTGTAGGCGGGGTAATGGCCCACCTAGGCTTCGACGGGTAGCCGGCCTGAGAGGGCGGACGGCCACATTGGGACTGAGATACGGCCCAGACTCCTACGGGAGGCAGCA	D_0__Bacteria;D_1__Actinobacteria;D_2__Actinobacteria;D_3__Bifidobacteriales;D_4__Bifidobacteriaceae;D_5__Gardnerella	0	0	0	0	0	0	0	0	0	0	0	0	0	0	0	0	0	0	0	0	0	0	0	0	0	0	0	0	0	0	0	0	0	0	0	0	0	0	0	0	0	0	0.283702	0
3c37a75fcbc9c2fdc1bf441474a14f1e	Gemella asaccharolytica			AGGGTTTGATTATGGCTCAGGACGAACGCTGGCGGCGTGCCTAATACATGCAAGTCGAGCGGACTTTAAGAGTGCTTGCACACTTAAAGTTAGCGGCGAACGGGTGAGTAACACGTAAAGAACCTACCTTATAGACAGGGACAACTATTGGAAACGATAGCTAATACCTGATAAGAAAGAAACTCGCATGAGAGAAAATCGAAAGTCGGAGCAATCTGACACTATAAGATGGCTTTGCGGTGCATTAGCTAGTTGGTAGGGTAAAAGCCTACCAAGGCGACGATGCATAGCCGACCTGAGAGGGTGATCGGCCACATTGGGACTGAGACACGGCCCAGACTCCTACGGGAGGCAGCA	D_0__Bacteria;D_1__Firmicutes;D_2__Bacilli;D_3__Bacillales;D_4__Family XI;D_5__Gemella;D_6__Gemella asaccharolytica	0	0	0	0	0	0	0	0	0	0	0	0	0	0	0	0	0	0	0	0	0	0	0	0	0	0	0	0	0	0	0	0	0	0	0	0	0	0	0	0	0	0	0	0
42147989c372189d0175a664f6c8ec0a	Gemella asaccharolytica			AGGGTTTGATTATGGCTCAGGACGAACGCTGGCGGCGTGCCTAATACATGCAAGTCGAGCGAACTTTAAGAGTGCTTGCACACTTAAAGTTAGCGGCGAACGGGTGAGTAACACGTAAAGAACCTACCTTATAGACAGGGACAACTATTGGAAACGATAGCTAATACCTGATAAGAAAGAAACTCGCATGAGAGAAGTTCGAAAGTCGGAGCAATCTGACACTATAAGATGGCTTTGCGGTGCATTAGCTAGTTGGTAGGGTAAAAGCCTACCAAGGCGACGATGCATAGCCGACCTGAGAGGGTGATCGGCCACATTGGGACTGAGACACGGCCCAGACTCCTACGGGAGGCAGCA	D_0__Bacteria;D_1__Firmicutes;D_2__Bacilli;D_3__Bacillales;D_4__Family XI;D_5__Gemella;D_6__Gemella asaccharolytica	0.323989	0	0	0	0	0	0	0	0	0	0	0	0	0	0	0	0	0	0	0	0	0	0	0	0	0	0	0	0	0	0	0	0	0	0	0	0	0	0	0	0	0	0.210385	0
59dff464ab33e82bbdbf9c08d2dc2014	Gemella asaccharolytica			AGGGTTTGATCATGGCTCAGGACGAACGCTGGCGGCGTGCCTAATACATGCAAGTCGAGCGGACTTTAAGAGTGCTTGCACACTTAAAGTTAGCGGCGAACGGGTGAGTAACACGTAAAGAACCTACCTTATAGACAGGGACAACTATTGGAAACGATAGCTAATACCTGATAAGAAAGAAACTCGCATGAGAGAAGTTCGAAAGTCGGAGCAATCTGACACTATAAGATGGCTTTGCGGTGCATTAGCTAGTTGGTAGGGTAAAAGCCTACCAAGGCGACGATGCATAGCCGACCTGAGAGGGTGATCGGCCACATTGGGACTGAGACACGGCCCAGACTCCTACGGGAGGCAGCA	D_0__Bacteria;D_1__Firmicutes;D_2__Bacilli;D_3__Bacillales;D_4__Family XI;D_5__Gemella;D_6__Gemella asaccharolytica	0	0	0	0	0	0	0	0	0	0	0	0	0	0	0	0	0	0	0	0	0	0	0	0	0	0	0	0	0	0	0	0	0	0	0	0	0	0	0	0	0	0	0	0
b989926782f434c60ae8c4b04645ffd5	Gemella asaccharolytica			AGGGTTTGATTATGGCTCAGGACGAACGCTGGCGGCGTGCCTAATACATGCAAGTCGAGCGAACTTTAAGAGTGCTTGCACACTTAAAGTTAGCGGCGAACGGGTGAGTAACACGTAAAGAACCTACCTTATAGACAGGGACAACTATTGGAAACGATAGCTAATACCTGATAAGAAAGAAACTCGCATGAGAGAAGTTCGAAAGTCGGAGTAATCTGACACTATAAGATGGCTTTGCGGTGCATTAGCTAGTTGGTAGGGTAAAAGCCTACCAAGGCGACGATGCATAGCCGACCTGAGAGGGTGATCGGCCACATTGGGACTGAGACACGGCCCAGACTCCTACGGGAGGCAGCA	D_0__Bacteria;D_1__Firmicutes;D_2__Bacilli;D_3__Bacillales;D_4__Family XI;D_5__Gemella;D_6__Gemella asaccharolytica	0	0	0	0	0	0	0	0	0	0	0	0	0	0	0	0	0	0	0	0	0	0	0	0	0	0	0	0	0	0	0	0	0	0	0	0	0	0	0	0	0	0	0.216761	0
71f28b0c64a236884b8683537e7ebd7d	Gemella haemolysans	100	99.4413	AGAGTTTGATTATGGCTCAGGACGAACGCTGGCGGCGTGCCTAATACATGCAAGTCGAGCGAAGTTTTTCTGGTGCTTGCACCGGAAAAACTTAGCGGCGAACGGGTGAGTAACACGTAAAGAACCTGCCTCATAGACTGGGACAACTATTGGAAACGATAGCTAATACCGGATAACAGCATTAACTGCATGGTTGATGTTTAAAAGTTGGTTTTGCTAACACTATGAGATGGCTTTGCGGTGCATTAGCTAGTTGGTGGGGTAAAGGCCTACCAAGGCGACGATGCATAGCCGACCTGAGAGGGTGATCGGCCACACTGGGACTGAGACACGGCCCAGACTCCTACGGGAGGCAGCA	D_0__Bacteria;D_1__Firmicutes;D_2__Bacilli;D_3__Bacillales;D_4__Family XI;D_5__Gemella	0	0	0	0	0	0	0	0	0	0	0	0	0	0	0	0	0	0	0	0	0	0	0	0	0	0	0	0	0	0	0	0	0	0	0	0	0	0	0.24793	0	0	0	0	0
f4ae85a198813968eba7ba40e4b0510f	Gemella haemolysans	100	98.8827	AGGGTTTGATTATGGCTCAGGACGAACGCTGGCGGCGTGCCTAATACATGCAAGTCGAGCGAAGTTTTTCTGGTGCTTGCACCGGAAAAACTTAGCGGCGAACGGGTGAGTAACACGTAAAGAACCTGCCTCATAGACTGGGACAACTATTGGAAACGATAGCTAATACCGGATAACAGCATTAACTGCATGGTTGATGTTTGAAAGTTGGTTTTGCTAACACTATGAGATGGCTTTGCGGTGCATTAGCTAGTTGGTGGGGTAAAGGCCTACCAAGGCGACGATGCATAGCCGACCTGAGAGGGTGATCGGCCACACTGGGACTGAGACACGGCCCAGACTCCTACGGGAGGCAGCA	D_0__Bacteria;D_1__Firmicutes;D_2__Bacilli;D_3__Bacillales;D_4__Family XI;D_5__Gemella;D_6__uncultured bacterium	0	0	0	0	0	0	0	0	0	0	0	0	0	0	0	0	0	0	0	0	0	0	0	0	0	0	0	0	0	0	0	0	0	0	0	0	0	0	0.406979	0	0	0	0	0
15ad2b387ad3fb25c47d096a60e167ee	Gemella morbillorum	100	99.4413	AGAGTTTGATTATGGCTCAGGACGAACGCTGGCGGCGTGCCTAATACATGCAAGTCGAGCGAAGTTTTTCTGGTGCTTGCACTAGAAAAACTTAGCGGCGAACGGGTGAGTAACACGTAAAGAACCTGCCTCATAGACTGGGACAACTATTGGAAACGATAGCTAATACCGGATAACAGTATTTCTCGCATGAGAGATATTTAAAAGTTGGTTATGCTAACACTATGAGATGGCTTTGCGGTGCATTAGCTAGTTGGTGGGGTAAAGGCCCACCAAGGCGACGATGCATAGCCGACCTGAGAGGGTGATCGGCCACACTGGGACTGAGACACGGCCCAGACTCCTACGGGAGGCAGCA	D_0__Bacteria;D_1__Firmicutes;D_2__Bacilli;D_3__Bacillales;D_4__Family XI;D_5__Gemella;D_6__uncultured organism	0	0	0	0	0	0	0	0	0	0	0	0	0	0	0	0	0	0	0	0	0	0	0	0	0	0	0	0	0	0	0	0	0	0	0	0	0	0	0	0	0.0562806	0	0	0
4fd72e1ff8298605ac55dc6d0a671b65	Gemella morbillorum	100	99.162	AGGGTTTGATTATGGCTCAGGACGAACGCTGGCGGCGTGCCTAATACATGCAAGTCGAGCGAAGTTTTTCTGGTGCTTGCACTAGAAAAACTTAGCGGCGAACGGGTGAGTAACACGTAAAGAACCTGCCTCATAGACTGGGACAACTATTGGAAACGATAGCTAATACCGGATAACAGTATTTCTCGCATGAGAGATATTTAAAAGTTGGTTATGCTAACACTATGAGATGGCTTTGCGGTGCATTAGCTAGTTGGTGGGGTAAAGGCCCACCAAGGCGACGATGCATAGCCGACCTGAGAGGGTGATCGGCCACACTGGGACTGAGACACGGCCCAGACTCCTACGGGAGGCAGCA	D_0__Bacteria;D_1__Firmicutes;D_2__Bacilli;D_3__Bacillales;D_4__Family XI;D_5__Gemella;D_6__uncultured organism	0	0	0	0	0	0	0.410131	0	0	0	0	0	0	0	0	0	0	0	0	0	0	0	0	0	0	0	0	0	0	0	0	0	0	0	0	0	0	0	0	0	0	0	0	0
8ea8d7cceb7fe95cc3a3602343462ffa	Gemella morbillorum	99.162	99.4366	AGGGTTTGATTATGGCTCAGGACGAACGCTGGCGGCGTGCCTAATACATGCAAGTCGAGCGAAGTTTTTCTGGTGCTTGCACTAGAAAAACTTAGCGGCGAACGGGTGAGTAACACGTAAAGAACCTGCCTCATAGACTGGGACAACTATTGGAAACGATAGCTAATACCGGATAACAGTATTTCTCGCATGAGAGATATTTAAAAGTTGGTTATGCTAACACTATGAGATGGCTTTGCGGTGCATTAGCTAGTTGGTGGGGTAAAGGCCTACCAAGGCGACGATGCATAGCCGACCTGAGAGGGTGATCGGCCACACTGGGACTGAGACACGGCCCAGACTCCTACGGGAGGCAGCA	D_0__Bacteria;D_1__Firmicutes;D_2__Bacilli;D_3__Bacillales;D_4__Family XI;D_5__Gemella	0	0	0	0	0	0	0	0	0	0	0	0	0	0	0	0	0	0	0.0289059	0	0	0	0	0	0	0	0	0	0	0	0	0	0	0	0	0	0	0	0	0	0	0	0	0
349686b73651fbb5bee0d0b69441b547	Gemella sanguinis	99.1643	99.7191	AGGGTTTGATCATGGCTCAGGACGAACGCTGGCGGCGTGCCTAATACATGCAAGTCGAGCGAAGTTTTTCTGGTGCTTGCACTAGAAAAACTTAGCGGCGAACGGGTGAGTAACACGTAAAGAACCTGCCTCATAGACGGGGACAACTATTGGAAACGATAGCTAATACCGGATAACAGCATAAATCGCATGATATATGTTTAAAAGTTGGTTTCGGCTAACACTATGAGATGGCTTTGCGGTGCATTAGCTAGTTGGTGGGGTAAAGGCCTACCAAGGCGACGATGCATAGCCGACCTGAGAGGGTGATCGGCCACACTGGGACTGAGACACGGCCCAGACTCCTACGGGAGGCAGCA	D_0__Bacteria;D_1__Firmicutes;D_2__Bacilli;D_3__Bacillales;D_4__Family XI;D_5__Gemella	0	0	0	0	0	0	0	0	0	0	0	0	0	0	0	0	0	0	0	0	0	0	0	0	0	0	0	0	0	0	0	0	0	0	0	0	0	0	0	0	0	0	0	0
5fa89ebeaec097aa3b71f055c2c5b4c2	Gemella sanguinis	99.1643	99.4382	AGGGTTTGATTATGGCTCAGGACGAACGCTGGCGGCGTGCCTAATACATGCAAGTCGAGCGAAGTTTTTCTGGTGCTTGCACTAGAAAAACTTAGCGGCGAACGGGTGAGTAACACGTAAAGAACCTGCCTCATAGACGGGGACAACTATTGGAAACGATAGCTAATACCGGATAACAGCATAAATCGCATGATATATGTTTAAAAGTTGGTTTCGGCTAACACTATGAGATGGCTTTGCGGTGCATTAGCTAGTTGGTGGGGTAAAGGCCTACCAAGGCGACGATGCATAGCCGACCTGAGAGGGTGATCGGCCACACTGGGACTGAGACACGGCCCAGACTCCTACGGGAGGCAGCA	D_0__Bacteria;D_1__Firmicutes;D_2__Bacilli;D_3__Bacillales;D_4__Family XI;D_5__Gemella	0	0	0	0	0	0	0	0	0	0	0	0	0	0	0	0	0	0	0	0	0	0	0	0	0	0.0345423	0	0	0	0	0	0	0	0	0	0	0	0	0.24793	0	0	0	0	0
1bdc2068f96fcebae7765ef70da0c49a	Gemella sp.	100	99.4413	AGAGTTTGATTATGGCTCAGGACGAACGCTGGCGGCGTGCCTAATACATGCAAGTCGAGCGAAGTTTTTCTGGTGCTTGCACTAGAAAAACTTAGCGGCGAACGGGTGAGTAACACGTAAAGAACCTGCCTCATAGACTGGGACAACTATTGGAAACGATAGCTAATACCGGATAACAGCATTAACTGCATGGTTGATGTTTGAAAGTTGGTTTTGCTAACACTATGAGATGGCTTTGCGGTGCATTAGCTAGTTGGTGGGGTAAAGGCCTACCAAGGCGACGATGCATAGCCGACCTGAGAGGGTGATCGGCCACACTGGGACTGAGACACGGCCCAGACTCCTACGGGAGGCAGCA	D_0__Bacteria;D_1__Firmicutes;D_2__Bacilli;D_3__Bacillales;D_4__Family XI;D_5__Gemella;D_6__uncultured bacterium	0	0	0	0	0	0	0	0	0	0	0	0	0	0	0	0	0	0	0	0	0	0	0	0	0	0	0	0	0	0	0	0	0	0	0	0	0	0	0.24793	0	0	0	0	0
683131d49cd81d7eadb9ca6210d80a1a	Gemella sp.	100	99.162	AGGGTTTGATCATGGCTCAGGACGAACGCTGGCGGCGTGCCTAATACATGCAAGTCGAGCGAAGTTTTTCTGGTGCTTGCACTAGAAAAACTTAGCGGCGAACGGGTGAGTAACACGTAAAGAACCTGCCTTATAGACTGGGACAACTATTGGAAACGATAGCTAATACCGGATAACAGCATTAACTGCATGGTTGATGTTTAAAAGTTGGTTTTGCTAACACTATGAGATGGCTTTGCGGTGCATTAGCTAGTTGGTGGGGTAAAGGCCTACCAAGGCGACGATGCATAGCCGACCTGAGAGGGTGATTGGCCACACTGGGACTGAGACACGGCCCAGACTCCTACGGGAGGCAGCA	D_0__Bacteria;D_1__Firmicutes;D_2__Bacilli;D_3__Bacillales;D_4__Family XI;D_5__Gemella;D_6__uncultured bacterium	0	0	0	0	0	0	0	0	0	0	0	0	0	0	0	0	0	0	0	0	0	0	0	0	0	0	0	0	0	0	0	0	0	0	0	0	0	0	0.13566	0	0	0	0	0
963017499f4ca53dad65de8c52318e7c	Megasphaera elsdenii			AGGGTTTGATCATGGCTCAGGACGAACGCTGGCGGCGTGCTTAACACATGCAAGTCGAACGAGAAGAGATGAGAAGCTTGCTTCTTATCAATTCGAGTGGCAAACGGGTGAGTAACGCGTAAGCAACCTGCCCTTCAGATGGGGACAACAGCTGGAAACGGCTGCTAATACCGAATACGTTCTTTTTGTCGCATGGCAGAGAGAAGAAAGGGAGGCTCTTCGGAGCTTTCGCTGAAGGAGGGGCTTGCGTCTGATTAGCTAGTTGGAGGGGTAACGGCCCACCAAGGCGACGATCAGTAGCCGGTCTGAGAGGATGAACGGCCACATTGGGACTGAGACACGGCCCAGACTCCTACGGGAGGCAGCA	D_0__Bacteria;D_1__Firmicutes;D_2__Negativicutes;D_3__Selenomonadales;D_4__Veillonellaceae;D_5__Megasphaera;D_6__Megasphaera elsdenii	0	0	0	0	0	0	0	0	0	0	0	0	0	0	0	0	0	0	0	0	0	0	0	0	0	0	0	0	0	0	0	0	0	0	0	0	0	0	0	0	0	0	0	0
aea773ef43f31feffc7d27b1c1266bd6	Megasphaera elsdenii	99.455	99.1781	AGGGTTTGATCATGGCTCAGGACGAACGCTGGCGGCGTGCTTAACACATGCAAGTCGAACGAGAAGAGATGAGAAGCTTGCTTCTTATCGATTCGAGTGGCAAACGGGTGAGTAACGCGTAAGCAACCTGCCCTCTAGATGGGGACAACAGCTGGAAACGGCTGCTAATACCGAATACGTTCTTTCTGCCGCATGGCAGAGGGAAGAAAGGGAGGCTCTTCGGAGCTTTCGCTGGAGGAGGGGCTTGCGTCTGATTAGCTAGTTGGAGGGGTAACGGCCCACCAAGGCGACGATCAGTAGCCGGTCTGAGAGGATGAACGGCCACATTGGGACTGAGACACGGCCCAGACTCCTACGGGAGGCAGCA	D_0__Bacteria;D_1__Firmicutes;D_2__Negativicutes;D_3__Selenomonadales;D_4__Veillonellaceae;D_5__Megasphaera	0	0	0	0	0	0	0	0	0	0	0	0	0	0	0	0	0	0	0	0	0	0	0	0	0	0	0	0	0	0	0	0	0	0	0.342897	0	0	0	0	0	0	0	0	0
c819bee55e480a77f454540d5a2643e4	Megasphaera elsdenii			AGAGTTTGATCATGGCTCAGGACGAACGCTGGCGGCGTGCTTAACACATGCAAGTCGAACGAGAAGAGATGAGAAGCTTGCTTCTTATCAATTCGAGTGGCAAACGGGTGAGTAACGCGTAAGCAACCTGCCCTTCAGATGGGGACAACAGCTGGAAACGGCTGCTAATACCGAATGCGTTCTTTTTGTCGCATGGCAGAGAGAAGAAAGGGAGGCTCTTCGGAGCTTTCGCTGAAGGAGGGGCTTGCGTCTGATTAGCTAGTTGGAGGGGTAACGGCCCACCAAGGCGACGATCAGTAGCCGGTCTGAGAGGATGAACGGCCACATTGGGACTGAGACACGGCCCAGACTCCTACGGGAGGCAGCA	D_0__Bacteria;D_1__Firmicutes;D_2__Negativicutes;D_3__Selenomonadales;D_4__Veillonellaceae;D_5__Megasphaera;D_6__Megasphaera elsdenii	0	0	0	0	0	0	0	0	0	0.0318878	0	0	0	0	0	0	0	0	0	0	0	0	0	0	0	0	0	0	0	0	0	0	0	0	0	0	0	0	0	0	0	0	0	0
ca5c2344a54b4bcff8d098a012f4989b	Megasphaera elsdenii	100	99.1826	AGGGTTTGATTATGGCTCAGGACGAACGCTGGCGGCGTGCTTAACACATGCAAGTCGAACGAGAAGAGATAAGAAGCTTGCTTCTTATCGATTCGAGTGGCAAACGGGTGAGTAACGCGTAAGCAACCTGCCCTCTAGATGGGGACAACAGCTGGAAACGGCTGCTAATACCGAATACGTTCTTTCTGTCGCATGGCAGAAGGAAGAAAGGGAGGCTCTTCGGAGCTTTCGCTGGAGGAGGGGCTTGCGTCTGATTAGCTAGTTGGAGGGGTAACGGCCCACCAAGGCGACGATCAGTAGCCGGTCTGAGAGGATGAACGGCCACATTGGGACTGAGACACGGCCCAGACTCCTACGGGAGGCAGCA	D_0__Bacteria;D_1__Firmicutes;D_2__Negativicutes;D_3__Selenomonadales;D_4__Veillonellaceae;D_5__Megasphaera	0	0	0	0	0	0	0	0	0	0	0	0	0	0	0	0	0	0	0	0	0	0	0	0	0	0	0	0	0	0	0	0	0	0	0.267258	0	0	0	0	0	0	0	0	0
d5b669c40eacb21a45681e2a6fc1eb7f	Megasphaera elsdenii	99.455	99.1781	AGGGTTTGATTATGGCTCAGGACGAACGCTGGCGGCGTGCTTAACACATGCAAGTCGAACGAGAAGAGATGAGAAGCTTGCTTCTTATCGATTCGAGTGGCAAACGGGTGAGTAACGCGTAAGCAACCTGCCCTCTAGATGGGGACAACAGCTGGAAACGGCTGCTAATACCGAATACGTTCTTTCTGTCGCATGGCAGAGGGAAGAAAGGGAGGCTCTTCGGAGCTTTCGCTGGAGGAGGGGCTTGCGTCTGATTAGCTAGTTGGAGGGGTAACGGCCCACCAAGGCGACGATCAGTAGCCGGTCTGAGAGGATGAACGGCCACATTGGGACTGAGACACGGCCCAGACTCCTACGGGAGGCAGCA	D_0__Bacteria;D_1__Firmicutes;D_2__Negativicutes;D_3__Selenomonadales;D_4__Veillonellaceae;D_5__Megasphaera	0	0	0	0	0	0	0	0	0	0	0	0	0	0	0	0	0	0	0	0	0	0	0	0.483344	0	0	0	0	0	0	0	0	0	0	0	0	0	0	0	0	0	0	0	0
fa4aae397bcdbe95b36d2a2afe8a9f29	Megasphaera elsdenii	100	99.1826	AGAGTTTGATTATGGCTCAGGACGAACGCTGGCGGCGTGCTTAACACATGCAAGTCGAACGAGAAGAGATAAGAAGCTTGCTTCTTATCGATTCGAGTGGCAAACGGGTGAGTAACGCGTAAGCAACCTGCCCTCTAGATGGGGACAACAGCTGGAAACGGCTGCTAATACCGAATACGTTCTTTCTGTCGCATGGCAGAGGGAAGAAAGGGAGGCTCTTCGGAGCTTTCGCTGGAGGAGGGGCTTGCGTCTGATTAGCTAGTTGGAGGGGTAACGGCCCACCAAGGCGACGATCAGTAGCCGGTCTGAGAGGATGAACGGCCACATTGGGACTGAGACACGGCCCAGACTCCTACGGGAGGCAGCA	D_0__Bacteria;D_1__Firmicutes;D_2__Negativicutes;D_3__Selenomonadales;D_4__Veillonellaceae;D_5__Megasphaera	0	0	0	0	0	0	0	0	0	0	0	0	0	0	0	0	0	0	0	0	0	0	0	0	0	0	0	0	0	0	0	0	0	0	0.196662	0	0	0	0	0	0	0	0	0
1fe22332d5c69f7cfc1e53da0f73ee8a	Megasphaera indica			AGAGTTTGATTATGGCTCAGGACGAACGCTGGCGGCGTGCTTAACACATGCAAGTCGAACGAGAAGAGATGAGAAGCTTGCTTCTTATTGATTCGAGTGGCAAACGGGTGAGTAACGCGTAAGCAACCTGCCCTCTAGATGGGGACAACAGCTGGAAACGGCTGCTAATACCGAATACGTTCTTTCTGTCGCATGGCAGAAGGAAGAAAGGGAGGCTCTTCGGAGCTTTCGCTGGAGGAGGGGCTTGCGTCTGATTAGCTAGTTGGAGGGGTAACGGCCCACCAAGGCGACGATCAGTAGCCGGTCTGAGAGGATGAACGGCCACATTGGGACTGAGACACGGCCCAGACTCCTACGGGAGGCAGCA	D_0__Bacteria;D_1__Firmicutes;D_2__Negativicutes;D_3__Selenomonadales;D_4__Veillonellaceae;D_5__Megasphaera;D_6__Megasphaera indica	0	0	0	0	0	0	0	0	0	0	0	0	0	0	0	0	0	0	0	0	0	0	0	0	0	0	0	0	0	0	0	0	0	0	0.484091	0	0	0	0	0	0	0	0	0
90396bfbf7b67d7b82df526a5c0b7c57	Megasphaera indica			AGAGTTTGATCCTGGCTCAGGACGAACGCTGGCGGCGTGCTTAACACATGCAAGTCGAACGAGAAGAGATAAGAAGCTTGCTTCTTATCGATTCGAGTGGCAAACGGGTGAGTAACGCGTAAGCAACCTGCCCTCTAGATGGGGACAACAGCTGGAAACGGCTGCTAATACCGAATACGTTCTTTCTGTCGCATGGCAGAAGGAAGAAAGGGAGGCTCTTCGGAGCTTTCGCTGGAGGAGGGGCTTGCGTCTGATTAGCTAGTTGGTGAGGTAATGGCTCACCAAGCCGACGATAGGTAGGGGTGCTGAGAGGCAGATCCCCCACATTGGGACTGAGACACGGCCCAAACTCCTACGGGAGGCAGCA	D_0__Bacteria;D_1__Firmicutes;D_2__Negativicutes;D_3__Selenomonadales;D_4__Veillonellaceae;D_5__Megasphaera;D_6__Megasphaera indica	0	0	0	0	0	0	0	0	0	0	0	0	0	0	0	0	0	0	0	0	0	0	0	0	0	0	0	0	0	0	0	0	0	0	0.0100852	0	0	0	0	0	0	0	0	0
263cbf28126780d97d7f62cf70d95dc5	Megasphaera massiliensis	100	97.5342	AGGGTTTGATTATGGCTCAGGACGAACGCTGGCGGCGTGCTTAACACATGCAAGTCGAACGAGAAGAGATGAGAAGCTTGCTTCTTATTAATTCTAGTGGCAAACGGGTGAGTAACGCGTAAGCAACCTGCCCTTCAGATGGGGACAACAGCTGGAAACGGCTGCTAATACCGAATACGTTCATTTCGCCGCATGACGGAATGAAGAAAGGGAGGCCTTCGGGCTTTCGCTGGAGGAGGGGCTTGCGTCTGATTAGCTAGTTGGAGGGGTAACGGCCCACCAAGGCGACGATCAGTAGCCGGTCTGAGAGGATGAACGGCCACATTGGGACTGAGACACGGCCCAGACTCCTACGGGAGGCAGCA	D_0__Bacteria;D_1__Firmicutes;D_2__Negativicutes;D_3__Selenomonadales;D_4__Veillonellaceae;D_5__Megasphaera;D_6__uncultured organism	0	0	0	0	0	0	0	0	0	0	0	0	0	0	0	0	0	0	0	0	0	0	0	0	0	0	0	0	0	0	0	0	0	0	0	0	0	0	0	0	0	0	0	0
2d5387d7ee9eb6cef1a0371218dba2f9	Megasphaera massiliensis	100	98.6301	AGGGTTTGATTATGGCTCAGGACGAACGCTGGCGGCGTGCTTAACACATGCAAGTCGAACGAGAAGAGATGAGAAGCTTGCTTCTTATCAATTCGAGTGGCAAACGGGTGAGTAACGCGTAAGCAACCTGCCCTTCAGATGGGGACAACAGCTGGAAACGGCTGCTAATACCGAATACGTTCTTTCCGCCGCATGACGGAATGAAGAAAGGGAGGCCTTCGGGCTTTCGCTGGAGGAGGGGCTTGCGTCTGATTAGCTAGTTGGAGGGGTAACGGCCCACCAAGGCGACGATCAGTAGCCGGTCTGAGAGGATGAACGGCCACATTGGGACTGAGACACGGCCCAGACTCCTACGGGAGGCAGCA	D_0__Bacteria;D_1__Firmicutes;D_2__Negativicutes;D_3__Selenomonadales;D_4__Veillonellaceae;D_5__Megasphaera	0	0	0	0	0	0	0	0	0	0	0	0	0	0	0	0	0	0	0	0	0	0	0	0	0	0	0	0	0	0	0	0	0	0	0	0	0	0	0	0	0	0	0	0
3fb7f0afa68a085bc46a42fc41cc646e	Megasphaera massiliensis	100	98.3562	AGGGTTTGATTATGGCTCAGGACGAACGCTGGCGGCGTGCTTAACACATGCAAGTCGAACGAGAAGCGATGAGAAGCTTGCTTCTTATCAATTCGAGTGGCAAACGGGTGAGTAACGCGTAAGCAACCTGCCCTTCAGATGGGGACAACAGCTGGAAACGGCTGCTAATACCGAATACGTTCTTTCCGCCGCATGACGGGATGAAGAAAGGGAGGCCTTCGGGCTTTCGCTGGAGGAGGGGCTTGCGTCTGATTAGCTAGTTGGAGGGGCAACGGCCCACCAAGGCGACGATCAGTAGCCGGTCTGAGAGGATGAACGGCCACATTGGGACTGAGACACGGCCCAGACTCCTACGGGAGGCAGCA	D_0__Bacteria;D_1__Firmicutes;D_2__Negativicutes;D_3__Selenomonadales;D_4__Veillonellaceae;D_5__Megasphaera	0	0	0	0	0	0	0	0	0	0	0	0	0	0	0	0	0	0	0	0	0	0.241331	0	0	0	0	0	0	0	0	0	0	0	0	0	0	0	0	0	0	0	0	0	0
54fd067e7e4e07a660c8931d91f16d78	Megasphaera massiliensis	100	98.3562	AGGGTTTGATTATGGCTCAGGACGAACGCTGGCGGCGTGCTTAACACATGCAAGTCGAACGAGAAGACATGAGAAGCTTGCTTCTTATCGATTCGAGTGGCAAACGGGTGAGTAACGCGTAAGCAACCTGCCCTTCAGATGGGGACAACAGCTGGAAACGGCTGCTAATACCGAATACGTTCTTTCCGCCGCATGACGGGAAGAAGAAAGGGAGGCCTTCGGGCTTTCGCTGGAGGAGGGGCTTGCGTCTGATTAGCTGGTTGGAGGGGTAACGGCCCACCAAGGCGACGATCAGTAGCCGGTCTGAGAGGATGAACGGCCACATTGGGACTGAGACACGGCCCAGACTCCTACGGGAGGCAGCA	D_0__Bacteria;D_1__Firmicutes;D_2__Negativicutes;D_3__Selenomonadales;D_4__Veillonellaceae;D_5__Megasphaera	0	0	0	0	0	0	0	0	0	0	0	0	0	0	0	0	0	0	0	0	0	0	0	0	0	0	0	0	0	0	0	0	0	0	0	0	0	0	0	0	0	0	0	0
6730f00d0d812b38857b14b51c9d7181	Megasphaera massiliensis	100	97.8082	AGAGTTTGATTATGGCTCAGGACGAACGCTGGCGGCGTGCTTAACACATGCAAGTCGAACGAGAAGAGATGAGAAGCTTGCTTCTTATTAATTCTAGTGGCAAACGGGTGAGTAACGCGTAAGCAACCTGCCCTTCAGATGGGGACAACAGCTGGAAACGGCTGCTAATACCGAATACGTTCATTTCGCCGCATGACGAGATGAAGAAAGGGAGGCCTTCGGGCTTTCGCTGGAGGAGGGGCTTGCGTCTGATTAGCTAGTTGGAGGGGTAACGGCCCACCAAGGCGACGATCAGTAGCCGGTCTGAGAGGATGAACGGCCACATTGGGACTGAGACACGGCCCAGACTCCTACGGGAGGCAGCA	D_0__Bacteria;D_1__Firmicutes;D_2__Negativicutes;D_3__Selenomonadales;D_4__Veillonellaceae;D_5__Megasphaera	0	0	0	0	0	0	0	0	0	0	0	0	0	0	0	0	0	0	0	0	0	0	0	0	0	0	0	0	0	0	0	0	0	0	0	0	0	0	0	0	0	0	0.200822	0
69caa68ec6dda11c235c54c2638ede17	Megasphaera massiliensis	100	98.0822	AGGGTTTGATTATGGCTCAGGACGAACGCTGGCGGCGTGCTTAACACATGCAAGTCGAACGAGAAGAGATGAGAAGCTTGCTTCTTATTAATTCGAGTGGCAAACGGGTGAGTAACGCGTAAGCAACCTGCCCTTCAGATGGGGACAACAGCTGGAAACGGCTGCTAATACCGAATACGTTCTTTCCACCGCATGACGGGAAGAAGAAAGGGAGGCCTTCGGGCTTTCGCTGGAGGAGGGGCTTGCGTCTGATTAGCTGGTTGGAGGGGTAACGGCTCACCAAGGCGACGATCAGTAGCCGGTCTGAGAGGATGAACGGCCACATTGGGACTGAGACACGGCCCAGACTCCTACGGGAGGCAGCA	D_0__Bacteria;D_1__Firmicutes;D_2__Negativicutes;D_3__Selenomonadales;D_4__Veillonellaceae;D_5__Megasphaera	0	0	0	0	0	0	0	0	0	0	0	0	0	0	0	0	0	0	0	0	0	0	0	0	0	0	0	0	0	0	0	0	0	0	0	0	0	0	0	0	0	0	0	0
7cace9b9d85d8b45257ee062ed1e0b95	Megasphaera massiliensis	100	98.6301	AGGGTTTGATCATGGCTCAGGACGAACGCTGGCGGCGTGCTTAACACATGCAAGTCGAACGAGAAGAGATGAGAAGCTTGCTTCTTATCAATTCGAGTGGCAAACGGGTGAGTAACGCGTAAGCAACCTGCCCTTCAGATGGGGACAACAGCTGGAAACGGCTGCTAATACCGAATACGTTCTTTCCGCCGCATGACGGAATGAAGAAAGGGAGGCCTTCGGGCTTTCGCTGGAGGAGGGGCTTGCGTCTGATTAGCTGGTTGGAGGGGTAACGGCCCACCAAGGCGACGATCAGTAGCCGGTCTGAGAGGATGAACGGCCACATTGGGACTGAGACACGGCCCAGACTCCTACGGGAGGCAGCA	D_0__Bacteria;D_1__Firmicutes;D_2__Negativicutes;D_3__Selenomonadales;D_4__Veillonellaceae;D_5__Megasphaera	0	0	0	0	0	0	0	0	0	0	0	0	0	0	0	0	0	0	0	0	0	0	0	0	0	0	0	0	0	0	0	0	0	0	0	0	0	0	0	0	0	0	0	0
9f2b6d947cc8b975f76e547bb978f9ff	Megasphaera massiliensis	100	97.5342	AGGGTTTGATTATGGCTCAGGACGAACGCTGGCGGCGTGCTTAACACATGCAAGTCGAACGAGAAGACATGAGAAGCTTGCTTCTTATCGATTCTAGTGGCAAACGGGTGAGTAACGCGTAAGCAACCTGCCCTTCAGATGGGGACAACAGCTGGAAACGGCTGCTAATACCGAATACGTTCTTTCCGCCGCATGACGGGATGAAGAAATGGAGGCCTTCGGGCTTTCGCTGGAGGAGGGGCTTGCGTCTGATTAGCTGGTTGGAGGGGTAACGGCCCACCAAGGCGACGATCAGTAGCCGGTCTGAGAGGATGAACGGCCACATTGGGACTGAGACACGGCCCAGACTCCTACGGGAGGCAGCA	D_0__Bacteria;D_1__Firmicutes;D_2__Negativicutes;D_3__Selenomonadales;D_4__Veillonellaceae;D_5__Megasphaera	0	0	0	0	0	0	0	0	0	0	0	0	0	0	0	0	0	0	0	0	0	0	0	0	0	0	0	0	0	0	0	0	0	0	0	0	0	0	0	0	0	0	0	0
a1a23d7cdbaaf1dd736855efe375df92	Megasphaera massiliensis	100	97.8082	AGGGTTTGATTATGGCTCAGGACGAACGCTGGCGGCGTGCTTAACACATGCAAGTCGAACGAGAAGACATGAGAAGCTTGCTTCTTATCGATTCTAGTGGCAAACGGGTGAGTAACGCGTAAGCAACCTGCCCTTCAGATGGGGACAACAGCTGGAAACGGCTGCTAATACCGAATACGTTCTTTCCGCCGCATGACGGAATGAAGAAAGGGAGGCCTTCGGGCTTTCGCTGGAGGAGGGGCTTGCGTCTGATTAGCTAGTTGGAGGGGTAACGGCCCACCAAGGCGACGATCAGTAGCCGGTCTGAGAGGATGAACGGCCACATTGGGACTGAGACACGGCCCAGACTCCTACGGGAGGCAGCA	D_0__Bacteria;D_1__Firmicutes;D_2__Negativicutes;D_3__Selenomonadales;D_4__Veillonellaceae;D_5__Megasphaera;D_6__uncultured organism	0	0	0	0	0	0	0	0	0	0	0	0	0	0	0	0	0	0	0	0	0	0	0	0	0	0	0	0	0	0	0	0	0	0	0	0	0	0	0	0	0	0	0.0669408	0
af59062cf65a6fe3df45ae86e9f36644	Megasphaera massiliensis	100	98.9041	AGGGTTTGATTATGGCTCAGGACGAACGCTGGCGGCGTGCTTAACACATGCAAGTCGAACGAGAAGAGATGAGAAGCTTGCTTCTTATCAATTCGAGTGGCAAACGGGTGAGTAACGCGTAAGCAACCTGCCCTTCAGATGGGGACAACAGCTGGAAACGGCTGCTAATACCGAATACGTTCTTTCCGCCGCATGACGGGATGAAGAAAGGGAGGCCTTCGGGCTTTCGCTGGAGGAGGGGCTTGCGTCTGATTAGCTAGTTGGAGGGGTAACGGCCCACCAAGGCGACGATCAGTAGCCGGTCTGAGAGGATGAACGGCCACATTGGGACTGAGACACGGCCCAGACTCCTACGGGAGGCAGCA	D_0__Bacteria;D_1__Firmicutes;D_2__Negativicutes;D_3__Selenomonadales;D_4__Veillonellaceae;D_5__Megasphaera	0	0	0	0	0	0	0	0	0	0	0	0	0	0	0	0	0	0	0	0	0	0.768449	0	0	0	0	0	0	0	0	0	0	0	0	0	0	0	0	0	0	0	0	0	0
bf578f732d5f50b9e566284da61918da	Megasphaera massiliensis	100	98.6301	AGGGTTTGATTATGGCTCAGGACGAACGCTGGCGGCGTGCTTAACACATGCAAGTCGAACGAGAAGAGATGAGAAGCTTGCTTCTTATCAATTCGAGTGGCAAACGGGTGAGTAACGCGTAAGCAACCTGCCCTTCAGATGGGGACAACAGCTGGAAACGGCTGCTAATACCGAATACGTTCTTTCCGCCGCATGACGGGATGAAGAAAGGGAGGCCTTCGGGCTTTCGCTGGAGGAGGGGCTTGCGTCTGATTAGCTGGTTGGAGGGGTAACGGCCCACCAAGGCGACGATCAGTAGCCGGTCTGAGAGGATGAACGGCCACATTGGGACTGAGACACGGCCCAGACTCCTACGGGAGGCAGCA	D_0__Bacteria;D_1__Firmicutes;D_2__Negativicutes;D_3__Selenomonadales;D_4__Veillonellaceae;D_5__Megasphaera	0	0	0	0	0	0	0	0	0	0	0	0	0	0	0	0	0	0	0	0	0	0.165121	0	0	0	0	0	0	0	0	0	0	0	0	0	0	0	0	0	0	0	0	0	0
08364941a7d3db23a66ab4c88655363a	Megasphaera micronuciformis	99.1914	98.913	AGGGTTTGATTATGGCTCAGGACGAACGCTGGCGGCGTGCTTAACACATGCAAGTCGAACGAGAGCGTAGAGAAAGCTTGCTTTTTCTACAATCTAGTGGCAAACGGGTGAGTAACGCGTAAACAACCTGCCCTACGGATGGGGACAACAGCTGGAAACGGCTGCTAATACCGAATACGTTCCGGAAGTCGCATGACTATCGGAAGAAAGGATGGCCTCTATTTATAAGCTATCGCCGGAGGAGGGGTTTGCGTCTGATTAGCTAGTTGGAGGGGTAACGGCCCACCAAGGCGACGATCAGTAGCCGGTCTGAGAGGATGAACGGCCACATTGGAACTGAGACACGGTCCAGACTCCTACGGGAGGCAGCA	D_0__Bacteria;D_1__Firmicutes;D_2__Negativicutes;D_3__Selenomonadales;D_4__Veillonellaceae;D_5__Megasphaera;D_6__uncultured Megasphaera sp.	0	0	0	0	0	0	0	0	0	0	0	0	0	0	0	0	0	0	0.0722648	0	0	0	0	0	0	0	0	0	0	0	0	0	0	0	0	0	0	0	0	0	0	0	0	0
59b964b6cf05c4b8b00e2ad7a901f72f	Megasphaera micronuciformis	99.1914	99.1848	AGGGTTTGATTCTGGCTCAGGACGAACGCTGGCGGCGTGCTTAACACATGCAAGTCGAACGAGAGCGTAGAGAAAGCTTGCTTTTTCTACAATCTAGTGGCAAACGGGTGAGTAACGCGTAAACAACCTGCCCTACGGATGGGGACAACAGCTGGAAACGGCTGCTAATACCGAATACGTTCCGAAAGTCGCATGACTATCGGAAGAAAGGATGGCCTCTATTTATAAGCTATCGCCGGAGGAGGGGTTTGCGTCTGATTAGCTAGTTGGAGGGGTAACGGCCCACCAAGGCGACGATCAGTAGCCGGTCTGAGAGGATGAACGGCCACATTGGAACTGAGACACGGTCCAAACTCCTACGGGAGGCAGCA	D_0__Bacteria;D_1__Firmicutes;D_2__Negativicutes;D_3__Selenomonadales;D_4__Veillonellaceae;D_5__Megasphaera;D_6__uncultured Megasphaera sp.	0	0	0	0	0	0	0	0	0	0	0	0	0	0	0	0	0	0	0	0	0	0	0	0	0	0	0	0	0	0	0	0	0	0	0	0	0	0	0	0	0.0246227	0	0	0
6a1d6cd5a076af0fdd5be58cbacbf736	Megasphaera micronuciformis	99.7305	99.4595	AGAGTTTGATTATGGCTCAGGACGAACGCTGGCGGCGTGCTTAACACATGCAAGTCGAACGAGAGCGTAGAGAAAGCTTGCTTTTTCTACAATCTAGTGGCAAACGGGTGAGTAACGCGTAAACAACCTGCCCTACGGATGGGGACAACAGCTGGAAACGGCTGCTAATACCGAATACGTTCCGAAAGTCGCATGACTGTCGGAAGAAAGGATGGCCTCTATTTATAAGCTATCGCCGGAGGAGGGGTTTGCGTCTGATTAGCTAGTTGGAGGGGTAACGGCCCACCAAGGCGACGATCAGTAGCCGGTCTGAGAGGATGAACGGCCACATTGGAACTGAGACACGGTCCAGACTCCTACGGGAGGCAGCA	D_0__Bacteria;D_1__Firmicutes;D_2__Negativicutes;D_3__Selenomonadales;D_4__Veillonellaceae;D_5__Megasphaera;D_6__uncultured Megasphaera sp.	0	0	0	0	0	0	0	0	0	0	0	0	0	0	0	0	0	0	0	0	0	0	0	0	0	0	0	0	0	0	0	0	0	0	0	0	0.0457935	0	0	0	0	0	0	0
77595b292231382ec646085e0704041e	Megasphaera micronuciformis	99.1914	99.7283	AGGGTTTGATCATGGCTCAGGACGAACGCTGGCGGCGTGCTTAACACATGCAAGTCGAACGAGAGCGTAGAGAAAGCTTGCTTTTTCTACAATCTAGTGGCAAACGGGTGAGTAACGCGTAAACAACCTGCCCTACGGATGGGGACAACAGCTGGAAACGGCTGCTAATACCGAATACGTTCCGAAAGTCGCATGACTGTCGGAAGAAAGGATGGCCTCTATTTATAAGCTATCGCCGGAGGAGGGGTTTGCGTCTGATTAGCTAGTTGGAGGGGTAACGGCCCACCAAGGCGACGATCAGTAGCCGGTCTGAGAGGATGAACGGCCACATTGGAACTGAGACACGGTCCAGACTCCTACGGGAGGCAGCA	D_0__Bacteria;D_1__Firmicutes;D_2__Negativicutes;D_3__Selenomonadales;D_4__Veillonellaceae;D_5__Megasphaera;D_6__uncultured Megasphaera sp.	0	0	0	0	0	0	0	0	0	0.376276	0	0	0	0	0	0	0	0	0	0	0	0	0	0	0	0	0	0	0	0	0	0	0	0	0	0	0	0	0	0	0	0	0	0
ae66a2e91c9a77d4bb60bc4f150c8025	Megasphaera micronuciformis	99.7305	99.4595	AGAGTTTGATCATGGCTCAGGACGAACGCTGGCGGCGTGCTTAACACATGCAAGTCGAACGAGAGCGTAGAGAAAGCTTGCTTTTTCTACAATCTAGTGGCAAACGGGTGAGTAACGCGTAAACAACCTGCCCTACGGATGGGGACAACAGCTGGAAACGGCTGCTAATACCGAATACGTTCCGAAAGTCGCATGACTATCGGAAGAAAGGATGGCCTCTATTTATAAGCTATCGCCGGAGGAGGGGTTTGCGTCTGATTAGCTAGTTGGAGGGGTAACGGCCCACCAAGGCGACGATCAGTAGCCGGTCTGAGAGGATGAACGGCCACATTGGAACTGAGACACGGTCCAGACTCCTACGGGAGGCAGCA	D_0__Bacteria;D_1__Firmicutes;D_2__Negativicutes;D_3__Selenomonadales;D_4__Veillonellaceae;D_5__Megasphaera;D_6__uncultured Megasphaera sp.	0	0	0	0	0	0	0	0	0	0	0.03544	0	0	0.088663	0	0	0	0	0	0	0	0	0	0	0	0	0	0	0	0	0	0	0	0	0	0	0	0	0	0	0	0	0	0
fc1ec90323b5b3261c3e2550c34e73ba	Megasphaera micronuciformis	99.7305	99.1892	AGAGTTTGATTATGGCTCAGGACGAACGCTGGCGGCGTGCTTAACACATGCAAGTCGAACGAGAGCGTAGAGAAAGCTTGCTTTTTCTACAATCTAGTGGCAAACGGGTGAGTAACGCGTAAACAACCTGCCCTACGGATGGGGACAACAGCTGGAAACGGCTGCTAATACCGAATACGTTCCGAAAGTCGCATGACTATCGGAAGAAAGGATGGCCTCTATTTATAAGCTATCGCCGGAGGAGGGGTTTGCGTCTGATTAGCTAGTTGGAGGGGTAACGGCCCACCAAGGCGACGATCAGTAGCCGGTCTGAGAGGATGAACGGCCACATTGGAACTGAGACACGGTCCAGACTCCTACGGGAGGCAGCA	D_0__Bacteria;D_1__Firmicutes;D_2__Negativicutes;D_3__Selenomonadales;D_4__Veillonellaceae;D_5__Megasphaera;D_6__uncultured Megasphaera sp.	0	0	0	0	0	0	0	0	0	0	0	0	0	0	0	0	0	0	0	0	0	0	0	0	0	0	0	0	0	0	0	0	0	0.140617	0	0	0	0	0	0	0	0	0	0
47ded4aad701f9da3bd45c89a973e799	Megasphaera sp.	100	98.3784	AGGGTTTGATTATGGCTCAGGACGAACGCTGGCGGCGTGCTTAACACATGCAAGTCGAACGAGAGATGAAAAGAAGCTTGCTTCTTTTGAGATCGAGTGGCAAACGGGTGAGTAACGCGTAAACAACCTGCCCTACGGATGGGGACAACAGTTGGAAACGACTGCTAATACCGAATACGCTCATAGAGTCGCATGACTTTATGAGGAAAAGATGGCCTCTATATTATGCTATCGCCGGAGGAGGGGTTTGCGTCTGATTAGCTAGTTGGAGGGGTAACGGCCCACCAAGGCGACGATCAGTAGCCGGTCTGAGAGGATGAACGGCCACATTGGAACTGAGACACGGTCCAGACTCCTACGGGAGGCAGCA	D_0__Bacteria;D_1__Firmicutes;D_2__Negativicutes;D_3__Selenomonadales;D_4__Veillonellaceae;D_5__Megasphaera	0	0	0	0	0	0	0	0	0	0	0	0	0	0	0	0	0	0	0	0	0	0	0	0	0.193743	0	0	0	0	0	0	0	0	0	0	0	0	0	0	0	0	0	0	0
51fce6d5167a4a6af2000ca9237c8975	Megasphaera sp.	100	99.4521	AGAGTTTGATCATGGCTCAGGACGAACGCTGGCGGCGTGCTTAACACATGCAAGTCGAACGAGAAGACATGAGAAGCTTGCTTCTTATCGATTCGAGTGGCAAACGGGTGAGTAACGCGTAAGCAACCTGCCCTTCAGATGGGGACAACAGCTGGAAACGGCTGCTAATACCGAATACGTTCTTTCCGCCGCATGACGGGAAGAAGAAAGGGAGGCCTTCGGGCTTTCGCTGGAGGAGGGGCTTGCGTCTGATTAGCTAGTTGGAGGGGTAACGGCCCACCAAGGCGACGATCAGTAGCCGGTCTGAGAGGATGAACGGCCACATTGGGACTGAGACACGGCCCAGACTCCTACGGGAGGCAGCA	D_0__Bacteria;D_1__Firmicutes;D_2__Negativicutes;D_3__Selenomonadales;D_4__Veillonellaceae;D_5__Megasphaera	0	0	0	0	0	0	0	0	0	0	0	0	0	0	0	0	0	0	0	0	0	0	0	0	0	0	0	0	0	0	0	0	0	0	0	0	0	0	0	0	0	0	0.10838	0
7970746a3f0dfe60354ca9c3bf1549ee	Megasphaera sp.	100	98.1081	AGGGTTTGATTATGGCTCAGGACGAACGCTGGCGGCGTGCTTAACACATGCAAGTCGAACGAGAGATGAAAAGAAGCTTGCTTCTTTTGAGATCGAGTGGCAAACGGGTGAGTAACGCGTAAACAACCTGCCCTACGGATGGGGACAACAGTTGGAAACGACTGCTAATACCGAATACGCTCATAGAGTCGCATGACTTTATGAGGAAAAGATGGCCTCTATATTATGCTATTGCCGGAGGAGGGGTTTGCGTCTGATTAGCTAGTTGGAGGGGTAACGGCCCACCAAGGCGACGATCAGTAGCCGGTCTGAGAGGATGAACGGCCACATTGGAACTGAGACACGGTCCAGACTCCTACGGGAGGCAGCA	D_0__Bacteria;D_1__Firmicutes;D_2__Negativicutes;D_3__Selenomonadales;D_4__Veillonellaceae;D_5__Megasphaera	0	0	0	0	0	0	0	0	0	0	0	0	0	0	0	0	0.0628392	0	0	0	0	0	0	0	0	0	0	0	0	0	0	0	0	0	0	0	0	0	0	0	0	0	0	0
7e977e8cc2135dede87bae9e5535cf19	Megasphaera sp.	100	99.1892	AGGGTTTGATCATGGCTCAGGACGAACGCTGGCGGCGTGCTTAACACATGCAAGTCGAACGAGAGATGAAAAGAAGCTTGCTTCTTTTGAGATCGAGTGGCAAACGGGTGAGTAACGCGTAAACAACCTGCCCTACGGATGGGGACAACAGTTGGAAACGACTGCTAATACCGAATACGCTCATAGAGCCGCATGACTTTATGAGGAAAGGATGGCCTCTATATTATGCTATCGCCGGAGGAGGGGTTTGCGTCTGATTAGCTAGTTGGAGGGGTAACGGCCCACCAAGGCGACGATCAGTAGCCGGTCTGAGAGGATGAACGGCCACATTGGAACTGAGACACGGTCCAGACTCCTACGGGAGGCAGCA	D_0__Bacteria;D_1__Firmicutes;D_2__Negativicutes;D_3__Selenomonadales;D_4__Veillonellaceae;D_5__Megasphaera	0	0	0	0	0	0	0	0	0	0	0	0	0	0	0	0	0	0	0	0	0	0	0	0	0	0	0	0	0	0	0	0	0	0	0	0	0.166819	0	0	0	0	0	0	0
b0a2f99bfd4579d45a6edf62701f1bdb	Megasphaera stantonii	100	97.8261	AGGGTTTGATTATGGCTCAGGACGAACGCTGGCGGCGTGCTTAACACATGCAAGTCGAACGGGAGGACATGGGAAGCTTGCTTCCTATGGACTCTAGTGGCAAACGGGTGAGTAACGCGTAAGCAACCTGCCCTCCGGATGGGGACAACAGCTGGAAACGGCTGCTAATACCGAATGCGTTTCTACTGCCGCATGACAGTGGAAAGAAAGGTGGCCTCTGAATATGCTACCGCCGGGGGAGGGGCTTGCGTCTGATTAGCTAGTTGGAGGGGTAACGGCCCACCAAGGCGACGATCAGTAGCCGGTCTGAGAGGATGAACGGCCACATTGGAACTGAGACACGGTCCAGACTCCTACGGGAGGCAGCA	D_0__Bacteria;D_1__Firmicutes;D_2__Negativicutes;D_3__Selenomonadales;D_4__Veillonellaceae;D_5__Megasphaera;D_6__uncultured Ruminococcus sp.	0	0	0	0	0	0	0	0	0	0	0	0	0.0560224	0	0	0	0	0	0	0	0	0	0	0	0	0	0	0	0	0	0	0	0	0	0	0	0	0	0	0	0	0	0	0
a80915ea2cdbd6aa15966beb33f9552d	Mycoplasma hominis			AGGGTTTGATTATGGCTCAGGATGAACGCTGGCTGTGTGCCTAATACATGCATGTCGAGCGAGGTTAGCAATAACCTAGCGGCGAATGGGTGAGTAACACGTGCTTAATCTACCTTTTAGATTGGAATACCCATTGGAAACAATGGCTAATGCCGGATACGCATGGAACCGCATGGTTCCGTTGTGAAAGGCGCTGTAAGGCGCCACTAAAAGATGAGGGTGCGGAACATTAGTTAGTTGGTGAGGTAATGGCCCACCAAGACTATGATGTTTAGCCGGGTCGAGAGACTGAACGGCCACATTGGGACTGAGATACGGCCCAAACTCCTACGGGAGGCAGCA	D_0__Bacteria;D_1__Tenericutes;D_2__Mollicutes;D_3__Mycoplasmatales;D_4__Mycoplasmataceae;D_5__Mycoplasma;D_6__Mycoplasma hominis	0	0	0	0	0	0	0	0	0	0	0	0	0.560224	0	0	0	0	0	0	0	0	0	0	0	0	0	0	0	0	0	0	0	0	0	0	0	0	0	0	0	0	0	0.178509	0
d615ae9390fa4d6b12507f95f89c6633	Mycoplasma salivarium			AGGGTTTGATCATGGCTCAGGATGAACGCTGGCTGTGTGCCTAATACATGCATGTCGAGCGGAAGTAGCAATACTTTAGCGGCGAATGGGTGAGTAACACGTGCTTAATCTACCCCTTAGATTGGAATACCTAATGGAAACATTGGTTAATGCCGGATACGCATGGAGTCGCATGACTCCGTTGTGAAAGGGGCCTTTAAAGCTCCGCTAAGAGATGAGGGTGCGGAACATTAGCTAGTTGGTGAGGTAACGGCCCACCAAGGCTATGATGTTTAGCCGGGTCGAGAGACTGAACGGCCACATTGGGACTGAGATACGGCCCAAACTCCTACGGGAGGCAGCA	D_0__Bacteria;D_1__Tenericutes;D_2__Mollicutes;D_3__Mycoplasmatales;D_4__Mycoplasmataceae;D_5__Mycoplasma;D_6__Mycoplasma salivarium ATCC 23064	0	0	0	0	0	0	0	0	0	0	0	0	0	0	0	0	0	0	0	0	0	0	0	0	0	0	0	0	0	0	0	0	0	0	0	0	0	0	0.0561351	0	0	0	0	0
59532bbcebf91b853b189f4e2d832590	Olegusella massiliensis	100	99.1329	AGAGTTTGATTATGGCTCAGGATGAACGCTGGCGGCACGCTTAACACATGCAAGTCGAACGATTAAAGCACCTTCGGGTGTGTATAGAGTGGCGAACGGCTGAGTAACACGTGGGCAACCTGCCCTTCAGTTCGGAATAGCTACGGGAAACCGTGGGTAATACCGGATGATCCACCTCCCTCGCATGAAGGAGGTGGCAAAGATTTATCGCTGAAGGATGGGCCCGCGGCCTGTTAGCTTGTTGGTGAGGTAACGGCTCACCAAGGCAGTAATGGGTAGCCGGGTTGAGAGACCGACCGGCCAGATTGGGACTGAGACACGGCCCAGACTCCTACGGGAGGCGGCA	D_0__Bacteria;D_1__Actinobacteria;D_2__Coriobacteriia;D_3__Coriobacteriales;D_4__Atopobiaceae;D_5__Atopobium;D_6__Atopobium sp. oral taxon 810 str. F0209	0	0	0	0	0	0	0	0	0	0	0	0	0	0	0	0	0	0	0	0	0	0	0	0	0	0	0	0	0	0.0204092	0	0	0	0	0	0	0	0	0	0	0	0	0	0
5a4af81c0dac3aa2f227b1dc87218117	Olegusella massiliensis	100	99.711	AGAGTTTGATCATGGCTCAGGATGAACGCTGGCGGCACGCTTAACACATGCAAGTCGAACGATTAAAGCACCTTCGGGTGTGTATAGAGTGGCGAACGGCTGAGTAACACGTGGGCAACCTGCCCTTCAGTTCGGAATAGCTACGGGAAACCGTGGGTAATACCGGATGATCCACCTCCCTCGCATGAAGGAGGTGGCAAAGATTTATCGCTGAAGGATGGGCCCGCGGCCTGTTAGCTTGTTGGTGAGGTAACGGCTCACCAAGGCAGTAATGGGTAGCCGGGTTGAGAGACCGACCGGCCAGATTGGGACTGAGACACGGCCCAGACTCCTACGGGAGGCAGCA	D_0__Bacteria;D_1__Actinobacteria;D_2__Coriobacteriia;D_3__Coriobacteriales;D_4__Atopobiaceae;D_5__Atopobium;D_6__Atopobium sp. oral taxon 810 str. F0209	0	0	0	0	0	0	0	0	0	0	0.23036	0	0	0	0	0	0	0	0	0	0	0	0	0	0	0	0	0	0	0	0	0	0	0	0	0	0	0	0	0	0	0	0.0159383	0
60d806f0f750b13c1d0a18893f6491b1	Olegusella massiliensis	100	99.1329	AGGGTTTGATTATGGCTCAGGATGAACGCTGGCGGCACGCTTAACACATGCAAGTCGAACGATTAAAGCACCTTCGGGTGTGTATAGAGTGGCGAACGGCTGAGTAACACGTGGGCAACCTGCCCTTCAGTTCGGAATAGCTACGGGAAACCGTGGGTAATACCGGATGATCCACCTCCCTCGCATGAAGGAGGTGGCAAAGATTTATCGCTGAAGGATGGGCCCGCGGCCTGTTAGCTTGTTGGTGAGGTAACGGCTCACCAAGGCAGTAATGGGTAGCCGGGTTGAGAGACCGACCGGCCAGATTGGGACTGAGACACGGCCCAGACTCCTACGGGAGGCAGCA	D_0__Bacteria;D_1__Actinobacteria;D_2__Coriobacteriia;D_3__Coriobacteriales;D_4__Atopobiaceae;D_5__Atopobium;D_6__Atopobium sp. oral taxon 810 str. F0209	0	0.383772	0	0	0	0	0	0	0	0	0	0.132898	0	0	0	0	0	0	0	0	0	0	0	0.248204	0.336201	0	0	0	0	0	0	0	0.100355	0	0	0	0	0	0	0	0	0	0	0
a8c49f952583a6da397f395eeb2e5f96	Olegusella massiliensis	100	99.422	AGGGTTTGATCATGGCTCAGGATGAACGCTGGCGGCACGCTTAACACATGCAAGTCGAACGATTAAAGCACCTTCGGGTGTGTATAGAGTGGCGAACGGCTGAGTAACACGTGGGCAACCTGCCCTTCAGTTCGGAATAGCTACGGGAAACCGTGGGTAATACCGGATGATCCACCTCCCTCGCATGAAGGAGGTGGCAAAGATTTATCGCTGAAGGATGGGCCCGCGGCCTGTTAGCTTGTTGGTGAGGTAACGGCTCACCAAGGCAGTAATGGGTAGCCGGGTTGAGAGACCGACCGGCCAGATTGGGACTGAGACACGGCCCAGACTCCTACGGGAGGCAGCA	D_0__Bacteria;D_1__Actinobacteria;D_2__Coriobacteriia;D_3__Coriobacteriales;D_4__Atopobiaceae;D_5__Atopobium;D_6__Atopobium sp. oral taxon 810 str. F0209	0	0	0	0.0518058	0	0	0	0	0	0	0	0	0	0	0	0	0	0	0	0	0	0	0	0	0	0	0	0	0.0757927	0	0	0	0	0	0	0	0	0	0	0	0	0	0	0
b5a4b5ccfe8fd36af452f83c27615669	Olegusella massiliensis	100	98.5549	AGGGTTTGATTATGGCTCAGGATGAACGCTGGCGGCACGCTTAACACATGCAAGTCGAACGATTAAAGCATCTTCGGATGTGTATAGAGTGGCGAACGGCTGAGTAACACGTGGGCAACCTGCCCTTCAGTTCGGAATAGCTACGGGAAACCGTGGGTAATACCGGATGATCCACCTCCCTCGCATGAAGGAGGTGGCAAAGATTTATCGCTGAAGGATGGGCCCGCGGCCTGTTAGCTTGTTGGTGAGGTAACGGCTCACCAAGGCAGTAATGGGTAGCCGGGTTGAGAGACCGACCGGCCAGATTGGGACTGAGACACGGCCCAGACTCCTACGGGAGGCAGCA	D_0__Bacteria;D_1__Actinobacteria;D_2__Coriobacteriia;D_3__Coriobacteriales;D_4__Atopobiaceae;D_5__Atopobium;D_6__Atopobium sp. oral taxon 810 str. F0209	0	0	0	0	0	0	0	0	0	0	0	0	0	0	0	0	0.0399886	0	0	0	0	0	0	0	0	0	0	0	0	0	0	0	0	0	0	0	0	0	0	0	0	0	0	0
186dce3975f47c17aa70044f9f3143a3	other Gardnerella	100.576	95.702	AGGGTTTGATTATGGCTCAGGACGAACGCTGGCGGCGTGCTTAACACATGCAAGTCGAACGGAAAGGCCTCAGCTTGCTGGGGTACTCGAGTGGCGAACGGGTGAGTAATGCGTGACCAACCTGCCCCATGCTCCAGAATAGCTCTTGGAAACGGGTGGTAATGCTGGATGCTCCAACTTGACGCATGTCTTGTTGGGAAAGTGTTTAGTGGCATGGGATGGGGTCGCGTCCTATCAGCTTGTAGGCGGGGTAATGGCCCACCTAGGCTTCGACGGGTAGCCGGCCTGAGAGGGCGGACGGCCACATTGGGACTGAGATACGGCCCAGACTCCTACGGGAGGCAGCA	D_0__Bacteria;D_1__Actinobacteria;D_2__Actinobacteria;D_3__Bifidobacteriales;D_4__Bifidobacteriaceae;D_5__Gardnerella	0	0	0	0	0	0	0	0	0	0	0	0	0	0	0	0	0	0	0	0	0	0	0	0	0	0	0	0	0	0	0	0	0	0	0	0	0	0.00645474	0	0	0	0	0	0
27b83e4d3276da16d504b4c16d5eba52	other Gardnerella	69.7861	93.1034	AGGGTTTGATCATGGCTCAGGATGAACGCCGGCGGTGTGCCTAATACATGCAAGTCTAGCGCACTGGCTCAACTGATATGACGTGCTTGCACTGAATTGACGTTGGATTACCAGTGAGCGGCGGACGGGTGAGTAACACGTGGGCAACCTGCCCTGAAGCGGGGGATAACATCTGGAAACAGGTGGTAATGCTGGATGCTCCAACTTGACGCATGTCTTGTTGGGAAAGTGTTTAGTGGCATGGGATGGGGTCGCGTCCTATCAGCTTGTAGGCGGGGTAATGGCCCACCTAGGCTTCGACGGGTAGCCGGCCTGAGAGGGCGGACGGCCACATTGGGACTGAGATACGGCCCAGACTCCTACGGGAGGCAGCA	D_0__Bacteria;D_1__Actinobacteria;D_2__Actinobacteria;D_3__Bifidobacteriales;D_4__Bifidobacteriaceae;D_5__Gardnerella	0	0	0	0	0	0	0	0	0	0	0	0	0	0	0	0	0	0	0	0	0	0	0	0	0	0	0	0	0	0	0	0	0	0	0	0	0	0	0	0	0	0	0	0
f81f773b48c1e3e67cbb204a6a1bbb79	other Gardnerella	78.9625	99.635	CTCTTTTTCTCCTTTCTCCTTCTTCCCTCTTTCTTCTTTCTTCCCCCCTTCCCTTCTCCCTTTCTCTTCCCCTCTTTCTGGTTGGTGAGAGTGGCGAACGGGTGAGTAATGCGTGACCAACCTGCCCCATGCTCCAGAATAGCTCTTGGAAACGGGTGGTAATGCTGGATGCTCCAACTTGACGCATGTCTTGTTGGGAAAGTGTTTAGTGGCATGGGATGGGGTCGCGTCCTATCAGCTTGTAGGCGGGGTAATGGCCCACCTAGGCTTCGACGGGTAGCCGGCCTGAGAGGGCGGACGGCCACATTGGGACTGAGATACGGCCCAGACTCCTACGGGAGGCAGCA	D_0__Bacteria;D_1__Actinobacteria;D_2__Actinobacteria;D_3__Bifidobacteriales;D_4__Bifidobacteriaceae;D_5__Gardnerella	0	0	0	0	0	0	0	0	0	0	0	0	0	0	0	0	0	0	0	0	0	0	0	0	0	0	0	0	0	0	0	0	0	0	0	0	0	0	0	0	0	0	0	0
fb1fe7bd8ab348643fe64d37d291b0f2	other Gemella	94.3978	99.4065	AGAGTTTGATTATGGCTCAGGACGAACGCTGGCGGCGTGCCTAATACATGCAAGTCGAGCGGACTTTAAGAGTGCTTGCACACTTAAAGTTAGCGGCGAACGGGTGAGTAACACGTAAAGAACCTACCTTATAGACAGGGACAACTATTGGAAACGATAGCTAATACCTGATAAGAAAGAAACTCGCATGAGAGAAGTTCGAAAGTCGGAGTAATCTGACACTATAAGATGGCTTTGCGGTGCATTAGCTAGTTGGTAGGGTAAAAGCCTACCAAGGCGACGATGCATAGCCGACCTGAGAGGGTGATCGGCCACATTGGGACTGAGACACGGCCCAGACTCCTACGGGAGGCAGCA	D_0__Bacteria;D_1__Firmicutes;D_2__Bacilli;D_3__Bacillales;D_4__Family XI;D_5__Gemella;D_6__Gemella asaccharolytica	0	0	0	0	0	0	0	0	0	0	0	0	0	0	0	0	0	0	0	0	0	0	0	0	0	0	0	0	0	0	0	0	0	0	0	0	0	0	0	0	0	0	0	0
f40062fb57b405a97ed5a0f6cc7ff121	other Megasphaera	100	96.9863	AGGGTTTGATTATGGCTCAGGACGAACGCTGGCGGCGTGCTTAACACATGCAAGTCGAACGAGAAGACATGAGAAGCTTGCTTCTTATCGATTCTAGTGGCAAACGGGTGAGTAACGCGTAAGCAACCTGCCCTTCAGATGGGGACAACAGCTGGAAACGGCTGCTAATACCGAATGCGTTCATTCCGCCGCATGACGGAATGAAGAAAGGGAGGCCTTCGGGCTTTCGCTGGAGGAGGGGCTTGCGTCTGATTAGCTGGTTGGAGGGGTAACGGCCCACCAAGGCGACGATCAGTAGCCGGTCTGAGAGGATGAACGGCCACATTGGGACTGAGACACGGCCCAGACTCCTACGGGAGGCAGCA	D_0__Bacteria;D_1__Firmicutes;D_2__Negativicutes;D_3__Selenomonadales;D_4__Veillonellaceae;D_5__Megasphaera	0	0	0	0	0	0	0	0	0	0	0	0	0	0	0	0	0	0	0	0	0	0	0	0	0	0	0	0	0	0	0	0	0	0	0	0	0	0	0	0	0	0	0	0
a3b798502fba7a925b5c46a883306cb9	other Megasphaera	100	96.9863	AGGGTTTGATTATGGCTCAGGACGAACGCTGGCGGCGTGCTTAACACATGCAAGTCGAACGAGAAGACATGAGAAGCTTGCTTCTTATCGATTCTAGTGGCAAACGGGTGAGTAACGCGTAAGCAACCTGCCCTTCAGATGGGGACAACAGCTGGAAACGGCTGCTAATACCGAATACGTTCATTTCGCCGCATGACGAGATGAAGAAAGGGAGGCCTTCGGGCTTTCGCTGGAGGAGGGGCTTGCGTCTGATTAGCTGGTTGGAGGGGTAACGGCCCACCAAGGCGACGATCAGTAGCCGGTCTGAGAGGATGAACGGCCACATTGGGACTGAGACACGGCCCAGACTCCTACGGGAGGCAGCA	D_0__Bacteria;D_1__Firmicutes;D_2__Negativicutes;D_3__Selenomonadales;D_4__Veillonellaceae;D_5__Megasphaera	0	0	0	0	0	0	0	0	0	0	0	0	0	0	0	0	0	0	0	0	0	0	0	0	0	0	0	0	0	0	0	0	0	0	0	0	0	0	0	0	0	0	0.229511	0
e194144bfac2a8920de0e7d395ed00ad	other Megasphaera	91.6216	99.705	AGGGTTTGATTATGGCTCAGGACGAACGCTGGCGGCGTGCTTAACACATGCAAGTCGAACGAGAGGATATGGAAAGCTTGCTTTCTATAAAATCTAGTGGCAAACGGGTGAGTAACGCGTAAACAACCTGCCCTTCGGATGGGGACAACAGCTGGAAACGGCTGCTAATACCGAATACGTTCTTTTCATCGCATGGTGAGAAGAAGAAAGGACGGCCTCTACACAAAGCGGTCGCCGAAGGAGGGGTTTGCGTCTGATTAGCTAGTTGGAGGGGTAACGGCCCAACAAGGCGACGATCAGTAGCCGGTCTGAGAGGATGAACGGCCACATTGGGACTGAGACACGGCCCAGACTCCTACGGGAGGCAGCA	D_0__Bacteria;D_1__Firmicutes;D_2__Negativicutes;D_3__Selenomonadales;D_4__Veillonellaceae;D_5__Megasphaera;D_6__Veillonellaceae bacterium KA00182	0	0	0	0	0	0	0	0	0	0	0	0	0.315126	0	0	0	0	0	0	0	0	0	0	0	0	0	0	0	0	0	0	0	0	0	0	0	0	0	0	0	0	0	0	0
dfabb2729778c83b290978c8fb724518	other Sneathia	101.462	91.0663	AGGGTTTGATTATGGCTCAGGATAAACGCTGACAGAATGCTTAACACATGCAAGTCGATGATGAGCTATAGCTTGCTATAGTAAGTCATGGCGGACGGGTGAGTAACGCGTAAAGAACTTACCTCATAGACTGGGATAACAGAGGGAAACTTCTGATAAGACTGGATAAGTTGGTTATTAGCATTAATAACGAATGAAAGGGGACACTATGAGAGAGCTTTGCGTCCTATTAGCTAGTTGGTGGGGTAAAGGCCTACCAAGGCGATGATAGGTAGCCGGCCTGAGAGGGTGGACGGCCACAAGGGGACTGAGATACGGCCCTTACTCCTACGGGAGGCAGCA	D_0__Bacteria;D_1__Fusobacteria;D_2__Fusobacteriia;D_3__Fusobacteriales;D_4__Leptotrichiaceae;D_5__Sneathia	0	0	0	0	0	0	0	0	0	0	0	0	0	0	0	0	0.188518	0	0	0	0	0	0	0	0	0	0	0	0	0	0	0	0	0	0	0	0	0	0	0	0	0	0	0
046a407e507265c905aed90d033250fd	Sneathia amnii			AGGGTTTGATCATGGCTCAGGATAAACGCTGACCGCATGCTTAACACATGCAAGTCTATGAGGAAGTTTAGCTTGCTAAATGGACTCATGGCGGACGGGTGAGTAACGCGTAAAGAACTTGCCCTTTAGACTGGGATAACAGAGGGAAACTTCTGATAATACTGGATAAGTTAGTATATCGCATGATATGCAAATGAAAGCTACGGCACTAAAGGAGAGCTTTGCGTCCTATTAGCTAGTTGGTAAGGTAAGAGCTTACCAAGGCGATGATAGGTAGCCGGCCTGAGAGGGTGGACGGCCACAAGGGGACTGAGATACGGCCCTTACTCCTACGGGAGGCAGCA	D_0__Bacteria;D_1__Fusobacteria;D_2__Fusobacteriia;D_3__Fusobacteriales;D_4__Leptotrichiaceae;D_5__Sneathia;D_6__Sneathia amnii	0	0	0	0	0	0	0	0	0	0	0	0	0	0	0	0	0	0	0	0	0	0	0	0	0	0	0	0	0	0	0	0	0	0	0	0	0	0	0	0	0	0	0	0
1c91637cc535df725874c0d0c14bcf1a	Sneathia amnii			AGGGTTTGATTATGGCTCAGGATAAACGCTGACAGAATGCTTAACACATGCAAGTCTATGAGGAAGTTTAGCTTGCTAAATGGACTCATGGCGGACGGGTGAGTAACGCGTAAAGAACTTGCCCTTTAGACTGGGATAACAGAGGGAAACTTCTGATAATACTGGATAAGTTAGTATATCGCATGATATGCAAATGAAAGCTACGGCACTAAAGGAGAGCTTTGCGTCCTATTAGCTAGTTGGTAAGGTAAGAGCTTACCAAGGCGATGATAGGTAGCCGGCCTGAGAGGGTGGACGGCCACAAGGGGACTGAGATACGGCCCTTACTCCTACGGGAGGCAGCA	D_0__Bacteria;D_1__Fusobacteria;D_2__Fusobacteriia;D_3__Fusobacteriales;D_4__Leptotrichiaceae;D_5__Sneathia;D_6__Sneathia amnii	0	0	0	0	0	0	0	0	0	0	0	0	0	0	0	0	0	0.167735	0	0	0	0	0	0	0	0	0	0	0	0	0	0	0	0	0	0	0	0	0	0	0	0	2.56606	0
2c72016b25ea866b1070fc22155d404a	Sneathia amnii			AGGGTTTGATTATGGCTCAGGATAAACGCTGACAGAATGCTTAACACATGCAAGTCTATGAGGAAGTTTAGCTTGCTAAATGGACTCATGGCGGACGGGTGAGTAACGCGTAAAGAACTTGCCCTTTAGACTGGGATAACAGAGGGAAACTTCTGATAATACTGGATAAGTTAGTATATCGCATGATATACAAATGAAAGCTACGGCACTAAAGGAGAGCTTTGCGTCCTATTAGCTAGTTGGTAAGGTAAGAGCTTACCAAGGCGATGATAGGTAGCCGGCCTGAGAGGGTGGACGGCCACAAGGGGACTGAGATACGGCCCTTACTCCTACGGGAGGCAGCA	D_0__Bacteria;D_1__Fusobacteria;D_2__Fusobacteriia;D_3__Fusobacteriales;D_4__Leptotrichiaceae;D_5__Sneathia;D_6__Sneathia amnii	0	0	0	0	0	0	0	0	0	0	0	0	0.329132	0	0	0	0	0	0	0	0	0	0	0	0	0	0	0	0	0	0	0	0	0	0	0	0	0	0	0	0	0	2.11979	0
3526215e59f7d3d2993fcc40e26e6ba7	Sneathia amnii			AGGGTTTGATTATGGCTCAGGATAAACGCTGCCAGAATGCTTAACACATGCAAGTCTATGAGGAAGTTTAGCTTGCTAAATGGACTCATGGCGGACGGGTGAGTAACGCGTAAAGAACTTGCCCTTTAGACTGGGATAACAGAGGGAAACTTCTGATAATACTGGATAAGTTAGTATATCGCATGATATACAAATGAAAGCTACGGCACTAAAGGAGAGCTTTGCGTCCTATTAGCTAGTTGGTAAGGTAAGAGCTTACCAAGGCGATGATAGGTAGCCGGCCTGAGAGGGTGGACGGCCACAAGGGGACTGAGATACGGCCCTTACTCCTACGGGAGGCAGCA	D_0__Bacteria;D_1__Fusobacteria;D_2__Fusobacteriia;D_3__Fusobacteriales;D_4__Leptotrichiaceae;D_5__Sneathia;D_6__Sneathia amnii	0	0	0	0	0	0	0	0	0	0	0	0	0	0	0	0	0	0	0	0	0	0	0	0	0	0	0	0	0	0	0	0	0	0	0	0	0	0	0	0	0	0	0.207198	0
4e6aba9257143da531144dfa8cf0f846	Sneathia amnii			AGGGTTTGATTATGGCTCAGGATCAACGCTGACAGAATGCTTAACACATGCAAGTCTATGAGGAAGTTTAGCTTGCTAAATGGACTCATGGCGGACGGGTGAGTAACGCGTAAAGAACTTGCCCTTTAGACTGGGATAACAGAGGGAAACTTCTGATAATACTGGATAAGTTAGTATATCGCATGATATGCAAATGAAAGCTACGGCACTAAAGGAGAGCTTTGCGTCCTATTAGCTAGTTGGTAAGGTAAGAGCTTACCAAGGCGATGATAGGTAGCCGGCCTGAGAGGGTGGACGGCCACAAGGGGACTGAGATACGGCCCTTACTCCTACGGGAGGCAGCA	D_0__Bacteria;D_1__Fusobacteria;D_2__Fusobacteriia;D_3__Fusobacteriales;D_4__Leptotrichiaceae;D_5__Sneathia;D_6__Sneathia amnii	0	0	0	0	0	0	0	0	0	0	0	0	0	0	0	0	0	0	0	0	0	0	0	0	0	0	0	0	0	0	0	0	0	0	0	0	0	0	0	0	0	0	0.580154	0
5379514b643c79696810ec4940b613b6	Sneathia amnii			AGAGTTTGATTATGGCTCAGGATAAACGCTGCCAGAATGCTTAACACATGCAAGTCTATGAGGAAGTTTAGCTTGCTAAATGGACTCATGGCGGACGGGTGAGTAACGCGTAAAGAACTTGCCCTTTAGACTGGGATAACAGAGGGAAACTTCTGATAATACTGGATAAGTTAGTATATCGCATGATATGCAAATGAAAGCTACGGCACTAAAGGAGAGCTTTGCGTCCTATTAGCTAGTTGGTAAGGTAAGAGCTTACCAAGGCGATGATAGGTAGCCGGCCTGAGAGGGTGGACGGCCACAAGGGGACTGAGATACGGCCCTTACTCCTACGGGAGGCAGCA	D_0__Bacteria;D_1__Fusobacteria;D_2__Fusobacteriia;D_3__Fusobacteriales;D_4__Leptotrichiaceae;D_5__Sneathia;D_6__Sneathia amnii	0	0	0	0	0	0	0	0	0	0	0	0	0	0	0	0	0	0	0	0	0	0	0	0	0	0	0	0	0	0	0	0	0	0	0	0	0	0	0	0	0	0	0.251825	0
578d2859423e1008fae618deb65951ef	Sneathia amnii			AGAGTTTGATTATGGCTCAGGATAAACGCTGCCCGCATGCTTAACACATGCAAGTCTATGAGGAAGTTTAGCTTGCTAAATGGACTCATGGCGGACGGGTGAGTAACGCGTAAAGAACTTGCCCTTTAGACTGGGATAACAGAGGGAAACTTCTGATAATACTGGATAAGTTAGTATATCGCATGATATACAAATGAAAGCTACGGCACTAAAGGAGAGCTTTGCGTCCTATTAGCTAGTTGGTAAGGTAAGAGCTTACCAAGGCGATGATAGGTAGCCGGCCTGAGAGGGTGGACGGCCACAAGGGGACTGAGATACGGCCCTTACTCCTACGGGAGGCAGCA	D_0__Bacteria;D_1__Fusobacteria;D_2__Fusobacteriia;D_3__Fusobacteriales;D_4__Leptotrichiaceae;D_5__Sneathia;D_6__Sneathia amnii	0	0	0	0	0	0	0	0	0	0	0	0	0	0	0	0	0	0	0	0	0	0	0	0	0	0	0	0	0	0	0	0	0	0	0	0	0	0	0	0	0	0	0.0892544	0
835ca98cf1b0c2c64977bccfa030f8c8	Sneathia amnii			AGGGTTTGATTATGGCTCAGGATAAACGCTGACCGAATGCTTAACACATGCAAGTCTATGAGGAAGTTTAGCTTGCTAAATGGACTCATGGCGGACGGGTGAGTAACGCGTAAAGAACTTGCCCTTTAGACTGGGATAACAGAGGGAAACTTCTGATAATACTGGATAAGTTAGTATATCGCATGATATACAAATGAAAGCTACGGCACTAAAGGAGAGCTTTGCGTCCTATTAGCTAGTTGGTAAGGTAAGAGCTTACCAAGGCGATGATAGGTAGCCGGCCTGAGAGGGTGGACGGCCACAAGGGGACTGAGATACGGCCCTTACTCCTACGGGAGGCAGCA	D_0__Bacteria;D_1__Fusobacteria;D_2__Fusobacteriia;D_3__Fusobacteriales;D_4__Leptotrichiaceae;D_5__Sneathia;D_6__Sneathia amnii	0	0	0	0	0	0	0	0	0	0	0	0	0	0	0	0	0	0	0	0	0	0	0	0	0	0	0	0	0	0	0	0	0	0	0	0	0	0	0	0	0	0	0.219948	0
97395f8db3acc78d0c7cb32328d12640	Sneathia amnii			AGGGTTTGATTATGGCTCAGGATAAACGCTGACAGAATGCTTAACACATGCAAGTCTATGAGGAAGTTTAGCTTGCTAAATGGACTCATGGCGGACGGGTGAGTAACGCGTAAAGAACTTGCCCTTTAGACTGGGATAACAGAGGGAAACTTCTGATAATACTGGATAAGTTAGTATATCGCATGATATGCAAATGAAAGCTACGGCACTAAAGGAGAGCTTTGCGTCCTATTAGCTAGTTGGTAAGGTAAGAGCTTACCAAGGCGATGATAGGTAGCCGGCCTGAGAGGGTGGACGGCCACAAGGGGACTGAGATACGGCCCGTACTCCTACGGGAGGCAGCA	D_0__Bacteria;D_1__Fusobacteria;D_2__Fusobacteriia;D_3__Fusobacteriales;D_4__Leptotrichiaceae;D_5__Sneathia;D_6__Sneathia amnii	0	0	0	0	0	0	0	0	0	0	0	0	0	0	0	0	0	0	0	0	0	0	0	0	0	0	0	0	0	0	0	0	0	0	0	0	0	0	0	0	0	0	0.207198	0
a5dd7b8e6758fa341742b70d86f92f60	Sneathia amnii			AGAGTTTGATCATGGCTCAGGATAAACGCTGACAGCATGCTTAACACATGCAAGTCTATGAGGAAGTTTAGCTTGCTAAATGGACTCATGGCGGACGGGTGAGTAACGCGTAAAGAACTTGCCCTTTAGACTGGGATAACAGAGGGAAACTTCTGATAATACTGGATAAGTTAGTATATCGCATGATATGCAAATGAAAGCTACGGCACTAAAGGAGAGCTTTGCGTCCTATTAGCTAGTTGGTAAGGTAAGAGCTTACCAAGGCGATGATAGGTAGCCGGCCTGAGAGGGTGGACGGCCACAAGGGGACTGAGATACGGCCCTTACTCCTACGGGAGGCAGCA	D_0__Bacteria;D_1__Fusobacteria;D_2__Fusobacteriia;D_3__Fusobacteriales;D_4__Leptotrichiaceae;D_5__Sneathia;D_6__Sneathia amnii	0	0	0	0	0	0	0	0	0	0	0	0	0	0	0	0	0	0	0	0	0	0	0	0	0	0	0	0	0	0	0	0	0	0	0	0	0	0	0	0	0	0	0.168946	0
bb1b713b50af1b94b62580bb363c1c17	Sneathia amnii			AGGGTTTGATTATGGCTCAGGATAAACGCTGACAGCATGCTTAACACATGCAAGTCTATGAGGAAGTTTAGCTTGCTAAATGGACTCATGGCGGACGGGTGAGTAACGCGTAAAGAACTTGCCCTTTAGACTGGGATAACAGAGGGAAACTTCTGATAATACTGGATAAGTTAGTATATCGCATGATATACAAATGAAAGCTACGGCACTAAAGGAGAGCTTTGCGTCCTATTAGCTAGTTGGTAAGGTAAGAGCTTACCAAGGCGATGATAGGTAGCCGGCCTGAGAGGGTGGACGGCCACAAGGGGACTGAGATACGGCCCTTACTCCTACGGGAGGCAGCA	D_0__Bacteria;D_1__Fusobacteria;D_2__Fusobacteriia;D_3__Fusobacteriales;D_4__Leptotrichiaceae;D_5__Sneathia;D_6__Sneathia amnii	0	0	0	0	0	0	0	0	0	0	0	0	0	0	0	0	0	0	0	0	0	0	0	0	0	0	0	0	0	0	0	0	0	0	0	0	0	0	0	0	0	0	0.235887	0
e22c8836eb5808271cdcc09ab69b9f33	Sneathia amnii			AGGGTTTGATTATGGCTCAGGATAAACGCTGACAGAATGCTTAACACATGCAAGTCTATGAGGAAATTTAGCTTGCTAAATGGACTCATGGCGGACGGGTGAGTAACGCGTAAAGAACTTGCCCTTTAGACTGGGATAACAGAGGGAAACTTCTGATAATACTGGATAAGTTAGTATATCGCATGATATGCAAATGAAAGCTACGGCACTAAAGGAGAGCTTTGCGTCCTATTAGCTAGTTGGTAAGGTAAGAGCTTACCAAGGCGATGATAGGTAGCCGGCCTGAGAGGGTGGACGGCCACAAGGGGACTGAGATACGGCCCTTACTCCTACGGGAGGCAGCA	D_0__Bacteria;D_1__Fusobacteria;D_2__Fusobacteriia;D_3__Fusobacteriales;D_4__Leptotrichiaceae;D_5__Sneathia;D_6__Sneathia amnii	0	0	0	0	0	0	0	0	0	0	0	0	0	0	0	0	0	0	0	0	0	0	0	0	0	0	0	0	0	0	0	0	0	0	0	0	0	0	0	0	0	0	0	0
4cba8c68c25d02c1cba4b63884d197f4	Sneathia sanguinegens			AGGGTTTGATTATGGCTCAGGATAAACGCTGACAGAATGCTTAACACATGCAAGTCGATGATGGGAGCTAGCTTGCTAGAAGAAGTCATGGCGGACGGGTGAGTAACGTGTAAAGAACTTACCATATAGACTGGGATAACAGAGGGAAACTTCTGATAATACTGGATAAGTTAGAAGTAGCATTACTAAGTAATGAAAGGTAGCAATACGCTATATGAGAGCTTTGCATCCTATTAGCTAGTTGGTGGGGTAAAAGCCTACCAAGGCGATGATAGGTAGCCGGCCTGAGAGGGTGGACGGCCACAAGGGGACTGAGATACGGCCCTTACTCCTACGGGAGGCAGCA	D_0__Bacteria;D_1__Fusobacteria;D_2__Fusobacteriia;D_3__Fusobacteriales;D_4__Leptotrichiaceae;D_5__Sneathia;D_6__Sneathia sanguinegens	0.345119	0	0	0	0	0	0	0	0	0	0	0	0	0	0	0	0	0	0	0	0	0	0	0	0	0	0	0	0	0	0	0	0	0	0	0	0	0	0	0	0	0	0.401645	0
a1d6ac6394db419122261e36f34f2236	Sneathia sanguinegens			AGAGTTTGATTATGGCTCAGGATAAACGCTGACAGAATGCTTAACACATGCAAGTCGATGATGGGAGCTAGCTTGCTAGAAGAAGTCATGGCGGACGGGTGAGTAACGTGTAAAGAACTTACCATATAGACTGGGATAACAGAGGGAAACTTCTGATAATACTGGATAAGTTAGTAGTAGCATTACTAAGTAATGAAAGGTAGTAATACGCTATATGAGAGCTTTGCATCCTATTAGCTAGTTGGTGGGGTAAAAGCCTACCAAGGCGATGATAGGTAGCCGGCCTGAGAGGGTGGACGGCCACAAGGGGACTGAGATACGGCCCTTACTCCTACGGGAGGCAGCA	D_0__Bacteria;D_1__Fusobacteria;D_2__Fusobacteriia;D_3__Fusobacteriales;D_4__Leptotrichiaceae;D_5__Sneathia;D_6__Sneathia sanguinegens	0	0	0	0	0	0	0	0	0	0	0	0	0	0	0	0	0	0	0	0	0	0	0	0	0	0	0	0	0	0	0	0	0	0	0	0	0	0	0	0	0	0	0	0
a7437caf711efe8a34e992d6551b94ba	Sneathia sanguinegens			AGGGTTTGATTATGGCTCAGGATAAACGCTGACAGAATGCTTAACACATGCAAGTCGATGATGGGAGCTAGCTTGCTAGAAGAAGTCATGGCGGACGGGTGAGTAACGTGTAAAGAACTTACCATATAGACTGGGATAACAGAGGGAAACTTCTGATAATACTGGATAAGTTAGTAGTAGCATTACTAAGTAATGAAAGGTAGCAATACGCTATATGAGAGCTTTGCATCCTATTAGCTAGTTGGTGGGGTAAAAGCCTACCAAGGCGATGATAGGTAGCCGGCCTGAGAGGGTGGACGGCCACAAGGGGACTGAGATACGGCCCTTACTCCTACGGGAGGCAGCA	D_0__Bacteria;D_1__Fusobacteria;D_2__Fusobacteriia;D_3__Fusobacteriales;D_4__Leptotrichiaceae;D_5__Sneathia;D_6__Sneathia sanguinegens	0	0	0	0	0	0	0	0	0	0	0	0	0	0	0	0	0	0	0	0	0	0	0	0	0	0	0	0	0	0	0	0	0	0	0	0	0	0	0	0	0	0	0	0
0712b9bdc882d33a36527397745b5e39	Veillonellaceae bacterium	96.4865	99.7199	AGGGTTTGATTATGGCTCAGGACGAACGCTGGCGGCGTGCTTAACACATGCAAGTCGAACGAGAGGACATGGGAAGCTTGCTTCCTATGAAATCTAGTGGCAAACGGGTGAGTAACGCGTAAACAACCTGCCCTTCGGATGGGGATAACAGCCGGAAACGGCTGCTAATACCGAATACGATCTTTTCGTCGCATGACGGAAAGAAGAAAGGATGGCCTCTATACAAAGCTATCGCCGAAGGAGGGGTTTGCGTCTGATTAGCTGGTTGGAGGGGTAACGGCCCAACAAGGCGATGATCAGTAGCCGGTCTGAGAGGATGAACGGCCACATTGGGACTGAGACACGGCCCAGACTCCTACGGGAGGCAGCA	D_0__Bacteria;D_1__Firmicutes;D_2__Negativicutes;D_3__Selenomonadales;D_4__Veillonellaceae;D_5__Megasphaera;D_6__uncultured Dialister sp.	0	0	0	0	0	0	0	0	0	0	0	0	0	0	0	0	0	0	0	0	0	0	0	0	0	0	0	0	0	0	0	0	0	0	0	0	0	0	0	0	0	0	0.156195	0
1c4c1dae758663158579878c6bd7b9b3	Veillonellaceae bacterium	96.4865	99.4398	AGGGTTTGATTATGGCTCAGGACGAACGCTGGCGGCGTGCTTAACACATGCAAGTCGAACGAGAGGACATGGGAAGCTTGCTTCCTATGGAATCGAGTGGCAAACGGGTGAGTAACGCGTAAACAACCTGCCCTTCGGATGGGGATAACAGCCGGAAACGGCTGCTAATACCGAATACGATCTTTTCGTCGCATGACGAAAAGAAGAAAGGATGGCCTCTATACAAAGCTATCGCCGAAGGAGGGGTTTGCGTCTGATTAGCTGGTTGGAGGGGTAACGGCCCAACAAGGCGATGATCAGTAGCCGGTCTGAGAGGATGAACGGCCACATTGGGACTGAGACACGGCCCAGACTCCTACGGGAGGCAGCA	D_0__Bacteria;D_1__Firmicutes;D_2__Negativicutes;D_3__Selenomonadales;D_4__Veillonellaceae;D_5__Megasphaera	0	0	0	0	0	0	0	0	0	0	0	0	0	0	0	0	0	0	0	0	0	0	0	0	0	0	0	0	0	0	0	0	0	0	0	0	0	0	0	0	0	0	0	0
3f8a6a0946758767fd1c50b4b63af5ec	Veillonellaceae bacterium	96.4865	100	AGGGTTTGATTATGGCTCAGGACGAACGCTGGCGGCGTGCTTAACACATGCAAGTCGAACGAGAGGACATGGGAAGCTTGCTTCCTATGAAATCGAGTGGCAAACGGGTGAGTAACGCGTAAACAACCTGCCCTTCGGATGGGGATAACAGCCGGAAACGGCTGCTAATACCGAATACGATCTTTTCGTCGCATGACGGAAAGAAGAAAGGATGGCCTCTATACAAAGCTATCGCCGAAGGAGGGGTTTGCGTCTGATTAGCTGGTTGGAGGGGTAACGGCCCAACAAGGCGATGATCAGTAGCCGGTCTGAGAGGATGAACGGCCACATTGGGACTGAGACACGGCCCAGACTCCTACGGGAGGCAGCA	D_0__Bacteria;D_1__Firmicutes;D_2__Negativicutes;D_3__Selenomonadales;D_4__Veillonellaceae;D_5__Megasphaera;D_6__uncultured Dialister sp.	0	0	0	0	0	0	0	0	0	0	0	0	0	0	0	0	0	0	0	0	0	0	0	0	0	0	0	0	0	0	0	0	0	0.963229	0	0	0	0	0	0	0	0	0.382519	0
49c51159850f170712e0b187c142ceae	Veillonellaceae bacterium	96.4865	99.7199	AGGGTTTGATTATGGCTCAGGACGAACGCTGGCGGCGTGCTTAACACATGCAAGTCGAACGAGAGGACATGGGAAGCTTGCTTCCTATGAAATCGAGTGGCAAACGGGTGAGTAACGCGTAAACAACCTGCCCTTCGGATGGGGATAACAGTCGGAAACGGCTGCTAATACCGAATACGATCTTTTCGTCGCATGACGGAAAGAAGAAAGGATGGCCTCTATACAAAGCTATCGCCGAAGGAGGGGTTTGCGTCTGATTAGCTGGTTGGAGGGGTAACGGCCCAACAAGGCGATGATCAGTAGCCGGTCTGAGAGGATGAACGGCCACATTGGGACTGAGACACGGCCCAGACTCCTACGGGAGGCAGCA	D_0__Bacteria;D_1__Firmicutes;D_2__Negativicutes;D_3__Selenomonadales;D_4__Veillonellaceae;D_5__Megasphaera;D_6__uncultured Dialister sp.	0	0	0	0	0	0	0	0	0	0	0	0	0	0	0	0	0	0	0	0	0	0	0	0	0	0	0	0	0	0	0	0	0	0	0	0	0	0	0	0	0	0	0	0
d37410d00427cf775f79140a60f91c65	Veillonellaceae bacterium	96.4865	99.7199	AGGGTTTGATTATGGCTCAGGACGAACGCTGGCGGCGTGCTTAACACATGCAAGTCGAACGAGAGGACATGGGAAGCTTGCTTCCTATGAAATCGAGTGGCAAACGGGTGAGTAACGCGTAAACAACCTGCCCTTCGGATGGGGATAACAGCCGGAAACGGCTGCTAATACCGAATACGATCTTTTCGTCGCATGACGAAAAGAAGAAAGGATGGCCTCTATACAAAGCTATCGCCGAAGGAGGGGTTTGCGTCTGATTAGCTGGTTGGAGGGGTAACGGCCCAACAAGGCGATGATCAGTAGCCGGTCTGAGAGGATGAACGGCCACATTGGGACTGAGACACGGCCCAGACTCCTACGGGAGGCAGCA	D_0__Bacteria;D_1__Firmicutes;D_2__Negativicutes;D_3__Selenomonadales;D_4__Veillonellaceae;D_5__Megasphaera;D_6__uncultured Dialister sp.	0	0	0	0	0	0	0	0	0	0	0	0	0	0	0	0	0	0	0	0	0	0	0	0	0	0	0	0	0	0	0	0	0	0.358574	0	0	0	0	0	0	0	0	0	0
09b4b0c63b7a91bf81f1c239f6ef9540	Actinomyces cf. urogenitalis			AGGGTTTGATTATGGCTCAGGACGAACGCTGGCGGCGTGCTTAACACATGCAAGTCGAACGGTGAAGCTCCAGCTTGCTGGGGTGGATGAGTGGCGAACGGGTGAGTAACACGTGAGTAACCTGCCCCCTTCTTCTGGATAACTGCTTGAAAGGGTAGCTAATACGGGATATTCTGGCCTGCTCGCATGGGTGGGTTTGGAAAGGTTTTTTCTGGTGGGGGATGGGCTCGCGGCCTATCAGCTTGTTGGTGGGGTGATGGCCTACCAAGGCGGTGACGGGTAGCCGGCCTGAGAGGGTGGACGGCCACACTGGGACTGAGACACGGCCCAGACTCCTACGGGAGGCAGCA	D_0__Bacteria;D_1__Actinobacteria;D_2__Actinobacteria;D_3__Actinomycetales;D_4__Actinomycetaceae;D_5__Actinomyces;D_6__Actinomyces cf. urogenitalis M560/98/1	0	0	0	0	0	0	0	0	0	0	0	0	0	0	0	0	0	0	0	0	0	0	0	0	0	0	0	0	0	0	0	0	0	0	0	0	0	0	0	0	0	0	0	0
42fe5153ed6dd6dbdad8fc4c2862ceaa	Actinomyces cf. urogenitalis			AGAGTTTGATTATGGCTCAGGACGAACGCTGGCGGCGTGCTTAACACATGCAAGTCGAACGGTGAAGCTCCAGCTTGCTGGGGTGGATGAGTGGCGAACGGGTGAGTAACACGTGAGTAACCTGCCCCCTTCTTCTGGATAACTGCTTGAAAGGGTAGCTAATACGGGATATTCTGGCCTGCTCGCATGGGTGGGTTTGGAAAGGTTTTTTCTGGTGGGGGATGGGCTCGCGGCCTATCAGCTTGTTGGTGGGGTGATGGCCTACCAAGGCGGTGACGGGTAGCCGGCCTGAGAGGGTGGACGGCCACACTGGGACTGAGACACGGCCCAGACTCCTACGGGAGGCAGCA	D_0__Bacteria;D_1__Actinobacteria;D_2__Actinobacteria;D_3__Actinomycetales;D_4__Actinomycetaceae;D_5__Actinomyces;D_6__Actinomyces cf. urogenitalis M560/98/1	0	0	0	0	0	0	0	0	0	0	0	0	0	0.0177326	0	0	0	0	0	0	0	0	0	0	0	0	0	0	0	0	0	0	0	0	0	0	0	0	0	0	0	0	0	0
145c83d7d0d3be990783c0d32f47a5e8	Actinomyces europaeus			AGGGTTTGATTATGGCTCAGGACGAACGCTGGCGGCGTGCTTAACACATGCAAGTCGAACGGGATCCAAGGCGCTTTTTGTGTTTTGGTGAGAGTGGCGAACGGGTGAGTAACACGTGAGTAACCTGCCCCCTTCTTTTGGATAACCGCATGAAAGTGTGGCTAATACAGGATATTCCAGGCTGGTCGCATGATTGGTTTGGGAAATGGTTTGGTCTGGTGGGGGATGGGCTCGCGGCCTATCAGCTTGTTGGTGGGGTGATGGCCTACCAAGGCGGTGACGGGTAGCCGGCCTGAGAGGGTGGGCGGTCACACTGGGACTGAGATACGGCCCAGACTCCTACGGGAGGCAGCA	D_0__Bacteria;D_1__Actinobacteria;D_2__Actinobacteria;D_3__Actinomycetales;D_4__Actinomycetaceae;D_5__Actinomyces;D_6__Actinomyces europaeus	0	0	0	0	0	0	0	0	0	0	0	0	0	0	0	0	0	0	0	0	0	0	0	0	0	0	0	0	0	0	0	0	0	0	0	0	0	0	0	0	0	0	0.0828791	0
3b3836476f964f557ac60e02014ee5f6	Actinomyces europaeus			AGGGTTTGATCATGGCTCAGGACGAACGCTGGCGGCGTGCTTAACACATGCAAGTCGAACGGGATCCAAGGGCTTTTTGTTTTTGGTGAGAGTGGCGAACGGGTGAGTAACACGTGAGTAACCTGCCCCCTTCTTTTGGATAACCGCATGAAAGTGTGGCTAATACAGGATAATCCAGGCTGGTCGCATGATTGGTTTGGGAAATGGTTTGGTCTGGTGGGGGATGGGCTCGCGGCCTATCAGCTTGTTGGTGGGGTGATGGCCTACCAAGGCGGTGACGGGTAGCCGGCCTGAGAGGGTGGGCGGTCACACTGGGACTGAGATACGGCCCAGACTCCTACGGGAGGCAGCA	D_0__Bacteria;D_1__Actinobacteria;D_2__Actinobacteria;D_3__Actinomycetales;D_4__Actinomycetaceae;D_5__Actinomyces;D_6__Actinomyces europaeus	0	0	0	0	0	0	0	0	0	0	0	0	0	0	0	0	0	0	0.0337236	0	0	0	0	0	0	0	0	0	0	0	0	0	0	0	0	0	0	0	0	0	0	0	0	0
3c1c00e678d38150ad8778de39f79040	Actinomyces europaeus			AGGGTTTGATCATGGCTCAGGACGAACGCTGGCGGCGTGCTTAACACATGCAAGTCGAACGGGATCCAAGGCGCTTTTTTGTGTTTTGGTGAGAGTGGCGAACGGGTGAGTAACACGTGAGTAACCTGCCCCCTTCTTTTGGATAACCGCATGAAAGTGTGGCTAATACAGGATATTCCAGGCTGGTCGCATGATTGGTTTGGGAAATGGTTTGGTCTGGTGGGGGATGGGCTCGCGGCCTATCAGCTTGTTGGTGGGGTGATGGCCTACCAAGGCGGTGACGGGTAGCCGGCCTGAGAGGGTGGGCGGTCACACTGGGACTGAGATACGGCCCAGACTCCTACGGGAGGCAGCA	D_0__Bacteria;D_1__Actinobacteria;D_2__Actinobacteria;D_3__Actinomycetales;D_4__Actinomycetaceae;D_5__Actinomyces;D_6__Actinomyces europaeus	0	0	0	0.0222025	0	0	0	0	0	0	0	0	0	0	0	0	0	0	0	0	0	0	0	0	0	0	0	0	0	0	0	0	0	0	0	0	0	0	0	0	0	0	0	0
795a68b4fa1bee89ed6664ecdbf5037c	Actinomyces europaeus			AGAGTTTGATTATGGCTCAGGACGAACGCTGGCGGCGTGCTTAACACATGCAAGTCGAACGGGATCCAAAGGCTTTTTGTTTTTGGTGAGAGTGGCGAACGGGTGAGTAACACGTGAGTAACCTGCCCCCTTCTTTTGGATAACCGCATGAAAGTGTGGCTAATACAGGATATTCCAGGCTGGTCGCATGATTGGTTTGGGAAATGGTTTGGTCTGGTGGGGGATGGGCTCGCGGCCTATCAGCTTGTTGGTGGGGTGATGGCCTACCAAGGCGGTGACGGGTAGCCGGCCTGAGAGGGTGGGCGGTCACACTGGGACTGAGATACGGCCCAGACTCCTACGGGAGGCAGCA	D_0__Bacteria;D_1__Actinobacteria;D_2__Actinobacteria;D_3__Actinomycetales;D_4__Actinomycetaceae;D_5__Actinomyces;D_6__Actinomyces europaeus	0	0	0	0	0	0	0	0	0	0	0	0	0	0	0	0	0	0	0	0	0.254623	0	0	0	0	0	0	0	0	0	0	0	0	0	0	0	0	0	0	0	0	0	0	0
8b83d2e3db5cacebc331095e8254dbd8	Actinomyces europaeus			AGGGTTTGATTATGGCTCAGGACGAACGCTGGCGGCGTGCTTAACACATGCAAGTCGAACGGGATCCAAAGGCTTTTTGTTTTTGGTGAGAGTGGCGAACGGGTGAGTAACACGTGAGTAACCTGCCCCCTTCTTTTGGATAACCGCATGAAAGTGTGGCTAATACAGGATATTCCAGGCTGGTCGCATGATTGGTTTGGGAAATGGTTTGGTCTGGTGGGGGATGGGCTCGCGGCCTATCAGCTTGTTGGTGGGGTGATGGCCTACCAAGGCGGTGACGGGTAGCCGGCCTGAGAGGGTGGGCGGTCACACTGGGACTGAGATACGGCCCAGACTCCTACGGGAGGCAGCA	D_0__Bacteria;D_1__Actinobacteria;D_2__Actinobacteria;D_3__Actinomycetales;D_4__Actinomycetaceae;D_5__Actinomyces;D_6__Actinomyces europaeus	0	0.060307	0	0	0	0	0	0	0	0	0	0	0	0	0	0	0	0	0	0	0	0	0	0	0	0	0	0	0	0	0	0	0	0	0	0	0	0	0	0	0	0	0	0
93017882ae1a19393a131f9878f2a556	Actinomyces europaeus			AGAGTTTGATCATGGCTCAGGACGAACGCTGGCGGCGTGCTTAACACATGCAAGTCGAACGGGATCCAAAGGCTTTTTGTTTTTGGTGAGAGTGGCGAACGGGTGAGTAACACGTGAGTAACCTGCCCCCTTCTTTTGGATAACCGCATGAAAGTGTGGCTAATACAGGATATTCCAGGCTGGTCGCATGATTGGTTTGGGAAATGGTTTGGTCTGGTGGGGGATGGGCTCGCGGCCTATCAGCTTGTTGGTGGGGTGATGGCCTACCAAGGCGGTGACGGGTAGCCGGCCTGAGAGGGTGGGCGGTCACACTGGGACTGAGATACGGCCCAGACTCCTACGGGAGGCAGCA	D_0__Bacteria;D_1__Actinobacteria;D_2__Actinobacteria;D_3__Actinomycetales;D_4__Actinomycetaceae;D_5__Actinomyces;D_6__Actinomyces europaeus	0	0	0	0	0	0	0	0	0	0	0	0	0	0	0	0	0	0	0	0	0	0	0	0	0	0	0	0	0	0	0	0	0	0	0	0	0	0	0	0	0	0	0	0
5c26b5fdd2ded9c9226ac4306dff77e0	Actinomyces graevenitzii			AGAGTTTGATCATGGCTCAGGACGAACGCTGGCGGCGTGCTTAACACATGCAAGTCGAACGAAAATACCAAGCTTGCTTGGTTGATTAGTGGCGAACGGGTGAGTAACACGTGAGTAACCTGCCCCTTACTTTCCTGGATAACTGCTCGAAAGGGTAGCTAATACGGGATATTCTGACCAGCCCGCATGGGTTGGTTTGGAAAGGTTTTTTTCTGGTAAGGGATGGGCTCGCGGCCTATCAGCTTGTTGGTGGGGTGATGGCCTACCAAGGCTTTGACGGGTAGCCGGCCTGAGAGGGTGGACGGTCACACTGGGACTGAGATACGGCCCAGACTCCTACGGGAGGCAGCA	D_0__Bacteria;D_1__Actinobacteria;D_2__Actinobacteria;D_3__Actinomycetales;D_4__Actinomycetaceae;D_5__Actinomyces;D_6__Actinomyces graevenitzii F0530	0	0	0	0	0	0	0	0	0	0	0	0	0	0	0	0	0	0	0	0	0	0	0	0	0	0	0	0	0	0	0	0	0	0	0	0	0	0	0.11227	0	0	0	0	0
dfb6ebdb5f18ddd6c2215a6578d1a55f	Actinomyces graevenitzii			AGAGTTTGATCATGGCTCAGGACGAACGCTGGCGGCGTGCTTAACACATGCAAGTCGAACGAAAATACCAAGCTTGCTTGGTTGATTAGTGGCGAACGGGTGAGTAACACGTGAGTAACCTGCCCCTTACTTTCCTGGATAACTGCTCGAAAGGGTAGCTAATACGGGATATTCTGACCATCCTGCATGGGTTGGTTTGGAAAGGTTATTTTTTTCTGGTAAGGGATGGGCTCGCGGCCTATCAGCTTGTTGGTGGGGTGATGGCCTACCAAGGCTTTGACGGGTAGCCGGCCTGAGAGGGTGGACGGTCACACTGGGACTGAGATACGGCCCAGACTCCTACGGGAGGCAGCA	D_0__Bacteria;D_1__Actinobacteria;D_2__Actinobacteria;D_3__Actinomycetales;D_4__Actinomycetaceae;D_5__Actinomyces;D_6__Actinomyces graevenitzii F0530	0	0	0	0	0	0	0	0	0	0	0	0	0	0	0	0	0	0	0	0	0	0.0508066	0	0	0	0	0	0	0	0	0	0	0	0	0	0	0	0	0	0	0	0	0	0
c69f6ae938bc2f54026cf7860dd99795	Actinomyces hongkongensis			AGGGTTTGATTATGGCTCAGGACGAACGCTGGCGGCGTGCTTAACACATGCAAGTCGAACGATGAAGCGGGGACTTTTTGTTTTCGTGGATTAGTGGCGAACGGGTGAGTAACACGTGAGTAACCTGCCCCCTTCTTTGGGATAACTGTCGGAAACGGTGGCTAATACTGGATATTCAGGTCGCACCGCATGGTGTGGTTTGGAAAGGTTTTTTCTGGTGGGGGATGGGCTCGCGGCCTATCAGCTTGTTGGTGGGGTGATGGCCTACCAAGGCTTTGACGGGTAACCGGCCTGAGAGGGTGACCGGTCACACTGGGACTGAGATACGGCCCAGACTCCTACGGGAGGCAGCA	D_0__Bacteria;D_1__Actinobacteria;D_2__Actinobacteria;D_3__Actinomycetales;D_4__Actinomycetaceae;D_5__Actinomyces;D_6__Actinomyces hongkongensis	0	0	0	0	0	0	0	0	0	0	0	0	0	0	0	0	0	0	0	0	0	0	0	0	0	0	0	0	0	0	0	0	0	0	0	0	0	0	0	0	0	0	0	0
13e8fcb10e89ebae52fec4af4c229afa	Actinomyces ihumii			AGGGTTTGATCATGGCTCAGGACGAACGCTGGCGGCGTGCTTAACACATGCAAGTCGAACGGGATCTGCGTGGCCTTTGTGGTTGTGTGGTGAGAGTGGCGAACGGGTGAGTAACACGTGAGTAACCTGCCTTTTTCTTTGGGATAACGCTCAGAAATGGGTGCTAATACTGGATGTTCTGCGCTTTCCGCATGGGGGGTGTGGGAAAGGGGCCTTTGTGGTTTCTGGAGGGAGATGGGCTCGCGGCTTATCAGCTTGTTGGTGGGGTGATGGCTTACCAAGGCTTTGACGGGTAGCCGGCCTGAGAGGGTGGGCGGTCACATTGGGACTGAGATACGGCCCAGACTCCTACGGGAGGCAGCA	D_0__Bacteria;D_1__Actinobacteria;D_2__Actinobacteria;D_3__Actinomycetales;D_4__Actinomycetaceae;D_5__Actinomyces;D_6__Actinomyces ihumii	0	0	0	0	0	0.104995	0	0	0	0	0	0	0	0.112306	0	0	0	0	0	0	0	0	0	0	0	0	0	0	0	0	0	0	0	0	0	0	0	0	0	0	0	0	0	0
21a734184fe858b4126d5e465dbe494d	Actinomyces ihumii			AGAGTTTGATTCTGGCTCAGGACGAACGCTGGCGGCGTGCTTAACACATGCAAGTCGAACGGGATCTGCGTGGCCTTTGTGGTTGTGTGGTGAGAGTGGCGAACGGGTGAGTAACACGTGAGTAACCTGCCTTTTTCTTTGGGATAACGCTCAGAAATGGGTGCTAATACTGGATGTTCTGCGCTTTCCGCATGGGGGGTGTGGGAAAGGGGCCTTTGTGGTTTCTGGAGGGAGATGGGCTCGCGGCTTATCAGCTTGTTGGTGGGGTGATGGCTTACCAAGGCTTTGACGGGTAGCCGGCCTGAGAGGGTGGGCGGTCACATTGGGACTGAGATACGGCCCAGACTCCTACGGGAGGCAGCA	D_0__Bacteria;D_1__Actinobacteria;D_2__Actinobacteria;D_3__Actinomycetales;D_4__Actinomycetaceae;D_5__Actinomyces;D_6__Actinomyces ihumii	0	0	0	0	0	0	0	0	0	0	0	0	0	0	0	0	0	0	0	0	0	0	0	0	0.06838	0	0	0	0	0	0	0	0	0	0	0	0	0	0	0	0	0	0	0
21e4fcd037a8cd1ed130d24cfec625e9	Actinomyces ihumii			AGGGTTTGATTATGGCTCAGGACGAACGCTGGCGGCGTGCTTAACACATGCAAGTCGAACGGGATCTGCGTGGCCTTTGTGGTTGTGTGGTGAGAGTGGCGAACGGGTGAGTAACACGTGAGTAACCTGCCTTTTTCTTTGGGATAACGCTCAGAAATGGGTGCTAATACTGGATGTTCTGCGCTTTCCGCATGGGGGGTGTGGGAAAGGGGCCTTTGTGGTTTCTGGAGGGAGATGGGCTCGCGGCTTATCAGCTTGTTGGTGGGGTGATGGCTTACCAAGGCTTTGACGGGTAGCCGGCCTGAGAGGGTGGGCGGTCACATTGGGACTGAGATACGGCCCAGACTCCTACGGGAGGCAGCA	D_0__Bacteria;D_1__Actinobacteria;D_2__Actinobacteria;D_3__Actinomycetales;D_4__Actinomycetaceae;D_5__Actinomyces;D_6__Actinomyces ihumii	0	0	0	0	0	0	0.215858	0	0	0.376276	0	0	0	0	0	0	0	0	0.154165	0	0	0	0	0.0522534	0	0.138169	0	0	0	0	0	0	0	0	0	0	0	0	0	0	0	0	0	0
87036444418835d88bb91186df8379f2	Actinomyces ihumii			AGAGTTTGATTATGGCTCAGGACGAACGCTGGCGGCGTGCTTAACACATGCAAGTCGAACGGGATCTGCGTGGCCTTTGTGGTTGTGTGGTGAGAGTGGCGAACGGGTGAGTAACACGTGAGTAACCTGCCTTTTTCTTTGGGATAACGCTCAGAAATGGGTGCTAATACTGGATGTTCTGCGCTTTCCGCATGGGGGGTGTGGGAAAGGGGCTTTTTAAGTTTCTGGAGGGAGATGGGCTCGCGGCTTATCAGCTTGTTGGTGGGGTGATGGCTTACCAAGGCTTTGACGGGTAGCCGGCCTGAGAGGGTGGGCGGTCACATTGGGACTGAGATACGGCCCAGACTCCTACGGGAGGCAGCA	D_0__Bacteria;D_1__Actinobacteria;D_2__Actinobacteria;D_3__Actinomycetales;D_4__Actinomycetaceae;D_5__Actinomyces;D_6__Actinomyces ihumii	0	0	0	0	0	0	0	0	0	0	0	0	0	0	0	0	0	0	0	0	0	0	0	0	0	0	0	0	0	0	0	0	0	0	0	0	0	0	0	0	0	0	0.0286889	0
881e14afd60acd8bbd9fb63857cef5f7	Actinomyces ihumii			AGGGTTTGATGATGGCTCAGGACGAACGCTGGCGGCGTGCTTAACACATGCAAGTCGAACGGGATCTGCGTGGCCTTTGTGGTTGTGTGGTGAGAGTGGCGAACGGGTGAGTAACACGTGAGTAACCTGCCTTTTTCTTTGGGATAACGCTCAGAAATGGGTGCTAATACTGGATGTTCTGCGCTTTCCGCATGGGGGGTGTGGGAAAGGGGCCTTTGTGGTTTCTGGAGGGAGATGGGCTCGCGGCTTATCAGCTTGTTGGTGGGGTGATGGCTTACCAAGGCTTTGACGGGTAGCCGGCCTGAGAGGGTGGGCGGTCACATTGGGACTGAGATACGGCCCAGACTCCTACGGGAGGCAGCA	D_0__Bacteria;D_1__Actinobacteria;D_2__Actinobacteria;D_3__Actinomycetales;D_4__Actinomycetaceae;D_5__Actinomyces;D_6__Actinomyces ihumii	0	0	0	0	0	0	0	0	0	0	0	0.0181225	0	0	0	0	0	0	0	0	0	0	0	0	0	0	0	0	0	0	0	0	0	0	0	0	0	0	0	0	0	0	0	0
b0da3d8ff2c5e04bbd337c59add2d8c0	Actinomyces ihumii			AGGGTTTGATTATGGCTCAGGACGAACGCTGGCGGCGTGCTTAACACATGCAAGTCGAACGGGATCTGCGTGGCCTTTGTGGTTGTGTGGTGAGAGTGGCGAACGGGTGAGTAACACGTGAGTAACCTGCCTTTTTCTTTGGGATAACGCTCAGAAATGGGTGCTAATACTGGATGTTCTGCGCTTTCCGCATGGGGGGTGTGGGAAAGGGGCTTTTTAAGTTTCTGGAGGGAGATGGGCTCGCGGCTTATCAGCTTGTTGGTGGGGTGATGGCTTACCAAGGCTTTGACGGGTAGCCGGCCTGAGAGGGTGGGCGGTCACATTGGGACTGAGATACGGCCCAGACTCCTACGGGAGGCAGCA	D_0__Bacteria;D_1__Actinobacteria;D_2__Actinobacteria;D_3__Actinomycetales;D_4__Actinomycetaceae;D_5__Actinomyces;D_6__Actinomyces ihumii	0	0	0.154981	0	0	0	0	0	0	0	0	0	0	0	0	0	0	0	0	0	0	0	0.18314	0	0	0	0	0	0	0	0.0396563	0	0	0	0	0	0	0	0	0	0	0	0	0
c3d5684ce7a12481bb6c25136d12f362	Actinomyces ihumii			AGAGTTTGATCATGGCTCAGGACGAACGCTGGCGGCGTGCTTAACACATGCAAGTCGAACGGGATCTGCGTGGCCTTTGTGGTTGTGTGGTGAGAGTGGCGAACGGGTGAGTAACACGTGAGTAACCTGCCTTTTTCTTTGGGATAACGCTCAGAAATGGGTGCTAATACTGGATGTTCTGCGCTTTCCGCATGGGGGGTGTGGGAAAGGGGCTTTTTAAGTTTCTGGAGGGAGATGGGCTCGCGGCTTATCAGCTTGTTGGTGGGGTGATGGCTTACCAAGGCTTTGACGGGTAGCCGGCCTGAGAGGGTGGGCGGTCACATTGGGACTGAGATACGGCCCAGACTCCTACGGGAGGCAGCA	D_0__Bacteria;D_1__Actinobacteria;D_2__Actinobacteria;D_3__Actinomycetales;D_4__Actinomycetaceae;D_5__Actinomyces;D_6__Actinomyces ihumii	0	0	0	0	0	0	0	0	0	0	0	0	0	0	0	0	0	0	0	0	0	0	0	0	0	0	0	0	0	0	0	0	0	0	0	0	0	0	0	0	0	0	0	0
d0abe96494e3bbedb255e2df4616270d	Actinomyces ihumii			AGAGTTTGATTATGGCTCAGGACGAACGCTGGCGGCGTGCTTAACACATGCAAGTCGAACGGGATCTGCGTGGCCTTTGTGGTTGTGTGGTGAGAGTGGCGAACGGGTGAGTAACACGTGAGTAACCTGCCTTTTTCTTTGGGATAACGCTCAGAAATGGGTGCTAATACTGGATGTTCTGCGCTTTCCGCATGGGGGGTGTGGGAAAGGGGCCTTTGTGGTTTCTGGAGGGAGATGGGCTCGCGGCTTATCAGCTTGTTGGTGGGGTGATGGCTTACCAAGGCTTTGACGGGTAGCCGGCCTGAGAGGGTGGGCGGTCACATTGGGACTGAGATACGGCCCAGACTCCTACGGGAGGCAGCA	D_0__Bacteria;D_1__Actinobacteria;D_2__Actinobacteria;D_3__Actinomycetales;D_4__Actinomycetaceae;D_5__Actinomyces;D_6__Actinomyces ihumii	0.056346	0	0	0	0	0	0	0	0	0	0	0	0	0	0.257264	0	0	0	0	0	0	0	0	0	0	0	0	0	0	0	0	0	0.0543592	0	0	0	0.0294387	0	0	0.27955	0.200499	0	0	0
e0b26e646b4a8b2c0f561e6697e0594d	Actinomyces ihumii			AGGGTTTGATCATGGCTCAGGACGAACGCTGGCGGCGTGCTTAACACATGCAAGTCGAACGGGATCTGCGTGGCCTTTGTGGTTGTGTGGTGAGAGTGGCGAACGGGTGAGTAACACGTGAGTAACCTGCCTTTTTCTTTGGGATAACGCTCAGAAATGGGTGCTAATACTGGATGTTCTGCGCTTTCCGCATGGGGGGTGTGGGAAAGGGGCTTTTTAAGTTTCTGGAGGGAGATGGGCTCGCGGCTTATCAGCTTGTTGGTGGGGTGATGGCTTACCAAGGCTTTGACGGGTAGCCGGCCTGAGAGGGTGGGCGGTCACATTGGGACTGAGATACGGCCCAGACTCCTACGGGAGGCAGCA	D_0__Bacteria;D_1__Actinobacteria;D_2__Actinobacteria;D_3__Actinomycetales;D_4__Actinomycetaceae;D_5__Actinomyces;D_6__Actinomyces ihumii	0	0	0	0	0	0	0	0	0	0	0	0	0	0	0	0	0	0	0	0	0	0	0	0	0	0	0	0	0	0	0	0	0	0	0	0	0	0	0	0	0	0	0	0
2d6126a73b6dcde58a06f90ae1c56662	Actinomyces neuii			AGGGTTTGATTATGGCTCAGGACGAACGCTGACGGCGTGCTTAACACATGCAAGTCGAACGGGATCCATTAGCGCTTTTGTGTTTTTGGTGAGAGTGGCGAACGGGTGAGTAACACGTGAGTAACCTGCCCTTTTCTTTGGGATAAGCCTGGGAAACTGGGTCTAATACTGGATGTTCCGGCTTCCTCGCATGGGGTTGTTGGGAAAGGTTTTTTCTGGATTGGGATGGGCTCGCGGCTTATCAGCTTGTTGGTGGGGTGATGGCTTACCAAGGCTTTGACGGGTAGCCGGCCTGAGAGGGTGGTCGGGCACACTGGGACTGAGATACGGCCCAGACTCCTACGGGAGGCAGCA	D_0__Bacteria;D_1__Actinobacteria;D_2__Actinobacteria;D_3__Actinomycetales;D_4__Actinomycetaceae;D_5__Actinomyces;D_6__Actinomyces neuii BVS029A5	0	0	0	0	0	0	0	0	0	0	0	0	0	0	0	0	0	0	0	0	0	0	0	0	0	0	0	0	0	0	0	0	0	0	0	0.366898	0	0	0	0	0	0	0	0
5acbdb8bba08c1880b1bd235acdd1389	Actinomyces neuii			AGGGTTTGATTATGGCTCAGGACGAACGCTGACGGCGTGCTTAACACATGCAAGTCGAACGGGATCCATTAGCGCTTTTGTGTTTTTGGTGAGAGTGGCGAACGGGTGAGTAACACGTGAGTAACCTGCCCTTTTCTTTGGGATAAGCCTGGGAAACTGGGTCTAATACTGGATGTTCCGGCTTCCTCGCATGGGGTTGTTGGGAAAGGTTTTTTCTGGATTGGGATGGGCTCGCGGCTTATCAGCTTGTTGGTGGGGTGATGGCTTACCAAGGCTTTGACGGGTAGCCGGCCTGAGAGGGTGGTCGGTCACACTGGGACTGAGATACGGCCCAGACTCCTACGGGAGGCAGCA	D_0__Bacteria;D_1__Actinobacteria;D_2__Actinobacteria;D_3__Actinomycetales;D_4__Actinomycetaceae;D_5__Actinomyces;D_6__Actinomyces neuii BVS029A5	0	0.0383772	0.322361	0	0	0	0	0	0	0.586735	0.838748	0.283919	0.581232	0	0.171509	0.0745573	0	0	0	0.0994152	0	0	0	0	0	0.2566	0	0.0216403	0.77898	0	0	0.433338	0	0.133586	0	6.20555	0.228968	1.17476	0	3.26141	0	0.423198	0	0
636505f91a05e291c28ac5103d4bedb3	Actinomyces neuii			AGAGTTTGATTATGGCTCAGGACGAACGCTGACGGCGTGCTTAACACATGCAAGTCGAACGGGATCCATTAGCGCTTTTGTGTTTTTGGTGAGAGTGGCGAACGGGTGAGTAACACGTGAGTAACCTGCCCTTTTCTTTGGGATAAGCCTGGGAAACTGGGTCTAATACTGGATGTTCCGGCTTCCTCGCATGGGGTTGTTGGGAAAAGTTTTTTCTGGATTGGGATGGGCTCGCGGCTTATCAGCTTGTTGGTGGGGTGATGGCTTACCAAGGCTTTGACGGGTAGCCGGCCTGAGAGGGTGGTCGGTCACACTGGGACTGAGATACGGCCCAGACTCCTACGGGAGGCAGCA	D_0__Bacteria;D_1__Actinobacteria;D_2__Actinobacteria;D_3__Actinomycetales;D_4__Actinomycetaceae;D_5__Actinomyces;D_6__Actinomyces neuii BVS029A5	0	0	0	0	0	0	0	0	0	0	0	0	0	0	0	0	0	0	0	0	0	0	0	0	0	0	0	0	0	0	0	0	0	0	0	0	0	0	0	0	0	0.125289	0	0
8b0a4c11b574ccd9640da9074011bf83	Actinomyces neuii			AGGGTTTGATCATGGCTCAGGACGAACGCTGACGGCGTGCTTAACACATGCAAGTCGAACGGGATCCATTAGCGCTTTTGTGTTTTTGGTGAGAGTGGCGAACGGGTGAGTAACACGTGAGTAACCTGCCCTTTTCTTTGGGATAAGCCTGGGAAACTGGGTCTAATACTGGATGTTCCGGCTTCCTCGCATGGGGTTGTTGGGAAAGGTTTTTTCTGGATTGGGATGGGCTCGCGGCTTATCAGCTTGTTGGTGGGGTGATGGCTTACCAAGGCTTTGACGGGTAGCCGGCCTGAGAGGGTGGTCGGTCACACTGGGACTGAGATACGGCCCAGACTCCTACGGGAGGCAGCA	D_0__Bacteria;D_1__Actinobacteria;D_2__Actinobacteria;D_3__Actinomycetales;D_4__Actinomycetaceae;D_5__Actinomyces;D_6__Actinomyces neuii BVS029A5	0	0	0.229372	0	0	0	0	0.0918274	0	0.210459	0.419374	0	0	0	0.141243	0	0	0	0	0	0	0	0	0	0.10257	0	0.0963804	0	0.471599	0	0.118969	0	0	0	0	4.19441	0.13411	0.78425	0	2.30091	0	0.272851	0	0
8cab4ebf30cf217d2b9815030058cf26	Actinomyces neuii			AGAGTTTGATTATGGCTCAGGACGAACGCTGACGGCGTGCTTAACACATGCAAGTCGAACGGGATCCATTAGCGCTTTTGTGTTTTTGGTGAGAGTGGCGAACGGGTGAGTAACACGTGAGTAACCTGCCCTTTTCTTTGGGATAAGCCTGGGAAACTGGGTCTAATACTGGATGTTCCGGCTTCCTCGCATGGGGTTGTTGGGAAAGGTTTTTTCTGGATTGGGATGGGCTCGCGGCTTATCAGCTTGTTGGTGGGGTGATGGCTTACCAAGGCTTTGACGGGTAGCCGGCCTGAGAGGGTGGTCGGTCACACTGGGACTGAGATACGGCCCAGACTCCTACGGGAGGCAGCA	D_0__Bacteria;D_1__Actinobacteria;D_2__Actinobacteria;D_3__Actinomycetales;D_4__Actinomycetaceae;D_5__Actinomyces;D_6__Actinomyces neuii BVS029A5	0	0	0.24797	0	0	0	0	0	0.207822	0.325255	0.667454	0	0	0.200969	0.282486	0	0.0228506	0.0359432	0	0	0	0	0	0	0	0	0.310559	0	0.560024	0	0.304032	0.223891	0	0	0	4.68814	0.140652	0.9198	0	1.89951	0.0914559	0.381435	0	0.154219
92fc68b6adb5beb58bc5a6aa55a5381d	Actinomyces neuii			AGAGTTTGATTATGGCTCAGGACGAACGCTGACGGCGTGCTTAACACATGCAAGTCGAACGGGATCCATTATCGCTTTTGTGTTTTTGGTGAGAGTGGCGAACGGGTGAGTAACACGTGAGTAACCTGCCCTTTTCTTTGGGATAAGCCTGGGAAACTGGGTCTAATACTGGATGTTCCGGCTTCCTCGCATGGGGTTGTTGGGAAAGGTTTTTTCTGGATTGGGATGGGCTCGCGGCTTATCAGCTTGTTGGTGGGGTGATGGCTTACCAAGGCTTTGACGGGTAGCCGGCCTGAGAGGGTGGTCGGTCACACTGGGACTGAGATACGGCCCAGACTCCTACGGGAGGCAGCA	D_0__Bacteria;D_1__Actinobacteria;D_2__Actinobacteria;D_3__Actinomycetales;D_4__Actinomycetaceae;D_5__Actinomyces;D_6__Actinomyces neuii BVS029A5	0	0	0	0	0	0	0	0	0	0	0	0	0	0	0	0	0	0	0	0	0	0	0	0	0	0	0	0	0	0	0	0	0	0	0	0	0	0	0	0	0	0	0	0
9a386aa5b713ea0f1f3c377d16dadb92	Actinomyces neuii			AGGGTTTGATTATGGCTCAGGACGAACGCTGCCGGCGTGCTTAACACATGCAAGTCGAACGGGATCCATTAGCGCTTTTGTGTTTTTGGTGAGAGTGGCGAACGGGTGAGTAACACGTGAGTAACCTGCCCTTTTCTTTGGGATAAGCCTGGGAAACTGGGTCTAATACTGGATGTTCCGGCTTCCTCGCATGGGGTTGTTGGGAAAGGTTTTTTCTGGATTGGGATGGGCTCGCGGCTTATCAGCTTGTTGGTGGGGTGATGGCTTACCAAGGCTTTGACGGGTAGCCGGCCTGAGAGGGTGGTCGGTCACACTGGGACTGAGATACGGCCCAGACTCCTACGGGAGGCAGCA	D_0__Bacteria;D_1__Actinobacteria;D_2__Actinobacteria;D_3__Actinomycetales;D_4__Actinomycetaceae;D_5__Actinomyces;D_6__Actinomyces neuii BVS029A5	0	0	0	0	0	0	0	0	0	0	0	0	0	0	0	0	0	0	0	0	0	0	0	0	0	0	0	0	0	0	0	0	0	0	0	0.955746	0	0.171051	0	0	0	0	0	0
a242fae9e5997ff7eb8fe955dc16d618	Actinomyces neuii			AGGGTTTGATTATGGCTCAGGACGAACGCTGACGGCGTGCTTAACACATGCAAGTCGAACGGGATCCATTAGCGCTTTTGTGTTTTTGGTGAGAGTGGCGAACGGGTGAGTAACACGTGAGTAACCTGCCCTTTTCTTTGGGATAAGCCTGGGAAACTGGGTCTAATACTGGATGTTCCGGCTTCCTCGCATGGGGTTGTTGGGAAAGGTTTTTTCTGGATTGGGATGGGCTCGCGGCTTATCAGCTTGTTGGTGGGGTGATGGCTTACCAAGGCTTTGACGGGTAGCCGGCCTGAGAGGGTGGCCGGTCACACTGGGACTGAGATACGGCCCAGACTCCTACGGGAGGCAGCA	D_0__Bacteria;D_1__Actinobacteria;D_2__Actinobacteria;D_3__Actinomycetales;D_4__Actinomycetaceae;D_5__Actinomyces;D_6__Actinomyces neuii BVS029A5	0	0	0	0	0	0	0	0	0	0	0	0.120817	0	0	0	0	0	0	0	0	0	0	0	0	0	0	0	0	0	0	0	0	0	0	0	0	0	0	0	0	0	0	0	0
5179427fc6bfa8500dc85021e90d2d5c	Actinomyces odontolyticus	99.7159	98.5755	AGAGTTTGATCATGGCTCAGGACGAACGCTGGCGGCGTGCTTAACACATGCAAGTCGAACGCTGAAGACCTGGCTTTTGTTGGGTTGGATGAGTGGCGAACGGGTGAGTAACACGTGAGTAACCTGCCCTCTTCTTTGGGATAACGCCCGGAAACGGGTGCTAATACTGGATATTCACTGATCTTCGCATGGGGGTTGGTGGAAAGGTTTTTTCTGGTGGGGGATGGGCTCGCGGCCTATCAGCTTGTTGGTGGGGTGATGGCCTACCAAGGCTTTGACGGGTAGCCGGCCTGAGAGGGTGACCGGTCACATTGGGACTGAGATACGGCCCAGACTCCTACGGGAGGCAGCA	D_0__Bacteria;D_1__Actinobacteria;D_2__Actinobacteria;D_3__Actinomycetales;D_4__Actinomycetaceae;D_5__Actinomyces	0	0	0	0	0	0	0	0	0	0	0	0	0	0	0	0	0	0	0	0	0	0	0	0	0.0227933	0	0	0	0	0	0	0	0	0	0	0	0	0	0	0	0	0	0	0
1c70c376402055bb06e861b30cd79f34	Actinomyces oris			AGAGTTTGATCATGGCTCAGGACGAACGCTGGCGGCGTGCTTAACACATGCAAGTCGAACGGTGAAGCGCCTTCCTTTGTGGTGGGTGTGGATGAGTGGCGAACGGGTGAGTAACACGTGAGTAACCTGCCCCCTTCTTCTGGATAACCGCATGAAAGTGTGGCTAATACGGGATATTCTGTGCCTGCTGCATGGTGGGTGTGGGAAAGATTGCGCCTTTGGGTGTTTTTGGTGGGGGATGGGCTCGCGGCCTATCAGCTTGTTGGTGGGGTGATGGCCTACCAAGGCGGTGACGGGTAGCCGGCCTGAGAGGGTGGACGGTCACACTGGGACTGAGACACGGCCCAGACTCCTACGGGAGGCAGCA	D_0__Bacteria;D_1__Actinobacteria;D_2__Actinobacteria;D_3__Actinomycetales;D_4__Actinomycetaceae;D_5__Actinomyces;D_6__Actinomyces oris	0	0	0	0	0	0	0	0	0	0	0	0	0	0	0	0	0	0	0	0	0	0	0	0	0	0	0	0	0	0	0	0	0	0	0	0	0	0	0.0467792	0	0	0	0	0
19f72bd9de4e6254027100ecaf5ec0c1	Actinomyces sp.	99.726	99.1758	AGAGTTTGATTATGGCTCAGGACGAACGCTGGCGGCGTGCTTAACACATGCAAGTCGAACGGGCCTGCCTGGCTTTGGTTGGGTGGGTGAGTGGCGAACGGGTGAGTAACACGTGAGTAACCTGCCCTCTTCTCTTGGATAACTGCTTGAAAGGGCGGCTAATACGGGATGTTCTGGCTGCCTCGCATGGGGTGGTTTGGAAAGATTCGGCCTGGTTTTGGTTGTTTTGGTGGGGGATGGGCTCGCGGCTTATCAGCTTGTTGGTGGGGTGATGGCCTACCAAGGCGGTGACGGGTAGCCGGCCTGAGAGGGTGGACGGTCACACTGGGACTGAGACACGGCCCAGACTCCTACGGGAGGCAGCA	D_0__Bacteria;D_1__Actinobacteria;D_2__Actinobacteria;D_3__Actinomycetales;D_4__Actinomycetaceae;D_5__Actinomyces;D_6__Actinomyces sp. oral taxon 448 str. F0400	0	0	0	0	0	0	0	0	0	0	0	0	0	0	0	0	0	0	0.014453	0	0	0	0	0	0	0	0	0	0	0	0	0	0	0	0	0	0	0	0	0	0	0	0	0
3803c03264bbbf08f2bd1c9b7770b8e8	Actinomyces sp.	100	99.4286	AGGGTTTGATCATGGCTCAGGACGAACGCTGGCGGCGTGCTTAACACATGCAAGTCGAACGCTGAAGGCCCAGCTTGCTGGGTTGGATGAGTGGCGAACGGGTGAGTAACACGTGAGTAACCTGCCCTCTTCTTTGGGATAACGGTCGGAAACGGCTGCTAATACCGGGTATTCACTGTCCTTCGCATGGGGGGTGGTGGAAAGGTTTTTTCTGGTGGGGGATGGGCTCGCGGCCTATCAGCTTGTTGGTGGGGTGATGGCTTACCAAGGCTTTGACGGGTAACCGGCCTGAGAGGGTGACCGGTCACATTGGGACTGAGATACGGCCCAGACTCCTACGGGAGGCAGCA	D_0__Bacteria;D_1__Actinobacteria;D_2__Actinobacteria;D_3__Actinomycetales;D_4__Actinomycetaceae;D_5__Actinomyces;D_6__Actinomyces sp. ph3	0	0	0	0	0	0	0	0	0	0	0.0236267	0	0	0	0	0	0	0	0	0	0	0	0	0	0	0	0	0	0	0	0	0	0	0	0	0	0	0	0	0	0	0	0	0
7f5955eeba59776d3643a024e68183f7	Actinomyces sp.	100	99.7167	AGAGTTTGATTATGGCTCAGGACGAACGCTGGCGGCGTGCTTAACACATGCAAGTCGAACGGTGAAGGGACCAGCTTGCTGGTTCTGGATGAGTGGCGAACGGGTGAGTAACACGTGAGTAACCTGCCCCCTTCTTCTGGATAACCGCATGAAAGTGTGGCTAATACGGGATATTCTGGGTCTGTCGCATGACGGGCCCGGGAAAGATATTGTTTCGGTGGGGGATGGGCTCGCGGCCTATCAGCTTGTTGGTGGGGTGATGGCCTACCAAGGCGGTGACGGGTAGCCGGCCTGAGAGGGTGGACGGTCACACTGGGACTGAGACACGGCCCAGACTCCTACGGGAGGCAGCA	D_0__Bacteria;D_1__Actinobacteria;D_2__Actinobacteria;D_3__Actinomycetales;D_4__Actinomycetaceae;D_5__Actinomyces	0	0	0	0	0	0	0	0	0	0	0	0	0	0	0	0	0	0	0	0	0	0	0	0	0	0	0	0	0	0	0	0	0	0	0	0	0	0	0.149694	0	0	0	0	0
7fa47f7a8a4e339dae2494efe9c19408	Actinomyces sp.	100	99.1429	AGAGTTTGATTATGGCTCAGGACGAACGCTGGCGGCGTGCTTAACACATGCAAGTCGAACGCTGAAGGCCCAGCTTGCTGGGTTGGATGAGTGGCGAACGGGTGAGTAACACGTGAGTAACCTGCCCCCTTCTTTGGGATAACGGTCGGAAACGGCTGCTAATACCGGGTATTCACTGTCCTTCGCATGGGGGGTGGTGGAAAGGTTTTTTCTGGTGGGGGATGGGCTCGCGGCCTATCAGCTTGTTGGTGGGGTGATGGCTTACCAAGGCTTTGACGGGTAACCGGCCTGAGAGGGTGACCGGTCACATTGGGACTGAGATACGGCCCAGACTCCTACGGGAGGCAGCA	D_0__Bacteria;D_1__Actinobacteria;D_2__Actinobacteria;D_3__Actinomycetales;D_4__Actinomycetaceae;D_5__Actinomyces;D_6__Actinomyces sp. ph3	0	0	0	0	0	0	0	0	0	0	0	0	0	0	0	0.105623	0	0	0	0	0	0	0	0	0	0	0	0	0	0	0	0	0	0	0	0	0	0	0	0	0	0	0	0
9ea3d340cc6ecaba29709f52e9186cbd	Actinomyces sp.	100	99.1501	AGGGTTTGATTATGGCTCAGGACGAACGCTGGCGGCGTGCTTAACACATGCAAGTCGAACGGTGAAGGGACCAGCTTGCTGGTTCTGGATGAGTGGCGAACGGGTGAGTAACACGTGAGTAACCTGCCCCCTTCTTCTGGATAACCGCATGAAAGTGTGGCTAATACGGGATATTCTGGGTCTGTCGCATGACGGGCCCGGGAAAGATATTGCTTCGGTGGGGGATGGGCTCGCGGCCTATCAGCTTGTTGGTGGGGTGATGGCCTACCAAGGCGGTGACGGGTAGCCGGCCTGAGAGGGTGGACGGTCACACTGGGACTGAGACACGGCCCAGACTCCTACGGGAGGCAGCA	D_0__Bacteria;D_1__Actinobacteria;D_2__Actinobacteria;D_3__Actinomycetales;D_4__Actinomycetaceae;D_5__Actinomyces	0	0	0	0	0	0	0	0	0	0	0	0	0	0	0	0	0	0	0	0	0	0	0	0	0	0	0	0	0	0	0	0	0	0	0	0	0	0	0	0	0	0	0	0
a8bce10c70037be5a3dab34a5cc11568	Actinomyces sp.	100.86	96.0227	AGAGTTTGATCATGGCTCAGGACGAACGCTGGCGGCGCGCCTAACACATGCAAGTCGAACGAGAAAGAGGGAGCTTGCTCCCTTGATCGAGTGGCGAACGGGTGAGTAACACGTGAGTAACCTGCCCTCTTCTTTGGGATAACGGTCGGAAACGGCTGCTAATACTGGATATTCACTCATTGGCGCATGTTGGTGGGTGGAAAGGTTTTTCTGGTGGGGGATGGGCTCGCGGCCTATCAGCTTGTTGGTGGGGTGATGGCCTACCAAGGCTTTGACGGGTAACCGGCCTGAGAGGGTGACCGGTCACATTGGGACTGAGATACGGCCCAGACTCCTACGGGAGGCAGCA	D_0__Bacteria;D_1__Actinobacteria;D_2__Actinobacteria;D_3__Actinomycetales;D_4__Actinomycetaceae;D_5__Actinomyces	0	0	0	0	0	0	0	0	0	0	0	0	0	0	0	0	0	0	0	0	0	0	0	0	0	0	0	0	0	0	0	0	0	0	0.0100852	0	0	0	0	0	0	0	0	0
c4accba7b637dd0e9dc152f88134fab5	Actinomyces sp.	100	98.2857	AGGGTTTGATTATGGCTCAGGACGAACGCTGGCGGCGTGCTTAACACATGCAAGTCGAACGCTGAAGCTCAGCTTTTGTTGGGTGGATGAGTGGCGAACGGGTGAGTAACACGTGAGTAACCTGCCCTCTTCTTTGGGATAACGCCCGGAAACGGGTGCTAATACTGGATATTCACTGGCCTTCGCATGGGGGTTGGTGGAAAGGTTTGTTCTGGTGGGGGATGGGCTCGCGGCCTATCAGCTTGTTGGTGGGGTGATGGCCTACCAAGGCTTTGACGGGTAGCCGGCCTGAGAGGGTGACCGGTCACATTGGGACTGAGATACGGCCCAGACTCCTACGGGAGGCAGCA	D_0__Bacteria;D_1__Actinobacteria;D_2__Actinobacteria;D_3__Actinomycetales;D_4__Actinomycetaceae;D_5__Actinomyces	0	0	0	0	0	0	0	0	0	0	0	0	0	0	0	0	0	0	0	0	0	0	0	0	0	0	0	0	0	0	0	0	0	0	0	0	0	0	0.491182	0	0	0	0	0
da059b7b281d30060445f3cebcf252a6	Actinomyces sp.	100	98.2857	AGGGTTTGATTATGGCTCAGGACGAACGCTGGCGGCGTGCTTAACACATGCAAGTCGAACGCTGAAGCTCAGCTTTTGTTGGGTGGATGAGTGGCGAACGGGTGAGTAACACGTGAGTAACCTGCCCTCTTCTTTGGGATAACGCCCGGAAACGGGTGCTAATACTGGATATTCACTGATCTTCGCATGGGGGTTGGTGGAAAGGTTTGTTCTGGTGGGGGATGGGCTCGCGGCCTATCAGCTTGTTGGTGGGGTGATGGCCTACCAAGGCTTTGACGGGTAGCCGGCCTGAGAGGGTGACCGGTCACATTGGGACTGAGATACGGCCCAGACTCCTACGGGAGGCAGCA	D_0__Bacteria;D_1__Actinobacteria;D_2__Actinobacteria;D_3__Actinomycetales;D_4__Actinomycetaceae;D_5__Actinomyces	0	0	0	0	0	0	0	0	0	0	0	0	0	0	0	0	0	0	0	0	0	0	0	0	0	0	0	0	0	0	0	0	0	0	0	0	0	0	0.725078	0	0.0422104	0	0	0
e86efd0e8471e8c6fc96605d7d10c38b	Actinomyces sp.	96.0227	99.1124	AGGGTTTGATTATGGCTCAGGACGAACGCTGGCGGCGTGCTTAACACATGCAAGTCGAACGCTGAAGACCTGGCTTTTGTTGGGTTGGATGAGTGGCGAACGGGTGAGTAACACGTGAGTAACCTGCCCCCTTCTTTGGGATAACGCCCGGAAACGGGTGCTAATACTGGATATTCACTGGCCTTCGCATGGGGGTTGGTGGAAAGGTTTGTTCTGGTGGGGGATGGGCTCGCGGCCTATCAGCTTGTTGGTGGGGTGATGGCCTACCAAGGCTTTGACGGGTAGCCGGCCTGAGAGGGTGACCGGTCACATTGGGACTGAGATACGGCCCAGACTCCTACGGGAGGCAGCA	D_0__Bacteria;D_1__Actinobacteria;D_2__Actinobacteria;D_3__Actinomycetales;D_4__Actinomycetaceae;D_5__Actinomyces	0	0	0	0	0	0	0	0	0	0	0	0	0	0	0	0	0	0	0	0	0	0	0	0	0	0	0	0	0	0	0	0	0	0	0	0	0	0	0.346166	0	0	0	0	0
eb2545bd1fc21dbc457775470e1b4716	Actinomyces sp.	100	98	AGGGTTTGATTATGGCTCAGGACGAACGCTGGCGGCGTGCTTAACACATGCAAGTCGAACGCTGAAGCTCAGCTTTTGTTGGGTGGATGAGTGGCGAACGGGTGAGTAACACGTGAGTAACCTGCCCTCTTCTTTGGGATAACGCCCGGAAACGGGTGCTAATACTGGATATTCACTGGCCTTCGCATGGGGGTTGGTGGAAAGGTTTGTTCTGGTGGGGGATGGGCTCGCGGCCTATCAGCTTGTTGGTGGGGTGATGGCCTACCAAGGCTTTGACGGGTAGCCGGCCTGAGAGGGTGACCGGTCACATTGTGACTGAGATACGGCCCAGACTCCTACGGGAGGCAGCA	D_0__Bacteria;D_1__Actinobacteria;D_2__Actinobacteria;D_3__Actinomycetales;D_4__Actinomycetaceae;D_5__Actinomyces	0	0	0	0	0	0	0	0	0	0	0	0	0	0	0	0	0	0	0	0	0	0	0	0	0	0	0	0	0	0	0	0	0	0	0	0	0	0	0.0421013	0	0	0	0	0
f08679dfdb12d96d21fa433bcf36d9ec	Actinomyces sp.	100	99.1429	AGGGTTTGATCATGGCTCAGGACGAACGCTGGCGGCGTGCTTAACACATGCAAGTCGAACGCTGAAGGCCCAGCTTGCTGGGTTGGATGAGTGGCGAACGGGTGAGTAACACGTGAGTAACCTGCCCCCTTCTTTGGGATAACGGTCGGAAACGGCTGCTAATACCGGGTATTCACTGTCCTTCGCATGGGGGGTGGTGGAAAGGTTTTTTCTGGTGGGGGATGGGCTCGCGGCCTATCAGCTTGTTGGTGGGGTGATGGCTTACCAAGGCTTTGACGGGTAACCGGCCTGAGAGGGTGACCGGTCACATTGGGACTGAGATACGGCCCAGACTCCTACGGGAGGCAGCA	D_0__Bacteria;D_1__Actinobacteria;D_2__Actinobacteria;D_3__Actinomycetales;D_4__Actinomycetaceae;D_5__Actinomyces;D_6__Actinomyces sp. ph3	0	0	0	0	0	0	0	0	0	0	0	0	0	0	0	0	0	0	0	0	0	0	0	0	0	0	0	0	0	0	0	0	0	0	0	0	0	0	0	0	0	0	0	0
06e59aa1e67abdb5e74ecd8bbcafad5f	Actinomyces turicensis			AGGGTTTGATCATGGCTCAGGACGAACGCTGGCGGCGTGCTTAACACATGCAAGTCGAACGATGATGCTCCAGCTTTGTTGGGGTGGATTAGTGGCGAACGGGTGAGTAACACGTGAGTAACCTGCCCTCTTCTTTGGGATAACGGTCGGAAACGGCTGCTAATACTGGATATTCACTCATTGGCGCATGTTGGTGGGTGGAAAGGTTTTTTCTGGTGGGGGATGGGCTCGCGGCCTATCAGCTTGTTGGTGGGGTGATGGCCTACCAAGGCTTTGACGGGTAACCGGCCTGAGAGGGTGACCGGTCACATTGGGACTGAGATACGGCCCAGACTCCTACGGGAGGCAGCA	D_0__Bacteria;D_1__Actinobacteria;D_2__Actinobacteria;D_3__Actinomycetales;D_4__Actinomycetaceae;D_5__Actinomyces;D_6__Actinomyces turicensis ACS-279-V-Col4	0	0	0	0	0	0	0	0	0	0	0	0	0	0	0	0	0.519851	0	0	0	0	0	0.18314	0.267799	0	0	0	0	0	0	0	0	0	0.365605	0	0	0.454664	0	0	0	0	0	0	0
15261b3cca9116fbb23aedcb1450ba33	Actinomyces turicensis			AGAGTTTGATTATGGCTCAGGACGAACGCTGGCGGCGTGCTTAACACATGCAAGTCGAACGATGATGCTCCAGCTTTGTTGGGGTGGATTAGTGGCGAACGGGTGAGTAACACGTGAGTAACCTGCCCTCTTCTTTGGGATAACGGTCGGAAACGGCTGCTAATACTGGATATTCACTCATTGGCGCATGTTGGTGGGTGGAAAGGTTTTTTCTGGTGGGGGATGGGCTCGCGGCCTATCAGCTTGTTGGTGGGGTGATGGCCTACCAAGGCTTTGACGGGTAACCGGCCTGAGAGGGTGACCGGTCACATTGGGACTGAGATACGGCCCAGACTCCTACGGGAGGCAGCA	D_0__Bacteria;D_1__Actinobacteria;D_2__Actinobacteria;D_3__Actinomycetales;D_4__Actinomycetaceae;D_5__Actinomyces;D_6__Actinomyces turicensis ACS-279-V-Col4	0	0	0	0	0	0	0	0	0	0	0	0	0	0	0	0	0.308483	0	0	0	0	0	0.226232	0.0849118	0.0569833	0	0.267723	0	0	0.285729	0	0	0	0.0914013	0	0	0.412142	0	0	0	0.204017	0	0	0
22fe0a04a1233828d50fbdf99600921b	Actinomyces turicensis			AGGGTTTGATCATGGCTCAGGACGAACGCTGGCGGCGTGCTTAACACATGCAAGTCGAACGATGATGCTCCAGCTTTGTTGGGGTGGATTAGTGGCGAACGGGTGAGTAACACGTGAGTAACCTGCCCTCTTCTTTGGGATAACGGTCGGAAACGGCTGCTAATACTGGATATTCACTCATTGGCGCATGTTGGTGGGTGGAAAGGTTTTTCTGGTGGGGGATGGGCTCGCGGCCTATCAGCTTGTTGGTGGGGTGATGGCCTACCAAGGCTTTGACGGGTAACCGGCCTGAGAGGGTGACCGGTCACATTGGGACTGAGATACGGCCCAGACTCCTACGGGAGGCAGCA	D_0__Bacteria;D_1__Actinobacteria;D_2__Actinobacteria;D_3__Actinomycetales;D_4__Actinomycetaceae;D_5__Actinomyces;D_6__Actinomyces turicensis ACS-279-V-Col4	0	0	0	0	0	0	0	0	0	0	0	0	0	0	0	0	0	0	0	0	0	0.0254033	0	0	0	0	0	0	0	0	0.42961	0	0	0	0	0	0	0	0	0	0	0	0	0
2e83493c90da6062265b93fe9294a16d	Actinomyces turicensis			AGGGTTTGATTATGGCTCAGGACGAACGCTGGCGGCGTGCTTAACACATGCAAGTCGAACGATGATGCTCTGGTTTTCTGGGGTGGATTAGTGGCGAACGGGTGAGTAACACGTGAGTAACCTGCCCTCTTCTTTGGGATAACGGTCGGAAACGGCTGCTAATACTGGATATTCACTCATTGGCGCATGTTGGTGGGTGGAAAGGTTTTTTCTGGTGGGGGATGGGCTCGCGGCCTATCAGCTTGTTGGTGGGGTGATGGCCTACCAAGGCTTTGACGGGTAACCGGCCTGAGAGGGTGACCGGTCACATTGGGACTGAGATACGGCCCAGACTCCTACGGGAGGCAGCA	D_0__Bacteria;D_1__Actinobacteria;D_2__Actinobacteria;D_3__Actinomycetales;D_4__Actinomycetaceae;D_5__Actinomyces;D_6__Actinomyces turicensis ACS-279-V-Col4	0	0	0	0	0	0	0	0	0	0	0	0	0	0	0	0	0	0	0	0	2.66141	0	0	0	0	0	0	0.35923	0	0	0	0	0	0	0	0.217421	0	0	0	0	0	0	0	0
795e02e0604b3349015d7cbb3dbddd10	Actinomyces turicensis			AGGGTTTGATTATGGCTCAGGACGAACGCTGGCGGCGTGCTTAACACATGCAAGTCGAACGATGATGCTCCAGCTTTGTTGGGGTGGATTAGTGGCGAACGGGTGAGTAACACGTGAGTAACCTGCCCTCTTCTTTGGGATAACGGTCGGAAACGGCTGCTAATACTGGATATTCACTCATTGGCGCATGTTGGTGGGTGGAAAGGTTTTTTCTGGTGGGGGATGGGCTCGCGGCCTATCAGCTTGTTGGTGGGGTGATGGCCTACCAAGGCTTTGACGGGTAACCGGCCTGAGAGGGTGACCGGTCACATTGGGACTGAGATACGGCCCAGACTCCTACGGGAGGCAGCA	D_0__Bacteria;D_1__Actinobacteria;D_2__Actinobacteria;D_3__Actinomycetales;D_4__Actinomycetaceae;D_5__Actinomyces;D_6__Actinomyces turicensis ACS-279-V-Col4	0	0.26864	0	0	0	0	0	0.229568	0	0	0	0.277878	0.322129	0	0	0	0.428449	0	0	0	0	0	0.317802	0	0	0	0	0	0	0	0	0	0.238344	0	0	0	0.572419	0	0	0	0	0	0.337892	0
79828d5e539e6e36f040c985b72129fd	Actinomyces turicensis			AGGGTTTGATTATGGCTCAGGACGAACGCTGGCGGCGTGCTTAACACATGCAAGTCGAACGATGATGCTCCAGCTTTGTTGGGGTGGATTAGTGGCGAACGGGTGAGTAACACGTGAGTAACCTGCCCTCTTCTTTGGGATAACGGTCGGAAACGGCTGCTAATACTGGATATTCACTCATTGGCGCATGTTGGTGGGTGGAAAGGTTTTTCTGGTGGGGGATGGGCTCGCGGCCTATCAGCTTGTTGGTGGGGTGATGGCCTACCAAGGCTTTGACGGGTAACCGGCCTGAGAGGGTGACCGGTCACATTGGGACTGAGATACGGCCCAGACTCCTACGGGAGGCAGCA	D_0__Bacteria;D_1__Actinobacteria;D_2__Actinobacteria;D_3__Actinomycetales;D_4__Actinomycetaceae;D_5__Actinomyces;D_6__Actinomyces turicensis ACS-279-V-Col4	0	0	0	0	0	0	0	0	0	0	0	0	0	0.0472869	0	0	0	0	0	0	0	0	0	0	0	0	0	0	0	0	0	0	0	0	0	0	0	0	0	0	0	0	0	0
9c076b52094e0c72460241cae565bc54	Actinomyces turicensis			AGGGTTTGATTATGGCTCAGGACGAACGCTGGCGGCGTGCTTAACACATGCAAGTCGAACGATGATGCTCCAGCTTGCTGGGGTGGATTAGTGGCGAACGGGTGAGTAACACGTGAGTAACCTGCCCTCTTCTTTGGGATAACGGTCGGAAACGGCTGCTAATACTGGATATTCACTCATTGGCGCATGTTGGTGGGTGGAAAGGTTTTTTCTGGTGGGGGATGGGCTCGCGGCCTATCAGCTTGTTGGTGGGGTGATGGCCTACCAAGGCTTTGACGGGTAACCGGCCTGAGAGGGTGACCGGTCACATTGGGACTGAGATACGGCCCAGACTCCTACGGGAGGCAGCA	D_0__Bacteria;D_1__Actinobacteria;D_2__Actinobacteria;D_3__Actinomycetales;D_4__Actinomycetaceae;D_5__Actinomyces;D_6__Actinomyces turicensis ACS-279-V-Col4	0	0	0	0	0	0	0	0	0	0	0	0	0	0	0	0	0	0	0	0	0	0	0	0	0	0	0	0	0	0	0	0	0	0	0	0.357838	0	0	0	0	0	0	0	0
db28111268235686ec85962e0566fce4	Actinomyces turicensis			AGGGTTTGATCATGGCTCAGGACGAACGCTGGCGGCGTGCTTAACACATGCAAGTCGAACGATGATGCTCTGGTTTTCTGGGGTGGATTAGTGGCGAACGGGTGAGTAACACGTGAGTAACCTGCCCTCTTCTTTGGGATAACGGTCGGAAACGGCTGCTAATACTGGATATTCACTCATTGGCGCATGTTGGTGGGTGGAAAGGTTTTTCTGGTGGGGGATGGGCTCGCGGCCTATCAGCTTGTTGGTGGGGTGATGGCCTACCAAGGCTTTGACGGGTAACCGGCCTGAGAGGGTGACCGGTCACATTGGGACTGAGATACGGCCCAGACTCCTACGGGAGGCAGCA	D_0__Bacteria;D_1__Actinobacteria;D_2__Actinobacteria;D_3__Actinomycetales;D_4__Actinomycetaceae;D_5__Actinomyces;D_6__Actinomyces turicensis ACS-279-V-Col4	0	0	0	0	0	0	0	0	0	0	0	0	0	0	0	0	0	0	0	0	0	0	0	0	0	0	0	0	0	0	0	0	0	0	0	0	0	0	0	0	0	0	0	0
fae868d9e3f35f069835d3361571a729	Actinomyces turicensis			AGAGTTTGATTATGGCTCAGGACGAACGCTGGCGGCGTGCTTAACACATGCAAGTCGAACGATGATGCTCCAACTTTGTTGGGGTGGATTAGTGGCGAACGGGTGAGTAACACGTGAGTAACCTGCCCTCTTCTTTGGGATAACGGTCGGAAACGGCTGCTAATACTGGATATTCACTCATTGGCGCATGTTGGTGGGTGGAAAGGTTTTTTCTGGTGGGGGATGGGCTCGCGGCCTATCAGCTTGTTGGTGGGGTGATGGCCTACCAAGGCTTTGACGGGTAACCGGCCTGAGAGGGTGACCGGTCACATTGGGACTGAGATACGGCCCAGACTCCTACGGGAGGCAGCA	D_0__Bacteria;D_1__Actinobacteria;D_2__Actinobacteria;D_3__Actinomycetales;D_4__Actinomycetaceae;D_5__Actinomyces;D_6__Actinomyces turicensis ACS-279-V-Col4	0	0	0	0	0	0	0	0	0	0	0	0.392654	0	0	0	0	0	0	0	0	0	0	0	0	0	0	0	0	0	0	0	0	0	0	0	0	0	0	0	0	0	0	0	0
18cb93ca5814594744bb6a8cf38abc3b	Chlamydia trachomatis			AGAGTTTGATTATGGCTCAGGACGAACGCTGGCGGCGTGCTTAACACATGCAAGTCGAACGATGAAGGAAGAGCTTGCTTTTCTGGATTAGTGGCGAACGGGTGAGTAACACGTGAGTAACCTGCCCTCTTCTTTGGGATAACGGTCGGAAACGGCTGCTAATACTGGATATTCACTCATTGGCGCATGTTGGTGGGTGGAAAGGTTTTTTCTGGTGGGGGATGGGCTCGCGGCCTATCAGCTTGTTGGTGGGGTGATGGCCTACCAAGGCTTTGACGGGTAACCGGCCTGAGAGGGTGACCGGTCACATTGGGACTGAGATACGGCCCAGACTCCTACGGGAGGCAGCA	D_0__Bacteria;D_1__Actinobacteria;D_2__Actinobacteria;D_3__Actinomycetales;D_4__Actinomycetaceae;D_5__Actinomyces;D_6__Chlamydia trachomatis	0	0	0	0	0	0	0	0	0	0	0	0	0	0	0	0	0	0	0	0	0	0	0	0	0	0	0	0	0	0.250013	0	0	0	0	0	0	0	0	0	0	0	0	0	0
b667ec0afe2f8eee589294415d7a999e	Chlamydia trachomatis			AGGGTTTGATTATGGCTCAGGACGAACGCTGGCGGCGTGCTTAACACATGCAAGTCGAACGATGAAGGAAGAGCTTGCTTTTCTGGATTAGTGGCGAACGGGTGAGTAACACGTGAGTAACCTGCCCTCTTCTTTGGGATAACGGTCGGAAACGGCTGCTAATACTGGATATTCACTCATTGGCGCATGTTGGTGGGTGGAAAGGTTTTTTCTGGTGGGGGATGGGCTCGCGGCCTATCAGCTTGTTGGTGGGGTGATGGCCTACCAAGGCTTTGACGGGTAACCGGCCTGAGAGGGTGACCGGTCACATTGGGACTGAGATACGGCCCAGACTCCTACGGGAGGCAGCA	D_0__Bacteria;D_1__Actinobacteria;D_2__Actinobacteria;D_3__Actinomycetales;D_4__Actinomycetaceae;D_5__Actinomyces;D_6__Chlamydia trachomatis	0	0	0	0	0	0	0	0.112233	0	0	0	0	0	0	0	0	0	0	0	0	0	0	0	0	0	0	0	0	0	0	0	0	0	0	0	0	0	0	0	0	0	0	0	0
14dc02b9408dab663dcd2ed2a1ee9aec	Coriobacteriaceae bacterium			AGGGTTTGATTATGGCTCAGGATGAACGCTGGCGGCGTGCCTAACACATGCAAGTCGAACGGTTAAGACGGCTTCGGCCGTGAATAGAGTGGCGAACGGGTGAGTAACACGTGACCAACCTGCCCTCCGCACCGGGACAACCGGGGGAAACCCCGGCTAATACCGGACGATCCCGGCCCCCCGCATGGGGGGCCGGGCGAAGCCCAGGCGGCGGGGGATGGGGTCGCGGCCCATTAGGTAGACGGCGGGGCAACGGCCCACCGTGCCGACGATGGGTAGCCGGGTTGAGAGACCGACCGGCCACATTGGGACTGAGATACGGCCCAGACTCCTACGGGAGGCAGCA	D_0__Bacteria;D_1__Actinobacteria;D_2__Coriobacteriia;D_3__Coriobacteriales;D_4__Eggerthellaceae;D_5__DNF00809;D_6__Coriobacteriaceae bacterium 68-1-3	0	0	0	0	0	0	0	0	0	0	0	0	0	0	0	0	0.17138	0	0	0	0.369809	0	0	0	0	0	0	0	0	0	0	0	0	0	0	0	0	0	0	0	0	0	0	0
3c5ff5cc5567dc28c36dbf945ec9f867	Coriobacteriaceae bacterium			AGAGTTTGATTATGGCTCAGGATGAACGCTGGCGGCGTGCCTAACACATGCAAGTCGAACGGTTAAGACGGCTCCGGCCGTGAATAGAGTGGCGAACGGGTGAGTAACACGTGACCAACCTGCCCTCCGCACCGGGACAACCGGGGGAAACCCCGGCTAATACCGGACGATCCCGGGGCCCCGCATGGGGGCCCGGGCGAAGCCTCGGCGGCGGGGGATGGGGTCGCGGCCCATTAGGTAGACGGCGGGGCAACGGCCCACCGTGCCGACGATGGGTAGCCGGGTTGAGAGACCGACCGGCCACATTGGGACTGAGATACGGCCCAGACTCCTACGGGAGGCAGCA	D_0__Bacteria;D_1__Actinobacteria;D_2__Coriobacteriia;D_3__Coriobacteriales;D_4__Eggerthellaceae;D_5__DNF00809;D_6__Coriobacteriaceae bacterium 68-1-3	0	0	0	0	0	0	0	0	0	0	0	0	0	0	0	0	0	0	0	0	0	0	0	0	0	0	0	0	0	0	0	0	0	0	0	0	0.0392516	0	0	0	0	0	0	0
71856db1091ebeb0ca43dc198a7c5774	Coriobacteriaceae bacterium			AGAGTTTGATTATGGCTCAGGATGAACGCTGGCGGCGTGCCTAACACATGCAAGTCGAACGGTTAAGACGGCTTCGGCCGTGAATAGAGTGGCGAACGGGTGAGTAACACGTGACCAACCTGCCCTCCGCACCGGGACAACCGGGGGAAACCCCGGCTAATACCGGACGATCCCGGCCCCCCGCATGGGGGGCCGGGCGAAGCCCAGGCGGCGGGGGATGGGGTCGCGGCCCATTAGGTAGACGGCGGGGCAACGGCCCACCGTGCCGACGATGGGTAGCCGGGTTGAGAGACCGACCGGCCACATTGGGACTGAGATACGGCCCAGACTCCTACGGGAGGCAGCA	D_0__Bacteria;D_1__Actinobacteria;D_2__Coriobacteriia;D_3__Coriobacteriales;D_4__Eggerthellaceae;D_5__DNF00809;D_6__Coriobacteriaceae bacterium 68-1-3	0	0	0	0	0	0	0	0	0	0	0	0	0	0	0	0	0	0	0	0	0	0	0	0	0	0	0	0	0	0	0	0	0	0	0	0	0	0	0	0	0	0	0	0
126b6e319f52484d40503db6a57e4133	Coriobacteriales bacterium			AGGGTTTGATTATGGCTCAGGATGAACGCTGGCGGCGTGCCTAACACATGCAAGTCGAACGATTAAAGCACCTTCGGGTGTGTATAGAGTGGCGAACGGGTGAGTAACACGTGACCAACCTGCCTCTTACATTGGGACAACCAAAAGAAATTCTGGCTAATACCAAATACTCCGCACATATCACATGATGTATGCGGGAAAGCTTTTGCGGTAAGAGATGGGGTCGCGGCCCATTAGGTAGACGGCGGGGTAGAAGCCCACCGTGCCGATGATGGGTAGCCGGGTTGAGAGACCGACCGGCCACATTGGGACTGAGATACGGCCCAGACTCCTACGGGAGGCAGCA	D_0__Bacteria;D_1__Actinobacteria;D_2__Coriobacteriia;D_3__Coriobacteriales;D_4__Eggerthellaceae;D_5__DNF00809;D_6__Coriobacteriales bacterium DNF00809	0.056346	0	0	0	0	0	0	0	0	0	0	0	0	0	0	0	0	0.239621	0	0	0	0	0	0	0	0	0	0	0	0	0	0	0	0.274204	0	0	0	0	0	0.0860153	0	0	0.175321	0
2c92bb7c39c495c1fd8e9c163e453fb8	Dialister hominis	100	99.1914	AGAGTTTGATTATGGCTCAGGACGAACGCTGGCGGCGTGCTTAACACATGCAAGTCGAACGGGAGGAAAAGAGAAGCTTGCTTTTTTTTGAATCTAGTGGCAAACGGGTGAGTAACACGTAAACAACCTGCCTTCAGGATGGGGACAACAGACGGAAACGACTGCTAATACCGAATGTGTTCCGGAGACCGCATGATTTCCGGAAGAAAGGATGGCCTCTATTTATAAGCTATCGCCTGAAGAGGGGTTTGCGTCTGATTAGGCAGTTGGTGAGGTAACGGCCCACCAAACCTACGATCAGTAGCCGGTCTGAGAGGATGAACGGCCACACTGGAACTGAGACACGGTCCAGACTCCTACGGGAGGCAGCA	D_0__Bacteria;D_1__Firmicutes;D_2__Negativicutes;D_3__Selenomonadales;D_4__Veillonellaceae;D_5__Dialister;D_6__gut metagenome	0	0	0	0	0	0	0	0	0	0	0	0	0	0	0	0	0	0	0	0	0	0	0	0	0	0	0	0	0	0	0	0	0	0	0	0	0	0.148459	0	0	0	0	0	0
d333907798247d1d0f3b97123a024b84	Dialister hominis	100	99.1914	AGGGTTTGATTATGGCTCAGGACGAACGCTGGCGGCGTGCTTAACACATGCAAGTCGAACGGGAGGAAAAGAGAAGCTTGCTTCTTTTTGAATCTAGTGGCAAACGGGTGAGTAACACGTAAACAACCTGCCTTCAGGATGGGGACAACAGACGGAAACGACTGCTAATACCGAATGTGTTCCGGAGACCGCATGATTTCCGGAAGAAAGGATGGCCTCTATTTATAAGCTATCGCCTGAAGAGGGGTTTGCGTCTGATTAGGCAGTTGGTGAGGTAACGGCCCACCAAACCTACGATCAGTAGCCGGTCTGAGAGGATGAACGGCCACACTGGAACTGAGACACGGTCCAGACTCCTACGGGAGGCAGCA	D_0__Bacteria;D_1__Firmicutes;D_2__Negativicutes;D_3__Selenomonadales;D_4__Veillonellaceae;D_5__Dialister;D_6__gut metagenome	0	0	0	0	0	0	0	0	0	0	0	0	0	0	0	0	0	0	0	0	0	0	0	0	0	0	0	0	0	0	0	0	0	0	0	0	0	0.174278	0	0	0	0	0	0
09e3b59aabefd2e7d5591468f6df8d6f	Dialister invisus	99.4609	98.103	AGGGTTTGATTATGGCTCAGGACGAACGCTGGCGGCGTGCTTAACACATGCAAGTCGAACGAAAAGACGGAAAGAGCTTGCTCTTTTCAGAATTGAGTGGCAAACGGGTGAGTAACACGTAAACAACCTGCCTTCAGGATGGGGACAACAGACGGAAACGACTGCTAATACCGAATAGCTTCCAGAGATCGCATGATCCATGGAAGAAAAGGTGGCCTCTACCTGTAAGCTATCGCCTGAAGAGGGGTTTGCGTCTGATTAGCTGGTTGGAGGGGTAACGGCCCACCAAGGCGACGATCAGTAGCCGGTCTGAGAGGATGAACGGCCACACTGGAACTGAGACACGGTCCAGACTCCTACGGGAGGCAGCA	D_0__Bacteria;D_1__Firmicutes;D_2__Negativicutes;D_3__Selenomonadales;D_4__Veillonellaceae;D_5__Dialister	0	0	0	0	0	0	0	0	0	0	0.15948	0	0	0	0	0	0	0	0	0	0	0	0	0	0	0	0	0	0	0	0	0	0	0	0	0	0	0	0	0	0	0	0	0
26b3d6eefcd6f011f4373238b2b57136	Dialister invisus	99.1914	98.6413	AGGGTTTGATTATGGCTCAGGACGAACGCTGGCGGCGTGCTTAACACATGCAAGTCGAACGAAAAGAGGGAAAGAGCTTGCTCTTTCCGGAATTGAGTGGCAAACGGGTGAGTAACACGTAAACAACCTGCCTTCAGGATGGGGACAACAGACGGAAACGACTGCTAATACCGAATAAGTTCCAAGGGTCGCATGATCCATGGAAGAAAAGGTGGCCTCTACCTGTAAGCTATCGCCTGAAGAGGGGTTTGCGTCTGATTAGCTGGTTGGAGGGGTAACGGCCCACCAAGGCGACGATCAGTAGCCGGTCTGAGAGGATGAACGGCCACACTGGAACTGAGACACGGTCCAGACTCCTACGGGAGGCAGCA	D_0__Bacteria;D_1__Firmicutes;D_2__Negativicutes;D_3__Selenomonadales;D_4__Veillonellaceae;D_5__Dialister	0	0	0	0	0	0	0	0	0	0	0	0	0	0	0	0	0	0	0	0	0	0	0	0	0	0.335554	0	0	0	0	0	0	0	0	0	0	0	0	0	0	0	0	0	0
3b64659077cdf713705822b3497d5442	Dialister invisus	99.1914	99.7283	AGGGTTTGATTATGGCTCAGGACGAACGCTGGCGGCGTGCTTAACACATGCAAGTCGAACGAAAAGACGGAAAGAGCTTGCTCTTTTCAGAATTGAGTGGCAAACGGGTGAGTAACACGTAAACAACCTGCCTTCAGGATGGGGACAACAGACGGAAACGACTGCTAATACCGAATAAGTTCCAAGGGCCGCATGGCCCATGGAAGAAAAGGTGGCCTCTACCTGTAAGCTATCGCCTGAAGAGGGGTTTGCGTCTGATTAGCTGGTTGGAGGGGTAACGGCCCACCAAGGCGACGATCAGTAGCCGGTCTGAGAGGATGAACGGCCACACTGGAACTGAGACACGGTCCAGACTCCTACGGGAGGCAGCA	D_0__Bacteria;D_1__Firmicutes;D_2__Negativicutes;D_3__Selenomonadales;D_4__Veillonellaceae;D_5__Dialister	0	0	0	0	0	0	0	0	0	0	0	0	0	0	0.201776	0	0	0	0	0	0	0	0	0	0	0	0	0	0	0	0	0	0	0	0	0	0	0	0	0	0	0	0	0
47c6c259ae1b69c32d54850ab9d81da7	Dialister invisus	99.1914	99.4565	AGGGTTTGATTATGGCTCAGGACGAACGCTGGCGGCGTGCTTAACACATGCAAGTCGAACGAAAAGAGGGGAAGAGCTTGCTCTTTTCAGAATTGAGTGGCAAACGGGTGAGTAACACGTAAACAACCTGCCTTCAGGATGGGGACAACAGACGGAAACGACTGCTAATACCGAATAAGTTCCAAGAGCCGCATGGCCCATGGAAGAAAAGGTGGCCTCTACCTGTAAGCTATCGCCTGAAGAGGGGTTTGCGTCTGATTAGCTGGTTGGAGGGGTAACGGCCCACCAAGGCGACGATCAGTAGCCGGTCTGAGAGGATGAACGGCCACACTGGAACTGAGACACGGTCCAGACTCCTACGGGAGGCAGCA	D_0__Bacteria;D_1__Firmicutes;D_2__Negativicutes;D_3__Selenomonadales;D_4__Veillonellaceae;D_5__Dialister	0	0	0	0	0	0	0	0	0	0	0	0	0	0	0	0	0	0	0	0	0	0	0	0	0	0	0	0	0	0	0	0	0	0	0	0	0	0	0	0	0	0	0	0
4ae9d700edc39227b296325cd537f98f	Dialister invisus	99.1914	99.7283	AGGGTTTGATCATGGCTCAGGACGAACGCTGGCGGCGTGCTTAACACATGCAAGTCGAACGAAAAGACGGAAAGAGCTTGCTCTTTTCAGAATTGAGTGGCAAACGGGTGAGTAACACGTAAACAACCTGCCTTCAGGATGGGGACAACAGACGGAAACGACTGCTAATACCGAATAAGTTCCAAGAGCCGCATGGCCCATGGAAGAAAAGGTGGCCTCTACCTGTAAGCTATCGCCTGAAGAGGGGTTTGCGTCTGATTAGCTGGTTGGAGGGGTAACGGCCCACCAAGGCGACGATCAGTAGCCGGTCTGAGAGGATGAACGGCCACACTGGAACTGAGACACGGTCCAGACTCCTACGGGAGGCAGCA	D_0__Bacteria;D_1__Firmicutes;D_2__Negativicutes;D_3__Selenomonadales;D_4__Veillonellaceae;D_5__Dialister	0	0	0	0	0	0	0	0	0	0.0382653	0	0	0	0	0	0	0	0	0	0	0	0	0	0	0	0	0	0	0	0	0	0	0	0	0	0	0	0	0	0	0	0	0	0
4ec48cec542fa00a29cb92eeac8f0a6e	Dialister invisus	99.1914	99.4565	AGGGTTTGATTATGGCTCAGGACGAACGCTGGCGGCGTGCTTAACACATGCAAGTCGAACGAAAGGACGGGAAGAGCTTGCTCTTTCCGGAATTGAGTGGCAAACGGGTGAGTAACACGTAAACAACCTGCCTTCAGGATGGGGACAACAGACGGAAACGACTGCTAATACCGAATAAGTTCCAAGAGCCGCATGGCCCATGGAAGAAAAGGTGGCCTCTACCTGTAAGCTATCGCCTGAAGAGGGGTTTGCGTCTGATTAGCTGGTTGGAGGGGTAACGGCCCACCAAGGCGACGATCAGTAGCCGGTCTGAGAGGATGAACGGCCACACTGGAACTGAGACACGGTCCAGACTCCTACGGGAGGCAGCA	D_0__Bacteria;D_1__Firmicutes;D_2__Negativicutes;D_3__Selenomonadales;D_4__Veillonellaceae;D_5__Dialister	0	0	0	0	0	0	0	0	0	0	0	0	0	0	0	0	0	0	0	0	0	0	0	0	0	0	0	0	0	0	0	0	0	0	0	0	0	0	0	0	0	0	0	0
8da4e5632c4d14abd4af12e8bfff8a18	Dialister invisus	99.1914	99.4565	AGGGTTTGATCATGGCTCAGGACGAACGCTGGCGGCGTGCTTAACACATGCAAGTCGAACGAAAAGAGGGAAAGAGCTTGCTCTTTCCGGAATTGAGTGGCAAACGGGTGAGTAACACGTAAACAACCTGCCTTCAGGATGGGGACAACAGACGGAAACGACTGCTAATACCGAATAAGTTCCAAGGGCCGCATGGCCCATGGAAGAAAAGGTGGCCTCTACCTGTAAGCTATCGCCTGAAGAGGGGTTTGCGTCTGATTAGCTGGTTGGAGGGGTAACGGCCCACCAAGGCGACGATCAGTAGCCGGTCTGAGAGGATGAACGGCCACACTGGAACTGAGACACGGTCCAGACTCCTACGGGAGGCAGCA	D_0__Bacteria;D_1__Firmicutes;D_2__Negativicutes;D_3__Selenomonadales;D_4__Veillonellaceae;D_5__Dialister	0	0	0	0	0	0	0	0	0	0	0	0	0	0	0	0	0	0	0	0	0	0	0	0	0	0.0937577	0	0	0	0	0	0	0	0	0	0	0	0	0	0	0	0	0	0
965436c07bcfe998458357a62859cd24	Dialister invisus	99.1914	99.7283	AGGGTTTGATTATGGCTCAGGACGAACGCTGGCGGCGTGCTTAACACATGCAAGTCGAACGAAAAGAGGGAAAGAGCTTGCTCTTTCCGGAATTGAGTGGCAAACGGGTGAGTAACACGTAAACAACCTGCCTTCAGGATGGGGACAACAGACGGAAACGACTGCTAATACCGAATAAGTTCCAAGAGCCGCATGGCCCATGGAAGAAAAGGTGGCCTCTACCTGTAAGCTATCGCCTGAAGAGGGGTTTGCGTCTGATTAGCTGGTTGGAGGGGTAACGGCCCACCAAGGCGACGATCAGTAGCCGGTCTGAGAGGATGAACGGCCACACTGGAACTGAGACACGGTCCAGACTCCTACGGGAGGCAGCA	D_0__Bacteria;D_1__Firmicutes;D_2__Negativicutes;D_3__Selenomonadales;D_4__Veillonellaceae;D_5__Dialister	0	0	0	0	0	0	0	0	0	0	0	0	0	0	0	0	0	0	0.505853	0	0	0	0	0	0	0.167777	0	0	0	0	0	0	0	0	0	0	0	0	0	0	0	0	0	0
98bcc40c4d45b5672afa3eb5104a7a27	Dialister invisus	99.7305	99.1892	AGAGTTTGATTATGGCTCAGGACGAACGCTGGCGGCGTGCTTAACACATGCAAGTCGAACGAAAAGAGGGGAAGAGCTTGCTCTTTCCGGAATTGAGTGGCAAACGGGTGAGTAACACGTAAACAACCTGCCTTCAGGATGGGGACAACAGACGGAAACGACTGCTAATACCGAATAAGTTCCAAGGGCCGCATGGCCCATGGAAGAAAAGGTGGCCTCTACCTGTAAGCTATCGCCTGAAGAGGGGTTTGCGTCTGATTAGCTGGTTGGAGGGGTAACGGCCCACCAAGGCGACGATCAGTAGCCGGTCTGAGAGGATGAACGGCCACACTGGAACTGAGACACGGTCCAGACTCCTACGGGAGGCAGCA	D_0__Bacteria;D_1__Firmicutes;D_2__Negativicutes;D_3__Selenomonadales;D_4__Veillonellaceae;D_5__Dialister	0	0	0	0	0	0	0	0	0	0	0.448907	0	0	0	0	0	0	0	0	0	0	0	0	0	0	0	0	0	0	0	0	0	0	0	0	0	0	0	0	0	0	0	0	0
9baebb73168e4966e7cd77b4d4da6aa1	Dialister invisus	99.1957	98.1081	AGGGTTTGATTATGGCTCAGGACGAACGCTGGCGGCGTGCTTAACACATGCAAGTCGAACGAAAAGAGGGAAAGAGCTTGCTCTTTTTCCGGAATTGAGTGGCAAACGGGTGAGTAACACGTAAACAACCTGCCTTCAGGATGGGGACAACAGACGGAAACGACTGCTAATACCGAATAAGTTCCAAGGGTCGCATGATCCATGGAAGAAAAGGTGGCCTCTACCTGTAAGCTATCGCCTGAAGAGGGGTTTGCGTCTGATTAGCTGGTTGGAGGGGTAACGGCCCACCAAGGCGACGATCAGTAGCCGGTCTGAGAGGATGAACGGCCACACTGGAACTGAGACACGGTCCAGACTCCTACGGGAGGCAGCA	D_0__Bacteria;D_1__Firmicutes;D_2__Negativicutes;D_3__Selenomonadales;D_4__Veillonellaceae;D_5__Dialister	0	0	0	0	0	0	0	0	0	0	0	0	0	0	0	0	0	0	0.346871	0	0	0	0	0	0	0	0	0	0	0	0	0	0	0	0	0	0	0	0	0	0	0	0	0
b3438d536b8e72cb34919761a015f3a8	Dialister invisus	99.1914	99.4565	AGGGTTTGATTATGGCTCAGGACGAACGCTGGCGGCGTGCTTAACACATGCAAGTCGAACGAAAAGACGGAAAGAGCTTGCTCTTTCCGGAATTGAGTGGCAAACGGGTGAGTAACACGTAAACAACCTGCCTTCAGGATGGGGACAACAGACGGAAACGACTGCTAATACCGAATAAGCTCCAAGGGCCGCATGGCCCATGGAAGAAAAGGTGGCCTCTACCTGTAAGCTATCGCCTGAAGAGGGGTTTGCGTCTGATTAGCTGGTTGGAGGGGTAACGGCCCACCAAGGCGACGATCAGTAGCCGGTCTGAGAGGATGAACGGCCACACTGGAACTGAGACACGGTCCAGACTCCTACGGGAGGCAGCA	D_0__Bacteria;D_1__Firmicutes;D_2__Negativicutes;D_3__Selenomonadales;D_4__Veillonellaceae;D_5__Dialister	0	0	0	0	0	0	0	0	0	0	0	0	0	0	0	0	0	0	0	0	0	0	0	0	0	0	0	0	0	0	0	0	0	0	0	0	0	0	0	0	0	0	0	0
cc41daed5db607b9a83e0cb55effbde0	Dialister invisus	99.1914	99.4565	AGGGTTTGATCATGGCTCAGGACGAACGCTGGCGGCGTGCTTAACACATGCAAGTCGAACGAAAAGACGGAAAGAGCTTGCTCTTTCCGGAATTGAGTGGCAAACGGGTGAGTAACACGTAAACAACCTGCGTTCAGGATGGGGACAACAGACGGAAACGACTGCTAATACCGAATAAGTTCCAAGAGCCGCATGGCCCATGGAAGAAAAGGTGGCCTCTACCTGTAAGCTATCGCCTGAAGAGGGGTTTGCGTCTGATTAGCTGGTTGGAGGGGTAACGGCCCACCAAGGCGACGATCAGTAGCCGGTCTGAGAGGATGAACGGCCACACTGGAACTGAGACACGGTCCAGACTCCTACGGGAGGCAGCA	D_0__Bacteria;D_1__Firmicutes;D_2__Negativicutes;D_3__Selenomonadales;D_4__Veillonellaceae;D_5__Dialister	0	0	0	0	0	0	0	0	0	0	0	0	0	0	0	0	0	0	0	0	0	0	0	0	0	0	0	0	0	0	0	0	0	0	0	0	0	0	0	0	0	0	0	0
da5534c4cb25d0a72d4d9073a552d0b1	Dialister invisus	99.1914	100	AGGGTTTGATTATGGCTCAGGACGAACGCTGGCGGCGTGCTTAACACATGCAAGTCGAACGAAAAGACGGAAAGAGCTTGCTCTTTCCGGAATTGAGTGGCAAACGGGTGAGTAACACGTAAACAACCTGCCTTCAGGATGGGGACAACAGACGGAAACGACTGCTAATACCGAATAAGTTCCAAGAGCCGCATGGCCCATGGAAGAAAAGGTGGCCTCTACCTGTAAGCTATCGCCTGAAGAGGGGTTTGCGTCTGATTAGCTGGTTGGAGGGGTAACGGCCCACCAAGGCGACGATCAGTAGCCGGTCTGAGAGGATGAACGGCCACACTGGAACTGAGACACGGTCCAGACTCCTACGGGAGGCAGCA	D_0__Bacteria;D_1__Firmicutes;D_2__Negativicutes;D_3__Selenomonadales;D_4__Veillonellaceae;D_5__Dialister	0	0	0	0	0	0	0	0	0	0	0	0	0	0	0	0	0	0	0	0	0	0	0	0	0	0	0	0	0	0	0	0	0	0	0	0	0	0	0	0	0.196982	0	0	0
fc390c3f4e9f7c533d397bf607f58a4d	Dialister invisus	99.7305	100	AGAGTTTGATTATGGCTCAGGACGAACGCTGGCGGCGTGCTTAACACATGCAAGTCGAACGAAAAGACGGAAAGAGCTTGCTCTTTTCAGAATTGAGTGGCAAACGGGTGAGTAACACGTAAACAACCTGCCTTCAGGATGGGGACAACAGACGGAAACGACTGCTAATACCGAATAAGTTCCAAGAGCCGCATGGCCCATGGAAGAAAAGGTGGCCTCTACCTGTAAGCTATCGCCTGAAGAGGGGTTTGCGTCTGATTAGCTGGTTGGAGGGGTAACGGCCCACCAAGGCGACGATCAGTAGCCGGTCTGAGAGGATGAACGGCCACACTGGAACTGAGACACGGTCCAGACTCCTACGGGAGGCAGCA	D_0__Bacteria;D_1__Firmicutes;D_2__Negativicutes;D_3__Selenomonadales;D_4__Veillonellaceae;D_5__Dialister	0	0	0	0	0	0	0	0	0	0	0	0.428899	0	0	0	0	0	0	0	0	0	0	0	0	0	0	0	0	0	0	0	0	0	0	0	0	0	0	0	0	0	0	0	0
0b3c49059975e925887f4093091b70f0	Dialister micraerophilus	100	99.1892	AGAGTTTGATTATGGCTCAGGACGAACGCTGGCGGCGTGCTTAACACATGCAAGTCGAACGAGAGGACATGAAAAGCTTGCTTTTTATGAAATCTAGTGGCAAACGGGTGAGTAACACGTAAACAACCTGCCTTCAAGATGGGGACAACAGACGGAAACGACTGCTAATACCGAATACGATCCGAAAGTCGCATGACATTCGGATGAAAGGGTGGCCTATCGAAGAAGCTATCGCTTGAAGAGGGGTTTGCGTCCGATTAGGTAGTTGGTGAGGTAACGGCCCACCAAGCCGACGATCGGTAGCCGGTCTGAGAGGATGAACGGCCACACTGGAACTGAGACACGGTCCAGACTCCTACGGGAGGCAGCA	D_0__Bacteria;D_1__Firmicutes;D_2__Negativicutes;D_3__Selenomonadales;D_4__Veillonellaceae;D_5__Dialister;D_6__unidentified	0	0	0	0	0	0	0	0	0	0	0	0	0	0	0.237086	0	0	0	0	0	0	0	0	0	0	0	0	0	0	0.168376	0	0	0	0	0	0	0	0	0	0.164863	0	0	0.133882	0
0d3467d53d5a241633aac77749919ae1	Dialister micraerophilus	100	98.6486	AGGGTTTGATTATGGCTCAGGACGAACGCTGGCGGCGTGCTTAACACATGCAAGTCGAACGAGAGGACATGAAAAGCTTGCTTTTTATGAAATCTAGTGGCAAACGGGTGAGTAACACGTAAACAACCTGCCTTCAAGATGGGGACAACAGACGGAAACGACTGCTAATACCGAATACGATCCGAAAGTCGCATGACATTCGGATGAAAGGGTGGCCTATCGAAGAAGCTATCGCTTGAAGAGGGGTTTGCGTCCGATTAGGTAGTTGGTGAGGTAACGGCCCACCAAGCCGATGATCGGTAGCCGGTCTGAGAGGATGAACGGCCACACTGGAACTGAGACACGGTCCAGACTCCTACGGGAGGCAGCA	D_0__Bacteria;D_1__Firmicutes;D_2__Negativicutes;D_3__Selenomonadales;D_4__Veillonellaceae;D_5__Dialister;D_6__unidentified	0	0	0	0	0	0	0	0	0	0	0	0	0	0	0	0	0	0	0	0	0	0	0	0	0	0	0	0	0	0	0	0	0	0	0	0	0	0	0	0	0	0	0.0733161	0
16790ce866a7fa76b4568103a16c7fd1	Dialister micraerophilus	100	98.9189	AGGGTTTGATTATGGCTCAGGACGAACGCTGGCGGCGTGCTTAACACATGCAAGTCGAACGAGAGGACATGAAAAGCTTGCTTTTTATGAAATCTAGTGGCAAACGGGTGAGTAACACGTAAACAACCTGCCTTCAAGATGGGGACAACAGACGGAAACGACTGCTAATACCGAATACGATCCGAAAGTCGCATGACATTTGGATGAAAGGGTGGCCTATCGAAGAAGCTATCGCTTGAAGAGGGGTTTGCGTCCGATTAGGTAGTTGGTGAGGTAATGGCCCACCAAGCCGACGATCGGTAGCCGGTCTGAGAGGATGAACGGCCACACTGGAACTGAGACACGGTCCAGACTCCTACGGGAGGCAGCA	D_0__Bacteria;D_1__Firmicutes;D_2__Negativicutes;D_3__Selenomonadales;D_4__Veillonellaceae;D_5__Dialister;D_6__unidentified	0	0	0	0	0	0	0	0	0	0	0	0	0	0	0	0	0	0	0	0	0	0	0	0	0	0	0	0	0	0	0	0	0	0	0	0	0	0	0	0	0	0	0	0
1aaced9d46e489b286a17b8d0c6fb19c	Dialister micraerophilus	100	98.9189	AGGGTTTGATTATGGCTCAGGACGAACGCTGGCGGCGTGCTTAACACATGCAAGTCGAACGAGAGGACATGAAAAGCTTGCTTTTTATGAAATCTAGTGGCAAACGGGTGAGTAACACGTAAACAACCTGCCTTCAAGATGGGGACAACAGACGGAAACGACTGCTAATACCGAATACGATCCGAAAGTCGCATGACATTTGGATGAAAGGGTGGCCTATCGAAGAAGCTATCGCTTGAAGAGGGGTTTGCGTCCGATTAGGTAGTTGGTGAGGTAACGGCCCACCAAGCCGACAATCGGTAGCCGGTCTGAGAGGATGAACGGCCACACTGGAACTGAGACACGGTCCAGACTCCTACGGGAGGCAGCA	D_0__Bacteria;D_1__Firmicutes;D_2__Negativicutes;D_3__Selenomonadales;D_4__Veillonellaceae;D_5__Dialister;D_6__unidentified	0	0	0	0	0	0	0	0	0	0	0	0	0	0	0	0	0	0	0	0	0	0	0	0	0	0	0	0	0	0	0	0	0	0	0	0	0	0	0	0	0	0	0	0
2132c8918ae87c9b4c45023bbbf3937b	Dialister micraerophilus	100	99.4595	AGAGTTTGATCCTGGCTCAGGACGAACGCTGGCGGCGTGCTTAACACATGCAAGTCGAACGAGAGGACATGAAAAGCTTGCTTTTTATGAAATCTAGTGGCAAACGGGTGAGTAACACGTAAACAACCTGCCTTCAAGATGGGGACAACAGACGGAAACGACTGCTAATACCGAATACAATCCGAAAGTCGCATGACATTCGGATGAAAGGGTGGCCTATCGAAGAAGCTATCGCTTGAAGAGGGGTTTGCGTCCGATTAGGTAGTTGGTGAGGTAACGGCCCACCAAGCCGACGATCGGTAGCCGGTCTGAGAGGATGAACGGCCACACTGGAACTGAGACACGGTCCAGACTCCTACGGGAGGCAGCA	D_0__Bacteria;D_1__Firmicutes;D_2__Negativicutes;D_3__Selenomonadales;D_4__Veillonellaceae;D_5__Dialister;D_6__unidentified	0	0	0	0	0	0	0	0	0	0	0	0	0	0	0	0	0	0	0	0	0	0	0	0	0	0	0	0	0	0	0	0	0	0	0	0	0	0	0	0	0	0	0	0
3f571577a9c50b54978a5c768a851f71	Dialister micraerophilus	100	98.9189	AGGGTTTGATTATGGCTCAGGACGAACGCTGGCGGCGTGCTTAACACATGCAAGTCGAACGAGAGGACATGAAAAGCTTGCTTTTTATGAAATCTAGTGGCAAACGGGTGAGTAACACGTAAACAACCTGCCTTCAAGATGGGGACAACAGACGGAAACGACTGCTAATACCGAATATGATCCGAAAGTCGCATGACATTTGGATGAAAGGGTGGCCTATCGAAGAAGCTATCGCTTGAAGAGGGGTTTGCGTCCGATTAGGTAGTTGGTGAGGTAACGGCCCACCAAGCCGACGATCGGTAGCCGGTCTGAGAGGATGAACGGCCACACTGGAACTGAGACACGGTCCAGACTCCTACGGGAGGCAGCA	D_0__Bacteria;D_1__Firmicutes;D_2__Negativicutes;D_3__Selenomonadales;D_4__Veillonellaceae;D_5__Dialister;D_6__unidentified	0	0	0	0	0	0	0	0	0	0	0	0	0	0	0	0	0	0	0	0	0	0	0	0	0	0	0	0	0	0	0	0	0	0	0	0	0	0	0	0	0	0	0	0
3f7d2ff4dd85f48b1c6b0f618f7c3123	Dialister micraerophilus	100	94.0541	AGGGTTTGATTATGGCTCAGGACGAACGCTGGCGGCGTGCTTAACACATGCAAGTCGAACGAGAGGACATGAAAAGCTTGCTTTTTATGAAATCTAGTGGCAAACGGGTGAGTAACACGTAAACAACCTGCCTTCAAGATGGGGACAACAGACGGAAACGACTGCTAATACCGAATACGATCCGAAAGTCGCATGACATTTGGATGAAAGGGTGGCCTATCGAAGAAGCTATCGCTTGAAGAGGGGTTTGCGTCCCATTAGGCAGTTGGCGGGGTAACGGCCCACCAAACCGACGATGGATAGGGGTTCTGAGAGGAAGGTCCCCCACATTGGGACTGAGACACGGACCAAACTCCTACGGGAGGCAGCA	D_0__Bacteria;D_1__Firmicutes;D_2__Negativicutes;D_3__Selenomonadales;D_4__Veillonellaceae;D_5__Dialister;D_6__unidentified	0	0	0	0	0	0	0	0	0	0	0	0	0	0	0	0	0	0	0	0	0	0	0	0	0	0	0	0	0	0	0	0	0	0	0	0	0	0	0	0	0	0	0	0
59c6743395eb4c1c7c4e7cb9cc243c00	Dialister micraerophilus	100	98.9189	AGGGTTTGATTATGGCTCAGGACGAACGCTGGCGGCGTGCTTAACACATGCAAGTCGAACGAGAGGACATGAAAAGCTTGCTTTTTATGAAATCTAGTGGCAAACGGGTGAGTAACACGTAAACAACCTGCCTTCAAGATGGGGACAACAGACGGAAACGACTGCTAATACCGAATACGATTCGAAAGTCGCATGACATTTGGATGAAAGGGTGGCCTATCGAAGAAGCTATCGCTTGAAGAGGGGTTTGCGTCCGATTAGGTAGTTGGTGAGGTAACGGCCCACCAAGCCGACGATCGGTAGCCGGTCTGAGAGGATGAACGGCCACACTGGAACTGAGACACGGTCCAGACTCCTACGGGAGGCAGCA	D_0__Bacteria;D_1__Firmicutes;D_2__Negativicutes;D_3__Selenomonadales;D_4__Veillonellaceae;D_5__Dialister;D_6__unidentified	0	0	0	0	0	0	0	0	0	0	0	0	0	0	0	0	0	0	0	0	0	0	0	0	0	0	0	0	0	0	0	0	0	0	0	0	0.356535	0	0	0	0	0	0	0
648dfc93c2d3aec8500f96fc519ff47e	Dialister micraerophilus	100	98.6486	AGGGTTTGATCATGGCTCAGGACGAACGCTGGCGGCGTGCCTAATACATGCAAGTCGAACGAGAGGACATGAAAAGCTTGCTTTTTATGAAATCTAGTGGCAAACGGGTGAGTAACACGTAAACAACCTGCCTTCAAGATGGGGACAACAGACGGAAACGACTGCTAATACCGAATACGATCCGAAAGTCGCATGACATTCGGATGAAAGGGTGGCCTATCGAAGAAGCTATCGCTTGAAGAGGGGTTTGCGTCCGATTAGGTAGTTGGTGAGGTAACGGCCCACCAAGCCGACGATCGGTAGCCGGTCTGAGAGGATGAACGGCCACACTGGAACTGAGACACGGTCCAGACTCCTACGGGAGGCAGCA	D_0__Bacteria;D_1__Firmicutes;D_2__Negativicutes;D_3__Selenomonadales;D_4__Veillonellaceae;D_5__Dialister;D_6__unidentified	0	0	0	0	0	0	0	0	0	0	0	0	0	0	0	0	0	0	0	0	0	0	0	0	0	0	0	0	0	0	0	0	0	0	0	0	0	0	0	0	0	0	0	0
6a6683e7bef286819313a36bbaabc5ee	Dialister micraerophilus	100	99.4595	AGGGTTTGATCATGGCTCAGGACGAACGCTGGCGGCGTGCTTAACACATGCAAGTCGAACGAGAGGACATGAAAAGCTTGCTTTTTATGAAATCTAGTGGCAAACGGGTGAGTAACACGTAAACAACCTGCCTTCAAGATGGGGACAACAGACGGAAACGACTGCTAATACCGAATACGATCCGAAAGTCGCATGACATTTGGATGAAAGGGTGGCCTATCGAAGAAGCTATCGCTTGAAGAGGGGTTTGCGTCCGATTAGGTAGTTGGTGAGGTAACGGCCCACCAAGCCGACGATCGGTAGCCGGTCTGAGAGGATGAACGGCCACACTGGAACTGAGACACGGTCCAGACTCCTACGGGAGGCAGCA	D_0__Bacteria;D_1__Firmicutes;D_2__Negativicutes;D_3__Selenomonadales;D_4__Veillonellaceae;D_5__Dialister;D_6__unidentified	0	0	0	0	0	0	0	0	0	0	0	0	0	0	0	0	0	0	0	0	0.357684	0	0	0	0	0	0	0	0	0.280627	0.330469	0	0	0	0	0	0	0.193642	0	0.365565	0	0.041763	0.267763	0
6c3b313e6e45ce6e0b319818ce750a63	Dialister micraerophilus	100	99.4595	AGAGTTTGATTATGGCTCAGGACGAACGCTGGCGGCGTGCTTAACACATGCAAGTCGAACGAGAGGACATGAAAAGCTTGCTTTTTATGAAATCTAGTGGCAAACGGGTGAGTAACACGTAAACAACCTGCCTTCAAGATGGGGACAACAGACGGAAACGACTGCTAATACCGAATACGATCCGAAAGTCGCATGACATTTGGATGAAAGGGTGGCCTATCGAAGAAGCTATCGCTTGAAGAGGGGTTTGCGTCCGATTAGGTAGTTGGTGAGGTAACGGCCCACCAAGCCGACGATCGGTAGCCGGTCTGAGAGGATGAACGGCCACACTGGAACTGAGACACGGTCCAGACTCCTACGGGAGGCAGCA	D_0__Bacteria;D_1__Firmicutes;D_2__Negativicutes;D_3__Selenomonadales;D_4__Veillonellaceae;D_5__Dialister;D_6__unidentified	0	0.274123	0	0	0	0	0.115124	0	0	0	0	0	0	0	0.20682	0	0	0	0	0	0.400121	0	0	0	0	0	0	0	0	0.31124	0.231328	0	0	0	0	0	0	0.132322	0	0.179199	0	0	0.302827	0
9eb743625dbc67d07754a34e0b5c4a95	Dialister micraerophilus	100	98.9189	AGGGTTTGATTATGGCTCAGGACGAACGCTGGCGGCGTGCTTAACACATGCAAGTCGAACGAGAGGACATGAAAAGCTTGCTTTTTATGAAATCTAGTGGCAAACGGGTGAGTAACACGTAAACAACCTGCCTTCAAGATGGGGACAACAGACGGAAACGACTGCTAATACCGAATACGATCCGAAAGTCGCATGACATTCGGATGAAAGGGTGGCCTATCGAAGAAGCTATCGCTTGAAGAGGGGTTTGCGTCCGATTAGGTAGTTGGTGAGGTAACGGCCCACCAAGCCGACGATCGGTAGCCGGTCTGAGAGGATGAACGGCCACACTGGAACTGAGACACGGTCCAGACTCCTACGGGAGGCAGCA	D_0__Bacteria;D_1__Firmicutes;D_2__Negativicutes;D_3__Selenomonadales;D_4__Veillonellaceae;D_5__Dialister;D_6__unidentified	0	0	0	0	0	0	0	0	0	0	0	0	0	0	0	0	0	0	0	0	0.181873	0	0	0	0	0	0	0	0	0	0	0	0	0	0	0.443901	0	0	0	0.24371	0	0	0.194447	0
a016fc38deb7b6f8aeb0a5864e90fc88	Dialister micraerophilus	100	99.7297	AGAGTTTGATCATGGCTCAGGACGAACGCTGGCGGCGTGCTTAACACATGCAAGTCGAACGAGAGGACATGAAAAGCTTGCTTTTTATGAAATCTAGTGGCAAACGGGTGAGTAACACGTAAACAACCTGCCTTCAAGATGGGGACAACAGACGGAAACGACTGCTAATACCGAATACGATCCGAAAGTCGCATGACATTTGGATGAAAGGGTGGCCTATCGAAGAAGCTATCGCTTGAAGAGGGGTTTGCGTCCGATTAGGTAGTTGGTGAGGTAACGGCCCACCAAGCCGACGATCGGTAGCCGGTCTGAGAGGATGAACGGCCACACTGGAACTGAGACACGGTCCAGACTCCTACGGGAGGCAGCA	D_0__Bacteria;D_1__Firmicutes;D_2__Negativicutes;D_3__Selenomonadales;D_4__Veillonellaceae;D_5__Dialister;D_6__unidentified	0	0	0	0	0	0	0	0	0	0	0	0	0	0	0.166465	0	0.0457012	0	0	0	0.242498	0	0	0	0	0	0	0	0	0.193887	0.178453	0	0	0.232019	0	0	0	0.142004	0	0	0	0	0.184884	0
aa3468c0050f35fa2bb971e616ff820b	Dialister micraerophilus	100	98.6523	AGAGTTTGATCATGGCTCAGGACGAACGCTGGCGGCGTGCTTAACACATGCAAGTCGAACGGGAAGAGATGAAGAGCTTGCTCTTTATCAAATCCAGTGGCAAACGGGTGAGTAACACGTAAACAACCTGCCTTCAGGATGGGGACAACAGACGGAAACGACTGCTAATACCGAATACGTTCCACGGGTCGCATGACCTGTGGAAGAAAGGGTAGCCTCTACCTGTAAGCTATCGCCTGAAGAGGGGTTTGCGTCTGATTAGGCAGTTGGTGAGGTAACGGCTCACCAAACCAACGATCAGTAGCCGGTCTGAGAGGATGAACGGCCACACTGGAACTGAGACACGGTCCAGACTCCTACGGGAGGCAGCA	D_0__Bacteria;D_1__Firmicutes;D_2__Negativicutes;D_3__Selenomonadales;D_4__Veillonellaceae;D_5__Dialister;D_6__uncultured bacterium	0	0	0	0	0	0	0	0	0	0	0	0	0	0	0	0	0	0	0	0	0	0	0	0	0	0	0	0	0	0	0	0	0.292703	0	0	0	0	0	0	0	0	0	0	0
c1321deb79bdfcebfe26d6bd38b155ff	Dialister micraerophilus	100	98.3784	AGGGTTTGATTATGGCTCAGGACGAACGCTGGCGGCGTGCTTAACACATGCAAGTCGAACGAGAGGACATGAAAAGCTTGCTTTTTATGAAATCTAGTGGCAAACGGGTGAGTAACAAGTAAACAACCTGCCTTCAAGATGGGGACAACAGACGGAAACGACTGCTAATACCGAATACAATCCGAAAGTCGCATGACATTCGGATGAAAGGGTGGCCTATCGAAGAAGCTATCGCTTGAAGAGGGGTTTGCGTCCGATTAGGTAGTTGGTGAGGTAACGGCCCACCAAGCCGACGATCGGTAGCCGGTCTGAGAGGATGAACGGCCACACTGGAACTGAGACACGGTCCAGACTCCTACGGGAGGCAGCA	D_0__Bacteria;D_1__Firmicutes;D_2__Negativicutes;D_3__Selenomonadales;D_4__Veillonellaceae;D_5__Dialister;D_6__unidentified	0	0	0	0	0	0	0	0	0	0	0	0	0	0	0	0	0	0	0	0	0	0	0	0	0	0	0	0	0	0	0	0	0	0	0	0	0	0	0	0	0	0	0	0
cc579279ce278e4bd772debe2dcd6b3d	Dialister micraerophilus	100	99.1892	AGGGTTTGATCATGGCTCAGGACGAACGCTGGCGGCGTGCTTAACACATGCAAGTCGAACGAGAGGACATGAAAAGCTTGCTTTTTATGAAATCTAGTGGCAAACGGGTGAGTAACACGTAAACAACCTGCCTTCAAGATGGGGACAACAGACGGAAACGACTGCTAATACCGAATACGATCCGAAAGTCGCATGACATTCGGATGAAAGGGTGGCCTATCGAAGAAGCTATCGCTTGAAGAGGGGTTTGCGTCCGATTAGGTAGTTGGTGAGGTAACGGCCCACCAAGCCGACGATCGGTAGCCGGTCTGAGAGGATGAACGGCCACACTGGAACTGAGACACGGTCCAGACTCCTACGGGAGGCAGCA	D_0__Bacteria;D_1__Firmicutes;D_2__Negativicutes;D_3__Selenomonadales;D_4__Veillonellaceae;D_5__Dialister;D_6__unidentified	0	0	0	0	0	0	0	0	0	0	0	0	0	0	0.0958434	0	0	0	0	0	0	0	0	0	0	0	0	0	0	0	0	0	0	0	0	0	0	0	0	0.172031	0	0	0.124319	0
ed9a69be13a8aa8802b441345fc96805	Dialister micraerophilus	100	99.1892	AGGGTTTGATTATGGCTCAGGACGAACGCTGGCGGCGTGCTTAACACATGCAAGTCGAACGAGAGGACATGAAAAGCTTGCTTTTTATGAAATCTAGTGGCAAACGGGTGAGTAACACGTAAACAACCTGCCTTCAAGATGGGGACAACAGACGGAAACGACTGCTAATACCGAATACGATCCGAAAGTCGCATGACATTTGGATGAAAGGGTGGCCTATCGAAGAAGCTATCGCTTGAAGAGGGGTTTGCGTCCGATTAGGTAGTTGGTGAGGTAACGGCCCACCAAGCCGACGATCGGTAGCCGGTCTGAGAGGATGAACGGCCACACTGGAACTGAGACACGGTCCAGACTCCTACGGGAGGCAGCA	D_0__Bacteria;D_1__Firmicutes;D_2__Negativicutes;D_3__Selenomonadales;D_4__Veillonellaceae;D_5__Dialister;D_6__unidentified	0.133822	0	0	0	0	0	0	0	0	0	0	0	0	0	0.302663	0	0	0	0	0	0.52137	0	0	0.169824	0	0	0.262369	0	0	0.449003	0.403173	0.491117	0	0	0	0	0	0.174278	0.145016	0.20787	0	0	0.388894	0
f058b32ded32cce14e7392d0db24768f	Dialister micraerophilus	100	98.6523	AGGGTTTGATTATGGCTCAGGACGAACGCTGGCGGCGTGCTTAACACATGCAAGTCGAACGGGAAGAGATGAAGAGCTTGCTCTTTATTGAATCCAGTGGCAAACGGGTGAGTAACACGTAAACAACCTGCCTTCAGGATGGGGACAACAGACGGAAACGACTGCTAATACCGAATACGTTCCACGGGTCGCATGACCTGTGGAAGAAAGGGTAGCCTCTACCTGTAAGCTATCGCCTGAAGAGGGGTTTGCGTCTGATTAGGCAGTTGGTGGGGTAACGGCCCACCAAACCAACGATCAGTAGCCGGTCTGAGAGGATGAACGGCCACACTGGAACTGAGACACGGTCCAGACTCCTACGGGAGGCAGCA	D_0__Bacteria;D_1__Firmicutes;D_2__Negativicutes;D_3__Selenomonadales;D_4__Veillonellaceae;D_5__Dialister;D_6__uncultured bacterium	0	0	0	0.562463	0	0	0	0	0	0	0	0	0	0	0	0	0	0	0	0	0	0	0	0	0	0	0	0	0	0	0	0	0	0	0	0	0	0	0	0	0	0	0.168946	0
2a44e6d44f5ce2157a5e433e987ea5ea	Dialister pneumosintes			AGAGTTTGATTATGGCTCAGGACGAACGCTGGCGGCGTGCTTAACACATGCAAGTCGAACGGAAAGAGATGAAAGAGCTTGCTCTTTTATTAATTTCAGTGGCAAACGGGTGAGTAACACGTAAACAACCTGCCTTAAGGATGGGGATAACAGACGGAAACGACTGCTAATACCGAATACGTTCTAAGCATCGCATGGTGCATAGAAGAAAGGGTGGCCTCTACAAGAAAGCTATCGCCTTAAGAGGGGTTTGCGACTGATTAGGTAGTTGGTGAGGTAACGGCTCACCAAGCCGACGATCAGTAGCCGGTCTGAGAGGATGAACGGCCACACTGGAACTGAGACACGGTCCAGACTCCTACGGGAGGCAGCA	D_0__Bacteria;D_1__Firmicutes;D_2__Negativicutes;D_3__Selenomonadales;D_4__Veillonellaceae;D_5__Dialister;D_6__Dialister pneumosintes	0	0	0.229372	0	0	0	0	0	0	0.59949	0	0.428899	0	0	0	0	0	0.119811	0	0	0	0	0	0	0	0	0	0	0	0.19899	0	0	0	0.24608	0	0	0	0	0	0	0	0	0	0.214018
a4b64be50709566e082db1b969e75b14	Dialister pneumosintes			AGGGTTTGATTATGGCTCAGGACGAACGCTGGCGGCGTGCTTAACACATGCAAGTCGAACGGAAAGAGATGAAAGAGCTTGCTCTTTTATTAATTTCAGTGGCAAACGGGTGAGTAACACGTAAACAACCTGCCTTAAGGATGGGGATAACAGACGGAAACGACTGCTAATACCGAATACGTTCTAAGCATCGCATGGTGCATAGAAGAAAGGGTGGTCTCTACAAGAAAGCTATCGCCTTAAGAGGGGTTTGCGACTGATTAGGTAGTTGGTGAGGTAACGGCTCACCAAGCCGACGATCAGTAGCCGGTCTGAGAGGATGAACGGCCACACTGGAACTGAGACACGGTCCAGACTCCTACGGGAGGCAGCA	D_0__Bacteria;D_1__Firmicutes;D_2__Negativicutes;D_3__Selenomonadales;D_4__Veillonellaceae;D_5__Dialister;D_6__Dialister pneumosintes	0	0	0	0	0	0	0	0	0	0.299745	0	0	0	0	0	0	0	0	0	0	0	0	0	0	0	0	0	0	0	0	0	0	0	0	0	0	0	0	0	0	0	0	0	0
cf0c77fec1ef4ce467473c8206428d86	Dialister pneumosintes			AGGGTTTGATTATGGCTCAGGACGAACGCTGGCGGCGTGCTTAACACATGCAAGTCGAACGGAAAGAGATGAAAGAGCTTGCTCTTTTATTAATTTCAGTGGCAAACGGGTGAGTAACACGTAAACAACCTGCCTTAAGGATGGGGATAACAGACGGAAACGACTGCTAATACCGAATACGTTCTAAGCATCGCATGGTGCATAGAAGAAAGGGTGGCCTCTACAAGAAAGCTATCGCCTTAAGAGGGGTTTGCGACTGATTAGGTAGTTGGTGAGGTAACGGCTCACCAAGCCGACGATCAGTAGCCGGTCTGAGAGGATGAACGGCCACACTGGAACTGAGACACGGTCCAGACTCCTACGGGAGGCAGCA	D_0__Bacteria;D_1__Firmicutes;D_2__Negativicutes;D_3__Selenomonadales;D_4__Veillonellaceae;D_5__Dialister;D_6__Dialister pneumosintes	0	0	0.371955	0	0.0687548	0.577471	0.532451	0	0	0.918367	0.425281	0.525553	0	0	0.247175	0	0	0	0	0	0	0	0	0	0	0	0.0588991	0	0	0	0	0.556117	0	0.435914	0	0	0	0	0	0	0	0	0.10838	0
0b9359bd15a05e8e429ab1df43fb7b88	Dialister propionicifaciens	100	98.9218	AGAGTTTGATTATGGCTCAGGACGAACGCTGGCGGCGTGCTTAACACATGCAAGTCGAACGGGAAGAGATGAAGAGCTTGCTCTTTATCGAATCCAGTGGCAAACGGGTGAGTAACACGTAAACAACCTGCCTTCAGGATGGGGACAACAGACGGAAACGACTGCTAATACCGAATACGTTCCACGGGCCGCATGACCTGTGGAAGAAAGGGTAGCCTCTACCTGTAAGCTATCGCCTGAAGAGGGGTTTGCGTCTGATTAGGCAGTTGGTGAGGTAACGGCTCACCAAACCAACGATCAGTAGCCGGTCTGAGAGGATGAACGGCCACACTGGAACTGAGACACGGTCCAGACTCCTACGGGAGGCAGCA	D_0__Bacteria;D_1__Firmicutes;D_2__Negativicutes;D_3__Selenomonadales;D_4__Veillonellaceae;D_5__Dialister;D_6__uncultured bacterium	0	0	0	0.133215	0	0	0	0	0	0	0	0.0664492	0	0	0	0	0	0	0	0.0643275	0.054562	0	0.323189	0	0.0284917	0	0.0696081	0	0.0463177	0	0	0	0	0	0	0	0	0	0	0	0	0	0	0
0e67a8ff1da9e91d93a7aff2e33cc3c3	Dialister propionicifaciens	100	98.9218	AGGGTTTGATCATGGCTCAGGACGAACGCTGGCGGCGTGCTTAACACATGCAAGTCGAACGGGAAGAGATGAAGAGCTTGCTCTTTATCGAATCCAGTGGCAAACGGGTGAGTAACACGTAAACAACCTGCCTTCAGGATGGGGACAACAGACGGAAACGACTGCTAATACCGAATACGTTCCACGGGCCGCATGACCTGTGGAAGAAAGGGTAGCCTCTACCTGTAAGCTATCGCCTGAAGAGGGGTTTGCGTCTGATTAGGCAGTTGGTGAGGTAACGGCTCACCAAACCAACGATCAGTAGCCGGTCTGAGAGGATGAACGGCCACACTGGAACTGAGACACGGTCCAGACTCCTACGGGAGGCAGCA	D_0__Bacteria;D_1__Firmicutes;D_2__Negativicutes;D_3__Selenomonadales;D_4__Veillonellaceae;D_5__Dialister;D_6__uncultured bacterium	0	0	0	0.170219	0	0	0	0.0255076	0	0	0	0.0966534	0	0	0	0	0	0	0	0.0935673	0.054562	0	0.220846	0	0.03419	0	0.0481902	0	0	0	0	0	0	0	0	0	0	0	0	0	0	0	0	0
158c09a63db02356890cade97b3e7f34	Dialister propionicifaciens	100	98.6523	AGGGTTTGATTATGGCTCAGGACGAACGCTGGCGGCGTGCTTAACACATGCAAGTCGAACGGGAAGAGATGAAGAGCTTGCTCTTTATCAAATCCAGTGGCAAACGGGTGAGTAACACGTAAACAACCTGCCTTCAGGATGGGGACAACAGACGGAAACGACTGCTAATACCGAATACGTTCCACGGGCCGCATGACCTGTGGAAGAAAGGGTAGCCTCTACCTGTAAGCTATCGCCTGAAGAGGGGTTTGCGTCTGATTAGGCAGTTGGTGGGGTAACGGCTCACCAAACCAACGATCAGTAGCCGGTCTGAGAGGATGAACGGCCACACTGGAACTGAGACACGGTCCAGACTCCTACGGGAGGCAGCA	D_0__Bacteria;D_1__Firmicutes;D_2__Negativicutes;D_3__Selenomonadales;D_4__Veillonellaceae;D_5__Dialister;D_6__uncultured bacterium	0	0.58114	0	0	0	0.532473	0.143906	0	0	0	0	0	0	0	0	0	0	0	0.264971	0	0	0	0	0	0	0	0	0	0	0	0.297422	0	0	0	0	0	0	0.0806842	0	0	0.140701	0	0	0
1a0f1719efc8ff9ce09f059fb5507d77	Dialister propionicifaciens	100	98.9218	AGGGTTTGATTATGGCTCAGGACGAACGCTGGCGGCGTGCTTAACACATGCAAGTCGAACGGGAAGAGATGAGGAGCTTGCTCTTTATCGAATCCAGTGGCAAACGGGTGAGTAACACGTAAACAACCTGCCTTCAGGATGGGGACAACAGACGGAAACGACTGCTAATACCGAATACGTTCCACGGGCCGCATGACCTGTGGAAGAAAGGGTAGCCTCTACCTGTAAGCTATCGCCTGAAGAGGGGTTTGCGTCTGATTAGGCAGTTGGTGGGGTAACGGCCCACCAAACCAACGATCAGTAGCCGGTCTGAGAGGATGAACGGCCACACTGGAACTGAGACACGGTCCAGACTCCTACGGGAGGCAGCA	D_0__Bacteria;D_1__Firmicutes;D_2__Negativicutes;D_3__Selenomonadales;D_4__Veillonellaceae;D_5__Dialister;D_6__uncultured bacterium	0	0	0	0	0	0	0	0	0	0	0	0	0	0	0	0	0	0	0	0	0	0	0.377054	0	0	0	0	0	0	0	0	0	0	0	0	0	0	0	0	0	0	0	0	0
1ae72f040d10eca475722c4347e86670	Dialister propionicifaciens	100	98.3827	AGGGTTTGATTATGGCTCAGGACGAACGCTGGCGGCGTGCTTAACACATGCAAGTCGAACGGGAAGAGATGAAGAGCTTGCTCTTTATCAAATCCAGTGGCAAACGGGTGAGTAACACGTAAACAACCTGCCTTCAGGATGGGGACAACAGACGGAAACGACTGCTAATACCGAATACGTTCCACGGGCCGCATGACCTGTGGAAGAAAGGGTAGCCTCTACCTATAAGCTATCGCCTGAAGAGGGGTTTGCGTCTGATTAGGCAGTTGGTGAGGTAACGGCCCACCAAACCAACGATCAGTAGCCGGTCTGAGAGGATGAACGGCCACACTGGAACTGAGACACGGTCCAGACTCCTACGGGAGGCAGCA	D_0__Bacteria;D_1__Firmicutes;D_2__Negativicutes;D_3__Selenomonadales;D_4__Veillonellaceae;D_5__Dialister;D_6__uncultured bacterium	0	0	0	0	0	0	0	0	0	0	0	0	0	0	0	0	0	0	0	0	0.315247	0	0	0	0	0	0	0	0	0	0	0	0	0	0	0	0	0	0	0	0	0	0	0
27a5a985221acc2d130a37b44fa5d701	Dialister propionicifaciens	100.792	89.5288	AGGGTTTGATCCTGGCTCAGGACGAACGCTGGCGGCGTGCTTAACACATGCAAGTCGAACGGGATTTAGTAGACAGAAACCTCGGTGGAAGATTACTAATGAGAGTGGCGAACGGGTGAGTAACGCGTGAGCAACCTGTCCTTTTCTTTGGGATAACGGCTGGAAACGGCTGCTAATACTGGATACGTTCCACGGGCCGCATGACCTGTGGAAGAAAGGGTAGCCTCTACCTGTAAGCTATCGCCTGAAGAGGGGTTTGCGTCTGATTAGGCAGTTGGTGGGGTAACGGCCCACCAAACCAACGATCAGTAGCCGGTCTGAGAGGATGAACGGCCACACTGGAACTGAGACACGGTCCAGACTCCTACGGGAGGCAGCA	D_0__Bacteria;D_1__Firmicutes;D_2__Negativicutes;D_3__Selenomonadales;D_4__Veillonellaceae;D_5__Dialister	0	0	0	0	0	0	0	0	0	0	0	0	0	0	0	0	0	0	0	0	0	0	0	0	0	0	0	0	0	0	0	0	0	0	0	0	0.00654193	0	0	0	0	0	0	0
2b42fb40ef1f9b80af652a14f4d8ac34	Dialister propionicifaciens	100	98.9218	AGGGTTTGATTATGGCTCAGGACGAACGCTGGCGGCGTGCTTAACACATGCAAGTCGAACGGGAAGAGATGAAGAGCTTGCTCTTTATCGAATCCAGTGGCAAACGGGTGAGTAACACGTAAACAACCTGCCTTCAGGATGGGGACAACAGACGGAAACGACTGCTAATACCGAATACGTTCCACGGGCCGCATGACCTGTGGAAGAAAGGGTAGCCTCTACCTGTAAGCTATCGCCTGAAGAGGGGTTTGCGTCTGATTAGGCAGTTGGTGGGGTAACGGCTCACCAAACCAACGATCAGTAGCCGGTCTGAGAGGATGAACGGCCACACTGGAACTGAGACACGGTCCAGACTCCTACGGGAGGCAGCA	D_0__Bacteria;D_1__Firmicutes;D_2__Negativicutes;D_3__Selenomonadales;D_4__Veillonellaceae;D_5__Dialister;D_6__uncultured bacterium	0	0	0	0	0	0.374981	0.0791481	0	0	0	0.0826934	0	0	0	0	0	0	0	0.284241	0.0994152	0	0	0	0	0	0	0	0	0	0	0	0	0	0	0	0	0	0.148459	0	0	0	0	0	0
2b4b3e03206bf649f7b042e5341e40db	Dialister propionicifaciens	100	98.9218	AGGGTTTGATTATGGCTCAGGACGAACGCTGGCGGCGTGCTTAACACATGCAAGTCGAACGGGAAGAGATGAAGAGCTTGCTCTTTATCGAATCCAGTGGCAAACGGGTGAGTAACACGTAAACAACCTGCCTTCAGGATGGGGACAACAGACGGAAACGACTGCTAATACCGAATACGTTCCACGGGCCGCATGACCTGTGGAAGAAAGGGTAGCCTCTACCAGTAAGCTATCGCCTGAAGAGGGGTTTGCGTCTGATTAGGCAGTTGGTGGGGTAACGGCCCACCAAACCAACGATCAGTAGCCGGTCTGAGAGGATGAACGGCCACACTGGAACTGAGACACGGTCCAGACTCCTACGGGAGGCAGCA	D_0__Bacteria;D_1__Firmicutes;D_2__Negativicutes;D_3__Selenomonadales;D_4__Veillonellaceae;D_5__Dialister;D_6__uncultured bacterium	0	0	0	0	0	0	0	0	0	0	0	0	0	0	0	0	0	0	0	0.374269	0	0	0	0	0	0	0	0	0	1.21435	0	0	0	0	0	0	0	0	0	0	0	0	0	0
32ab8016a7ac93e18f7ce0a8e147014f	Dialister propionicifaciens	100	98.9218	AGGGTTTGATCATGGCTCAGGACGAACGCTGGCGGCGTGCTTAACACATGCAAGTCGAACGGGAAGAGATGAAGAGCTTGCTCTTTATCGAATCCAGTGGCAAACGGGTGAGTAACACGTAAACAACCTGCCTTTAGGATGGGGACAACAGACGGAAACGACTGCTAATACCGAATGCGTTCCACGGGCCGCATGACCTGTGGAAGAAAGGGTAGCCTCTACCTGTAAGCTATCGCCTGAAGAGGGGTTTGCGTCTGATTAGGCAGTTGGTGGGGTAACGGCCCACCAAACCAACGATCAGTAGCCGGTCTGAGAGGATGAACGGCCACACTGGAACTGAGACACGGTCCAGACTCCTACGGGAGGCAGCA	D_0__Bacteria;D_1__Firmicutes;D_2__Negativicutes;D_3__Selenomonadales;D_4__Veillonellaceae;D_5__Dialister;D_6__uncultured bacterium	0	0	0	0	0	0	0	0	0	0	0	0	0	0	0	0	0	0	0	0	0	0	0	0	0	0	0	0	0	0	0	0	0	0	0	0	0	0	0	0	0	0	0	0
3fe3f4a5dbb17e8ad6bc642be991bd51	Dialister propionicifaciens	100	98.6523	AGGGTTTGATTATGGCTCAGGACGAACGCTGGCGGCGTGCTTAACACATGCAAGTCGAACGGGAAGAGATGAAGAGCTTGCTCTTTATCGAATCCAGTGGCAAACGGGTGAGTAACACGTAAACAACCTGCCTTCAGGATGGGGACAACAGACGGAAACGACTGCTAATACCGAATACGTTCCACGGGCCGCATGACCTGTGGAAGAAAGGGTAGCCTCTACCTGTAAGCTATCGCCTGAAGAGGGGTTTGCGTCTGATTAGGCAGTTGGTGAGGTAACGGCTCACCAAACCAACGATCAGTAGCCGGTCTGAGAGGATGAACGGCCACACTGGAACTGAGACACGGTCCAGACTCCTACGGGAGGCAGCA	D_0__Bacteria;D_1__Firmicutes;D_2__Negativicutes;D_3__Selenomonadales;D_4__Veillonellaceae;D_5__Dialister;D_6__uncultured bacterium	0	0	0	0.140616	0	0	0	0.0918274	0	0	0	0.0845717	0	0	0	0	0	0	0	0.146199	0.0606244	0	0.333962	0	0.0569833	0	0.112444	0	0	0	0	0	0	0	0	0	0	0	0	0	0	0	0	0
45fe35cc4a10d1f58cca9be6cc5b550b	Dialister propionicifaciens	100	98.9218	AGAGTTTGATTATGGCTCAGGACGAACGCTGGCGGCGTGCTTAACACATGCAAGTCGAACGGGAAGAGATGAAGAGCTTGCTCTTTATCAAATCCAGTGGCAAACGGGTGAGTAACACGTAAACAACCTGCCTTCAGGATGGGGACAACAGACGGAAACGACTGCTAATACCGAATACGTTCCACGGGCCGCATGACCTGTGGAAGAAAGGGTAGCCTCTACCTGTAAGCTATCGCCTGAAGAGGGGTTTGCGTCTGATTAGGCAGTTGGTGAGGTAACGGCCCACCAAACCAACGATCAGTAGCCGGTCTGAGAGGATGAACGGCCACACTGGAACTGAGACACGGTCCAGACTCCTACGGGAGGCAGCA	D_0__Bacteria;D_1__Firmicutes;D_2__Negativicutes;D_3__Selenomonadales;D_4__Veillonellaceae;D_5__Dialister;D_6__uncultured bacterium	0	0	0	0	0	0	0	0	0	0	0.1772	0	0	0	0.141243	0	0	0	0	0	0	0	0	0	0	0	0.117798	0	0	0.0255115	0	0	0	0	0	0	0	0	0	0	0	0	0	0
[truncated: 59 more rows]
[truncated: 72 more columns]
